# Supplementary material for: Autosomal Allelic Inactivation: Variable Replication and Dosage Sensitivity
Source: bioRxiv preprint, doi:10.1101/2025.08.13.670061, version 4 (2026-05-06)
Supplement: Supplemental Table 2 [file 670061_file12.xlsx]

## Sheet: RNAseq
chrom	start	stop	name	score	strand	paternal_counts	maternal_counts	strand_reads	total_reads	aei	sample	informative_reads_per_kb	binom_pval	fdr_pval	fdr_reject	name_strand	70_percent_aei	80_percent_aei	90_percent_aei	95_percent_aei
chr1	33306765	33321098	A3GALT2	0	-	8	7	minus	15	0.0333333	acp6_c1_rnaAligned	1.04654	1	1	FALSE	A3GALT2_minus	FALSE	FALSE	FALSE	FALSE
chr22	42692120	42721301	A4GALT	0	-	29	17	minus	46	0.130435	acp6_c1_rnaAligned	1.57637	0.103805	0.397484	FALSE	A4GALT_minus	FALSE	FALSE	FALSE	FALSE
chr22	42692120	42721301	A4GALT	0	-	48	51	minus	99	-0.0151515	acp6_c2_rnaAligned	3.39262	0.840822	1	FALSE	A4GALT_minus	FALSE	FALSE	FALSE	FALSE
chr22	42692120	42721301	A4GALT	0	-	53	66	minus	119	-0.0546218	acp6_c5_rnaAligned	4.078	0.271248	0.696198	FALSE	A4GALT_minus	FALSE	FALSE	FALSE	FALSE
chr22	42692120	42721301	A4GALT	0	-	59	84	minus	143	-0.0874126	acp6_c6_rnaAligned	4.90045	0.0443729	0.251166	FALSE	A4GALT_minus	FALSE	FALSE	FALSE	FALSE
chr22	42692120	42721301	A4GALT	0	-	57	35	minus	92	0.119565	acp7_c1_rnaAligned	3.15274	0.0280169	0.200012	FALSE	A4GALT_minus	FALSE	FALSE	FALSE	FALSE
chr22	42692120	42721301	A4GALT	0	-	42	43	minus	85	-0.0058824	acp7_c2_rnaAligned	2.91285	1	1	FALSE	A4GALT_minus	FALSE	FALSE	FALSE	FALSE
chr22	42692120	42721301	A4GALT	0	-	71	40	minus	111	0.13964	acp7_c4_rnaAligned	3.80384	0.00419553	0.0486351	TRUE	A4GALT_minus	FALSE	FALSE	FALSE	FALSE
chr12	125065434	125143316	AACS	0	+	45	47	plus	92	-0.0108696	acp6_c1_rnaAligned	1.18127	0.917041	1	FALSE	AACS_plus	FALSE	FALSE	FALSE	FALSE
chr12	125065434	125143316	AACS	0	+	29	38	plus	67	-0.0671642	acp6_c2_rnaAligned	0.860276	0.328432	0.724845	FALSE	AACS_plus	FALSE	FALSE	FALSE	FALSE
chr12	125065434	125143316	AACS	0	+	27	28	plus	55	-0.0090909	acp6_c5_rnaAligned	0.706197	1	1	FALSE	AACS_plus	FALSE	FALSE	FALSE	FALSE
chr12	125065434	125143316	AACS	0	+	41	26	plus	67	0.11194	acp6_c6_rnaAligned	0.860276	0.0864372	0.377056	FALSE	AACS_plus	FALSE	FALSE	FALSE	FALSE
chr12	125065434	125143316	AACS	0	+	59	76	plus	135	-0.062963	acp7_c1_rnaAligned	1.73339	0.168259	0.564887	FALSE	AACS_plus	FALSE	FALSE	FALSE	FALSE
chr12	125065434	125143316	AACS	0	+	51	52	plus	103	-0.0048544	acp7_c2_rnaAligned	1.32251	1	1	FALSE	AACS_plus	FALSE	FALSE	FALSE	FALSE
chr12	125065434	125143316	AACS	0	+	61	62	plus	123	-0.004065	acp7_c4_rnaAligned	1.57931	1	1	FALSE	AACS_plus	FALSE	FALSE	FALSE	FALSE
chr4	170060221	170094292	AADAT	0	-	41	37	minus	78	0.025641	acp6_c1_rnaAligned	2.28934	0.734342	0.990799	FALSE	AADAT_minus	FALSE	FALSE	FALSE	FALSE
chr4	170060221	170094292	AADAT	0	-	24	18	minus	42	0.0714286	acp6_c2_rnaAligned	1.23272	0.440799	0.820207	FALSE	AADAT_minus	FALSE	FALSE	FALSE	FALSE
chr4	170060221	170094292	AADAT	0	-	32	31	minus	63	0.00793651	acp6_c5_rnaAligned	1.84908	1	1	FALSE	AADAT_minus	FALSE	FALSE	FALSE	FALSE
chr4	170060221	170094292	AADAT	0	-	31	34	minus	65	-0.0230769	acp6_c6_rnaAligned	1.90778	0.804317	1	FALSE	AADAT_minus	FALSE	FALSE	FALSE	FALSE
chr15	67200666	67255198	AAGAB	0	-	186	193	minus	379	-0.0092348	acp6_c1_rnaAligned	6.95005	0.757978	0.997045	FALSE	AAGAB_minus	FALSE	FALSE	FALSE	FALSE
chr15	67200666	67255198	AAGAB	0	-	181	188	minus	369	-0.0094851	acp6_c2_rnaAligned	6.76667	0.754825	1	FALSE	AAGAB_minus	FALSE	FALSE	FALSE	FALSE
chr15	67200666	67255198	AAGAB	0	-	152	190	minus	342	-0.0555556	acp6_c5_rnaAligned	6.27155	0.0452633	0.270095	FALSE	AAGAB_minus	FALSE	FALSE	FALSE	FALSE
chr15	67200666	67255198	AAGAB	0	-	232	225	minus	457	0.00765864	acp6_c6_rnaAligned	8.3804	0.779001	1	FALSE	AAGAB_minus	FALSE	FALSE	FALSE	FALSE
chr15	67200666	67255198	AAGAB	0	-	88	90	minus	178	-0.005618	acp7_c1_rnaAligned	3.26414	0.94028	1	FALSE	AAGAB_minus	FALSE	FALSE	FALSE	FALSE
chr15	67200666	67255198	AAGAB	0	-	44	51	minus	95	-0.0368421	acp7_c2_rnaAligned	1.7421	0.538394	0.89608	FALSE	AAGAB_minus	FALSE	FALSE	FALSE	FALSE
chr15	67200666	67255198	AAGAB	0	-	54	61	minus	115	-0.0304348	acp7_c4_rnaAligned	2.10885	0.576012	0.923748	FALSE	AAGAB_minus	FALSE	FALSE	FALSE	FALSE
chr2	69457996	69643739	AAK1	0	-	79	94	minus	173	-0.0433526	acp6_c1_rnaAligned	0.931394	0.287118	0.67343	FALSE	AAK1_minus	FALSE	FALSE	FALSE	FALSE
chr2	69457996	69643739	AAK1	0	-	92	110	minus	202	-0.0445545	acp6_c2_rnaAligned	1.08752	0.231569	0.602169	FALSE	AAK1_minus	FALSE	FALSE	FALSE	FALSE
chr2	69457996	69643739	AAK1	0	-	51	62	minus	113	-0.0486726	acp6_c5_rnaAligned	0.608367	0.346893	0.773808	FALSE	AAK1_minus	FALSE	FALSE	FALSE	FALSE
chr2	69457996	69643739	AAK1	0	-	87	86	minus	173	0.00289017	acp6_c6_rnaAligned	0.931394	1	1	FALSE	AAK1_minus	FALSE	FALSE	FALSE	FALSE
chr2	69457996	69643739	AAK1	0	-	344	381	minus	725	-0.0255172	acp7_c1_rnaAligned	3.90324	0.181181	0.57639	FALSE	AAK1_minus	FALSE	FALSE	FALSE	FALSE
chr2	69457996	69643739	AAK1	0	-	262	285	minus	547	-0.0210238	acp7_c2_rnaAligned	2.94493	0.346892	0.740533	FALSE	AAK1_minus	FALSE	FALSE	FALSE	FALSE
chr2	69457996	69643739	AAK1	0	-	212	203	minus	415	0.0108434	acp7_c4_rnaAligned	2.23427	0.694587	0.988319	FALSE	AAK1_minus	FALSE	FALSE	FALSE	FALSE
chr11	77821143	77906024	AAMDC	0	+	33	36	plus	69	-0.0217391	acp7_c1_rnaAligned	0.812903	0.809949	1	FALSE	AAMDC_plus	FALSE	FALSE	FALSE	FALSE
chr11	77821143	77906024	AAMDC	0	+	44	27	plus	71	0.119718	acp7_c2_rnaAligned	0.836465	0.0568147	0.298882	FALSE	AAMDC_plus	FALSE	FALSE	FALSE	FALSE
chr11	77821143	77906024	AAMDC	0	+	33	34	plus	67	-0.0074627	acp7_c4_rnaAligned	0.78934	1	1	FALSE	AAMDC_plus	FALSE	FALSE	FALSE	FALSE
chr20	36236477	36256933	AAR2	0	+	8	9	plus	17	-0.0294118	acp6_c1_rnaAligned	0.831052	1	1	FALSE	AAR2_plus	FALSE	FALSE	FALSE	FALSE
chr20	36236477	36256933	AAR2	0	+	6	10	plus	16	-0.125	acp6_c5_rnaAligned	0.782167	0.454498	0.851422	FALSE	AAR2_plus	FALSE	FALSE	FALSE	FALSE
chr20	36236477	36256933	AAR2	0	+	5	5	plus	10	0	acp6_c6_rnaAligned	0.488854	1	1	FALSE	AAR2_plus	FALSE	FALSE	FALSE	FALSE
chr16	70252297	70289506	AARS1	0	-	250	206	minus	456	0.0482456	acp6_c1_rnaAligned	12.2551	0.043927	0.232495	FALSE	AARS1_minus	FALSE	FALSE	FALSE	FALSE
chr16	70252297	70289506	AARS1	0	-	487	466	minus	953	0.0110178	acp6_c2_rnaAligned	25.6121	0.517095	0.879737	FALSE	AARS1_minus	FALSE	FALSE	FALSE	FALSE
chr16	70252297	70289506	AARS1	0	-	175	161	minus	336	0.0208333	acp6_c5_rnaAligned	9.03007	0.47825	0.869653	FALSE	AARS1_minus	FALSE	FALSE	FALSE	FALSE
chr16	70252297	70289506	AARS1	0	-	477	460	minus	937	0.0090715	acp6_c6_rnaAligned	25.1821	0.601209	0.926526	FALSE	AARS1_minus	FALSE	FALSE	FALSE	FALSE
chr16	70252297	70289506	AARS1	0	-	4	6	minus	10	-0.1	acp7_c1_rnaAligned	0.268752	0.753906	1	FALSE	AARS1_minus	FALSE	FALSE	FALSE	FALSE
chr16	70252297	70289506	AARS1	0	-	5	7	minus	12	-0.0833333	acp7_c2_rnaAligned	0.322503	0.774414	1	FALSE	AARS1_minus	FALSE	FALSE	FALSE	FALSE
chr6	44298730	44313347	AARS2	0	-	31	28	minus	59	0.0254237	acp6_c1_rnaAligned	4.0364	0.794844	1	FALSE	AARS2_minus	FALSE	FALSE	FALSE	FALSE
chr6	44298730	44313347	AARS2	0	-	23	21	minus	44	0.0227273	acp6_c2_rnaAligned	3.01019	0.880396	1	FALSE	AARS2_minus	FALSE	FALSE	FALSE	FALSE
chr6	44298730	44313347	AARS2	0	-	15	12	minus	27	0.0555556	acp6_c5_rnaAligned	1.84716	0.701108	0.980714	FALSE	AARS2_minus	FALSE	FALSE	FALSE	FALSE
chr6	44298730	44313347	AARS2	0	-	24	22	minus	46	0.0217391	acp6_c6_rnaAligned	3.14702	0.882996	1	FALSE	AARS2_minus	FALSE	FALSE	FALSE	FALSE
chr6	44298730	44313347	AARS2	0	-	13	17	minus	30	-0.0666667	acp7_c1_rnaAligned	2.0524	0.584665	0.931394	FALSE	AARS2_minus	FALSE	FALSE	FALSE	FALSE
chr6	44298730	44313347	AARS2	0	-	6	7	minus	13	-0.0384615	acp7_c2_rnaAligned	0.889375	1	1	FALSE	AARS2_minus	FALSE	FALSE	FALSE	FALSE
chr6	44298730	44313347	AARS2	0	-	18	14	minus	32	0.0625	acp7_c4_rnaAligned	2.18923	0.596615	0.932723	FALSE	AARS2_minus	FALSE	FALSE	FALSE	FALSE
chr17	42950525	42964454	AARSD1	0	-	12	11	minus	23	0.0217391	acp7_c1_rnaAligned	1.65123	1	1	FALSE	AARSD1_minus	FALSE	FALSE	FALSE	FALSE
chr17	42950525	42964454	AARSD1	0	-	10	7	minus	17	0.0882353	acp7_c2_rnaAligned	1.22048	0.629059	0.939699	FALSE	AARSD1_minus	FALSE	FALSE	FALSE	FALSE
chr17	42950525	42964454	AARSD1	0	-	11	7	minus	18	0.111111	acp7_c4_rnaAligned	1.29227	0.480682	0.86701	FALSE	AARSD1_minus	FALSE	FALSE	FALSE	FALSE
chr4	56338289	56387491	AASDH	0	-	130	159	minus	289	-0.050173	acp6_c1_rnaAligned	5.87374	0.0993787	0.385674	FALSE	AASDH_minus	FALSE	FALSE	FALSE	FALSE
chr4	56338289	56387491	AASDH	0	-	140	156	minus	296	-0.027027	acp6_c2_rnaAligned	6.01602	0.383319	0.772804	FALSE	AASDH_minus	FALSE	FALSE	FALSE	FALSE
chr4	56338289	56387491	AASDH	0	-	116	110	minus	226	0.0132743	acp6_c5_rnaAligned	4.59331	0.739523	0.997325	FALSE	AASDH_minus	FALSE	FALSE	FALSE	FALSE
chr4	56338289	56387491	AASDH	0	-	170	138	minus	308	0.0519481	acp6_c6_rnaAligned	6.25991	0.0771605	0.352618	FALSE	AASDH_minus	FALSE	FALSE	FALSE	FALSE
chr4	56338289	56387491	AASDH	0	-	67	64	minus	131	0.0114504	acp7_c1_rnaAligned	2.66249	0.861369	1	FALSE	AASDH_minus	FALSE	FALSE	FALSE	FALSE
chr4	56338289	56387491	AASDH	0	-	43	77	minus	120	-0.141667	acp7_c2_rnaAligned	2.43893	0.00244686	0.0315906	TRUE	AASDH_minus	FALSE	FALSE	FALSE	FALSE
chr4	56338289	56387491	AASDH	0	-	65	47	minus	112	0.0803571	acp7_c4_rnaAligned	2.27633	0.107782	0.439997	FALSE	AASDH_minus	FALSE	FALSE	FALSE	FALSE
chr11	106077661	106098695	AASDHPPT	0	+	11	15	plus	26	-0.0769231	acp6_c1_rnaAligned	1.23609	0.557197	0.890475	FALSE	AASDHPPT_plus	FALSE	FALSE	FALSE	FALSE
chr11	106077661	106098695	AASDHPPT	0	+	15	9	plus	24	0.125	acp6_c2_rnaAligned	1.14101	0.307456	0.698507	FALSE	AASDHPPT_plus	FALSE	FALSE	FALSE	FALSE
chr11	106077661	106098695	AASDHPPT	0	+	8	8	plus	16	0	acp6_c5_rnaAligned	0.760673	1	1	FALSE	AASDHPPT_plus	FALSE	FALSE	FALSE	FALSE
chr11	106077661	106098695	AASDHPPT	0	+	22	11	plus	33	0.166667	acp6_c6_rnaAligned	1.56889	0.0801433	0.35998	FALSE	AASDHPPT_plus	FALSE	FALSE	FALSE	FALSE
chr7	122073548	122144249	AASS	0	-	111	94	minus	205	0.0414634	acp6_c1_rnaAligned	2.89953	0.263738	0.64487	FALSE	AASS_minus	FALSE	FALSE	FALSE	FALSE
chr7	122073548	122144249	AASS	0	-	88	94	minus	182	-0.0164835	acp6_c2_rnaAligned	2.57422	0.711027	0.984049	FALSE	AASS_minus	FALSE	FALSE	FALSE	FALSE
chr7	122073548	122144249	AASS	0	-	85	85	minus	170	0	acp6_c5_rnaAligned	2.40449	1	1	FALSE	AASS_minus	FALSE	FALSE	FALSE	FALSE
chr7	122073548	122144249	AASS	0	-	91	90	minus	181	0.00276243	acp6_c6_rnaAligned	2.56008	1	1	FALSE	AASS_minus	FALSE	FALSE	FALSE	FALSE
chr7	122073548	122144249	AASS	0	-	70	78	minus	148	-0.027027	acp7_c1_rnaAligned	2.09332	0.565172	0.923929	FALSE	AASS_minus	FALSE	FALSE	FALSE	FALSE
chr7	122073548	122144249	AASS	0	-	51	71	minus	122	-0.0819672	acp7_c2_rnaAligned	1.72558	0.0849807	0.375092	FALSE	AASS_minus	FALSE	FALSE	FALSE	FALSE
chr7	122073548	122144249	AASS	0	-	62	73	minus	135	-0.0407407	acp7_c4_rnaAligned	1.90945	0.389503	0.794511	FALSE	AASS_minus	FALSE	FALSE	FALSE	FALSE
chr16	8674616	8784570	ABAT	0	+	60	45	plus	105	0.0714286	acp6_c1_rnaAligned	0.954945	0.171565	0.521829	FALSE	ABAT_plus	FALSE	FALSE	FALSE	FALSE
chr16	8674616	8784570	ABAT	0	+	44	45	plus	89	-0.005618	acp6_c2_rnaAligned	0.809429	1	1	FALSE	ABAT_plus	FALSE	FALSE	FALSE	FALSE
chr16	8674616	8784570	ABAT	0	+	45	38	plus	83	0.0421687	acp6_c5_rnaAligned	0.754861	0.51041	0.898692	FALSE	ABAT_plus	FALSE	FALSE	FALSE	FALSE
chr16	8674616	8784570	ABAT	0	+	37	44	plus	81	-0.0432099	acp6_c6_rnaAligned	0.736672	0.505236	0.869276	FALSE	ABAT_plus	FALSE	FALSE	FALSE	FALSE
chr16	8674616	8784570	ABAT	0	+	20	38	plus	58	-0.155172	acp7_c1_rnaAligned	0.527493	0.024746	0.18286	FALSE	ABAT_plus	FALSE	FALSE	FALSE	FALSE
chr16	8674616	8784570	ABAT	0	+	19	24	plus	43	-0.0581395	acp7_c2_rnaAligned	0.391073	0.542384	0.89608	FALSE	ABAT_plus	FALSE	FALSE	FALSE	FALSE
chr16	8674616	8784570	ABAT	0	+	38	30	plus	68	0.0588235	acp7_c4_rnaAligned	0.61844	0.396125	0.800036	FALSE	ABAT_plus	FALSE	FALSE	FALSE	FALSE
chr9	104781005	104928155	ABCA1	0	-	279	273	minus	552	0.00543478	acp6_c1_rnaAligned	3.75127	0.831496	1	FALSE	ABCA1_minus	FALSE	FALSE	FALSE	FALSE
chr9	104781005	104928155	ABCA1	0	-	584	562	minus	1146	0.0095986	acp6_c2_rnaAligned	7.78797	0.535055	0.891248	FALSE	ABCA1_minus	FALSE	FALSE	FALSE	FALSE
chr9	104781005	104928155	ABCA1	0	-	347	318	minus	665	0.0218045	acp6_c5_rnaAligned	4.5192	0.27756	0.70659	FALSE	ABCA1_minus	FALSE	FALSE	FALSE	FALSE
chr9	104781005	104928155	ABCA1	0	-	550	555	minus	1105	-0.0022624	acp6_c6_rnaAligned	7.50934	0.904228	1	FALSE	ABCA1_minus	FALSE	FALSE	FALSE	FALSE
chr9	104781005	104928155	ABCA1	0	-	89	73	minus	162	0.0493827	acp7_c1_rnaAligned	1.10092	0.238501	0.658809	FALSE	ABCA1_minus	FALSE	FALSE	FALSE	FALSE
chr9	104781005	104928155	ABCA1	0	-	48	37	minus	85	0.0647059	acp7_c2_rnaAligned	0.577642	0.277999	0.675391	FALSE	ABCA1_minus	FALSE	FALSE	FALSE	FALSE
chr9	104781005	104928155	ABCA1	0	-	39	66	minus	105	-0.128571	acp7_c4_rnaAligned	0.713558	0.0108179	0.0988193	FALSE	ABCA1_minus	FALSE	FALSE	FALSE	FALSE
chr17	69148006	69244848	ABCA10	0	-	6	7	minus	13	-0.0384615	acp6_c1_rnaAligned	0.134239	1	1	FALSE	ABCA10_minus	FALSE	FALSE	FALSE	FALSE
chr17	69148006	69244848	ABCA10	0	-	13	2	minus	15	0.366667	acp6_c2_rnaAligned	0.154891	0.00738525	0.0676041	FALSE	ABCA10_minus	TRUE	TRUE	FALSE	FALSE
chr17	69148006	69244848	ABCA10	0	-	17	5	minus	22	0.272727	acp6_c6_rnaAligned	0.227174	0.0169005	0.135172	FALSE	ABCA10_minus	TRUE	FALSE	FALSE	FALSE
chr7	48171457	48647497	ABCA13	0	+	9	2	plus	11	0.318182	acp7_c1_rnaAligned	0.0231073	0.0654297	0.338355	FALSE	ABCA13_plus	TRUE	TRUE	FALSE	FALSE
chr9	137007233	137028922	ABCA2	0	-	34	38	minus	72	-0.0277778	acp6_c1_rnaAligned	3.31966	0.723948	0.986173	FALSE	ABCA2_minus	FALSE	FALSE	FALSE	FALSE
chr9	137007233	137028922	ABCA2	0	-	41	28	minus	69	0.0942029	acp6_c2_rnaAligned	3.18134	0.148032	0.47782	FALSE	ABCA2_minus	FALSE	FALSE	FALSE	FALSE
chr9	137007233	137028922	ABCA2	0	-	22	36	minus	58	-0.12069	acp6_c5_rnaAligned	2.67417	0.0869489	0.391826	FALSE	ABCA2_minus	FALSE	FALSE	FALSE	FALSE
chr9	137007233	137028922	ABCA2	0	-	29	23	minus	52	0.0576923	acp6_c6_rnaAligned	2.39753	0.488456	0.857184	FALSE	ABCA2_minus	FALSE	FALSE	FALSE	FALSE
chr9	137007233	137028922	ABCA2	0	-	27	41	minus	68	-0.102941	acp7_c1_rnaAligned	3.13523	0.114254	0.464912	FALSE	ABCA2_minus	FALSE	FALSE	FALSE	FALSE
chr9	137007233	137028922	ABCA2	0	-	24	27	minus	51	-0.0294118	acp7_c2_rnaAligned	2.35142	0.779768	1	FALSE	ABCA2_minus	FALSE	FALSE	FALSE	FALSE
chr9	137007233	137028922	ABCA2	0	-	23	12	minus	35	0.157143	acp7_c4_rnaAligned	1.61372	0.0895311	0.396366	FALSE	ABCA2_minus	FALSE	FALSE	FALSE	FALSE
chr16	2275880	2340728	ABCA3	0	-	6	7	minus	13	-0.0384615	acp7_c1_rnaAligned	0.200469	1	1	FALSE	ABCA3_minus	FALSE	FALSE	FALSE	FALSE
chr1	93992833	94121148	ABCA4	0	-	4	6	minus	10	-0.1	acp6_c6_rnaAligned	0.0779332	0.753906	0.994678	FALSE	ABCA4_minus	FALSE	FALSE	FALSE	FALSE
chr17	69244310	69327133	ABCA5	0	-	74	60	minus	134	0.0522388	acp6_c1_rnaAligned	1.61791	0.26135	0.644048	FALSE	ABCA5_minus	FALSE	FALSE	FALSE	FALSE
chr17	69244310	69327133	ABCA5	0	-	86	68	minus	154	0.0584416	acp6_c2_rnaAligned	1.85939	0.170517	0.512998	FALSE	ABCA5_minus	FALSE	FALSE	FALSE	FALSE
chr17	69244310	69327133	ABCA5	0	-	27	36	minus	63	-0.0714286	acp6_c5_rnaAligned	0.760658	0.313503	0.744546	FALSE	ABCA5_minus	FALSE	FALSE	FALSE	FALSE
chr17	69244310	69327133	ABCA5	0	-	51	67	minus	118	-0.0677966	acp6_c6_rnaAligned	1.42473	0.167051	0.535215	FALSE	ABCA5_minus	FALSE	FALSE	FALSE	FALSE
chr17	69244310	69327133	ABCA5	0	-	12	12	minus	24	0	acp7_c1_rnaAligned	0.289775	1	1	FALSE	ABCA5_minus	FALSE	FALSE	FALSE	FALSE
chr17	69244310	69327133	ABCA5	0	-	25	12	minus	37	0.175676	acp7_c2_rnaAligned	0.446736	0.047031	0.263289	FALSE	ABCA5_minus	FALSE	FALSE	FALSE	FALSE
chr17	69244310	69327133	ABCA5	0	-	8	16	minus	24	-0.166667	acp7_c4_rnaAligned	0.289775	0.15159	0.520552	FALSE	ABCA5_minus	FALSE	FALSE	FALSE	FALSE
chr19	1040106	1065572	ABCA7	0	+	25	22	plus	47	0.0319149	acp7_c1_rnaAligned	1.8456	0.770867	1	FALSE	ABCA7_plus	FALSE	FALSE	FALSE	FALSE
chr19	1040106	1065572	ABCA7	0	+	11	5	plus	16	0.1875	acp7_c2_rnaAligned	0.628289	0.210114	0.591401	FALSE	ABCA7_plus	FALSE	FALSE	FALSE	FALSE
chr19	1040106	1065572	ABCA7	0	+	16	13	plus	29	0.0517241	acp7_c4_rnaAligned	1.13877	0.711071	0.996181	FALSE	ABCA7_plus	FALSE	FALSE	FALSE	FALSE
chr17	68867288	68955392	ABCA8	0	-	6	12	minus	18	-0.166667	acp6_c1_rnaAligned	0.204304	0.237885	0.612802	FALSE	ABCA8_minus	FALSE	FALSE	FALSE	FALSE
chr17	68867288	68955392	ABCA8	0	-	10	14	minus	24	-0.0833333	acp6_c6_rnaAligned	0.272405	0.541256	0.89401	FALSE	ABCA8_minus	FALSE	FALSE	FALSE	FALSE
chr17	68867288	68955392	ABCA8	0	-	11	21	minus	32	-0.15625	acp7_c1_rnaAligned	0.363207	0.110184	0.452776	FALSE	ABCA8_minus	FALSE	FALSE	FALSE	FALSE
chr17	68867288	68955392	ABCA8	0	-	20	15	minus	35	0.0714286	acp7_c2_rnaAligned	0.397258	0.49956	0.872028	FALSE	ABCA8_minus	FALSE	FALSE	FALSE	FALSE
chr17	68867288	68955392	ABCA8	0	-	24	13	minus	37	0.148649	acp7_c4_rnaAligned	0.419958	0.0988717	0.416997	FALSE	ABCA8_minus	FALSE	FALSE	FALSE	FALSE
chr1	229516581	229558707	ABCB10	0	-	33	51	minus	84	-0.107143	acp6_c1_rnaAligned	1.99402	0.0629723	0.295228	FALSE	ABCB10_minus	FALSE	FALSE	FALSE	FALSE
chr1	229516581	229558707	ABCB10	0	-	43	47	minus	90	-0.0222222	acp6_c2_rnaAligned	2.13645	0.752033	1	FALSE	ABCB10_minus	FALSE	FALSE	FALSE	FALSE
chr1	229516581	229558707	ABCB10	0	-	30	31	minus	61	-0.0081967	acp6_c5_rnaAligned	1.44804	1	1	FALSE	ABCB10_minus	FALSE	FALSE	FALSE	FALSE
chr1	229516581	229558707	ABCB10	0	-	50	42	minus	92	0.0434783	acp6_c6_rnaAligned	2.18392	0.465707	0.843234	FALSE	ABCB10_minus	FALSE	FALSE	FALSE	FALSE
chr1	229516581	229558707	ABCB10	0	-	88	79	minus	167	0.0269461	acp7_c1_rnaAligned	3.9643	0.536005	0.911631	FALSE	ABCB10_minus	FALSE	FALSE	FALSE	FALSE
chr1	229516581	229558707	ABCB10	0	-	81	87	minus	168	-0.0178571	acp7_c2_rnaAligned	3.98804	0.699797	0.984092	FALSE	ABCB10_minus	FALSE	FALSE	FALSE	FALSE
chr1	229516581	229558707	ABCB10	0	-	63	69	minus	132	-0.0227273	acp7_c4_rnaAligned	3.13346	0.663585	0.970288	FALSE	ABCB10_minus	FALSE	FALSE	FALSE	FALSE
chr2	168915389	169031324	ABCB11	0	-	3	5	minus	8	-0.125	acp7_c1_rnaAligned	0.0690042	0.726562	1	FALSE	ABCB11_minus	FALSE	FALSE	FALSE	FALSE
chr7	87401695	87476027	ABCB4	0	-	6	4	minus	10	0.1	acp6_c2_rnaAligned	0.134532	0.753906	1	FALSE	ABCB4_minus	FALSE	FALSE	FALSE	FALSE
chr7	87401695	87476027	ABCB4	0	-	11	2	minus	13	0.346154	acp6_c6_rnaAligned	0.174891	0.0224609	0.158203	FALSE	ABCB4_minus	TRUE	TRUE	FALSE	FALSE
chr7	87401695	87476027	ABCB4	0	-	15	5	minus	20	0.25	acp7_c1_rnaAligned	0.269063	0.0413895	0.254129	FALSE	ABCB4_minus	TRUE	FALSE	FALSE	FALSE
chr7	87401695	87476027	ABCB4	0	-	9	25	minus	34	-0.235294	acp7_c2_rnaAligned	0.457407	0.00904119	0.0850039	FALSE	ABCB4_minus	TRUE	FALSE	FALSE	FALSE
chr7	87401695	87476027	ABCB4	0	-	3	7	minus	10	-0.2	acp7_c4_rnaAligned	0.134532	0.34375	0.751888	FALSE	ABCB4_minus	FALSE	FALSE	FALSE	FALSE
chr2	219209771	219218958	ABCB6	0	-	33	10	minus	43	0.267442	acp6_c1_rnaAligned	4.68053	0.00060611	0.0085247	TRUE	ABCB6_minus	TRUE	FALSE	FALSE	FALSE
chr2	219209771	219218958	ABCB6	0	-	28	27	minus	55	0.00909091	acp6_c2_rnaAligned	5.98672	1	1	FALSE	ABCB6_minus	FALSE	FALSE	FALSE	FALSE
chr2	219209771	219218958	ABCB6	0	-	20	20	minus	40	0	acp6_c5_rnaAligned	4.35398	1	1	FALSE	ABCB6_minus	FALSE	FALSE	FALSE	FALSE
chr2	219209771	219218958	ABCB6	0	-	11	21	minus	32	-0.15625	acp6_c6_rnaAligned	3.48318	0.110184	0.42599	FALSE	ABCB6_minus	FALSE	FALSE	FALSE	FALSE
chr2	219209771	219218958	ABCB6	0	-	12	16	minus	28	-0.0714286	acp7_c1_rnaAligned	3.04778	0.571588	0.927043	FALSE	ABCB6_minus	FALSE	FALSE	FALSE	FALSE
chr2	219209771	219218958	ABCB6	0	-	10	10	minus	20	0	acp7_c2_rnaAligned	2.17699	1	1	FALSE	ABCB6_minus	FALSE	FALSE	FALSE	FALSE
chr2	219209771	219218958	ABCB6	0	-	10	9	minus	19	0.0263158	acp7_c4_rnaAligned	2.06814	1	1	FALSE	ABCB6_minus	FALSE	FALSE	FALSE	FALSE
chr12	122920947	122975114	ABCB9	0	-	14	6	minus	20	0.2	acp7_c1_rnaAligned	0.369229	0.115318	0.46525	FALSE	ABCB9_minus	FALSE	FALSE	FALSE	FALSE
chr12	122920947	122975114	ABCB9	0	-	14	4	minus	18	0.277778	acp7_c2_rnaAligned	0.332306	0.0308838	0.201292	FALSE	ABCB9_minus	TRUE	FALSE	FALSE	FALSE
chr12	122920947	122975114	ABCB9	0	-	14	12	minus	26	0.0384615	acp7_c4_rnaAligned	0.479997	0.845019	1	FALSE	ABCB9_minus	FALSE	FALSE	FALSE	FALSE
chr16	15949142	16143053	ABCC1	0	+	3	8	plus	11	-0.227273	acp6_c1_rnaAligned	0.0567271	0.226562	0.600361	FALSE	ABCC1_plus	TRUE	FALSE	FALSE	FALSE
chr16	15949142	16143053	ABCC1	0	+	11	11	plus	22	0	acp6_c2_rnaAligned	0.113454	1	1	FALSE	ABCC1_plus	FALSE	FALSE	FALSE	FALSE
chr16	15949142	16143053	ABCC1	0	+	6	8	plus	14	-0.0714286	acp6_c5_rnaAligned	0.0721981	0.790527	1	FALSE	ABCC1_plus	FALSE	FALSE	FALSE	FALSE
chr16	15949142	16143053	ABCC1	0	+	10	5	plus	15	0.166667	acp6_c6_rnaAligned	0.0773551	0.301758	0.708429	FALSE	ABCC1_plus	FALSE	FALSE	FALSE	FALSE
chr6	43427540	43451983	ABCC10	0	+	49	36	plus	85	0.0764706	acp6_c1_rnaAligned	3.47748	0.19276	0.554436	FALSE	ABCC10_plus	FALSE	FALSE	FALSE	FALSE
chr6	43427540	43451983	ABCC10	0	+	32	26	plus	58	0.0517241	acp6_c2_rnaAligned	2.37287	0.511842	0.875678	FALSE	ABCC10_plus	FALSE	FALSE	FALSE	FALSE
chr6	43427540	43451983	ABCC10	0	+	39	25	plus	64	0.109375	acp6_c5_rnaAligned	2.61834	0.103422	0.43103	FALSE	ABCC10_plus	FALSE	FALSE	FALSE	FALSE
chr6	43427540	43451983	ABCC10	0	+	47	44	plus	91	0.0164835	acp6_c6_rnaAligned	3.72295	0.834081	1	FALSE	ABCC10_plus	FALSE	FALSE	FALSE	FALSE
chr6	43427540	43451983	ABCC10	0	+	25	17	plus	42	0.0952381	acp7_c1_rnaAligned	1.71828	0.279956	0.714066	FALSE	ABCC10_plus	FALSE	FALSE	FALSE	FALSE
chr6	43427540	43451983	ABCC10	0	+	16	23	plus	39	-0.0897436	acp7_c2_rnaAligned	1.59555	0.336784	0.73405	FALSE	ABCC10_plus	FALSE	FALSE	FALSE	FALSE
chr6	43427540	43451983	ABCC10	0	+	11	18	plus	29	-0.12069	acp7_c4_rnaAligned	1.18643	0.264931	0.675333	FALSE	ABCC10_plus	FALSE	FALSE	FALSE	FALSE
chr10	99782639	99852594	ABCC2	0	+	4	4	plus	8	0	acp7_c4_rnaAligned	0.114359	1	1	FALSE	ABCC2_plus	FALSE	FALSE	FALSE	FALSE
chr17	50634880	50692253	ABCC3	0	+	20	30	plus	50	-0.1	acp6_c1_rnaAligned	0.87149	0.202639	0.567036	FALSE	ABCC3_plus	FALSE	FALSE	FALSE	FALSE
chr17	50634880	50692253	ABCC3	0	+	51	43	plus	94	0.0425532	acp6_c2_rnaAligned	1.6384	0.470492	0.843231	FALSE	ABCC3_plus	FALSE	FALSE	FALSE	FALSE
chr17	50634880	50692253	ABCC3	0	+	26	19	plus	45	0.0777778	acp6_c5_rnaAligned	0.784341	0.371298	0.794058	FALSE	ABCC3_plus	FALSE	FALSE	FALSE	FALSE
chr17	50634880	50692253	ABCC3	0	+	17	14	plus	31	0.0483871	acp6_c6_rnaAligned	0.540324	0.7201	0.984174	FALSE	ABCC3_plus	FALSE	FALSE	FALSE	FALSE
chr17	50634880	50692253	ABCC3	0	+	83	72	plus	155	0.0354839	acp7_c1_rnaAligned	2.70162	0.421939	0.836713	FALSE	ABCC3_plus	FALSE	FALSE	FALSE	FALSE
chr17	50634880	50692253	ABCC3	0	+	60	30	plus	90	0.166667	acp7_c2_rnaAligned	1.56868	0.00206027	0.0278894	TRUE	ABCC3_plus	FALSE	FALSE	FALSE	FALSE
chr17	50634880	50692253	ABCC3	0	+	77	77	plus	154	0	acp7_c4_rnaAligned	2.68419	1	1	FALSE	ABCC3_plus	FALSE	FALSE	FALSE	FALSE
chr13	95019834	95301451	ABCC4	0	-	243	492	minus	735	-0.169388	acp6_c1_rnaAligned	2.60993	2.53e-20	2.14e-18	TRUE	ABCC4_minus	FALSE	FALSE	FALSE	FALSE
chr13	95019834	95301451	ABCC4	0	-	294	428	minus	722	-0.0927978	acp6_c2_rnaAligned	2.56377	6.93e-07	2.08e-05	TRUE	ABCC4_minus	FALSE	FALSE	FALSE	FALSE
chr13	95019834	95301451	ABCC4	0	-	307	505	minus	812	-0.121921	acp6_c5_rnaAligned	2.88335	3.72e-12	2.65e-10	TRUE	ABCC4_minus	FALSE	FALSE	FALSE	FALSE
chr13	95019834	95301451	ABCC4	0	-	506	762	minus	1268	-0.100946	acp6_c6_rnaAligned	4.50257	6.71e-13	4.37e-11	TRUE	ABCC4_minus	FALSE	FALSE	FALSE	FALSE
chr13	95019834	95301451	ABCC4	0	-	138	212	minus	350	-0.105714	acp7_c1_rnaAligned	1.24282	9.02e-05	0.00227596	TRUE	ABCC4_minus	FALSE	FALSE	FALSE	FALSE
chr13	95019834	95301451	ABCC4	0	-	107	162	minus	269	-0.102231	acp7_c2_rnaAligned	0.955198	0.00095785	0.0155699	TRUE	ABCC4_minus	FALSE	FALSE	FALSE	FALSE
chr13	95019834	95301451	ABCC4	0	-	158	213	minus	371	-0.074124	acp7_c4_rnaAligned	1.31739	0.00498669	0.0555139	FALSE	ABCC4_minus	FALSE	FALSE	FALSE	FALSE
chr3	183919933	184017884	ABCC5	0	-	201	207	minus	408	-0.0073529	acp6_c1_rnaAligned	4.16535	0.80453	1	FALSE	ABCC5_minus	FALSE	FALSE	FALSE	FALSE
chr3	183919933	184017884	ABCC5	0	-	200	176	minus	376	0.0319149	acp6_c2_rnaAligned	3.83865	0.235527	0.608576	FALSE	ABCC5_minus	FALSE	FALSE	FALSE	FALSE
chr3	183919933	184017884	ABCC5	0	-	161	167	minus	328	-0.0091463	acp6_c5_rnaAligned	3.34861	0.782538	1	FALSE	ABCC5_minus	FALSE	FALSE	FALSE	FALSE
chr3	183919933	184017884	ABCC5	0	-	170	182	minus	352	-0.0170455	acp6_c6_rnaAligned	3.59363	0.557734	0.901	FALSE	ABCC5_minus	FALSE	FALSE	FALSE	FALSE
chr3	183919933	184017884	ABCC5	0	-	128	144	minus	272	-0.0294118	acp7_c1_rnaAligned	2.7769	0.363108	0.78668	FALSE	ABCC5_minus	FALSE	FALSE	FALSE	FALSE
chr3	183919933	184017884	ABCC5	0	-	142	137	minus	279	0.00896057	acp7_c2_rnaAligned	2.84836	0.810791	1	FALSE	ABCC5_minus	FALSE	FALSE	FALSE	FALSE
chr3	183919933	184017884	ABCC5	0	-	153	162	minus	315	-0.0142857	acp7_c4_rnaAligned	3.21589	0.652239	0.963414	FALSE	ABCC5_minus	FALSE	FALSE	FALSE	FALSE
chr12	21797388	21941426	ABCC9	0	-	31	30	minus	61	0.00819672	acp6_c1_rnaAligned	0.423499	1	1	FALSE	ABCC9_minus	FALSE	FALSE	FALSE	FALSE
chr12	21797388	21941426	ABCC9	0	-	101	102	minus	203	-0.0024631	acp6_c2_rnaAligned	1.40935	1	1	FALSE	ABCC9_minus	FALSE	FALSE	FALSE	FALSE
chr12	21797388	21941426	ABCC9	0	-	43	57	minus	100	-0.07	acp6_c5_rnaAligned	0.694261	0.193348	0.598287	FALSE	ABCC9_minus	FALSE	FALSE	FALSE	FALSE
chr12	21797388	21941426	ABCC9	0	-	50	44	minus	94	0.0319149	acp6_c6_rnaAligned	0.652606	0.606296	0.926526	FALSE	ABCC9_minus	FALSE	FALSE	FALSE	FALSE
chr12	21797388	21941426	ABCC9	0	-	26	13	minus	39	0.166667	acp7_c1_rnaAligned	0.270762	0.0532519	0.301282	FALSE	ABCC9_minus	FALSE	FALSE	FALSE	FALSE
chr12	21797388	21941426	ABCC9	0	-	8	11	minus	19	-0.0789474	acp7_c2_rnaAligned	0.13191	0.647606	0.949705	FALSE	ABCC9_minus	FALSE	FALSE	FALSE	FALSE
chr12	21797388	21941426	ABCC9	0	-	16	13	minus	29	0.0517241	acp7_c4_rnaAligned	0.201336	0.711071	0.996181	FALSE	ABCC9_minus	FALSE	FALSE	FALSE	FALSE
chr1	94385130	94518663	ABCD3	0	+	98	82	plus	180	0.0444444	acp7_c1_rnaAligned	1.34798	0.263499	0.694963	FALSE	ABCD3_plus	FALSE	FALSE	FALSE	FALSE
chr1	94385130	94518663	ABCD3	0	+	79	77	plus	156	0.00641026	acp7_c2_rnaAligned	1.16825	0.93622	1	FALSE	ABCD3_plus	FALSE	FALSE	FALSE	FALSE
chr1	94385130	94518663	ABCD3	0	+	82	72	plus	154	0.0324675	acp7_c4_rnaAligned	1.15327	0.468421	0.860943	FALSE	ABCD3_plus	FALSE	FALSE	FALSE	FALSE
chr14	74285268	74302934	ABCD4	0	-	18	20	minus	38	-0.0263158	acp7_c1_rnaAligned	2.15102	0.871415	1	FALSE	ABCD4_minus	FALSE	FALSE	FALSE	FALSE
chr14	74285268	74302934	ABCD4	0	-	22	12	minus	34	0.147059	acp7_c2_rnaAligned	1.9246	0.121449	0.453894	FALSE	ABCD4_minus	FALSE	FALSE	FALSE	FALSE
chr14	74285268	74302934	ABCD4	0	-	23	23	minus	46	0	acp7_c4_rnaAligned	2.60387	1	1	FALSE	ABCD4_minus	FALSE	FALSE	FALSE	FALSE
chr4	145098310	145129524	ABCE1	0	+	6	4	plus	10	0.1	acp6_c5_rnaAligned	0.320369	0.753906	0.997325	FALSE	ABCE1_plus	FALSE	FALSE	FALSE	FALSE
chr4	145098310	145129524	ABCE1	0	+	7	7	plus	14	0	acp6_c6_rnaAligned	0.448517	1	1	FALSE	ABCE1_plus	FALSE	FALSE	FALSE	FALSE
chr4	145098310	145129524	ABCE1	0	+	8	13	plus	21	-0.119048	acp7_c1_rnaAligned	0.672775	0.38331	0.803768	FALSE	ABCE1_plus	FALSE	FALSE	FALSE	FALSE
chr4	145098310	145129524	ABCE1	0	+	8	4	plus	12	0.166667	acp7_c2_rnaAligned	0.384443	0.387695	0.774473	FALSE	ABCE1_plus	FALSE	FALSE	FALSE	FALSE
chr4	145098310	145129524	ABCE1	0	+	8	8	plus	16	0	acp7_c4_rnaAligned	0.51259	1	1	FALSE	ABCE1_plus	FALSE	FALSE	FALSE	FALSE
chr7	151211483	151227205	ABCF2	0	-	244	282	minus	526	-0.0361217	acp7_c1_rnaAligned	33.4563	0.106595	0.447414	FALSE	ABCF2_minus	FALSE	FALSE	FALSE	FALSE
chr7	151211483	151227205	ABCF2	0	-	178	176	minus	354	0.00282486	acp7_c2_rnaAligned	22.5162	0.957623	1	FALSE	ABCF2_minus	FALSE	FALSE	FALSE	FALSE
chr7	151211483	151227205	ABCF2	0	-	185	174	minus	359	0.0153203	acp7_c4_rnaAligned	22.8342	0.597714	0.933479	FALSE	ABCF2_minus	FALSE	FALSE	FALSE	FALSE
chr7	151207836	151227205	ABCF2-H2BK1	0	-	254	291	minus	545	-0.033945	acp7_c1_rnaAligned	28.1377	0.122978	0.482416	FALSE	ABCF2-H2BK1_minus	FALSE	FALSE	FALSE	FALSE
chr7	151207836	151227205	ABCF2-H2BK1	0	-	182	183	minus	365	-0.0013699	acp7_c2_rnaAligned	18.8445	1	1	FALSE	ABCF2-H2BK1_minus	FALSE	FALSE	FALSE	FALSE
chr7	151207836	151227205	ABCF2-H2BK1	0	-	189	175	minus	364	0.0192308	acp7_c4_rnaAligned	18.7929	0.495681	0.880867	FALSE	ABCF2-H2BK1_minus	FALSE	FALSE	FALSE	FALSE
chr3	184186198	184194005	ABCF3	0	+	15	16	plus	31	-0.016129	acp6_c1_rnaAligned	3.9708	1	1	FALSE	ABCF3_plus	FALSE	FALSE	FALSE	FALSE
chr3	184186198	184194005	ABCF3	0	+	20	4	plus	24	0.333333	acp6_c2_rnaAligned	3.07416	0.00154388	0.0202871	TRUE	ABCF3_plus	TRUE	TRUE	FALSE	FALSE
chr3	184186198	184194005	ABCF3	0	+	11	12	plus	23	-0.0217391	acp6_c5_rnaAligned	2.94607	1	1	FALSE	ABCF3_plus	FALSE	FALSE	FALSE	FALSE
chr3	184186198	184194005	ABCF3	0	+	14	18	plus	32	-0.0625	acp6_c6_rnaAligned	4.09889	0.596615	0.923715	FALSE	ABCF3_plus	FALSE	FALSE	FALSE	FALSE
chr3	184186198	184194005	ABCF3	0	+	46	39	plus	85	0.0411765	acp7_c1_rnaAligned	10.8877	0.515426	0.896541	FALSE	ABCF3_plus	FALSE	FALSE	FALSE	FALSE
chr3	184186198	184194005	ABCF3	0	+	31	26	plus	57	0.0438597	acp7_c2_rnaAligned	7.30114	0.596642	0.922499	FALSE	ABCF3_plus	FALSE	FALSE	FALSE	FALSE
chr3	184186198	184194005	ABCF3	0	+	36	24	plus	60	0.1	acp7_c4_rnaAligned	7.68541	0.155002	0.524545	FALSE	ABCF3_plus	FALSE	FALSE	FALSE	FALSE
chr3	111979025	111993368	ABHD10	0	+	11	15	plus	26	-0.0769231	acp6_c1_rnaAligned	1.81273	0.557197	0.890475	FALSE	ABHD10_plus	FALSE	FALSE	FALSE	FALSE
chr3	111979025	111993368	ABHD10	0	+	7	18	plus	25	-0.22	acp6_c2_rnaAligned	1.74301	0.0432852	0.230336	FALSE	ABHD10_plus	TRUE	FALSE	FALSE	FALSE
chr3	111979025	111993368	ABHD10	0	+	13	5	plus	18	0.222222	acp6_c5_rnaAligned	1.25497	0.0962524	0.411017	FALSE	ABHD10_plus	TRUE	FALSE	FALSE	FALSE
chr3	111979025	111993368	ABHD10	0	+	12	13	plus	25	-0.02	acp6_c6_rnaAligned	1.74301	1	1	FALSE	ABHD10_plus	FALSE	FALSE	FALSE	FALSE
chr20	25294742	25390835	ABHD12	0	-	294	235	minus	529	0.0557656	acp6_c1_rnaAligned	5.50508	0.0116069	0.0930979	FALSE	ABHD12_minus	FALSE	FALSE	FALSE	FALSE
chr20	25294742	25390835	ABHD12	0	-	245	223	minus	468	0.0235043	acp6_c2_rnaAligned	4.87028	0.33169	0.724845	FALSE	ABHD12_minus	FALSE	FALSE	FALSE	FALSE
chr20	25294742	25390835	ABHD12	0	-	245	219	minus	464	0.0280172	acp6_c5_rnaAligned	4.82866	0.245777	0.66877	FALSE	ABHD12_minus	FALSE	FALSE	FALSE	FALSE
chr20	25294742	25390835	ABHD12	0	-	280	229	minus	509	0.0500982	acp6_c6_rnaAligned	5.29695	0.0265797	0.176972	FALSE	ABHD12_minus	FALSE	FALSE	FALSE	FALSE
chr20	25294742	25390835	ABHD12	0	-	217	206	minus	423	0.0130024	acp7_c1_rnaAligned	4.40199	0.626866	0.956015	FALSE	ABHD12_minus	FALSE	FALSE	FALSE	FALSE
chr20	25294742	25390835	ABHD12	0	-	187	198	minus	385	-0.0142857	acp7_c2_rnaAligned	4.00654	0.610356	0.927508	FALSE	ABHD12_minus	FALSE	FALSE	FALSE	FALSE
chr20	25294742	25390835	ABHD12	0	-	196	179	minus	375	0.0226667	acp7_c4_rnaAligned	3.90247	0.408703	0.811506	FALSE	ABHD12_minus	FALSE	FALSE	FALSE	FALSE
chr13	108218391	108234243	ABHD13	0	+	52	58	plus	110	-0.0272727	acp6_c1_rnaAligned	6.93919	0.633756	0.933974	FALSE	ABHD13_plus	FALSE	FALSE	FALSE	FALSE
chr13	108218391	108234243	ABHD13	0	+	69	65	plus	134	0.0149254	acp6_c2_rnaAligned	8.45319	0.795629	1	FALSE	ABHD13_plus	FALSE	FALSE	FALSE	FALSE
chr13	108218391	108234243	ABHD13	0	+	38	44	plus	82	-0.0365854	acp6_c5_rnaAligned	5.17285	0.581114	0.929735	FALSE	ABHD13_plus	FALSE	FALSE	FALSE	FALSE
chr13	108218391	108234243	ABHD13	0	+	50	68	plus	118	-0.0762712	acp6_c6_rnaAligned	7.44386	0.117213	0.442292	FALSE	ABHD13_plus	FALSE	FALSE	FALSE	FALSE
chr13	108218391	108234243	ABHD13	0	+	62	58	plus	120	0.0166667	acp7_c1_rnaAligned	7.57002	0.784328	1	FALSE	ABHD13_plus	FALSE	FALSE	FALSE	FALSE
chr13	108218391	108234243	ABHD13	0	+	49	54	plus	103	-0.0242718	acp7_c2_rnaAligned	6.4976	0.693686	0.980691	FALSE	ABHD13_plus	FALSE	FALSE	FALSE	FALSE
chr13	108218391	108234243	ABHD13	0	+	40	37	plus	77	0.0194805	acp7_c4_rnaAligned	4.85743	0.819893	1	FALSE	ABHD13_plus	FALSE	FALSE	FALSE	FALSE
chr3	51975063	51981196	ABHD14A	0	+	6	3	plus	9	0.166667	acp7_c4_rnaAligned	1.46747	0.507812	0.880867	FALSE	ABHD14A_plus	FALSE	FALSE	FALSE	FALSE
chr3	51975063	51989197	ABHD14A-ACY1	0	+	6	3	plus	9	0.166667	acp7_c4_rnaAligned	0.636762	0.507812	0.880867	FALSE	ABHD14A-ACY1_plus	FALSE	FALSE	FALSE	FALSE
chr17	29560546	29567037	ABHD15	0	-	35	14	minus	49	0.214286	acp6_c1_rnaAligned	7.54891	0.00380165	0.0399795	TRUE	ABHD15_minus	TRUE	FALSE	FALSE	FALSE
chr17	29560546	29567037	ABHD15	0	-	22	6	minus	28	0.285714	acp6_c2_rnaAligned	4.31367	0.00371917	0.0401325	TRUE	ABHD15_minus	TRUE	FALSE	FALSE	FALSE
chr17	29560546	29567037	ABHD15	0	-	27	9	minus	36	0.25	acp6_c5_rnaAligned	5.54614	0.00393317	0.0493096	TRUE	ABHD15_minus	TRUE	FALSE	FALSE	FALSE
chr17	29560546	29567037	ABHD15	0	-	31	9	minus	40	0.275	acp6_c6_rnaAligned	6.16238	0.00067955	0.0112966	TRUE	ABHD15_minus	TRUE	FALSE	FALSE	FALSE
chr17	29560546	29567037	ABHD15	0	-	43	55	minus	98	-0.0612245	acp7_c1_rnaAligned	15.0978	0.266406	0.695731	FALSE	ABHD15_minus	FALSE	FALSE	FALSE	FALSE
chr17	29560546	29567037	ABHD15	0	-	37	36	minus	73	0.00684932	acp7_c2_rnaAligned	11.2463	1	1	FALSE	ABHD15_minus	FALSE	FALSE	FALSE	FALSE
chr17	29560546	29567037	ABHD15	0	-	45	36	minus	81	0.0555556	acp7_c4_rnaAligned	12.4788	0.374174	0.784875	FALSE	ABHD15_minus	FALSE	FALSE	FALSE	FALSE
chr19	1876809	1885496	ABHD17A	0	-	9	2	minus	11	0.318182	acp6_c1_rnaAligned	1.26626	0.0654297	0.299591	FALSE	ABHD17A_minus	TRUE	TRUE	FALSE	FALSE
chr19	1876809	1885496	ABHD17A	0	-	4	6	minus	10	-0.1	acp6_c2_rnaAligned	1.15115	0.753906	1	FALSE	ABHD17A_minus	FALSE	FALSE	FALSE	FALSE
chr19	1876809	1885496	ABHD17A	0	-	5	8	minus	13	-0.115385	acp6_c5_rnaAligned	1.49649	0.581055	0.929735	FALSE	ABHD17A_minus	FALSE	FALSE	FALSE	FALSE
chr19	1876809	1885496	ABHD17A	0	-	7	7	minus	14	0	acp6_c6_rnaAligned	1.6116	1	1	FALSE	ABHD17A_minus	FALSE	FALSE	FALSE	FALSE
chr9	71862451	71911193	ABHD17B	0	-	8	6	minus	14	0.0714286	acp7_c2_rnaAligned	0.287227	0.790527	1	FALSE	ABHD17B_minus	FALSE	FALSE	FALSE	FALSE
chr15	80695309	80755621	ABHD17C	0	+	34	47	plus	81	-0.0802469	acp6_c1_rnaAligned	1.34302	0.182077	0.540515	FALSE	ABHD17C_plus	FALSE	FALSE	FALSE	FALSE
chr15	80695309	80755621	ABHD17C	0	+	45	62	plus	107	-0.0794393	acp6_c2_rnaAligned	1.77411	0.121512	0.425241	FALSE	ABHD17C_plus	FALSE	FALSE	FALSE	FALSE
chr15	80695309	80755621	ABHD17C	0	+	42	39	plus	81	0.0185185	acp6_c5_rnaAligned	1.34302	0.824313	1	FALSE	ABHD17C_plus	FALSE	FALSE	FALSE	FALSE
chr15	80695309	80755621	ABHD17C	0	+	72	67	plus	139	0.0179856	acp6_c6_rnaAligned	2.30468	0.734539	0.991816	FALSE	ABHD17C_plus	FALSE	FALSE	FALSE	FALSE
chr15	80695309	80755621	ABHD17C	0	+	37	50	plus	87	-0.0747126	acp7_c1_rnaAligned	1.4425	0.197979	0.605542	FALSE	ABHD17C_plus	FALSE	FALSE	FALSE	FALSE
chr15	80695309	80755621	ABHD17C	0	+	49	48	plus	97	0.00515464	acp7_c2_rnaAligned	1.6083	1	1	FALSE	ABHD17C_plus	FALSE	FALSE	FALSE	FALSE
chr15	80695309	80755621	ABHD17C	0	+	46	35	plus	81	0.0679012	acp7_c4_rnaAligned	1.34302	0.266412	0.675333	FALSE	ABHD17C_plus	FALSE	FALSE	FALSE	FALSE
chr4	127965405	128039953	ABHD18	0	+	10	10	plus	20	0	acp6_c1_rnaAligned	0.268284	1	1	FALSE	ABHD18_plus	FALSE	FALSE	FALSE	FALSE
chr4	127965405	128039953	ABHD18	0	+	14	12	plus	26	0.0384615	acp6_c2_rnaAligned	0.348769	0.845019	1	FALSE	ABHD18_plus	FALSE	FALSE	FALSE	FALSE
chr4	127965405	128039953	ABHD18	0	+	14	3	plus	17	0.323529	acp6_c5_rnaAligned	0.228041	0.0127258	0.116985	FALSE	ABHD18_plus	TRUE	TRUE	FALSE	FALSE
chr4	127965405	128039953	ABHD18	0	+	14	14	plus	28	0	acp6_c6_rnaAligned	0.375597	1	1	FALSE	ABHD18_plus	FALSE	FALSE	FALSE	FALSE
chr4	127965405	128039953	ABHD18	0	+	10	4	plus	14	0.214286	acp7_c1_rnaAligned	0.187798	0.179565	0.572932	FALSE	ABHD18_plus	TRUE	FALSE	FALSE	FALSE
chr4	127965405	128039953	ABHD18	0	+	6	7	plus	13	-0.0384615	acp7_c2_rnaAligned	0.174384	1	1	FALSE	ABHD18_plus	FALSE	FALSE	FALSE	FALSE
chr4	127965405	128039953	ABHD18	0	+	2	6	plus	8	-0.25	acp7_c4_rnaAligned	0.107313	0.289062	0.697154	FALSE	ABHD18_plus	TRUE	FALSE	FALSE	FALSE
chr15	89040997	89202355	ABHD2	0	+	21	41	plus	62	-0.16129	acp6_c1_rnaAligned	0.384239	0.0151341	0.112112	FALSE	ABHD2_plus	FALSE	FALSE	FALSE	FALSE
chr15	89040997	89202355	ABHD2	0	+	65	38	plus	103	0.131068	acp6_c2_rnaAligned	0.638332	0.0100633	0.0848716	FALSE	ABHD2_plus	FALSE	FALSE	FALSE	FALSE
chr15	89040997	89202355	ABHD2	0	+	45	49	plus	94	-0.0212766	acp6_c5_rnaAligned	0.582556	0.757189	0.998229	FALSE	ABHD2_plus	FALSE	FALSE	FALSE	FALSE
chr15	89040997	89202355	ABHD2	0	+	67	59	plus	126	0.031746	acp6_c6_rnaAligned	0.780872	0.533053	0.891334	FALSE	ABHD2_plus	FALSE	FALSE	FALSE	FALSE
chr15	89040997	89202355	ABHD2	0	+	177	151	plus	328	0.0396341	acp7_c1_rnaAligned	2.03275	0.167368	0.563512	FALSE	ABHD2_plus	FALSE	FALSE	FALSE	FALSE
chr15	89040997	89202355	ABHD2	0	+	166	207	plus	373	-0.0549598	acp7_c2_rnaAligned	2.31163	0.038205	0.232533	FALSE	ABHD2_plus	FALSE	FALSE	FALSE	FALSE
chr15	89040997	89202355	ABHD2	0	+	174	162	plus	336	0.0178571	acp7_c4_rnaAligned	2.08233	0.548504	0.905841	FALSE	ABHD2_plus	FALSE	FALSE	FALSE	FALSE
chr18	21650900	21704774	ABHD3	0	-	9	10	minus	19	-0.0263158	acp6_c1_rnaAligned	0.352675	1	1	FALSE	ABHD3_minus	FALSE	FALSE	FALSE	FALSE
chr18	21650900	21704774	ABHD3	0	-	13	2	minus	15	0.366667	acp6_c2_rnaAligned	0.278427	0.00738525	0.0676041	FALSE	ABHD3_minus	TRUE	TRUE	FALSE	FALSE
chr18	21650900	21704774	ABHD3	0	-	13	7	minus	20	0.15	acp6_c5_rnaAligned	0.371237	0.263176	0.688501	FALSE	ABHD3_minus	FALSE	FALSE	FALSE	FALSE
chr18	21650900	21704774	ABHD3	0	-	8	8	minus	16	0	acp6_c6_rnaAligned	0.296989	1	1	FALSE	ABHD3_minus	FALSE	FALSE	FALSE	FALSE
chr14	22598299	22612963	ABHD4	0	+	28	29	plus	57	-0.0087719	acp6_c1_rnaAligned	3.88707	1	1	FALSE	ABHD4_plus	FALSE	FALSE	FALSE	FALSE
chr14	22598299	22612963	ABHD4	0	+	38	45	plus	83	-0.0421687	acp6_c2_rnaAligned	5.66012	0.51041	0.875615	FALSE	ABHD4_plus	FALSE	FALSE	FALSE	FALSE
chr14	22598299	22612963	ABHD4	0	+	23	25	plus	48	-0.0208333	acp6_c5_rnaAligned	3.27332	0.885433	1	FALSE	ABHD4_plus	FALSE	FALSE	FALSE	FALSE
chr14	22598299	22612963	ABHD4	0	+	49	33	plus	82	0.097561	acp6_c6_rnaAligned	5.59193	0.0970309	0.398444	FALSE	ABHD4_plus	FALSE	FALSE	FALSE	FALSE
chr14	22598299	22612963	ABHD4	0	+	45	28	plus	73	0.116438	acp7_c1_rnaAligned	4.97818	0.06037	0.324128	FALSE	ABHD4_plus	FALSE	FALSE	FALSE	FALSE
chr14	22598299	22612963	ABHD4	0	+	31	52	plus	83	-0.126506	acp7_c2_rnaAligned	5.66012	0.0275342	0.187145	FALSE	ABHD4_plus	FALSE	FALSE	FALSE	FALSE
chr14	22598299	22612963	ABHD4	0	+	61	54	plus	115	0.0304348	acp7_c4_rnaAligned	7.84233	0.576012	0.923748	FALSE	ABHD4_plus	FALSE	FALSE	FALSE	FALSE
chr3	43690869	43734371	ABHD5	0	+	6	8	plus	14	-0.0714286	acp6_c1_rnaAligned	0.321824	0.790527	1	FALSE	ABHD5_plus	FALSE	FALSE	FALSE	FALSE
chr3	43690869	43734371	ABHD5	0	+	5	14	plus	19	-0.236842	acp6_c2_rnaAligned	0.436762	0.0635681	0.29543	FALSE	ABHD5_plus	TRUE	FALSE	FALSE	FALSE
chr3	43690869	43734371	ABHD5	0	+	9	2	plus	11	0.318182	acp6_c6_rnaAligned	0.252862	0.0654297	0.318947	FALSE	ABHD5_plus	TRUE	TRUE	FALSE	FALSE
chr3	43690869	43734371	ABHD5	0	+	8	14	plus	22	-0.136364	acp7_c1_rnaAligned	0.505724	0.286279	0.714066	FALSE	ABHD5_plus	FALSE	FALSE	FALSE	FALSE
chr3	43690869	43734371	ABHD5	0	+	12	42	plus	54	-0.277778	acp7_c2_rnaAligned	1.24132	5.21e-05	0.00124765	TRUE	ABHD5_plus	TRUE	FALSE	FALSE	FALSE
chr3	43690869	43734371	ABHD5	0	+	6	10	plus	16	-0.125	acp7_c4_rnaAligned	0.367799	0.454498	0.846937	FALSE	ABHD5_plus	FALSE	FALSE	FALSE	FALSE
chr3	58237791	58294734	ABHD6	0	+	94	83	plus	177	0.0310734	acp6_c1_rnaAligned	3.10837	0.452358	0.818911	FALSE	ABHD6_plus	FALSE	FALSE	FALSE	FALSE
chr3	58237791	58294734	ABHD6	0	+	72	85	plus	157	-0.0414013	acp6_c2_rnaAligned	2.75714	0.338235	0.731825	FALSE	ABHD6_plus	FALSE	FALSE	FALSE	FALSE
chr3	58237791	58294734	ABHD6	0	+	95	93	plus	188	0.00531915	acp6_c5_rnaAligned	3.30155	0.941886	1	FALSE	ABHD6_plus	FALSE	FALSE	FALSE	FALSE
chr3	58237791	58294734	ABHD6	0	+	74	109	plus	183	-0.0956284	acp6_c6_rnaAligned	3.21374	0.0117518	0.104627	FALSE	ABHD6_plus	FALSE	FALSE	FALSE	FALSE
chr3	58237791	58294734	ABHD6	0	+	74	59	plus	133	0.056391	acp7_c1_rnaAligned	2.33567	0.22463	0.643857	FALSE	ABHD6_plus	FALSE	FALSE	FALSE	FALSE
chr3	58237791	58294734	ABHD6	0	+	89	68	plus	157	0.066879	acp7_c2_rnaAligned	2.75714	0.110157	0.431098	FALSE	ABHD6_plus	FALSE	FALSE	FALSE	FALSE
chr3	58237791	58294734	ABHD6	0	+	51	47	plus	98	0.0204082	acp7_c4_rnaAligned	1.72102	0.762036	1	FALSE	ABHD6_plus	FALSE	FALSE	FALSE	FALSE
chr19	17292130	17303425	ABHD8	0	-	8	7	minus	15	0.0333333	acp6_c1_rnaAligned	1.32802	1	1	FALSE	ABHD8_minus	FALSE	FALSE	FALSE	FALSE
chr19	17292130	17303425	ABHD8	0	-	14	18	minus	32	-0.0625	acp6_c2_rnaAligned	2.83311	0.596615	0.918947	FALSE	ABHD8_minus	FALSE	FALSE	FALSE	FALSE
chr19	17292130	17303425	ABHD8	0	-	22	17	minus	39	0.0641026	acp6_c5_rnaAligned	3.45286	0.522397	0.906995	FALSE	ABHD8_minus	FALSE	FALSE	FALSE	FALSE
chr19	17292130	17303425	ABHD8	0	-	17	19	minus	36	-0.0277778	acp6_c6_rnaAligned	3.18725	0.867939	1	FALSE	ABHD8_minus	FALSE	FALSE	FALSE	FALSE
chr19	17292130	17303425	ABHD8	0	-	6	10	minus	16	-0.125	acp7_c1_rnaAligned	1.41656	0.454498	0.860381	FALSE	ABHD8_minus	FALSE	FALSE	FALSE	FALSE
chr19	17292130	17303425	ABHD8	0	-	7	7	minus	14	0	acp7_c2_rnaAligned	1.23949	1	1	FALSE	ABHD8_minus	FALSE	FALSE	FALSE	FALSE
chr19	17292130	17303425	ABHD8	0	-	11	14	minus	25	-0.06	acp7_c4_rnaAligned	2.21337	0.690038	0.984934	FALSE	ABHD8_minus	FALSE	FALSE	FALSE	FALSE
chr10	26746595	26860958	ABI1	0	-	10	20	minus	30	-0.166667	acp7_c1_rnaAligned	0.262323	0.0987371	0.425236	FALSE	ABI1_minus	FALSE	FALSE	FALSE	FALSE
chr10	26746595	26860958	ABI1	0	-	15	15	minus	30	0	acp7_c2_rnaAligned	0.262323	1	1	FALSE	ABI1_minus	FALSE	FALSE	FALSE	FALSE
chr10	26746595	26860958	ABI1	0	-	14	16	minus	30	-0.0333333	acp7_c4_rnaAligned	0.262323	0.855536	1	FALSE	ABI1_minus	FALSE	FALSE	FALSE	FALSE
chr2	203328393	203432169	ABI2	0	+	5	9	plus	14	-0.142857	acp6_c1_rnaAligned	0.134906	0.42395	0.794126	FALSE	ABI2_plus	FALSE	FALSE	FALSE	FALSE
chr2	203328393	203432169	ABI2	0	+	13	14	plus	27	-0.0185185	acp6_c2_rnaAligned	0.260176	1	1	FALSE	ABI2_plus	FALSE	FALSE	FALSE	FALSE
chr2	203328393	203432169	ABI2	0	+	9	4	plus	13	0.192308	acp6_c6_rnaAligned	0.12527	0.266846	0.670523	FALSE	ABI2_plus	FALSE	FALSE	FALSE	FALSE
chr2	203328393	203432169	ABI2	0	+	22	12	plus	34	0.147059	acp7_c1_rnaAligned	0.327629	0.121449	0.47808	FALSE	ABI2_plus	FALSE	FALSE	FALSE	FALSE
chr2	203328393	203432169	ABI2	0	+	22	18	plus	40	0.05	acp7_c2_rnaAligned	0.385446	0.635828	0.943543	FALSE	ABI2_plus	FALSE	FALSE	FALSE	FALSE
chr2	203328393	203432169	ABI2	0	+	15	14	plus	29	0.0172414	acp7_c4_rnaAligned	0.279448	1	1	FALSE	ABI2_plus	FALSE	FALSE	FALSE	FALSE
chr3	100749155	100993421	ABI3BP	0	-	340	283	minus	623	0.0457464	acp6_c1_rnaAligned	2.5505	0.0247806	0.157547	FALSE	ABI3BP_minus	FALSE	FALSE	FALSE	FALSE
chr3	100749155	100993421	ABI3BP	0	-	215	206	minus	421	0.0106888	acp6_c2_rnaAligned	1.72353	0.696662	0.975878	FALSE	ABI3BP_minus	FALSE	FALSE	FALSE	FALSE
chr3	100749155	100993421	ABI3BP	0	-	100	100	minus	200	0	acp6_c5_rnaAligned	0.81878	1	1	FALSE	ABI3BP_minus	FALSE	FALSE	FALSE	FALSE
chr3	100749155	100993421	ABI3BP	0	-	433	295	minus	728	0.0947802	acp6_c6_rnaAligned	2.98036	3.54e-07	1.21e-05	TRUE	ABI3BP_minus	FALSE	FALSE	FALSE	FALSE
chr3	100749155	100993421	ABI3BP	0	-	9195	13574	minus	22769	-0.0961614	acp7_c1_rnaAligned	93.214	3.17e-186	2.67e-183	TRUE	ABI3BP_minus	FALSE	FALSE	FALSE	FALSE
chr3	100749155	100993421	ABI3BP	0	-	3379	7298	minus	10677	-0.183525	acp7_c2_rnaAligned	43.7105	5.14e-322	6.9324e-319	TRUE	ABI3BP_minus	FALSE	FALSE	FALSE	FALSE
chr3	100749155	100993421	ABI3BP	0	-	1200	3285	minus	4485	-0.232441	acp7_c4_rnaAligned	18.3611	6.7e-221	6.64e-218	TRUE	ABI3BP_minus	TRUE	FALSE	FALSE	FALSE
chr9	108934399	108950744	ABITRAM	0	+	6	5	plus	11	0.0454546	acp6_c1_rnaAligned	0.672989	1	1	FALSE	ABITRAM_plus	FALSE	FALSE	FALSE	FALSE
chr9	108934399	108950744	ABITRAM	0	+	9	8	plus	17	0.0294118	acp6_c2_rnaAligned	1.04007	1	1	FALSE	ABITRAM_plus	FALSE	FALSE	FALSE	FALSE
chr9	108934399	108950744	ABITRAM	0	+	3	9	plus	12	-0.25	acp6_c5_rnaAligned	0.734169	0.145996	0.514877	FALSE	ABITRAM_plus	TRUE	FALSE	FALSE	FALSE
chr9	108934399	108950744	ABITRAM	0	+	5	5	plus	10	0	acp6_c6_rnaAligned	0.611808	1	1	FALSE	ABITRAM_plus	FALSE	FALSE	FALSE	FALSE
chr9	130713042	130887675	ABL1	0	+	10	11	plus	21	-0.0238095	acp6_c1_rnaAligned	0.120252	1	1	FALSE	ABL1_plus	FALSE	FALSE	FALSE	FALSE
chr9	130713042	130887675	ABL1	0	+	12	16	plus	28	-0.0714286	acp6_c2_rnaAligned	0.160336	0.571588	0.908453	FALSE	ABL1_plus	FALSE	FALSE	FALSE	FALSE
chr9	130713042	130887675	ABL1	0	+	10	8	plus	18	0.0555556	acp6_c5_rnaAligned	0.103073	0.814529	1	FALSE	ABL1_plus	FALSE	FALSE	FALSE	FALSE
chr9	130713042	130887675	ABL1	0	+	18	12	plus	30	0.1	acp6_c6_rnaAligned	0.171789	0.361595	0.760248	FALSE	ABL1_plus	FALSE	FALSE	FALSE	FALSE
chr9	130713042	130887675	ABL1	0	+	17	32	plus	49	-0.153061	acp7_c1_rnaAligned	0.280588	0.0443842	0.263862	FALSE	ABL1_plus	FALSE	FALSE	FALSE	FALSE
chr9	130713042	130887675	ABL1	0	+	27	22	plus	49	0.0510204	acp7_c2_rnaAligned	0.280588	0.568172	0.909143	FALSE	ABL1_plus	FALSE	FALSE	FALSE	FALSE
chr9	130713042	130887675	ABL1	0	+	23	17	plus	40	0.075	acp7_c4_rnaAligned	0.229052	0.429591	0.825578	FALSE	ABL1_plus	FALSE	FALSE	FALSE	FALSE
chr1	179099329	179229677	ABL2	0	-	356	386	minus	742	-0.0202156	acp6_c1_rnaAligned	5.69245	0.287039	0.67343	FALSE	ABL2_minus	FALSE	FALSE	FALSE	FALSE
chr1	179099329	179229677	ABL2	0	-	464	439	minus	903	0.0138427	acp6_c2_rnaAligned	6.92761	0.424497	0.804461	FALSE	ABL2_minus	FALSE	FALSE	FALSE	FALSE
chr1	179099329	179229677	ABL2	0	-	262	271	minus	533	-0.0084428	acp6_c5_rnaAligned	4.08905	0.728989	0.993533	FALSE	ABL2_minus	FALSE	FALSE	FALSE	FALSE
chr1	179099329	179229677	ABL2	0	-	500	465	minus	965	0.0181347	acp6_c6_rnaAligned	7.40326	0.273728	0.67955	FALSE	ABL2_minus	FALSE	FALSE	FALSE	FALSE
chr1	179099329	179229677	ABL2	0	-	289	286	minus	575	0.0026087	acp7_c1_rnaAligned	4.41127	0.933538	1	FALSE	ABL2_minus	FALSE	FALSE	FALSE	FALSE
chr1	179099329	179229677	ABL2	0	-	308	283	minus	591	0.0211506	acp7_c2_rnaAligned	4.53402	0.323533	0.721554	FALSE	ABL2_minus	FALSE	FALSE	FALSE	FALSE
chr1	179099329	179229677	ABL2	0	-	188	179	minus	367	0.0122616	acp7_c4_rnaAligned	2.81554	0.6763	0.977331	FALSE	ABL2_minus	FALSE	FALSE	FALSE	FALSE
chr10	114431109	114801373	ABLIM1	0	-	492	460	minus	952	0.0168067	acp6_c1_rnaAligned	2.57114	0.315033	0.704991	FALSE	ABLIM1_minus	FALSE	FALSE	FALSE	FALSE
chr10	114431109	114801373	ABLIM1	0	-	539	498	minus	1037	0.0197686	acp6_c2_rnaAligned	2.8007	0.214165	0.58262	FALSE	ABLIM1_minus	FALSE	FALSE	FALSE	FALSE
chr10	114431109	114801373	ABLIM1	0	-	313	261	minus	574	0.0452962	acp6_c5_rnaAligned	1.55025	0.0331887	0.220591	FALSE	ABLIM1_minus	FALSE	FALSE	FALSE	FALSE
chr10	114431109	114801373	ABLIM1	0	-	347	359	minus	706	-0.0084986	acp6_c6_rnaAligned	1.90675	0.678911	0.959815	FALSE	ABLIM1_minus	FALSE	FALSE	FALSE	FALSE
chr10	114431109	114801373	ABLIM1	0	-	173	182	minus	355	-0.0126761	acp7_c1_rnaAligned	0.958775	0.671191	0.985432	FALSE	ABLIM1_minus	FALSE	FALSE	FALSE	FALSE
chr10	114431109	114801373	ABLIM1	0	-	285	201	minus	486	0.0864198	acp7_c2_rnaAligned	1.31258	0.00016094	0.00337514	TRUE	ABLIM1_minus	FALSE	FALSE	FALSE	FALSE
chr10	114431109	114801373	ABLIM1	0	-	142	165	minus	307	-0.0374593	acp7_c4_rnaAligned	0.829138	0.209188	0.609543	FALSE	ABLIM1_minus	FALSE	FALSE	FALSE	FALSE
chr5	149141492	149260542	ABLIM3	0	+	40	26	plus	66	0.106061	acp7_c1_rnaAligned	0.554389	0.108857	0.450847	FALSE	ABLIM3_plus	FALSE	FALSE	FALSE	FALSE
chr5	149141492	149260542	ABLIM3	0	+	33	25	plus	58	0.0689655	acp7_c2_rnaAligned	0.48719	0.358143	0.750918	FALSE	ABLIM3_plus	FALSE	FALSE	FALSE	FALSE
chr5	149141492	149260542	ABLIM3	0	+	11	11	plus	22	0	acp7_c4_rnaAligned	0.184796	1	1	FALSE	ABLIM3_plus	FALSE	FALSE	FALSE	FALSE
chr6	139028744	139043302	ABRACL	0	+	72	67	plus	139	0.0179856	acp6_c1_rnaAligned	9.54801	0.734539	0.990799	FALSE	ABRACL_plus	FALSE	FALSE	FALSE	FALSE
chr6	139028744	139043302	ABRACL	0	+	57	64	plus	121	-0.0289256	acp6_c2_rnaAligned	8.31158	0.585626	0.911242	FALSE	ABRACL_plus	FALSE	FALSE	FALSE	FALSE
chr6	139028744	139043302	ABRACL	0	+	46	36	plus	82	0.0609756	acp6_c5_rnaAligned	5.63264	0.320293	0.755626	FALSE	ABRACL_plus	FALSE	FALSE	FALSE	FALSE
chr6	139028744	139043302	ABRACL	0	+	85	65	plus	150	0.0666667	acp6_c6_rnaAligned	10.3036	0.120529	0.446753	FALSE	ABRACL_plus	FALSE	FALSE	FALSE	FALSE
chr6	139028744	139043302	ABRACL	0	+	14	29	plus	43	-0.174419	acp7_c1_rnaAligned	2.9537	0.0315395	0.214959	FALSE	ABRACL_plus	FALSE	FALSE	FALSE	FALSE
chr6	139028744	139043302	ABRACL	0	+	29	15	plus	44	0.159091	acp7_c2_rnaAligned	3.02239	0.0487668	0.270063	FALSE	ABRACL_plus	FALSE	FALSE	FALSE	FALSE
chr6	139028744	139043302	ABRACL	0	+	19	16	plus	35	0.0428571	acp7_c4_rnaAligned	2.40418	0.735879	1	FALSE	ABRACL_plus	FALSE	FALSE	FALSE	FALSE
chr4	83459516	83485100	ABRAXAS1	0	-	41	39	minus	80	0.0125	acp6_c1_rnaAligned	3.12695	0.911072	1	FALSE	ABRAXAS1_minus	FALSE	FALSE	FALSE	FALSE
chr4	83459516	83485100	ABRAXAS1	0	-	46	41	minus	87	0.0287356	acp6_c2_rnaAligned	3.40056	0.668285	0.958204	FALSE	ABRAXAS1_minus	FALSE	FALSE	FALSE	FALSE
chr4	83459516	83485100	ABRAXAS1	0	-	35	35	minus	70	0	acp6_c5_rnaAligned	2.73609	1	1	FALSE	ABRAXAS1_minus	FALSE	FALSE	FALSE	FALSE
chr4	83459516	83485100	ABRAXAS1	0	-	31	72	minus	103	-0.199029	acp6_c6_rnaAligned	4.02595	6.6e-05	0.00149722	TRUE	ABRAXAS1_minus	FALSE	FALSE	FALSE	FALSE
chr3	127672951	127680926	ABTB1	0	+	21	22	plus	43	-0.0116279	acp6_c1_rnaAligned	5.39185	1	1	FALSE	ABTB1_plus	FALSE	FALSE	FALSE	FALSE
chr3	127672951	127680926	ABTB1	0	+	22	31	plus	53	-0.0849057	acp6_c2_rnaAligned	6.64577	0.271679	0.652527	FALSE	ABTB1_plus	FALSE	FALSE	FALSE	FALSE
chr3	127672951	127680926	ABTB1	0	+	24	31	plus	55	-0.0636364	acp6_c5_rnaAligned	6.89655	0.418754	0.827659	FALSE	ABTB1_plus	FALSE	FALSE	FALSE	FALSE
chr3	127672951	127680926	ABTB1	0	+	22	23	plus	45	-0.0111111	acp6_c6_rnaAligned	5.64263	1	1	FALSE	ABTB1_plus	FALSE	FALSE	FALSE	FALSE
chr3	127672951	127680926	ABTB1	0	+	14	19	plus	33	-0.0757576	acp7_c1_rnaAligned	4.13793	0.48685	0.883405	FALSE	ABTB1_plus	FALSE	FALSE	FALSE	FALSE
chr3	127672951	127680926	ABTB1	0	+	18	15	plus	33	0.0454546	acp7_c2_rnaAligned	4.13793	0.728332	0.987911	FALSE	ABTB1_plus	FALSE	FALSE	FALSE	FALSE
chr3	127672951	127680926	ABTB1	0	+	22	16	plus	38	0.0789474	acp7_c4_rnaAligned	4.76489	0.417692	0.820179	FALSE	ABTB1_plus	FALSE	FALSE	FALSE	FALSE
chr11	34150986	34358010	ABTB2	0	-	25	33	minus	58	-0.0689655	acp6_c1_rnaAligned	0.280161	0.358143	0.746649	FALSE	ABTB2_minus	FALSE	FALSE	FALSE	FALSE
chr11	34150986	34358010	ABTB2	0	-	74	54	minus	128	0.078125	acp6_c2_rnaAligned	0.618286	0.09269	0.369842	FALSE	ABTB2_minus	FALSE	FALSE	FALSE	FALSE
chr11	34150986	34358010	ABTB2	0	-	40	48	minus	88	-0.0454545	acp6_c5_rnaAligned	0.425071	0.455741	0.85273	FALSE	ABTB2_minus	FALSE	FALSE	FALSE	FALSE
chr11	34150986	34358010	ABTB2	0	-	27	25	minus	52	0.0192308	acp6_c6_rnaAligned	0.251179	0.889884	1	FALSE	ABTB2_minus	FALSE	FALSE	FALSE	FALSE
chr11	34150986	34358010	ABTB2	0	-	21	15	minus	36	0.0833333	acp7_c1_rnaAligned	0.173893	0.405032	0.818223	FALSE	ABTB2_minus	FALSE	FALSE	FALSE	FALSE
chr11	34150986	34358010	ABTB2	0	-	26	7	minus	33	0.287879	acp7_c2_rnaAligned	0.159402	0.00131873	0.0195157	TRUE	ABTB2_minus	TRUE	FALSE	FALSE	FALSE
chr11	34150986	34358010	ABTB2	0	-	49	27	minus	76	0.144737	acp7_c4_rnaAligned	0.367107	0.0154403	0.127136	FALSE	ABTB2_minus	FALSE	FALSE	FALSE	FALSE
chr12	107318433	107659642	ABTB3	0	+	20	28	plus	48	-0.0833333	acp6_c1_rnaAligned	0.140676	0.312327	0.700103	FALSE	ABTB3_plus	FALSE	FALSE	FALSE	FALSE
chr12	107318433	107659642	ABTB3	0	+	12	37	plus	49	-0.255102	acp6_c2_rnaAligned	0.143607	0.00046976	0.00731703	TRUE	ABTB3_plus	TRUE	FALSE	FALSE	FALSE
chr12	107318433	107659642	ABTB3	0	+	24	20	plus	44	0.0454546	acp6_c5_rnaAligned	0.128953	0.651588	0.957433	FALSE	ABTB3_plus	FALSE	FALSE	FALSE	FALSE
chr12	107318433	107659642	ABTB3	0	+	22	27	plus	49	-0.0510204	acp6_c6_rnaAligned	0.143607	0.568172	0.908153	FALSE	ABTB3_plus	FALSE	FALSE	FALSE	FALSE
chr12	107318433	107659642	ABTB3	0	+	8	6	plus	14	0.0714286	acp7_c1_rnaAligned	0.0410306	0.790527	1	FALSE	ABTB3_plus	FALSE	FALSE	FALSE	FALSE
chr12	107318433	107659642	ABTB3	0	+	3	5	plus	8	-0.125	acp7_c2_rnaAligned	0.023446	0.726562	0.987911	FALSE	ABTB3_plus	FALSE	FALSE	FALSE	FALSE
chr12	107318433	107659642	ABTB3	0	+	8	6	plus	14	0.0714286	acp7_c4_rnaAligned	0.0410306	0.790527	1	FALSE	ABTB3_plus	FALSE	FALSE	FALSE	FALSE
chr18	49782163	49813533	ACAA2	0	-	5	8	minus	13	-0.115385	acp6_c6_rnaAligned	0.414409	0.581055	0.912307	FALSE	ACAA2_minus	FALSE	FALSE	FALSE	FALSE
chr18	49782163	49813533	ACAA2	0	-	19	18	minus	37	0.0135135	acp7_c1_rnaAligned	1.17947	1	1	FALSE	ACAA2_minus	FALSE	FALSE	FALSE	FALSE
chr18	49782163	49813533	ACAA2	0	-	29	20	minus	49	0.0918367	acp7_c2_rnaAligned	1.562	0.25287	0.647984	FALSE	ACAA2_minus	FALSE	FALSE	FALSE	FALSE
chr18	49782163	49813533	ACAA2	0	-	15	14	minus	29	0.0172414	acp7_c4_rnaAligned	0.92445	1	1	FALSE	ACAA2_minus	FALSE	FALSE	FALSE	FALSE
chr17	37084991	37406836	ACACA	0	-	5	7	minus	12	-0.0833333	acp6_c6_rnaAligned	0.037285	0.774414	0.999495	FALSE	ACACA_minus	FALSE	FALSE	FALSE	FALSE
chr12	109111188	109268226	ACACB	0	+	47	54	plus	101	-0.0346535	acp6_c1_rnaAligned	0.643156	0.550709	0.887161	FALSE	ACACB_plus	FALSE	FALSE	FALSE	FALSE
chr12	109111188	109268226	ACACB	0	+	55	43	plus	98	0.0612245	acp6_c2_rnaAligned	0.624053	0.266406	0.646637	FALSE	ACACB_plus	FALSE	FALSE	FALSE	FALSE
chr12	109111188	109268226	ACACB	0	+	29	44	plus	73	-0.10274	acp6_c5_rnaAligned	0.464856	0.100644	0.422164	FALSE	ACACB_plus	FALSE	FALSE	FALSE	FALSE
chr12	109111188	109268226	ACACB	0	+	49	40	plus	89	0.0505618	acp6_c6_rnaAligned	0.566742	0.39657	0.792565	FALSE	ACACB_plus	FALSE	FALSE	FALSE	FALSE
chr12	109111188	109268226	ACACB	0	+	23	32	plus	55	-0.0818182	acp7_c1_rnaAligned	0.350234	0.28061	0.714066	FALSE	ACACB_plus	FALSE	FALSE	FALSE	FALSE
chr12	109111188	109268226	ACACB	0	+	27	19	plus	46	0.0869565	acp7_c2_rnaAligned	0.292923	0.301996	0.69019	FALSE	ACACB_plus	FALSE	FALSE	FALSE	FALSE
chr12	109111188	109268226	ACACB	0	+	28	44	plus	72	-0.111111	acp7_c4_rnaAligned	0.458488	0.0763691	0.361342	FALSE	ACACB_plus	FALSE	FALSE	FALSE	FALSE
chr12	111686052	111757099	ACAD10	0	+	49	35	plus	84	0.0833333	acp6_c1_rnaAligned	1.18232	0.155656	0.493987	FALSE	ACAD10_plus	FALSE	FALSE	FALSE	FALSE
chr12	111686052	111757099	ACAD10	0	+	45	41	plus	86	0.0232558	acp6_c2_rnaAligned	1.21047	0.746534	1	FALSE	ACAD10_plus	FALSE	FALSE	FALSE	FALSE
chr12	111686052	111757099	ACAD10	0	+	24	34	plus	58	-0.0862069	acp6_c5_rnaAligned	0.816361	0.237047	0.656427	FALSE	ACAD10_plus	FALSE	FALSE	FALSE	FALSE
chr12	111686052	111757099	ACAD10	0	+	48	44	plus	92	0.0217391	acp6_c6_rnaAligned	1.29492	0.754652	0.994678	FALSE	ACAD10_plus	FALSE	FALSE	FALSE	FALSE
chr12	111686052	111757099	ACAD10	0	+	40	34	plus	74	0.0405405	acp7_c1_rnaAligned	1.04156	0.561381	0.921487	FALSE	ACAD10_plus	FALSE	FALSE	FALSE	FALSE
chr12	111686052	111757099	ACAD10	0	+	35	30	plus	65	0.0384615	acp7_c2_rnaAligned	0.914887	0.620145	0.9361	FALSE	ACAD10_plus	FALSE	FALSE	FALSE	FALSE
chr12	111686052	111757099	ACAD10	0	+	37	40	plus	77	-0.0194805	acp7_c4_rnaAligned	1.08379	0.819893	1	FALSE	ACAD10_plus	FALSE	FALSE	FALSE	FALSE
chr3	132558140	132659809	ACAD11	0	-	74	68	minus	142	0.0211268	acp6_c1_rnaAligned	1.39669	0.674935	0.957793	FALSE	ACAD11_minus	FALSE	FALSE	FALSE	FALSE
chr3	132558140	132659809	ACAD11	0	-	90	93	minus	183	-0.0081967	acp6_c2_rnaAligned	1.79996	0.882518	1	FALSE	ACAD11_minus	FALSE	FALSE	FALSE	FALSE
chr3	132558140	132659809	ACAD11	0	-	53	60	minus	113	-0.0309735	acp6_c5_rnaAligned	1.11145	0.572656	0.926586	FALSE	ACAD11_minus	FALSE	FALSE	FALSE	FALSE
chr3	132558140	132659809	ACAD11	0	-	72	85	minus	157	-0.0414013	acp6_c6_rnaAligned	1.54423	0.338235	0.745001	FALSE	ACAD11_minus	FALSE	FALSE	FALSE	FALSE
chr3	132558140	132659809	ACAD11	0	-	7	5	minus	12	0.0833333	acp7_c1_rnaAligned	0.11803	0.774414	1	FALSE	ACAD11_minus	FALSE	FALSE	FALSE	FALSE
chr3	132558140	132659809	ACAD11	0	-	5	5	minus	10	0	acp7_c2_rnaAligned	0.0983584	1	1	FALSE	ACAD11_minus	FALSE	FALSE	FALSE	FALSE
chr3	132558140	132659809	ACAD11	0	-	12	1	minus	13	0.423077	acp7_c4_rnaAligned	0.127866	0.00341797	0.0415024	TRUE	ACAD11_minus	TRUE	TRUE	TRUE	FALSE
chr3	128879619	128913114	ACAD9	0	+	293	296	plus	589	-0.0025467	acp6_c1_rnaAligned	17.5847	0.934331	1	FALSE	ACAD9_plus	FALSE	FALSE	FALSE	FALSE
chr3	128879619	128913114	ACAD9	0	+	310	298	plus	608	0.00986842	acp6_c2_rnaAligned	18.152	0.655554	0.955078	FALSE	ACAD9_plus	FALSE	FALSE	FALSE	FALSE
chr3	128879619	128913114	ACAD9	0	+	201	227	plus	428	-0.0303738	acp6_c5_rnaAligned	12.778	0.226844	0.645188	FALSE	ACAD9_plus	FALSE	FALSE	FALSE	FALSE
chr3	128879619	128913114	ACAD9	0	+	282	297	plus	579	-0.0129534	acp6_c6_rnaAligned	17.2862	0.560725	0.902032	FALSE	ACAD9_plus	FALSE	FALSE	FALSE	FALSE
chr3	128879619	128913114	ACAD9	0	+	110	101	plus	211	0.021327	acp7_c1_rnaAligned	6.29945	0.581915	0.931241	FALSE	ACAD9_plus	FALSE	FALSE	FALSE	FALSE
chr3	128879619	128913114	ACAD9	0	+	102	86	plus	188	0.0425532	acp7_c2_rnaAligned	5.61278	0.27392	0.66849	FALSE	ACAD9_plus	FALSE	FALSE	FALSE	FALSE
chr3	128879619	128913114	ACAD9	0	+	67	58	plus	125	0.036	acp7_c4_rnaAligned	3.7319	0.474422	0.863763	FALSE	ACAD9_plus	FALSE	FALSE	FALSE	FALSE
chr1	75724708	75763679	ACADM	0	+	60	71	plus	131	-0.0419847	acp6_c1_rnaAligned	3.36147	0.382354	0.767418	FALSE	ACADM_plus	FALSE	FALSE	FALSE	FALSE
chr1	75724708	75763679	ACADM	0	+	76	59	plus	135	0.062963	acp6_c2_rnaAligned	3.46411	0.168259	0.509242	FALSE	ACADM_plus	FALSE	FALSE	FALSE	FALSE
chr1	75724708	75763679	ACADM	0	+	42	52	plus	94	-0.0531915	acp6_c5_rnaAligned	2.41205	0.353328	0.782141	FALSE	ACADM_plus	FALSE	FALSE	FALSE	FALSE
chr1	75724708	75763679	ACADM	0	+	45	61	plus	106	-0.0754717	acp6_c6_rnaAligned	2.71997	0.144782	0.495367	FALSE	ACADM_plus	FALSE	FALSE	FALSE	FALSE
chr1	75724708	75763679	ACADM	0	+	7	14	plus	21	-0.166667	acp7_c1_rnaAligned	0.538862	0.189247	0.589142	FALSE	ACADM_plus	FALSE	FALSE	FALSE	FALSE
chr1	75724708	75763679	ACADM	0	+	8	4	plus	12	0.166667	acp7_c2_rnaAligned	0.307921	0.387695	0.774473	FALSE	ACADM_plus	FALSE	FALSE	FALSE	FALSE
chr1	75724708	75763679	ACADM	0	+	7	9	plus	16	-0.0625	acp7_c4_rnaAligned	0.410562	0.803619	1	FALSE	ACADM_plus	FALSE	FALSE	FALSE	FALSE
chr12	120725825	120740008	ACADS	0	+	13	11	plus	24	0.0416667	acp6_c1_rnaAligned	1.69217	0.83882	1	FALSE	ACADS_plus	FALSE	FALSE	FALSE	FALSE
chr12	120725825	120740008	ACADS	0	+	16	7	plus	23	0.195652	acp6_c2_rnaAligned	1.62166	0.0931397	0.369842	FALSE	ACADS_plus	FALSE	FALSE	FALSE	FALSE
chr12	120725825	120740008	ACADS	0	+	13	8	plus	21	0.119048	acp6_c5_rnaAligned	1.48065	0.38331	0.801445	FALSE	ACADS_plus	FALSE	FALSE	FALSE	FALSE
chr12	120725825	120740008	ACADS	0	+	9	21	plus	30	-0.2	acp6_c6_rnaAligned	2.11521	0.0427739	0.245928	FALSE	ACADS_plus	FALSE	FALSE	FALSE	FALSE
chr10	123009005	123058290	ACADSB	0	+	91	100	plus	191	-0.0235602	acp6_c1_rnaAligned	3.87542	0.562798	0.893481	FALSE	ACADSB_plus	FALSE	FALSE	FALSE	FALSE
chr10	123009005	123058290	ACADSB	0	+	92	120	plus	212	-0.0660377	acp6_c2_rnaAligned	4.30151	0.0634319	0.29543	FALSE	ACADSB_plus	FALSE	FALSE	FALSE	FALSE
chr10	123009005	123058290	ACADSB	0	+	112	82	plus	194	0.0773196	acp6_c5_rnaAligned	3.93629	0.0370619	0.236399	FALSE	ACADSB_plus	FALSE	FALSE	FALSE	FALSE
chr10	123009005	123058290	ACADSB	0	+	90	109	plus	199	-0.0477387	acp6_c6_rnaAligned	4.03774	0.201843	0.594518	FALSE	ACADSB_plus	FALSE	FALSE	FALSE	FALSE
chr10	123009005	123058290	ACADSB	0	+	58	53	plus	111	0.0225225	acp7_c1_rnaAligned	2.25221	0.704379	1	FALSE	ACADSB_plus	FALSE	FALSE	FALSE	FALSE
chr10	123009005	123058290	ACADSB	0	+	38	55	plus	93	-0.0913978	acp7_c2_rnaAligned	1.88698	0.0965652	0.401298	FALSE	ACADSB_plus	FALSE	FALSE	FALSE	FALSE
chr10	123009005	123058290	ACADSB	0	+	70	65	plus	135	0.0185185	acp7_c4_rnaAligned	2.73917	0.730789	0.998479	FALSE	ACADSB_plus	FALSE	FALSE	FALSE	FALSE
chr15	88803435	88875353	ACAN	0	+	241	87	plus	328	0.234756	acp6_c1_rnaAligned	4.56075	7.15e-18	5.33e-16	TRUE	ACAN_plus	TRUE	FALSE	FALSE	FALSE
chr15	88803435	88875353	ACAN	0	+	357	226	plus	583	0.11235	acp6_c2_rnaAligned	8.10645	6.45e-08	2.34e-06	TRUE	ACAN_plus	FALSE	FALSE	FALSE	FALSE
chr15	88803435	88875353	ACAN	0	+	278	121	plus	399	0.196742	acp6_c5_rnaAligned	5.54799	2.5e-15	2.11e-13	TRUE	ACAN_plus	FALSE	FALSE	FALSE	FALSE
chr15	88803435	88875353	ACAN	0	+	195	82	plus	277	0.203971	acp6_c6_rnaAligned	3.85161	8.8e-12	5.08e-10	TRUE	ACAN_plus	TRUE	FALSE	FALSE	FALSE
chr15	88803435	88875353	ACAN	0	+	4	15	plus	19	-0.289474	acp7_c1_rnaAligned	0.26419	0.0192108	0.157118	FALSE	ACAN_plus	TRUE	FALSE	FALSE	FALSE
chr15	88803435	88875353	ACAN	0	+	35	185	plus	220	-0.340909	acp7_c2_rnaAligned	3.05904	7.82e-26	1.17e-23	TRUE	ACAN_plus	TRUE	TRUE	FALSE	FALSE
chr15	88803435	88875353	ACAN	0	+	3	18	plus	21	-0.357143	acp7_c4_rnaAligned	0.291999	0.00148964	0.0212638	TRUE	ACAN_plus	TRUE	TRUE	FALSE	FALSE
chr3	195274744	195443020	ACAP2	0	-	197	203	minus	400	-0.0075	acp6_c1_rnaAligned	2.37705	0.802625	1	FALSE	ACAP2_minus	FALSE	FALSE	FALSE	FALSE
chr3	195274744	195443020	ACAP2	0	-	266	248	minus	514	0.0175097	acp6_c2_rnaAligned	3.05451	0.453385	0.829685	FALSE	ACAP2_minus	FALSE	FALSE	FALSE	FALSE
chr3	195274744	195443020	ACAP2	0	-	185	167	minus	352	0.0255682	acp6_c5_rnaAligned	2.0918	0.364902	0.79006	FALSE	ACAP2_minus	FALSE	FALSE	FALSE	FALSE
chr3	195274744	195443020	ACAP2	0	-	204	178	minus	382	0.0340314	acp6_c6_rnaAligned	2.27008	0.200796	0.592702	FALSE	ACAP2_minus	FALSE	FALSE	FALSE	FALSE
chr3	195274744	195443020	ACAP2	0	-	207	226	minus	433	-0.02194	acp7_c1_rnaAligned	2.57315	0.387048	0.803768	FALSE	ACAP2_minus	FALSE	FALSE	FALSE	FALSE
chr3	195274744	195443020	ACAP2	0	-	189	200	minus	389	-0.0141388	acp7_c2_rnaAligned	2.31168	0.612198	0.929608	FALSE	ACAP2_minus	FALSE	FALSE	FALSE	FALSE
chr3	195274744	195443020	ACAP2	0	-	163	169	minus	332	-0.0090361	acp7_c4_rnaAligned	1.97295	0.783818	1	FALSE	ACAP2_minus	FALSE	FALSE	FALSE	FALSE
chr1	1292390	1307930	ACAP3	0	-	45	31	minus	76	0.0921053	acp7_c1_rnaAligned	4.8906	0.135385	0.510741	FALSE	ACAP3_minus	FALSE	FALSE	FALSE	FALSE
chr1	1292390	1307930	ACAP3	0	-	35	28	minus	63	0.0555556	acp7_c2_rnaAligned	4.05405	0.449963	0.836647	FALSE	ACAP3_minus	FALSE	FALSE	FALSE	FALSE
chr1	1292390	1307930	ACAP3	0	-	23	27	minus	50	-0.04	acp7_c4_rnaAligned	3.2175	0.671811	0.97596	FALSE	ACAP3_minus	FALSE	FALSE	FALSE	FALSE
chr11	108116704	108147603	ACAT1	0	+	156	114	plus	270	0.0777778	acp6_c1_rnaAligned	8.73815	0.0124461	0.0975916	FALSE	ACAT1_plus	FALSE	FALSE	FALSE	FALSE
chr11	108116704	108147603	ACAT1	0	+	140	138	plus	278	0.00359712	acp6_c2_rnaAligned	8.99705	0.952189	1	FALSE	ACAT1_plus	FALSE	FALSE	FALSE	FALSE
chr11	108116704	108147603	ACAT1	0	+	116	118	plus	234	-0.0042735	acp6_c5_rnaAligned	7.57306	0.947896	1	FALSE	ACAT1_plus	FALSE	FALSE	FALSE	FALSE
chr11	108116704	108147603	ACAT1	0	+	161	143	plus	304	0.0296053	acp6_c6_rnaAligned	9.83851	0.329559	0.737842	FALSE	ACAT1_plus	FALSE	FALSE	FALSE	FALSE
chr6	159762044	159779112	ACAT2	0	+	219	204	plus	423	0.0177305	acp6_c1_rnaAligned	24.7832	0.496105	0.849753	FALSE	ACAT2_plus	FALSE	FALSE	FALSE	FALSE
chr6	159762044	159779112	ACAT2	0	+	100	83	plus	183	0.0464481	acp6_c2_rnaAligned	10.7218	0.236823	0.608683	FALSE	ACAT2_plus	FALSE	FALSE	FALSE	FALSE
chr6	159762044	159779112	ACAT2	0	+	92	88	plus	180	0.0111111	acp6_c5_rnaAligned	10.5461	0.82314	1	FALSE	ACAT2_plus	FALSE	FALSE	FALSE	FALSE
chr6	159762044	159779112	ACAT2	0	+	62	63	plus	125	-0.004	acp6_c6_rnaAligned	7.32365	1	1	FALSE	ACAT2_plus	FALSE	FALSE	FALSE	FALSE
chr6	159762044	159779112	ACAT2	0	+	63	69	plus	132	-0.0227273	acp7_c1_rnaAligned	7.73377	0.663585	0.979392	FALSE	ACAT2_plus	FALSE	FALSE	FALSE	FALSE
chr6	159762044	159779112	ACAT2	0	+	42	40	plus	82	0.0121951	acp7_c2_rnaAligned	4.80431	0.912157	1	FALSE	ACAT2_plus	FALSE	FALSE	FALSE	FALSE
chr6	159762044	159779112	ACAT2	0	+	89	82	plus	171	0.0204678	acp7_c4_rnaAligned	10.0187	0.646483	0.960686	FALSE	ACAT2_plus	FALSE	FALSE	FALSE	FALSE
chr1	226144678	226186741	ACBD3	0	-	381	378	minus	759	0.00197628	acp6_c1_rnaAligned	18.0444	0.942134	1	FALSE	ACBD3_minus	FALSE	FALSE	FALSE	FALSE
chr1	226144678	226186741	ACBD3	0	-	361	354	minus	715	0.0048951	acp6_c2_rnaAligned	16.9983	0.822475	1	FALSE	ACBD3_minus	FALSE	FALSE	FALSE	FALSE
chr1	226144678	226186741	ACBD3	0	-	320	274	minus	594	0.0387205	acp6_c5_rnaAligned	14.1217	0.0647475	0.329386	FALSE	ACBD3_minus	FALSE	FALSE	FALSE	FALSE
chr1	226144678	226186741	ACBD3	0	-	380	335	minus	715	0.0314685	acp6_c6_rnaAligned	16.9983	0.0997979	0.404919	FALSE	ACBD3_minus	FALSE	FALSE	FALSE	FALSE
chr1	226144678	226186741	ACBD3	0	-	255	234	minus	489	0.0214724	acp7_c1_rnaAligned	11.6254	0.365782	0.789769	FALSE	ACBD3_minus	FALSE	FALSE	FALSE	FALSE
chr1	226144678	226186741	ACBD3	0	-	192	200	minus	392	-0.0102041	acp7_c2_rnaAligned	9.31935	0.723723	0.987911	FALSE	ACBD3_minus	FALSE	FALSE	FALSE	FALSE
chr1	226144678	226186741	ACBD3	0	-	189	158	minus	347	0.0446686	acp7_c4_rnaAligned	8.24953	0.107158	0.439997	FALSE	ACBD3_minus	FALSE	FALSE	FALSE	FALSE
chr17	45131596	45144176	ACBD4	0	+	40	35	plus	75	0.0333333	acp6_c1_rnaAligned	5.96184	0.644464	0.941169	FALSE	ACBD4_plus	FALSE	FALSE	FALSE	FALSE
chr17	45131596	45144176	ACBD4	0	+	29	30	plus	59	-0.0084746	acp6_c2_rnaAligned	4.68998	1	1	FALSE	ACBD4_plus	FALSE	FALSE	FALSE	FALSE
chr17	45131596	45144176	ACBD4	0	+	27	33	plus	60	-0.05	acp6_c5_rnaAligned	4.76948	0.518958	0.906995	FALSE	ACBD4_plus	FALSE	FALSE	FALSE	FALSE
chr17	45131596	45144176	ACBD4	0	+	25	30	plus	55	-0.0454545	acp6_c6_rnaAligned	4.37202	0.590053	0.919468	FALSE	ACBD4_plus	FALSE	FALSE	FALSE	FALSE
chr10	27182837	27242111	ACBD5	0	-	112	86	minus	198	0.0656566	acp6_c1_rnaAligned	3.34042	0.0753561	0.329553	FALSE	ACBD5_minus	FALSE	FALSE	FALSE	FALSE
chr10	27182837	27242111	ACBD5	0	-	68	70	minus	138	-0.0072464	acp6_c2_rnaAligned	2.32817	0.932202	1	FALSE	ACBD5_minus	FALSE	FALSE	FALSE	FALSE
chr10	27182837	27242111	ACBD5	0	-	77	67	minus	144	0.0347222	acp6_c5_rnaAligned	2.4294	0.453372	0.851422	FALSE	ACBD5_minus	FALSE	FALSE	FALSE	FALSE
chr10	27182837	27242111	ACBD5	0	-	95	99	minus	194	-0.0103093	acp6_c6_rnaAligned	3.27294	0.829535	1	FALSE	ACBD5_minus	FALSE	FALSE	FALSE	FALSE
chr1	180269652	180502577	ACBD6	0	-	167	163	minus	330	0.00606061	acp6_c1_rnaAligned	1.41677	0.868862	1	FALSE	ACBD6_minus	FALSE	FALSE	FALSE	FALSE
chr1	180269652	180502577	ACBD6	0	-	250	215	minus	465	0.0376344	acp6_c2_rnaAligned	1.99635	0.114765	0.416999	FALSE	ACBD6_minus	FALSE	FALSE	FALSE	FALSE
chr1	180269652	180502577	ACBD6	0	-	129	115	minus	244	0.0286885	acp6_c5_rnaAligned	1.04755	0.405324	0.816613	FALSE	ACBD6_minus	FALSE	FALSE	FALSE	FALSE
chr1	180269652	180502577	ACBD6	0	-	195	213	minus	408	-0.0220588	acp6_c6_rnaAligned	1.75164	0.400026	0.796965	FALSE	ACBD6_minus	FALSE	FALSE	FALSE	FALSE
chr1	180269652	180502577	ACBD6	0	-	128	120	minus	248	0.016129	acp7_c1_rnaAligned	1.06472	0.656768	0.976965	FALSE	ACBD6_minus	FALSE	FALSE	FALSE	FALSE
chr1	180269652	180502577	ACBD6	0	-	110	86	minus	196	0.0612245	acp7_c2_rnaAligned	0.841473	0.100167	0.408721	FALSE	ACBD6_minus	FALSE	FALSE	FALSE	FALSE
chr1	180269652	180502577	ACBD6	0	-	74	95	minus	169	-0.0621302	acp7_c4_rnaAligned	0.725555	0.123683	0.469126	FALSE	ACBD6_minus	FALSE	FALSE	FALSE	FALSE
chr10	15075474	15088776	ACBD7	0	-	5	4	minus	9	0.0555556	acp7_c1_rnaAligned	0.67659	1	1	FALSE	ACBD7_minus	FALSE	FALSE	FALSE	FALSE
chr10	15075474	15088776	ACBD7	0	-	7	4	minus	11	0.136364	acp7_c2_rnaAligned	0.826943	0.548828	0.89608	FALSE	ACBD7_minus	FALSE	FALSE	FALSE	FALSE
chr10	15075474	15088776	ACBD7	0	-	4	8	minus	12	-0.166667	acp7_c4_rnaAligned	0.90212	0.387695	0.7933	FALSE	ACBD7_minus	FALSE	FALSE	FALSE	FALSE
chr11	44066269	44084237	ACCS	0	+	15	23	plus	38	-0.105263	acp6_c1_rnaAligned	2.11487	0.255875	0.635589	FALSE	ACCS_plus	FALSE	FALSE	FALSE	FALSE
chr11	44066269	44084237	ACCS	0	+	26	24	plus	50	0.02	acp6_c2_rnaAligned	2.78272	0.887725	1	FALSE	ACCS_plus	FALSE	FALSE	FALSE	FALSE
chr11	44066269	44084237	ACCS	0	+	19	32	plus	51	-0.127451	acp6_c5_rnaAligned	2.83838	0.0919145	0.402114	FALSE	ACCS_plus	FALSE	FALSE	FALSE	FALSE
chr11	44066269	44084237	ACCS	0	+	23	19	plus	42	0.0476191	acp6_c6_rnaAligned	2.33749	0.643969	0.942989	FALSE	ACCS_plus	FALSE	FALSE	FALSE	FALSE
chr11	44066269	44084237	ACCS	0	+	25	24	plus	49	0.0102041	acp7_c1_rnaAligned	2.72707	1	1	FALSE	ACCS_plus	FALSE	FALSE	FALSE	FALSE
chr11	44066269	44084237	ACCS	0	+	26	20	plus	46	0.0652174	acp7_c2_rnaAligned	2.56011	0.461391	0.842726	FALSE	ACCS_plus	FALSE	FALSE	FALSE	FALSE
chr11	44066269	44084237	ACCS	0	+	21	15	plus	36	0.0833333	acp7_c4_rnaAligned	2.00356	0.405032	0.807518	FALSE	ACCS_plus	FALSE	FALSE	FALSE	FALSE
chr11	43921067	44059977	ACCSL	0	+	10	12	plus	22	-0.0454545	acp6_c1_rnaAligned	0.158376	0.831812	1	FALSE	ACCSL_plus	FALSE	FALSE	FALSE	FALSE
chr11	43921067	44059977	ACCSL	0	+	15	21	plus	36	-0.0833333	acp6_c2_rnaAligned	0.259161	0.405032	0.788482	FALSE	ACCSL_plus	FALSE	FALSE	FALSE	FALSE
chr11	43921067	44059977	ACCSL	0	+	5	5	plus	10	0	acp6_c5_rnaAligned	0.0719891	1	1	FALSE	ACCSL_plus	FALSE	FALSE	FALSE	FALSE
chr11	43921067	44059977	ACCSL	0	+	10	12	plus	22	-0.0454545	acp6_c6_rnaAligned	0.158376	0.831812	1	FALSE	ACCSL_plus	FALSE	FALSE	FALSE	FALSE
chr11	43921067	44059977	ACCSL	0	+	7	4	plus	11	0.136364	acp7_c1_rnaAligned	0.079188	0.548828	0.912979	FALSE	ACCSL_plus	FALSE	FALSE	FALSE	FALSE
chr11	43921067	44059977	ACCSL	0	+	5	8	plus	13	-0.115385	acp7_c4_rnaAligned	0.0935858	0.581055	0.923748	FALSE	ACCSL_plus	FALSE	FALSE	FALSE	FALSE
chr16	67657511	67660260	ACD	0	-	33	23	minus	56	0.0892857	acp6_c1_rnaAligned	20.371	0.228806	0.602019	FALSE	ACD_minus	FALSE	FALSE	FALSE	FALSE
chr16	67657511	67660260	ACD	0	-	29	29	minus	58	0	acp6_c2_rnaAligned	21.0986	1	1	FALSE	ACD_minus	FALSE	FALSE	FALSE	FALSE
chr16	67657511	67660260	ACD	0	-	30	17	minus	47	0.138298	acp6_c5_rnaAligned	17.0971	0.0789407	0.370177	FALSE	ACD_minus	FALSE	FALSE	FALSE	FALSE
chr16	67657511	67660260	ACD	0	-	34	26	minus	60	0.0666667	acp6_c6_rnaAligned	21.8261	0.366294	0.765576	FALSE	ACD_minus	FALSE	FALSE	FALSE	FALSE
chr17	63477060	63498373	ACE	0	+	3	8	plus	11	-0.227273	acp6_c1_rnaAligned	0.516117	0.226562	0.600361	FALSE	ACE_plus	TRUE	FALSE	FALSE	FALSE
chr17	63477060	63498373	ACE	0	+	4	15	plus	19	-0.289474	acp6_c2_rnaAligned	0.891475	0.0192108	0.132749	FALSE	ACE_plus	TRUE	FALSE	FALSE	FALSE
chr17	63477060	63498373	ACE	0	+	7	1	plus	8	0.375	acp7_c2_rnaAligned	0.375358	0.0703125	0.334812	FALSE	ACE_plus	TRUE	TRUE	FALSE	FALSE
chr17	63477060	63498373	ACE	0	+	9	3	plus	12	0.25	acp7_c4_rnaAligned	0.563037	0.145996	0.511309	FALSE	ACE_plus	TRUE	FALSE	FALSE	FALSE
chr9	19409008	19452505	ACER2	0	+	3	7	plus	10	-0.2	acp6_c1_rnaAligned	0.229901	0.34375	0.731605	FALSE	ACER2_plus	FALSE	FALSE	FALSE	FALSE
chr9	19409008	19452505	ACER2	0	+	10	4	plus	14	0.214286	acp6_c2_rnaAligned	0.321861	0.179565	0.52832	FALSE	ACER2_plus	TRUE	FALSE	FALSE	FALSE
chr9	19409008	19452505	ACER2	0	+	9	13	plus	22	-0.0909091	acp6_c6_rnaAligned	0.505782	0.523467	0.882411	FALSE	ACER2_plus	FALSE	FALSE	FALSE	FALSE
chr9	19409008	19452505	ACER2	0	+	4	5	plus	9	-0.0555556	acp7_c1_rnaAligned	0.206911	1	1	FALSE	ACER2_plus	FALSE	FALSE	FALSE	FALSE
chr9	19409008	19452505	ACER2	0	+	3	5	plus	8	-0.125	acp7_c4_rnaAligned	0.183921	0.726562	0.996181	FALSE	ACER2_plus	FALSE	FALSE	FALSE	FALSE
chr14	23058563	23095614	ACIN1	0	-	10	10	minus	20	0	acp6_c1_rnaAligned	0.539797	1	1	FALSE	ACIN1_minus	FALSE	FALSE	FALSE	FALSE
chr14	23058563	23095614	ACIN1	0	-	16	12	minus	28	0.0714286	acp6_c2_rnaAligned	0.755715	0.571588	0.908453	FALSE	ACIN1_minus	FALSE	FALSE	FALSE	FALSE
chr14	23058563	23095614	ACIN1	0	-	7	3	minus	10	0.2	acp6_c5_rnaAligned	0.269898	0.34375	0.771025	FALSE	ACIN1_minus	FALSE	FALSE	FALSE	FALSE
chr14	23058563	23095614	ACIN1	0	-	8	15	minus	23	-0.152174	acp6_c6_rnaAligned	0.620766	0.21004	0.603031	FALSE	ACIN1_minus	FALSE	FALSE	FALSE	FALSE
chr14	23058563	23095614	ACIN1	0	-	271	290	minus	561	-0.016934	acp7_c1_rnaAligned	15.1413	0.447307	0.858536	FALSE	ACIN1_minus	FALSE	FALSE	FALSE	FALSE
chr14	23058563	23095614	ACIN1	0	-	223	246	minus	469	-0.0245203	acp7_c2_rnaAligned	12.6582	0.309691	0.701637	FALSE	ACIN1_minus	FALSE	FALSE	FALSE	FALSE
chr14	23058563	23095614	ACIN1	0	-	225	265	minus	490	-0.0408163	acp7_c4_rnaAligned	13.225	0.0779896	0.364808	FALSE	ACIN1_minus	FALSE	FALSE	FALSE	FALSE
chr2	236537121	236582354	ACKR3	0	+	3	10	plus	13	-0.269231	acp6_c1_rnaAligned	0.287401	0.0922852	0.370661	FALSE	ACKR3_plus	TRUE	FALSE	FALSE	FALSE
chr2	236537121	236582354	ACKR3	0	+	2	9	plus	11	-0.318182	acp6_c6_rnaAligned	0.243185	0.0654297	0.318947	FALSE	ACKR3_plus	TRUE	TRUE	FALSE	FALSE
chr3	132597269	132602644	ACKR4	0	+	207	148	plus	355	0.0830986	acp6_c2_rnaAligned	66.0465	0.00203892	0.0253992	TRUE	ACKR4_plus	FALSE	FALSE	FALSE	FALSE
chr3	132597269	132602644	ACKR4	0	+	109	187	plus	296	-0.131757	acp6_c5_rnaAligned	55.0698	6.79e-06	0.00022803	TRUE	ACKR4_plus	FALSE	FALSE	FALSE	FALSE
chr3	132597269	132602644	ACKR4	0	+	190	66	plus	256	0.242188	acp6_c6_rnaAligned	47.6279	4.27e-15	3.27e-13	TRUE	ACKR4_plus	TRUE	FALSE	FALSE	FALSE
chr17	41866916	41930545	ACLY	0	-	23	28	minus	51	-0.0490196	acp6_c1_rnaAligned	0.801521	0.575849	0.903466	FALSE	ACLY_minus	FALSE	FALSE	FALSE	FALSE
chr17	41866916	41930545	ACLY	0	-	12	29	minus	41	-0.207317	acp6_c2_rnaAligned	0.64436	0.0115078	0.0940361	FALSE	ACLY_minus	TRUE	FALSE	FALSE	FALSE
chr17	41866916	41930545	ACLY	0	-	17	18	minus	35	-0.0142857	acp6_c5_rnaAligned	0.550064	1	1	FALSE	ACLY_minus	FALSE	FALSE	FALSE	FALSE
chr17	41866916	41930545	ACLY	0	-	14	26	minus	40	-0.15	acp6_c6_rnaAligned	0.628644	0.0806905	0.361336	FALSE	ACLY_minus	FALSE	FALSE	FALSE	FALSE
chr17	41866916	41930545	ACLY	0	-	12	18	minus	30	-0.1	acp7_c1_rnaAligned	0.471483	0.361595	0.784336	FALSE	ACLY_minus	FALSE	FALSE	FALSE	FALSE
chr17	41866916	41930545	ACLY	0	-	11	12	minus	23	-0.0217391	acp7_c2_rnaAligned	0.36147	1	1	FALSE	ACLY_minus	FALSE	FALSE	FALSE	FALSE
chr17	41866916	41930545	ACLY	0	-	6	17	minus	23	-0.23913	acp7_c4_rnaAligned	0.36147	0.0346897	0.225085	FALSE	ACLY_minus	TRUE	FALSE	FALSE	FALSE
chr9	32384642	32454769	ACO1	0	+	204	209	plus	413	-0.0060533	acp6_c1_rnaAligned	5.88932	0.843993	1	FALSE	ACO1_plus	FALSE	FALSE	FALSE	FALSE
chr9	32384642	32454769	ACO1	0	+	258	253	plus	511	0.00489237	acp6_c2_rnaAligned	7.28678	0.85957	1	FALSE	ACO1_plus	FALSE	FALSE	FALSE	FALSE
chr9	32384642	32454769	ACO1	0	+	169	196	plus	365	-0.0369863	acp6_c5_rnaAligned	5.20484	0.173461	0.568235	FALSE	ACO1_plus	FALSE	FALSE	FALSE	FALSE
chr9	32384642	32454769	ACO1	0	+	207	249	plus	456	-0.0460526	acp6_c6_rnaAligned	6.50249	0.0547386	0.288793	FALSE	ACO1_plus	FALSE	FALSE	FALSE	FALSE
chr9	32384642	32454769	ACO1	0	+	283	341	plus	624	-0.0464744	acp7_c1_rnaAligned	8.89814	0.0224238	0.17201	FALSE	ACO1_plus	FALSE	FALSE	FALSE	FALSE
chr9	32384642	32454769	ACO1	0	+	152	159	plus	311	-0.011254	acp7_c2_rnaAligned	4.43481	0.733745	0.992492	FALSE	ACO1_plus	FALSE	FALSE	FALSE	FALSE
chr9	32384642	32454769	ACO1	0	+	131	209	plus	340	-0.114706	acp7_c4_rnaAligned	4.84835	2.75e-05	0.00070395	TRUE	ACO1_plus	FALSE	FALSE	FALSE	FALSE
chr1	54548227	54639192	ACOT11	0	+	7	14	plus	21	-0.166667	acp6_c1_rnaAligned	0.230858	0.189247	0.548565	FALSE	ACOT11_plus	FALSE	FALSE	FALSE	FALSE
chr1	54548227	54639192	ACOT11	0	+	9	3	plus	12	0.25	acp6_c2_rnaAligned	0.131919	0.145996	0.475012	FALSE	ACOT11_plus	TRUE	FALSE	FALSE	FALSE
chr1	54548227	54639192	ACOT11	0	+	15	5	plus	20	0.25	acp6_c5_rnaAligned	0.219865	0.0413895	0.252801	FALSE	ACOT11_plus	TRUE	FALSE	FALSE	FALSE
chr1	54548227	54639192	ACOT11	0	+	13	1	plus	14	0.428571	acp6_c6_rnaAligned	0.153905	0.00183105	0.0248193	TRUE	ACOT11_plus	TRUE	TRUE	TRUE	FALSE
chr1	54548227	54639192	ACOT11	0	+	7	6	plus	13	0.0384615	acp7_c1_rnaAligned	0.142912	1	1	FALSE	ACOT11_plus	FALSE	FALSE	FALSE	FALSE
chr6	24667076	24705046	ACOT13	0	+	3	7	plus	10	-0.2	acp6_c2_rnaAligned	0.263366	0.34375	0.733123	FALSE	ACOT13_plus	FALSE	FALSE	FALSE	FALSE
chr6	24667076	24705046	ACOT13	0	+	72	72	plus	144	0	acp7_c1_rnaAligned	3.79247	1	1	FALSE	ACOT13_plus	FALSE	FALSE	FALSE	FALSE
chr6	24667076	24705046	ACOT13	0	+	42	48	plus	90	-0.0333333	acp7_c2_rnaAligned	2.37029	0.598412	0.924108	FALSE	ACOT13_plus	FALSE	FALSE	FALSE	FALSE
chr6	24667076	24705046	ACOT13	0	+	61	51	plus	112	0.0446429	acp7_c4_rnaAligned	2.9497	0.395193	0.800036	FALSE	ACOT13_plus	FALSE	FALSE	FALSE	FALSE
chr14	73569058	73575658	ACOT2	0	+	9	14	plus	23	-0.108696	acp7_c1_rnaAligned	3.48485	0.404873	0.818223	FALSE	ACOT2_plus	FALSE	FALSE	FALSE	FALSE
chr14	73569058	73575658	ACOT2	0	+	10	6	plus	16	0.125	acp7_c2_rnaAligned	2.42424	0.454498	0.83846	FALSE	ACOT2_plus	FALSE	FALSE	FALSE	FALSE
chr14	73569058	73575658	ACOT2	0	+	5	4	plus	9	0.0555556	acp7_c4_rnaAligned	1.36364	1	1	FALSE	ACOT2_plus	FALSE	FALSE	FALSE	FALSE
chr1	6264271	6393767	ACOT7	0	-	9	12	minus	21	-0.0714286	acp7_c1_rnaAligned	0.162167	0.663624	0.979392	FALSE	ACOT7_minus	FALSE	FALSE	FALSE	FALSE
chr1	6264271	6393767	ACOT7	0	-	5	6	minus	11	-0.0454545	acp7_c2_rnaAligned	0.0849447	1	1	FALSE	ACOT7_minus	FALSE	FALSE	FALSE	FALSE
chr1	6264271	6393767	ACOT7	0	-	9	3	minus	12	0.25	acp7_c4_rnaAligned	0.0926669	0.145996	0.511309	FALSE	ACOT7_minus	TRUE	FALSE	FALSE	FALSE
chr20	45841720	45857392	ACOT8	0	-	15	15	minus	30	0	acp7_c1_rnaAligned	1.91424	1	1	FALSE	ACOT8_minus	FALSE	FALSE	FALSE	FALSE
chr20	45841720	45857392	ACOT8	0	-	17	11	minus	28	0.107143	acp7_c2_rnaAligned	1.78663	0.344928	0.73776	FALSE	ACOT8_minus	FALSE	FALSE	FALSE	FALSE
chr20	45841720	45857392	ACOT8	0	-	14	9	minus	23	0.108696	acp7_c4_rnaAligned	1.46759	0.404873	0.807518	FALSE	ACOT8_minus	FALSE	FALSE	FALSE	FALSE
chr17	75941506	75979166	ACOX1	0	-	8	3	minus	11	0.227273	acp6_c2_rnaAligned	0.292087	0.226562	0.596768	FALSE	ACOX1_minus	TRUE	FALSE	FALSE	FALSE
chr17	75941506	75979166	ACOX1	0	-	9	4	minus	13	0.192308	acp6_c5_rnaAligned	0.345194	0.266846	0.688501	FALSE	ACOX1_minus	FALSE	FALSE	FALSE	FALSE
chr17	75941506	75979166	ACOX1	0	-	159	156	minus	315	0.0047619	acp7_c1_rnaAligned	8.36431	0.910302	1	FALSE	ACOX1_minus	FALSE	FALSE	FALSE	FALSE
chr17	75941506	75979166	ACOX1	0	-	80	115	minus	195	-0.0897436	acp7_c2_rnaAligned	5.17791	0.0146884	0.121578	FALSE	ACOX1_minus	FALSE	FALSE	FALSE	FALSE
chr17	75941506	75979166	ACOX1	0	-	96	126	minus	222	-0.0675676	acp7_c4_rnaAligned	5.89485	0.0513672	0.289475	FALSE	ACOX1_minus	FALSE	FALSE	FALSE	FALSE
chr4	8366281	8440723	ACOX3	0	-	51	60	minus	111	-0.0405405	acp7_c1_rnaAligned	1.49109	0.447806	0.859298	FALSE	ACOX3_minus	FALSE	FALSE	FALSE	FALSE
chr4	8366281	8440723	ACOX3	0	-	39	29	minus	68	0.0735294	acp7_c2_rnaAligned	0.913463	0.27499	0.669488	FALSE	ACOX3_minus	FALSE	FALSE	FALSE	FALSE
chr4	8366281	8440723	ACOX3	0	-	43	30	minus	73	0.0890411	acp7_c4_rnaAligned	0.980629	0.159712	0.536136	FALSE	ACOX3_minus	FALSE	FALSE	FALSE	FALSE
chr2	264946	278283	ACP1	0	+	73	72	plus	145	0.00344828	acp7_c1_rnaAligned	10.872	1	1	FALSE	ACP1_plus	FALSE	FALSE	FALSE	FALSE
chr2	264946	278283	ACP1	0	+	64	56	plus	120	0.0333333	acp7_c2_rnaAligned	8.99753	0.522991	0.881887	FALSE	ACP1_plus	FALSE	FALSE	FALSE	FALSE
chr2	264946	278283	ACP1	0	+	49	61	plus	110	-0.0545455	acp7_c4_rnaAligned	8.24773	0.294234	0.705544	FALSE	ACP1_plus	FALSE	FALSE	FALSE	FALSE
chr11	47239301	47248814	ACP2	0	-	129	108	minus	237	0.0443038	acp6_c1_rnaAligned	24.9133	0.193789	0.555408	FALSE	ACP2_minus	FALSE	FALSE	FALSE	FALSE
chr11	47239301	47248814	ACP2	0	-	113	103	minus	216	0.0231481	acp6_c2_rnaAligned	22.7058	0.54039	0.89301	FALSE	ACP2_minus	FALSE	FALSE	FALSE	FALSE
chr11	47239301	47248814	ACP2	0	-	105	102	minus	207	0.00724638	acp6_c5_rnaAligned	21.7597	0.889486	1	FALSE	ACP2_minus	FALSE	FALSE	FALSE	FALSE
chr11	47239301	47248814	ACP2	0	-	109	114	minus	223	-0.0112108	acp6_c6_rnaAligned	23.4416	0.788879	1	FALSE	ACP2_minus	FALSE	FALSE	FALSE	FALSE
chr11	47239301	47248814	ACP2	0	-	121	120	minus	241	0.00207469	acp7_c1_rnaAligned	25.3338	1	1	FALSE	ACP2_minus	FALSE	FALSE	FALSE	FALSE
chr11	47239301	47248814	ACP2	0	-	83	60	minus	143	0.0804196	acp7_c2_rnaAligned	15.0321	0.0654308	0.322572	FALSE	ACP2_minus	FALSE	FALSE	FALSE	FALSE
chr11	47239301	47248814	ACP2	0	-	98	89	minus	187	0.0240642	acp7_c4_rnaAligned	19.6573	0.558652	0.910869	FALSE	ACP2_minus	FALSE	FALSE	FALSE	FALSE
chr1	147629657	147670524	ACP6	0	-	36	38	minus	74	-0.0135135	acp7_c1_rnaAligned	1.81075	0.907561	1	FALSE	ACP6_minus	FALSE	FALSE	FALSE	FALSE
chr1	147629657	147670524	ACP6	0	-	29	27	minus	56	0.0178571	acp7_c2_rnaAligned	1.3703	0.893853	1	FALSE	ACP6_minus	FALSE	FALSE	FALSE	FALSE
chr1	147629657	147670524	ACP6	0	-	19	17	minus	36	0.0277778	acp7_c4_rnaAligned	0.880906	0.867939	1	FALSE	ACP6_minus	FALSE	FALSE	FALSE	FALSE
chr17	50426217	50474837	ACSF2	0	+	11	7	plus	18	0.111111	acp6_c1_rnaAligned	0.370218	0.480682	0.834864	FALSE	ACSF2_plus	FALSE	FALSE	FALSE	FALSE
chr17	50426217	50474837	ACSF2	0	+	12	9	plus	21	0.0714286	acp6_c2_rnaAligned	0.431921	0.663624	0.955895	FALSE	ACSF2_plus	FALSE	FALSE	FALSE	FALSE
chr17	50426217	50474837	ACSF2	0	+	16	7	plus	23	0.195652	acp6_c5_rnaAligned	0.473056	0.0931397	0.402114	FALSE	ACSF2_plus	FALSE	FALSE	FALSE	FALSE
chr17	50426217	50474837	ACSF2	0	+	16	9	plus	25	0.14	acp6_c6_rnaAligned	0.514192	0.229523	0.627297	FALSE	ACSF2_plus	FALSE	FALSE	FALSE	FALSE
chr16	89093851	89156233	ACSF3	0	+	317	344	plus	661	-0.0204236	acp6_c1_rnaAligned	10.596	0.31188	0.699881	FALSE	ACSF3_plus	FALSE	FALSE	FALSE	FALSE
chr16	89093851	89156233	ACSF3	0	+	284	304	plus	588	-0.0170068	acp6_c2_rnaAligned	9.4258	0.433331	0.81307	FALSE	ACSF3_plus	FALSE	FALSE	FALSE	FALSE
chr16	89093851	89156233	ACSF3	0	+	177	312	plus	489	-0.138037	acp6_c5_rnaAligned	7.8388	1.08e-09	6.19e-08	TRUE	ACSF3_plus	FALSE	FALSE	FALSE	FALSE
chr16	89093851	89156233	ACSF3	0	+	352	466	plus	818	-0.0696822	acp6_c6_rnaAligned	13.1128	7.59e-05	0.00168255	TRUE	ACSF3_plus	FALSE	FALSE	FALSE	FALSE
chr16	89093851	89156233	ACSF3	0	+	42	51	plus	93	-0.0483871	acp7_c1_rnaAligned	1.49081	0.406924	0.820275	FALSE	ACSF3_plus	FALSE	FALSE	FALSE	FALSE
chr16	89093851	89156233	ACSF3	0	+	32	62	plus	94	-0.159575	acp7_c2_rnaAligned	1.50684	0.00258731	0.0326421	TRUE	ACSF3_plus	FALSE	FALSE	FALSE	FALSE
chr16	89093851	89156233	ACSF3	0	+	55	19	plus	74	0.243243	acp7_c4_rnaAligned	1.18624	3.38e-05	0.0008341	TRUE	ACSF3_plus	TRUE	FALSE	FALSE	FALSE
chr4	184755594	184826594	ACSL1	0	-	78	106	minus	184	-0.076087	acp6_c1_rnaAligned	2.59155	0.0462447	0.241741	FALSE	ACSL1_minus	FALSE	FALSE	FALSE	FALSE
chr4	184755594	184826594	ACSL1	0	-	95	104	minus	199	-0.0226131	acp6_c2_rnaAligned	2.80282	0.570754	0.908453	FALSE	ACSL1_minus	FALSE	FALSE	FALSE	FALSE
chr4	184755594	184826594	ACSL1	0	-	103	68	minus	171	0.102339	acp6_c5_rnaAligned	2.40845	0.00912208	0.091725	FALSE	ACSL1_minus	FALSE	FALSE	FALSE	FALSE
chr4	184755594	184826594	ACSL1	0	-	107	118	minus	225	-0.0244444	acp6_c6_rnaAligned	3.16901	0.505074	0.869276	FALSE	ACSL1_minus	FALSE	FALSE	FALSE	FALSE
chr2	222861035	222944639	ACSL3	0	+	497	598	plus	1095	-0.0461187	acp6_c1_rnaAligned	13.0975	0.00249568	0.0287646	TRUE	ACSL3_plus	FALSE	FALSE	FALSE	FALSE
chr2	222861035	222944639	ACSL3	0	+	559	529	plus	1088	0.0137868	acp6_c2_rnaAligned	13.0137	0.379306	0.770238	FALSE	ACSL3_plus	FALSE	FALSE	FALSE	FALSE
chr2	222861035	222944639	ACSL3	0	+	349	434	plus	783	-0.0542784	acp6_c5_rnaAligned	9.36558	0.00266031	0.0362571	TRUE	ACSL3_plus	FALSE	FALSE	FALSE	FALSE
chr2	222861035	222944639	ACSL3	0	+	499	575	plus	1074	-0.0353818	acp6_c6_rnaAligned	12.8463	0.0220621	0.157816	FALSE	ACSL3_plus	FALSE	FALSE	FALSE	FALSE
chr2	222861035	222944639	ACSL3	0	+	121	114	plus	235	0.0148936	acp7_c1_rnaAligned	2.81087	0.695591	1	FALSE	ACSL3_plus	FALSE	FALSE	FALSE	FALSE
chr2	222861035	222944639	ACSL3	0	+	109	112	plus	221	-0.0067873	acp7_c2_rnaAligned	2.64341	0.89302	1	FALSE	ACSL3_plus	FALSE	FALSE	FALSE	FALSE
chr2	222861035	222944639	ACSL3	0	+	116	123	plus	239	-0.0146444	acp7_c4_rnaAligned	2.85871	0.698022	0.991314	FALSE	ACSL3_plus	FALSE	FALSE	FALSE	FALSE
chr20	25006236	25058139	ACSS1	0	-	25	34	minus	59	-0.0762712	acp6_c1_rnaAligned	1.13674	0.297595	0.687975	FALSE	ACSS1_minus	FALSE	FALSE	FALSE	FALSE
chr20	25006236	25058139	ACSS1	0	-	46	42	minus	88	0.0227273	acp6_c2_rnaAligned	1.69547	0.749329	1	FALSE	ACSS1_minus	FALSE	FALSE	FALSE	FALSE
chr20	25006236	25058139	ACSS1	0	-	35	29	minus	64	0.046875	acp6_c5_rnaAligned	1.23307	0.532309	0.913299	FALSE	ACSS1_minus	FALSE	FALSE	FALSE	FALSE
chr20	25006236	25058139	ACSS1	0	-	17	20	minus	37	-0.0405405	acp6_c6_rnaAligned	0.712868	0.742829	0.994678	FALSE	ACSS1_minus	FALSE	FALSE	FALSE	FALSE
chr20	34874988	34927959	ACSS2	0	+	101	88	plus	189	0.0343915	acp6_c1_rnaAligned	3.56799	0.382785	0.767418	FALSE	ACSS2_plus	FALSE	FALSE	FALSE	FALSE
chr20	34874988	34927959	ACSS2	0	+	82	91	plus	173	-0.0260116	acp6_c2_rnaAligned	3.26594	0.54316	0.89301	FALSE	ACSS2_plus	FALSE	FALSE	FALSE	FALSE
chr20	34874988	34927959	ACSS2	0	+	48	45	plus	93	0.016129	acp6_c5_rnaAligned	1.75568	0.835846	1	FALSE	ACSS2_plus	FALSE	FALSE	FALSE	FALSE
chr20	34874988	34927959	ACSS2	0	+	75	80	plus	155	-0.016129	acp6_c6_rnaAligned	2.92613	0.748111	0.994678	FALSE	ACSS2_plus	FALSE	FALSE	FALSE	FALSE
chr20	34874988	34927959	ACSS2	0	+	69	70	plus	139	-0.0035971	acp7_c1_rnaAligned	2.62408	1	1	FALSE	ACSS2_plus	FALSE	FALSE	FALSE	FALSE
chr20	34874988	34927959	ACSS2	0	+	40	43	plus	83	-0.0180723	acp7_c2_rnaAligned	1.5669	0.826405	1	FALSE	ACSS2_plus	FALSE	FALSE	FALSE	FALSE
chr20	34874988	34927959	ACSS2	0	+	42	37	plus	79	0.0316456	acp7_c4_rnaAligned	1.49138	0.652964	0.963946	FALSE	ACSS2_plus	FALSE	FALSE	FALSE	FALSE
chr12	81077870	81261210	ACSS3	0	+	2	10	plus	12	-0.333333	acp6_c1_rnaAligned	0.0654522	0.0385742	0.2127	FALSE	ACSS3_plus	TRUE	TRUE	FALSE	FALSE
chr12	81077870	81261210	ACSS3	0	+	23	47	plus	70	-0.171429	acp6_c2_rnaAligned	0.381804	0.00558267	0.0552637	FALSE	ACSS3_plus	FALSE	FALSE	FALSE	FALSE
chr12	81077870	81261210	ACSS3	0	+	18	14	plus	32	0.0625	acp6_c5_rnaAligned	0.174539	0.596615	0.939519	FALSE	ACSS3_plus	FALSE	FALSE	FALSE	FALSE
chr12	81077870	81261210	ACSS3	0	+	6	7	plus	13	-0.0384615	acp6_c6_rnaAligned	0.0709065	1	1	FALSE	ACSS3_plus	FALSE	FALSE	FALSE	FALSE
chr12	81077870	81261210	ACSS3	0	+	17	23	plus	40	-0.075	acp7_c1_rnaAligned	0.218174	0.429591	0.841207	FALSE	ACSS3_plus	FALSE	FALSE	FALSE	FALSE
chr12	81077870	81261210	ACSS3	0	+	17	14	plus	31	0.0483871	acp7_c2_rnaAligned	0.169085	0.7201	0.987911	FALSE	ACSS3_plus	FALSE	FALSE	FALSE	FALSE
chr12	81077870	81261210	ACSS3	0	+	46	31	plus	77	0.0974026	acp7_c4_rnaAligned	0.419985	0.110016	0.440572	FALSE	ACSS3_plus	FALSE	FALSE	FALSE	FALSE
chr10	88935073	88991337	ACTA2	0	-	28	26	minus	54	0.0185185	acp7_c1_rnaAligned	0.959761	0.891923	1	FALSE	ACTA2_minus	FALSE	FALSE	FALSE	FALSE
chr10	88935073	88991337	ACTA2	0	-	34	14	minus	48	0.208333	acp7_c2_rnaAligned	0.853121	0.0055152	0.0595141	FALSE	ACTA2_minus	TRUE	FALSE	FALSE	FALSE
chr10	88935073	88991337	ACTA2	0	-	24	14	minus	38	0.131579	acp7_c4_rnaAligned	0.675387	0.143307	0.509413	FALSE	ACTA2_minus	FALSE	FALSE	FALSE	FALSE
chr17	81509970	81512799	ACTG1	0	-	2280	2335	minus	4615	-0.0059588	acp6_c1_rnaAligned	1631.32	0.42668	0.796749	FALSE	ACTG1_minus	FALSE	FALSE	FALSE	FALSE
chr17	81509970	81512799	ACTG1	0	-	2171	2375	minus	4546	-0.0224373	acp6_c2_rnaAligned	1606.93	0.00260182	0.0305034	TRUE	ACTG1_minus	FALSE	FALSE	FALSE	FALSE
chr17	81509970	81512799	ACTG1	0	-	2112	2176	minus	4288	-0.0074627	acp6_c5_rnaAligned	1515.73	0.336008	0.771025	FALSE	ACTG1_minus	FALSE	FALSE	FALSE	FALSE
chr17	81509970	81512799	ACTG1	0	-	85	143	minus	228	-0.127193	acp6_c6_rnaAligned	80.5938	0.00014846	0.00306654	TRUE	ACTG1_minus	FALSE	FALSE	FALSE	FALSE
chr17	81509970	81512799	ACTG1	0	-	63	91	minus	154	-0.0909091	acp7_c1_rnaAligned	54.4362	0.0292456	0.205133	FALSE	ACTG1_minus	FALSE	FALSE	FALSE	FALSE
chr17	81509970	81512799	ACTG1	0	-	3481	3555	minus	7036	-0.0052587	acp7_c2_rnaAligned	2487.1	0.384148	0.774473	FALSE	ACTG1_minus	FALSE	FALSE	FALSE	FALSE
chr17	81509970	81512799	ACTG1	0	-	3519	3330	minus	6849	0.0137976	acp7_c4_rnaAligned	2421	0.0230998	0.170697	FALSE	ACTG1_minus	FALSE	FALSE	FALSE	FALSE
chr3	179562925	179588407	ACTL6A	0	+	102	93	plus	195	0.0230769	acp7_c1_rnaAligned	7.65246	0.566831	0.925283	FALSE	ACTL6A_plus	FALSE	FALSE	FALSE	FALSE
chr3	179562925	179588407	ACTL6A	0	+	77	101	plus	178	-0.0674157	acp7_c2_rnaAligned	6.98532	0.084434	0.373493	FALSE	ACTL6A_plus	FALSE	FALSE	FALSE	FALSE
chr3	179562925	179588407	ACTL6A	0	+	87	103	plus	190	-0.0421053	acp7_c4_rnaAligned	7.45624	0.276463	0.690417	FALSE	ACTL6A_plus	FALSE	FALSE	FALSE	FALSE
chr19	40740860	40750477	ACTMAP	0	-	15	9	minus	24	0.125	acp6_c1_rnaAligned	2.49558	0.307456	0.694995	FALSE	ACTMAP_minus	FALSE	FALSE	FALSE	FALSE
chr19	40740860	40750477	ACTMAP	0	-	11	19	minus	30	-0.133333	acp6_c2_rnaAligned	3.11948	0.200488	0.561158	FALSE	ACTMAP_minus	FALSE	FALSE	FALSE	FALSE
chr19	40740860	40750477	ACTMAP	0	-	11	12	minus	23	-0.0217391	acp6_c5_rnaAligned	2.3916	1	1	FALSE	ACTMAP_minus	FALSE	FALSE	FALSE	FALSE
chr19	40740860	40750477	ACTMAP	0	-	7	15	minus	22	-0.181818	acp6_c6_rnaAligned	2.28762	0.133801	0.475086	FALSE	ACTMAP_minus	FALSE	FALSE	FALSE	FALSE
chr14	68874127	68979302	ACTN1	0	-	225	193	minus	418	0.0382775	acp6_c1_rnaAligned	3.97433	0.129355	0.446251	FALSE	ACTN1_minus	FALSE	FALSE	FALSE	FALSE
chr14	68874127	68979302	ACTN1	0	-	287	334	minus	621	-0.0378422	acp6_c2_rnaAligned	5.90444	0.0648177	0.297132	FALSE	ACTN1_minus	FALSE	FALSE	FALSE	FALSE
chr14	68874127	68979302	ACTN1	0	-	141	133	minus	274	0.0145985	acp6_c5_rnaAligned	2.60518	0.672456	0.969105	FALSE	ACTN1_minus	FALSE	FALSE	FALSE	FALSE
chr14	68874127	68979302	ACTN1	0	-	216	189	minus	405	0.0333333	acp6_c6_rnaAligned	3.85072	0.196313	0.585537	FALSE	ACTN1_minus	FALSE	FALSE	FALSE	FALSE
chr14	68874127	68979302	ACTN1	0	-	457	387	minus	844	0.0414692	acp7_c1_rnaAligned	8.02472	0.0174935	0.146744	FALSE	ACTN1_minus	FALSE	FALSE	FALSE	FALSE
chr14	68874127	68979302	ACTN1	0	-	296	292	minus	588	0.00340136	acp7_c2_rnaAligned	5.59068	0.901552	1	FALSE	ACTN1_minus	FALSE	FALSE	FALSE	FALSE
chr14	68874127	68979302	ACTN1	0	-	184	201	minus	385	-0.0220779	acp7_c4_rnaAligned	3.66057	0.414857	0.818202	FALSE	ACTN1_minus	FALSE	FALSE	FALSE	FALSE
chr19	38647648	38731589	ACTN4	0	+	66	77	plus	143	-0.0384615	acp6_c1_rnaAligned	1.70358	0.403104	0.780475	FALSE	ACTN4_plus	FALSE	FALSE	FALSE	FALSE
chr19	38647648	38731589	ACTN4	0	+	79	101	plus	180	-0.0611111	acp6_c2_rnaAligned	2.14436	0.117279	0.421471	FALSE	ACTN4_plus	FALSE	FALSE	FALSE	FALSE
chr19	38647648	38731589	ACTN4	0	+	70	63	plus	133	0.0263158	acp6_c5_rnaAligned	1.58445	0.603046	0.940294	FALSE	ACTN4_plus	FALSE	FALSE	FALSE	FALSE
chr19	38647648	38731589	ACTN4	0	+	91	83	plus	174	0.0229885	acp6_c6_rnaAligned	2.07288	0.595776	0.923715	FALSE	ACTN4_plus	FALSE	FALSE	FALSE	FALSE
chr19	38647648	38731589	ACTN4	0	+	1815	1599	plus	3414	0.0316345	acp7_c1_rnaAligned	40.6714	0.00023252	0.00506141	TRUE	ACTN4_plus	FALSE	FALSE	FALSE	FALSE
chr19	38647648	38731589	ACTN4	0	+	1636	1571	plus	3207	0.0101341	acp7_c2_rnaAligned	38.2054	0.258416	0.654939	FALSE	ACTN4_plus	FALSE	FALSE	FALSE	FALSE
chr19	38647648	38731589	ACTN4	0	+	948	980	plus	1928	-0.0082988	acp7_c4_rnaAligned	22.9685	0.480194	0.86701	FALSE	ACTN4_plus	FALSE	FALSE	FALSE	FALSE
chr14	58200148	58235636	ACTR10	0	+	55	39	plus	94	0.0851064	acp6_c1_rnaAligned	2.64878	0.121371	0.428194	FALSE	ACTR10_plus	FALSE	FALSE	FALSE	FALSE
chr14	58200148	58235636	ACTR10	0	+	57	58	plus	115	-0.0043478	acp6_c2_rnaAligned	3.24053	1	1	FALSE	ACTR10_plus	FALSE	FALSE	FALSE	FALSE
chr14	58200148	58235636	ACTR10	0	+	47	38	plus	85	0.0529412	acp6_c5_rnaAligned	2.39518	0.385669	0.801445	FALSE	ACTR10_plus	FALSE	FALSE	FALSE	FALSE
chr14	58200148	58235636	ACTR10	0	+	55	38	plus	93	0.0913979	acp6_c6_rnaAligned	2.6206	0.0965652	0.397413	FALSE	ACTR10_plus	FALSE	FALSE	FALSE	FALSE
chr14	58200148	58235636	ACTR10	0	+	72	55	plus	127	0.0669291	acp7_c1_rnaAligned	3.57867	0.1554	0.542188	FALSE	ACTR10_plus	FALSE	FALSE	FALSE	FALSE
chr14	58200148	58235636	ACTR10	0	+	49	67	plus	116	-0.0775862	acp7_c2_rnaAligned	3.26871	0.114083	0.441445	FALSE	ACTR10_plus	FALSE	FALSE	FALSE	FALSE
chr14	58200148	58235636	ACTR10	0	+	48	31	plus	79	0.107595	acp7_c4_rnaAligned	2.2261	0.0711634	0.345956	FALSE	ACTR10_plus	FALSE	FALSE	FALSE	FALSE
chr10	102479228	102502712	ACTR1A	0	-	717	612	minus	1329	0.0395034	acp6_c1_rnaAligned	56.5917	0.00431621	0.0441219	TRUE	ACTR1A_minus	FALSE	FALSE	FALSE	FALSE
chr10	102479228	102502712	ACTR1A	0	-	512	568	minus	1080	-0.0259259	acp6_c2_rnaAligned	45.9888	0.0941641	0.37313	FALSE	ACTR1A_minus	FALSE	FALSE	FALSE	FALSE
chr10	102479228	102502712	ACTR1A	0	-	492	466	minus	958	0.0135699	acp6_c5_rnaAligned	40.7937	0.41927	0.827659	FALSE	ACTR1A_minus	FALSE	FALSE	FALSE	FALSE
chr10	102479228	102502712	ACTR1A	0	-	795	696	minus	1491	0.0331992	acp6_c6_rnaAligned	63.49	0.011125	0.101451	FALSE	ACTR1A_minus	FALSE	FALSE	FALSE	FALSE
chr10	102479228	102502712	ACTR1A	0	-	347	331	minus	678	0.0117994	acp7_c1_rnaAligned	28.8707	0.564599	0.92353	FALSE	ACTR1A_minus	FALSE	FALSE	FALSE	FALSE
chr10	102479228	102502712	ACTR1A	0	-	219	195	minus	414	0.0289855	acp7_c2_rnaAligned	17.629	0.258286	0.654816	FALSE	ACTR1A_minus	FALSE	FALSE	FALSE	FALSE
chr10	102479228	102502712	ACTR1A	0	-	203	205	minus	408	-0.002451	acp7_c4_rnaAligned	17.3735	0.960523	1	FALSE	ACTR1A_minus	FALSE	FALSE	FALSE	FALSE
chr2	97655938	97664044	ACTR1B	0	-	210	185	minus	395	0.0316456	acp6_c1_rnaAligned	48.7293	0.227168	0.601766	FALSE	ACTR1B_minus	FALSE	FALSE	FALSE	FALSE
chr2	97655938	97664044	ACTR1B	0	-	157	153	minus	310	0.00645161	acp6_c2_rnaAligned	38.2433	0.86474	1	FALSE	ACTR1B_minus	FALSE	FALSE	FALSE	FALSE
chr2	97655938	97664044	ACTR1B	0	-	146	146	minus	292	0	acp6_c5_rnaAligned	36.0227	1	1	FALSE	ACTR1B_minus	FALSE	FALSE	FALSE	FALSE
chr2	97655938	97664044	ACTR1B	0	-	85	103	minus	188	-0.0478723	acp6_c6_rnaAligned	23.1927	0.214922	0.610146	FALSE	ACTR1B_minus	FALSE	FALSE	FALSE	FALSE
chr2	97655938	97664044	ACTR1B	0	-	87	74	minus	161	0.0403727	acp7_c1_rnaAligned	19.8618	0.344314	0.76992	FALSE	ACTR1B_minus	FALSE	FALSE	FALSE	FALSE
chr2	97655938	97664044	ACTR1B	0	-	69	63	minus	132	0.0227273	acp7_c2_rnaAligned	16.2842	0.663585	0.960493	FALSE	ACTR1B_minus	FALSE	FALSE	FALSE	FALSE
chr2	97655938	97664044	ACTR1B	0	-	70	57	minus	127	0.0511811	acp7_c4_rnaAligned	15.6674	0.286915	0.697154	FALSE	ACTR1B_minus	FALSE	FALSE	FALSE	FALSE
chr2	65227830	65271253	ACTR2	0	+	7	11	plus	18	-0.111111	acp6_c1_rnaAligned	0.414527	0.480682	0.834864	FALSE	ACTR2_plus	FALSE	FALSE	FALSE	FALSE
chr2	65227830	65271253	ACTR2	0	+	3	15	plus	18	-0.333333	acp6_c2_rnaAligned	0.414527	0.00753784	0.0683464	FALSE	ACTR2_plus	TRUE	TRUE	FALSE	FALSE
chr2	65227830	65271253	ACTR2	0	+	6	4	plus	10	0.1	acp6_c5_rnaAligned	0.230293	0.753906	0.997325	FALSE	ACTR2_plus	FALSE	FALSE	FALSE	FALSE
chr2	65227830	65271253	ACTR2	0	+	9	15	plus	24	-0.125	acp6_c6_rnaAligned	0.552702	0.307456	0.715065	FALSE	ACTR2_plus	FALSE	FALSE	FALSE	FALSE
chr2	113890088	113962596	ACTR3	0	+	19	23	plus	42	-0.047619	acp7_c1_rnaAligned	0.579246	0.643969	0.968477	FALSE	ACTR3_plus	FALSE	FALSE	FALSE	FALSE
chr2	113890088	113962596	ACTR3	0	+	24	23	plus	47	0.0106383	acp7_c2_rnaAligned	0.648204	1	1	FALSE	ACTR3_plus	FALSE	FALSE	FALSE	FALSE
chr2	113890088	113962596	ACTR3	0	+	9	12	plus	21	-0.0714286	acp7_c4_rnaAligned	0.289623	0.663624	0.970288	FALSE	ACTR3_plus	FALSE	FALSE	FALSE	FALSE
chr7	152759751	152855378	ACTR3B	0	+	65	91	plus	156	-0.0833333	acp6_c1_rnaAligned	1.63134	0.0449802	0.236308	FALSE	ACTR3B_plus	FALSE	FALSE	FALSE	FALSE
chr7	152759751	152855378	ACTR3B	0	+	95	86	plus	181	0.0248619	acp6_c2_rnaAligned	1.89277	0.552207	0.896003	FALSE	ACTR3B_plus	FALSE	FALSE	FALSE	FALSE
chr7	152759751	152855378	ACTR3B	0	+	61	60	plus	121	0.00413223	acp6_c5_rnaAligned	1.26533	1	1	FALSE	ACTR3B_plus	FALSE	FALSE	FALSE	FALSE
chr7	152759751	152855378	ACTR3B	0	+	140	98	plus	238	0.0882353	acp6_c6_rnaAligned	2.48884	0.00773701	0.0754701	FALSE	ACTR3B_plus	FALSE	FALSE	FALSE	FALSE
chr7	152759751	152855378	ACTR3B	0	+	147	168	plus	315	-0.0333333	acp7_c1_rnaAligned	3.29405	0.259763	0.69336	FALSE	ACTR3B_plus	FALSE	FALSE	FALSE	FALSE
chr7	152759751	152855378	ACTR3B	0	+	136	166	plus	302	-0.0496689	acp7_c2_rnaAligned	3.1581	0.0950014	0.399707	FALSE	ACTR3B_plus	FALSE	FALSE	FALSE	FALSE
chr7	152759751	152855378	ACTR3B	0	+	124	137	plus	261	-0.0249042	acp7_c4_rnaAligned	2.72935	0.457679	0.849011	FALSE	ACTR3B_plus	FALSE	FALSE	FALSE	FALSE
chr7	149881359	150323545	ACTR3C	0	-	9	7	minus	16	0.0625	acp6_c1_rnaAligned	0.0361839	0.803619	1	FALSE	ACTR3C_minus	FALSE	FALSE	FALSE	FALSE
chr7	149881359	150323545	ACTR3C	0	-	9	10	minus	19	-0.0263158	acp6_c2_rnaAligned	0.0429683	1	1	FALSE	ACTR3C_minus	FALSE	FALSE	FALSE	FALSE
chr7	149881359	150323545	ACTR3C	0	-	4	17	minus	21	-0.309524	acp6_c5_rnaAligned	0.0474913	0.00719738	0.0776091	FALSE	ACTR3C_minus	TRUE	TRUE	FALSE	FALSE
chr7	149881359	150323545	ACTR3C	0	-	9	8	minus	17	0.0294118	acp6_c6_rnaAligned	0.0384454	1	1	FALSE	ACTR3C_minus	FALSE	FALSE	FALSE	FALSE
chr7	149881359	150323545	ACTR3C	0	-	13	29	minus	42	-0.190476	acp7_c1_rnaAligned	0.0949827	0.0195205	0.159496	FALSE	ACTR3C_minus	FALSE	FALSE	FALSE	FALSE
chr7	149881359	150323545	ACTR3C	0	-	8	20	minus	28	-0.214286	acp7_c2_rnaAligned	0.0633218	0.0356981	0.221268	FALSE	ACTR3C_minus	TRUE	FALSE	FALSE	FALSE
chr7	149881359	150323545	ACTR3C	0	-	6	24	minus	30	-0.3	acp7_c4_rnaAligned	0.0678447	0.00143091	0.0207796	TRUE	ACTR3C_minus	TRUE	TRUE	FALSE	FALSE
chr20	38748459	38772520	ACTR5	0	+	81	84	plus	165	-0.0090909	acp6_c1_rnaAligned	6.85757	0.876331	1	FALSE	ACTR5_plus	FALSE	FALSE	FALSE	FALSE
chr20	38748459	38772520	ACTR5	0	+	61	93	plus	154	-0.103896	acp6_c2_rnaAligned	6.4004	0.012237	0.0971688	FALSE	ACTR5_plus	FALSE	FALSE	FALSE	FALSE
chr20	38748459	38772520	ACTR5	0	+	63	80	plus	143	-0.0594406	acp6_c5_rnaAligned	5.94323	0.180701	0.57888	FALSE	ACTR5_plus	FALSE	FALSE	FALSE	FALSE
chr20	38748459	38772520	ACTR5	0	+	88	72	plus	160	0.05	acp6_c6_rnaAligned	6.64977	0.235582	0.63545	FALSE	ACTR5_plus	FALSE	FALSE	FALSE	FALSE
chr12	100200814	100224424	ACTR6	0	+	39	48	plus	87	-0.0517241	acp6_c1_rnaAligned	3.68488	0.391191	0.769904	FALSE	ACTR6_plus	FALSE	FALSE	FALSE	FALSE
chr12	100200814	100224424	ACTR6	0	+	37	50	plus	87	-0.0747126	acp6_c2_rnaAligned	3.68488	0.197979	0.557916	FALSE	ACTR6_plus	FALSE	FALSE	FALSE	FALSE
chr12	100200814	100224424	ACTR6	0	+	32	40	plus	72	-0.0555556	acp6_c5_rnaAligned	3.04956	0.409579	0.821571	FALSE	ACTR6_plus	FALSE	FALSE	FALSE	FALSE
chr12	100200814	100224424	ACTR6	0	+	44	55	plus	99	-0.0555556	acp6_c6_rnaAligned	4.19314	0.31488	0.720448	FALSE	ACTR6_plus	FALSE	FALSE	FALSE	FALSE
chr3	53858991	53882152	ACTR8	0	-	14	20	minus	34	-0.0882353	acp6_c1_rnaAligned	1.46798	0.391528	0.769904	FALSE	ACTR8_minus	FALSE	FALSE	FALSE	FALSE
chr3	53858991	53882152	ACTR8	0	-	7	10	minus	17	-0.0882353	acp6_c5_rnaAligned	0.733992	0.629059	0.950741	FALSE	ACTR8_minus	FALSE	FALSE	FALSE	FALSE
chr3	53858991	53882152	ACTR8	0	-	8	11	minus	19	-0.0789474	acp6_c6_rnaAligned	0.820345	0.647606	0.942989	FALSE	ACTR8_minus	FALSE	FALSE	FALSE	FALSE
chr3	53858991	53882152	ACTR8	0	-	229	227	minus	456	0.00219298	acp7_c1_rnaAligned	19.6883	0.962656	1	FALSE	ACTR8_minus	FALSE	FALSE	FALSE	FALSE
chr3	53858991	53882152	ACTR8	0	-	158	148	minus	306	0.0163399	acp7_c2_rnaAligned	13.2119	0.606978	0.925913	FALSE	ACTR8_minus	FALSE	FALSE	FALSE	FALSE
chr3	53858991	53882152	ACTR8	0	-	160	155	minus	315	0.00793651	acp7_c4_rnaAligned	13.6004	0.821732	1	FALSE	ACTR8_minus	FALSE	FALSE	FALSE	FALSE
chr3	169766920	169769561	ACTRT3	0	-	20	18	minus	38	0.0263158	acp7_c1_rnaAligned	14.3885	0.871415	1	FALSE	ACTRT3_minus	FALSE	FALSE	FALSE	FALSE
chr3	169766920	169769561	ACTRT3	0	-	4	13	minus	17	-0.264706	acp7_c2_rnaAligned	6.43696	0.0490418	0.270063	FALSE	ACTRT3_minus	TRUE	FALSE	FALSE	FALSE
chr3	169766920	169769561	ACTRT3	0	-	8	11	minus	19	-0.0789474	acp7_c4_rnaAligned	7.19424	0.647606	0.960686	FALSE	ACTRT3_minus	FALSE	FALSE	FALSE	FALSE
chr2	157736445	157876330	ACVR1	0	-	9	4	minus	13	0.192308	acp6_c1_rnaAligned	0.0929335	0.266846	0.64487	FALSE	ACVR1_minus	FALSE	FALSE	FALSE	FALSE
chr2	157736445	157876330	ACVR1	0	-	2	11	minus	13	-0.346154	acp6_c5_rnaAligned	0.0929335	0.0224609	0.172282	FALSE	ACVR1_minus	TRUE	TRUE	FALSE	FALSE
chr2	157736445	157876330	ACVR1	0	-	5	7	minus	12	-0.0833333	acp6_c6_rnaAligned	0.0857848	0.774414	0.999495	FALSE	ACVR1_minus	FALSE	FALSE	FALSE	FALSE
chr2	157736445	157876330	ACVR1	0	-	22	23	minus	45	-0.0111111	acp7_c1_rnaAligned	0.321693	1	1	FALSE	ACVR1_minus	FALSE	FALSE	FALSE	FALSE
chr2	157736445	157876330	ACVR1	0	-	19	13	minus	32	0.09375	acp7_c2_rnaAligned	0.228759	0.377086	0.770252	FALSE	ACVR1_minus	FALSE	FALSE	FALSE	FALSE
chr2	157736445	157876330	ACVR1	0	-	11	11	minus	22	0	acp7_c4_rnaAligned	0.157272	1	1	FALSE	ACVR1_minus	FALSE	FALSE	FALSE	FALSE
chr12	51951698	51997078	ACVR1B	0	+	2	8	plus	10	-0.3	acp6_c5_rnaAligned	0.220361	0.109375	0.439241	FALSE	ACVR1B_plus	TRUE	TRUE	FALSE	FALSE
chr12	51951698	51997078	ACVR1B	0	+	7	7	plus	14	0	acp6_c6_rnaAligned	0.308506	1	1	FALSE	ACVR1B_plus	FALSE	FALSE	FALSE	FALSE
chr12	51951698	51997078	ACVR1B	0	+	40	34	plus	74	0.0405405	acp7_c1_rnaAligned	1.63067	0.561381	0.921487	FALSE	ACVR1B_plus	FALSE	FALSE	FALSE	FALSE
chr12	51951698	51997078	ACVR1B	0	+	19	23	plus	42	-0.047619	acp7_c2_rnaAligned	0.925518	0.643969	0.949705	FALSE	ACVR1B_plus	FALSE	FALSE	FALSE	FALSE
chr12	51951698	51997078	ACVR1B	0	+	24	28	plus	52	-0.0384615	acp7_c4_rnaAligned	1.14588	0.677809	0.977331	FALSE	ACVR1B_plus	FALSE	FALSE	FALSE	FALSE
chr2	147844516	147930822	ACVR2A	0	+	29	28	plus	57	0.00877193	acp7_c1_rnaAligned	0.660441	1	1	FALSE	ACVR2A_plus	FALSE	FALSE	FALSE	FALSE
chr2	147844516	147930822	ACVR2A	0	+	20	11	plus	31	0.145161	acp7_c2_rnaAligned	0.359187	0.149613	0.502746	FALSE	ACVR2A_plus	FALSE	FALSE	FALSE	FALSE
chr2	147844516	147930822	ACVR2A	0	+	18	12	plus	30	0.1	acp7_c4_rnaAligned	0.3476	0.361595	0.76914	FALSE	ACVR2A_plus	FALSE	FALSE	FALSE	FALSE
chr3	38453889	38493142	ACVR2B	0	+	71	53	plus	124	0.0725806	acp6_c1_rnaAligned	3.15899	0.12651	0.438885	FALSE	ACVR2B_plus	FALSE	FALSE	FALSE	FALSE
chr3	38453889	38493142	ACVR2B	0	+	69	77	plus	146	-0.0273973	acp6_c2_rnaAligned	3.71946	0.562521	0.903204	FALSE	ACVR2B_plus	FALSE	FALSE	FALSE	FALSE
chr3	38453889	38493142	ACVR2B	0	+	59	40	plus	99	0.0959596	acp6_c5_rnaAligned	2.5221	0.0699006	0.346535	FALSE	ACVR2B_plus	FALSE	FALSE	FALSE	FALSE
chr3	38453889	38493142	ACVR2B	0	+	47	50	plus	97	-0.0154639	acp6_c6_rnaAligned	2.47115	0.839214	1	FALSE	ACVR2B_plus	FALSE	FALSE	FALSE	FALSE
chr3	38453889	38493142	ACVR2B	0	+	7	7	plus	14	0	acp7_c1_rnaAligned	0.356661	1	1	FALSE	ACVR2B_plus	FALSE	FALSE	FALSE	FALSE
chr3	38453889	38493142	ACVR2B	0	+	3	8	plus	11	-0.227273	acp7_c2_rnaAligned	0.280233	0.226562	0.612771	FALSE	ACVR2B_plus	TRUE	FALSE	FALSE	FALSE
chr3	38453889	38493142	ACVR2B	0	+	5	4	plus	9	0.0555556	acp7_c4_rnaAligned	0.229282	1	1	FALSE	ACVR2B_plus	FALSE	FALSE	FALSE	FALSE
chr12	51906943	51923361	ACVRL1	0	+	8	4	plus	12	0.166667	acp6_c2_rnaAligned	0.730905	0.387695	0.773776	FALSE	ACVRL1_plus	FALSE	FALSE	FALSE	FALSE
chr12	51906943	51923361	ACVRL1	0	+	8	3	plus	11	0.227273	acp7_c1_rnaAligned	0.669996	0.226562	0.643857	FALSE	ACVRL1_plus	TRUE	FALSE	FALSE	FALSE
chr12	51906943	51923361	ACVRL1	0	+	4	4	plus	8	0	acp7_c4_rnaAligned	0.48727	1	1	FALSE	ACVRL1_plus	FALSE	FALSE	FALSE	FALSE
chr14	75053242	75069490	ACYP1	0	-	23	24	minus	47	-0.0106383	acp6_c1_rnaAligned	2.89266	1	1	FALSE	ACYP1_minus	FALSE	FALSE	FALSE	FALSE
chr14	75053242	75069490	ACYP1	0	-	35	37	minus	72	-0.0138889	acp6_c2_rnaAligned	4.43131	0.906294	1	FALSE	ACYP1_minus	FALSE	FALSE	FALSE	FALSE
chr14	75053242	75069490	ACYP1	0	-	34	29	minus	63	0.0396825	acp6_c5_rnaAligned	3.8774	0.614655	0.944685	FALSE	ACYP1_minus	FALSE	FALSE	FALSE	FALSE
chr14	75053242	75069490	ACYP1	0	-	28	37	minus	65	-0.0692308	acp6_c6_rnaAligned	4.00049	0.321084	0.72968	FALSE	ACYP1_minus	FALSE	FALSE	FALSE	FALSE
chr2	53971112	54305300	ACYP2	0	+	132	128	plus	260	0.00769231	acp6_c1_rnaAligned	0.778005	0.852449	1	FALSE	ACYP2_plus	FALSE	FALSE	FALSE	FALSE
chr2	53971112	54305300	ACYP2	0	+	223	208	plus	431	0.0174014	acp6_c2_rnaAligned	1.28969	0.50013	0.866744	FALSE	ACYP2_plus	FALSE	FALSE	FALSE	FALSE
chr2	53971112	54305300	ACYP2	0	+	126	135	plus	261	-0.0172414	acp6_c5_rnaAligned	0.780998	0.620553	0.948974	FALSE	ACYP2_plus	FALSE	FALSE	FALSE	FALSE
chr2	53971112	54305300	ACYP2	0	+	201	211	plus	412	-0.0121359	acp6_c6_rnaAligned	1.23284	0.65753	0.950654	FALSE	ACYP2_plus	FALSE	FALSE	FALSE	FALSE
chr2	53971112	54305300	ACYP2	0	+	30	26	plus	56	0.0357143	acp7_c1_rnaAligned	0.16757	0.68888	0.995732	FALSE	ACYP2_plus	FALSE	FALSE	FALSE	FALSE
chr2	53971112	54305300	ACYP2	0	+	37	20	plus	57	0.149123	acp7_c2_rnaAligned	0.170563	0.033144	0.212095	FALSE	ACYP2_plus	FALSE	FALSE	FALSE	FALSE
chr2	53971112	54305300	ACYP2	0	+	20	26	plus	46	-0.0652174	acp7_c4_rnaAligned	0.137647	0.461391	0.85118	FALSE	ACYP2_plus	FALSE	FALSE	FALSE	FALSE
chr20	44619521	44651699	ADA	0	-	68	50	minus	118	0.0762712	acp6_c1_rnaAligned	3.6671	0.117213	0.422299	FALSE	ADA_minus	FALSE	FALSE	FALSE	FALSE
chr20	44619521	44651699	ADA	0	-	45	49	minus	94	-0.0212766	acp6_c2_rnaAligned	2.92125	0.757189	1	FALSE	ADA_minus	FALSE	FALSE	FALSE	FALSE
chr20	44619521	44651699	ADA	0	-	24	42	minus	66	-0.136364	acp6_c5_rnaAligned	2.05109	0.0355827	0.23012	FALSE	ADA_minus	FALSE	FALSE	FALSE	FALSE
chr20	44619521	44651699	ADA	0	-	72	59	minus	131	0.0496183	acp6_c6_rnaAligned	4.0711	0.294406	0.702341	FALSE	ADA_minus	FALSE	FALSE	FALSE	FALSE
chr22	17178789	17221848	ADA2	0	-	0	15	minus	15	-0.5	acp6_c5_rnaAligned	0.348359	6.1e-05	0.0016352	TRUE	ADA2_minus	TRUE	TRUE	TRUE	TRUE
chr22	17178789	17221848	ADA2	0	-	2	15	minus	17	-0.382353	acp7_c1_rnaAligned	0.394807	0.00234985	0.0335511	TRUE	ADA2_minus	TRUE	TRUE	FALSE	FALSE
chr22	17178789	17221848	ADA2	0	-	3	8	minus	11	-0.227273	acp7_c4_rnaAligned	0.255463	0.226562	0.633004	FALSE	ADA2_minus	TRUE	FALSE	FALSE	FALSE
chr15	58588808	58749707	ADAM10	0	-	255	322	minus	577	-0.0580589	acp6_c1_rnaAligned	3.5861	0.0059554	0.0564325	FALSE	ADAM10_minus	FALSE	FALSE	FALSE	FALSE
chr15	58588808	58749707	ADAM10	0	-	219	333	minus	552	-0.103261	acp6_c2_rnaAligned	3.43072	1.39e-06	3.96e-05	TRUE	ADAM10_minus	FALSE	FALSE	FALSE	FALSE
chr15	58588808	58749707	ADAM10	0	-	156	202	minus	358	-0.0642458	acp6_c5_rnaAligned	2.225	0.0172697	0.143419	FALSE	ADAM10_minus	FALSE	FALSE	FALSE	FALSE
chr15	58588808	58749707	ADAM10	0	-	244	297	minus	541	-0.0489834	acp6_c6_rnaAligned	3.36236	0.025284	0.171074	FALSE	ADAM10_minus	FALSE	FALSE	FALSE	FALSE
chr15	58588808	58749707	ADAM10	0	-	289	370	minus	659	-0.0614568	acp7_c1_rnaAligned	4.09574	0.00180968	0.0274187	TRUE	ADAM10_minus	FALSE	FALSE	FALSE	FALSE
chr15	58588808	58749707	ADAM10	0	-	319	358	minus	677	-0.0288035	acp7_c2_rnaAligned	4.20761	0.144108	0.496618	FALSE	ADAM10_minus	FALSE	FALSE	FALSE	FALSE
chr15	58588808	58749707	ADAM10	0	-	222	322	minus	544	-0.0919118	acp7_c4_rnaAligned	3.381	2.08e-05	0.00054693	TRUE	ADAM10_minus	FALSE	FALSE	FALSE	FALSE
chr17	44758987	44781846	ADAM11	0	+	7	6	plus	13	0.0384615	acp7_c1_rnaAligned	0.568704	1	1	FALSE	ADAM11_plus	FALSE	FALSE	FALSE	FALSE
chr10	126012390	126388477	ADAM12	0	-	561	494	minus	1055	0.0317535	acp6_c1_rnaAligned	2.8052	0.0421056	0.225655	FALSE	ADAM12_minus	FALSE	FALSE	FALSE	FALSE
chr10	126012390	126388477	ADAM12	0	-	200	243	minus	443	-0.0485327	acp6_c2_rnaAligned	1.17792	0.0458684	0.239852	FALSE	ADAM12_minus	FALSE	FALSE	FALSE	FALSE
chr10	126012390	126388477	ADAM12	0	-	267	350	minus	617	-0.0672609	acp6_c5_rnaAligned	1.64058	0.00094761	0.0155412	TRUE	ADAM12_minus	FALSE	FALSE	FALSE	FALSE
chr10	126012390	126388477	ADAM12	0	-	511	583	minus	1094	-0.0329068	acp6_c6_rnaAligned	2.9089	0.0317787	0.199207	FALSE	ADAM12_minus	FALSE	FALSE	FALSE	FALSE
chr10	126012390	126388477	ADAM12	0	-	318	393	minus	711	-0.0527426	acp7_c1_rnaAligned	1.89052	0.00547949	0.0636597	FALSE	ADAM12_minus	FALSE	FALSE	FALSE	FALSE
chr10	126012390	126388477	ADAM12	0	-	169	198	minus	367	-0.0395095	acp7_c2_rnaAligned	0.975838	0.143751	0.496179	FALSE	ADAM12_minus	FALSE	FALSE	FALSE	FALSE
chr10	126012390	126388477	ADAM12	0	-	238	298	minus	536	-0.0559701	acp7_c4_rnaAligned	1.4252	0.0107538	0.0983473	FALSE	ADAM12_minus	FALSE	FALSE	FALSE	FALSE
chr1	155051315	155062775	ADAM15	0	+	594	677	plus	1271	-0.0326515	acp7_c1_rnaAligned	110.908	0.0214076	0.168986	FALSE	ADAM15_plus	FALSE	FALSE	FALSE	FALSE
chr1	155051315	155062775	ADAM15	0	+	352	332	plus	684	0.0146199	acp7_c2_rnaAligned	59.6859	0.467568	0.851128	FALSE	ADAM15_plus	FALSE	FALSE	FALSE	FALSE
chr1	155051315	155062775	ADAM15	0	+	490	503	plus	993	-0.0065458	acp7_c4_rnaAligned	86.6492	0.703366	0.994357	FALSE	ADAM15_plus	FALSE	FALSE	FALSE	FALSE
chr2	9488485	9555830	ADAM17	0	-	275	300	minus	575	-0.0217391	acp6_c1_rnaAligned	8.53812	0.31689	0.707965	FALSE	ADAM17_minus	FALSE	FALSE	FALSE	FALSE
chr2	9488485	9555830	ADAM17	0	-	347	374	minus	721	-0.018724	acp6_c2_rnaAligned	10.7061	0.332903	0.72537	FALSE	ADAM17_minus	FALSE	FALSE	FALSE	FALSE
chr2	9488485	9555830	ADAM17	0	-	233	217	minus	450	0.0177778	acp6_c5_rnaAligned	6.68201	0.479541	0.869653	FALSE	ADAM17_minus	FALSE	FALSE	FALSE	FALSE
chr2	9488485	9555830	ADAM17	0	-	334	364	minus	698	-0.02149	acp6_c6_rnaAligned	10.3645	0.272339	0.677683	FALSE	ADAM17_minus	FALSE	FALSE	FALSE	FALSE
chr2	9488485	9555830	ADAM17	0	-	423	373	minus	796	0.031407	acp7_c1_rnaAligned	11.8197	0.082365	0.388473	FALSE	ADAM17_minus	FALSE	FALSE	FALSE	FALSE
chr2	9488485	9555830	ADAM17	0	-	291	266	minus	557	0.0224417	acp7_c2_rnaAligned	8.27084	0.309193	0.7009	FALSE	ADAM17_minus	FALSE	FALSE	FALSE	FALSE
chr2	9488485	9555830	ADAM17	0	-	299	335	minus	634	-0.0283912	acp7_c4_rnaAligned	9.41421	0.164469	0.544726	FALSE	ADAM17_minus	FALSE	FALSE	FALSE	FALSE
chr5	157477303	157575775	ADAM19	0	-	309	319	minus	628	-0.0079618	acp6_c1_rnaAligned	6.37745	0.719522	0.983707	FALSE	ADAM19_minus	FALSE	FALSE	FALSE	FALSE
chr5	157477303	157575775	ADAM19	0	-	290	308	minus	598	-0.0150502	acp6_c2_rnaAligned	6.07279	0.486973	0.855405	FALSE	ADAM19_minus	FALSE	FALSE	FALSE	FALSE
chr5	157477303	157575775	ADAM19	0	-	225	268	minus	493	-0.0436105	acp6_c5_rnaAligned	5.0065	0.0584363	0.311196	FALSE	ADAM19_minus	FALSE	FALSE	FALSE	FALSE
chr5	157477303	157575775	ADAM19	0	-	470	523	minus	993	-0.0266868	acp6_c6_rnaAligned	10.0841	0.0988593	0.401957	FALSE	ADAM19_minus	FALSE	FALSE	FALSE	FALSE
chr5	157477303	157575775	ADAM19	0	-	477	549	minus	1026	-0.0350877	acp7_c1_rnaAligned	10.4192	0.0266031	0.192534	FALSE	ADAM19_minus	FALSE	FALSE	FALSE	FALSE
chr5	157477303	157575775	ADAM19	0	-	337	342	minus	679	-0.0036819	acp7_c2_rnaAligned	6.89536	0.878014	1	FALSE	ADAM19_minus	FALSE	FALSE	FALSE	FALSE
chr5	157477303	157575775	ADAM19	0	-	387	368	minus	755	0.0125828	acp7_c4_rnaAligned	7.66715	0.512438	0.88265	FALSE	ADAM19_minus	FALSE	FALSE	FALSE	FALSE
chr14	70522357	70579452	ADAM20	0	-	91	61	minus	152	0.0986842	acp6_c1_rnaAligned	2.66223	0.0183674	0.130052	FALSE	ADAM20_minus	FALSE	FALSE	FALSE	FALSE
chr14	70522357	70579452	ADAM20	0	-	138	73	minus	211	0.154028	acp6_c2_rnaAligned	3.6956	9.03e-06	0.00021774	TRUE	ADAM20_minus	FALSE	FALSE	FALSE	FALSE
chr14	70522357	70579452	ADAM20	0	-	82	58	minus	140	0.0857143	acp6_c5_rnaAligned	2.45205	0.0515236	0.29179	FALSE	ADAM20_minus	FALSE	FALSE	FALSE	FALSE
chr14	70522357	70579452	ADAM20	0	-	97	67	minus	164	0.0914634	acp6_c6_rnaAligned	2.87241	0.023249	0.162232	FALSE	ADAM20_minus	FALSE	FALSE	FALSE	FALSE
chr14	70522357	70579452	ADAM20	0	-	77	66	minus	143	0.0384615	acp7_c1_rnaAligned	2.5046	0.403104	0.818223	FALSE	ADAM20_minus	FALSE	FALSE	FALSE	FALSE
chr14	70522357	70579452	ADAM20	0	-	63	64	minus	127	-0.003937	acp7_c2_rnaAligned	2.22436	1	1	FALSE	ADAM20_minus	FALSE	FALSE	FALSE	FALSE
chr14	70522357	70579452	ADAM20	0	-	41	47	minus	88	-0.0340909	acp7_c4_rnaAligned	1.54129	0.594288	0.932722	FALSE	ADAM20_minus	FALSE	FALSE	FALSE	FALSE
chr14	70452173	70459905	ADAM21	0	+	5	7	plus	12	-0.0833333	acp6_c2_rnaAligned	1.55199	0.774414	1	FALSE	ADAM21_plus	FALSE	FALSE	FALSE	FALSE
chr14	70452173	70459905	ADAM21	0	+	6	3	plus	9	0.166667	acp7_c4_rnaAligned	1.16399	0.507812	0.880867	FALSE	ADAM21_plus	FALSE	FALSE	FALSE	FALSE
chr7	87934250	88202889	ADAM22	0	+	8	4	plus	12	0.166667	acp6_c1_rnaAligned	0.0446696	0.387695	0.767418	FALSE	ADAM22_plus	FALSE	FALSE	FALSE	FALSE
chr7	87934250	88202889	ADAM22	0	+	5	7	plus	12	-0.0833333	acp6_c5_rnaAligned	0.0446696	0.774414	1	FALSE	ADAM22_plus	FALSE	FALSE	FALSE	FALSE
chr7	87934250	88202889	ADAM22	0	+	7	3	plus	10	0.2	acp7_c1_rnaAligned	0.0372247	0.34375	0.769737	FALSE	ADAM22_plus	FALSE	FALSE	FALSE	FALSE
chr7	87934250	88202889	ADAM22	0	+	6	2	plus	8	0.25	acp7_c4_rnaAligned	0.0297797	0.289062	0.697154	FALSE	ADAM22_plus	TRUE	FALSE	FALSE	FALSE
chr2	206443531	206621127	ADAM23	0	+	18	1	plus	19	0.447368	acp6_c1_rnaAligned	0.106984	7.63e-05	0.00143073	TRUE	ADAM23_plus	TRUE	TRUE	TRUE	FALSE
chr2	206443531	206621127	ADAM23	0	+	37	5	plus	42	0.380952	acp6_c2_rnaAligned	0.236492	4.43e-07	1.39e-05	TRUE	ADAM23_plus	TRUE	TRUE	FALSE	FALSE
chr2	206443531	206621127	ADAM23	0	+	35	2	plus	37	0.445946	acp6_c5_rnaAligned	0.208338	1.02e-08	5.27e-07	TRUE	ADAM23_plus	TRUE	TRUE	TRUE	FALSE
chr2	206443531	206621127	ADAM23	0	+	40	14	plus	54	0.240741	acp6_c6_rnaAligned	0.304061	0.00053544	0.00915894	TRUE	ADAM23_plus	TRUE	FALSE	FALSE	FALSE
chr2	206443531	206621127	ADAM23	0	+	65	20	plus	85	0.264706	acp7_c1_rnaAligned	0.478614	1.03e-06	4e-05	TRUE	ADAM23_plus	TRUE	FALSE	FALSE	FALSE
chr2	206443531	206621127	ADAM23	0	+	18	0	plus	18	0.5	acp7_c2_rnaAligned	0.101354	7.63e-06	0.00022057	TRUE	ADAM23_plus	TRUE	TRUE	TRUE	TRUE
chr2	206443531	206621127	ADAM23	0	+	10	4	plus	14	0.214286	acp7_c4_rnaAligned	0.0788306	0.179565	0.555239	FALSE	ADAM23_plus	TRUE	FALSE	FALSE	FALSE
chr8	24294068	24359014	ADAM28	0	+	32	25	plus	57	0.0614035	acp6_c2_rnaAligned	0.877652	0.427043	0.807215	FALSE	ADAM28_plus	FALSE	FALSE	FALSE	FALSE
chr8	24294068	24359014	ADAM28	0	+	6	4	plus	10	0.1	acp6_c5_rnaAligned	0.153974	0.753906	0.997325	FALSE	ADAM28_plus	FALSE	FALSE	FALSE	FALSE
chr8	24294068	24359014	ADAM28	0	+	4	7	plus	11	-0.136364	acp6_c6_rnaAligned	0.169371	0.548828	0.89401	FALSE	ADAM28_plus	FALSE	FALSE	FALSE	FALSE
chr8	24294068	24359014	ADAM28	0	+	3	7	plus	10	-0.2	acp7_c4_rnaAligned	0.153974	0.34375	0.751888	FALSE	ADAM28_plus	FALSE	FALSE	FALSE	FALSE
chr20	3667974	3682010	ADAM33	0	-	440	292	minus	732	0.101093	acp6_c1_rnaAligned	52.1516	5e-08	1.7e-06	TRUE	ADAM33_minus	FALSE	FALSE	FALSE	FALSE
chr20	3667974	3682010	ADAM33	0	-	299	292	minus	591	0.00592217	acp6_c2_rnaAligned	42.106	0.805083	1	FALSE	ADAM33_minus	FALSE	FALSE	FALSE	FALSE
chr20	3667974	3682010	ADAM33	0	-	432	467	minus	899	-0.0194661	acp6_c5_rnaAligned	64.0496	0.256797	0.684472	FALSE	ADAM33_minus	FALSE	FALSE	FALSE	FALSE
chr20	3667974	3682010	ADAM33	0	-	357	398	minus	755	-0.0271523	acp6_c6_rnaAligned	53.7903	0.145412	0.495367	FALSE	ADAM33_minus	FALSE	FALSE	FALSE	FALSE
chr20	3667974	3682010	ADAM33	0	-	160	312	minus	472	-0.161017	acp7_c1_rnaAligned	33.6278	2.37e-12	1.74e-10	TRUE	ADAM33_minus	FALSE	FALSE	FALSE	FALSE
chr20	3667974	3682010	ADAM33	0	-	205	307	minus	512	-0.0996094	acp7_c2_rnaAligned	36.4776	7.55e-06	0.00022057	TRUE	ADAM33_minus	FALSE	FALSE	FALSE	FALSE
chr20	3667974	3682010	ADAM33	0	-	336	229	minus	565	0.0946903	acp7_c4_rnaAligned	40.2536	7.75e-06	0.00022317	TRUE	ADAM33_minus	FALSE	FALSE	FALSE	FALSE
chr8	38996972	39105261	ADAM9	0	+	36	24	plus	60	0.1	acp6_c1_rnaAligned	0.554073	0.155002	0.493271	FALSE	ADAM9_plus	FALSE	FALSE	FALSE	FALSE
chr8	38996972	39105261	ADAM9	0	+	38	32	plus	70	0.0428571	acp6_c2_rnaAligned	0.646418	0.550413	0.895009	FALSE	ADAM9_plus	FALSE	FALSE	FALSE	FALSE
chr8	38996972	39105261	ADAM9	0	+	25	23	plus	48	0.0208333	acp6_c5_rnaAligned	0.443258	0.885433	1	FALSE	ADAM9_plus	FALSE	FALSE	FALSE	FALSE
chr8	38996972	39105261	ADAM9	0	+	50	32	plus	82	0.109756	acp6_c6_rnaAligned	0.757233	0.0598083	0.303151	FALSE	ADAM9_plus	FALSE	FALSE	FALSE	FALSE
chr8	38996972	39105261	ADAM9	0	+	174	156	plus	330	0.0272727	acp7_c1_rnaAligned	3.0474	0.349382	0.772952	FALSE	ADAM9_plus	FALSE	FALSE	FALSE	FALSE
chr8	38996972	39105261	ADAM9	0	+	126	169	plus	295	-0.0728814	acp7_c2_rnaAligned	2.72419	0.0143334	0.119494	FALSE	ADAM9_plus	FALSE	FALSE	FALSE	FALSE
chr8	38996972	39105261	ADAM9	0	+	116	81	plus	197	0.0888325	acp7_c4_rnaAligned	1.81921	0.0152059	0.125853	FALSE	ADAM9_plus	FALSE	FALSE	FALSE	FALSE
chr21	26835754	26845409	ADAMTS1	0	-	25	29	minus	54	-0.037037	acp6_c1_rnaAligned	5.59296	0.683489	0.962821	FALSE	ADAMTS1_minus	FALSE	FALSE	FALSE	FALSE
chr21	26835754	26845409	ADAMTS1	0	-	122	130	minus	252	-0.015873	acp6_c2_rnaAligned	26.1005	0.659329	0.955895	FALSE	ADAMTS1_minus	FALSE	FALSE	FALSE	FALSE
chr21	26835754	26845409	ADAMTS1	0	-	33	42	minus	75	-0.06	acp6_c5_rnaAligned	7.768	0.355699	0.784946	FALSE	ADAMTS1_minus	FALSE	FALSE	FALSE	FALSE
chr21	26835754	26845409	ADAMTS1	0	-	50	53	minus	103	-0.0145631	acp6_c6_rnaAligned	10.668	0.843898	1	FALSE	ADAMTS1_minus	FALSE	FALSE	FALSE	FALSE
chr21	26835754	26845409	ADAMTS1	0	-	585	841	minus	1426	-0.0897616	acp7_c1_rnaAligned	147.695	1.28e-11	8.65e-10	TRUE	ADAMTS1_minus	FALSE	FALSE	FALSE	FALSE
chr21	26835754	26845409	ADAMTS1	0	-	232	432	minus	664	-0.150602	acp7_c2_rnaAligned	68.7727	7.17e-15	5.75e-13	TRUE	ADAMTS1_minus	FALSE	FALSE	FALSE	FALSE
chr21	26835754	26845409	ADAMTS1	0	-	134	274	minus	408	-0.171569	acp7_c4_rnaAligned	42.2579	3.66e-12	2.36e-10	TRUE	ADAMTS1_minus	FALSE	FALSE	FALSE	FALSE
chr19	8580239	8610715	ADAMTS10	0	-	20	18	minus	38	0.0263158	acp6_c1_rnaAligned	1.24688	0.871415	1	FALSE	ADAMTS10_minus	FALSE	FALSE	FALSE	FALSE
chr19	8580239	8610715	ADAMTS10	0	-	9	19	minus	28	-0.178571	acp6_c2_rnaAligned	0.918756	0.0871586	0.356645	FALSE	ADAMTS10_minus	FALSE	FALSE	FALSE	FALSE
chr19	8580239	8610715	ADAMTS10	0	-	11	21	minus	32	-0.15625	acp6_c5_rnaAligned	1.05001	0.110184	0.441357	FALSE	ADAMTS10_minus	FALSE	FALSE	FALSE	FALSE
chr19	8580239	8610715	ADAMTS10	0	-	33	19	minus	52	0.134615	acp6_c6_rnaAligned	1.70626	0.0703942	0.338123	FALSE	ADAMTS10_minus	FALSE	FALSE	FALSE	FALSE
chr19	8580239	8610715	ADAMTS10	0	-	10	14	minus	24	-0.0833333	acp7_c1_rnaAligned	0.787505	0.541256	0.912979	FALSE	ADAMTS10_minus	FALSE	FALSE	FALSE	FALSE
chr19	8580239	8610715	ADAMTS10	0	-	7	14	minus	21	-0.166667	acp7_c2_rnaAligned	0.689067	0.189247	0.559227	FALSE	ADAMTS10_minus	FALSE	FALSE	FALSE	FALSE
chr19	8580239	8610715	ADAMTS10	0	-	6	12	minus	18	-0.166667	acp7_c4_rnaAligned	0.590629	0.237885	0.64156	FALSE	ADAMTS10_minus	FALSE	FALSE	FALSE	FALSE
chr5	33523534	33891990	ADAMTS12	0	-	240	237	minus	477	0.00314465	acp6_c1_rnaAligned	1.29459	0.927049	1	FALSE	ADAMTS12_minus	FALSE	FALSE	FALSE	FALSE
chr5	33523534	33891990	ADAMTS12	0	-	123	140	minus	263	-0.0323194	acp6_c2_rnaAligned	0.713789	0.323843	0.720049	FALSE	ADAMTS12_minus	FALSE	FALSE	FALSE	FALSE
chr5	33523534	33891990	ADAMTS12	0	-	162	188	minus	350	-0.0371429	acp6_c5_rnaAligned	0.94991	0.181368	0.579982	FALSE	ADAMTS12_minus	FALSE	FALSE	FALSE	FALSE
chr5	33523534	33891990	ADAMTS12	0	-	271	220	minus	491	0.0519348	acp6_c6_rnaAligned	1.33259	0.0239431	0.165262	FALSE	ADAMTS12_minus	FALSE	FALSE	FALSE	FALSE
chr5	33523534	33891990	ADAMTS12	0	-	1195	812	minus	2007	0.095416	acp7_c1_rnaAligned	5.44705	1.2e-17	1.27e-15	TRUE	ADAMTS12_minus	FALSE	FALSE	FALSE	FALSE
chr5	33523534	33891990	ADAMTS12	0	-	303	234	minus	537	0.0642458	acp7_c2_rnaAligned	1.45743	0.00330441	0.040164	TRUE	ADAMTS12_minus	FALSE	FALSE	FALSE	FALSE
chr5	33523534	33891990	ADAMTS12	0	-	366	269	minus	635	0.076378	acp7_c4_rnaAligned	1.72341	0.00013538	0.00286252	TRUE	ADAMTS12_minus	FALSE	FALSE	FALSE	FALSE
chr9	133418079	133459386	ADAMTS13	0	+	29	41	plus	70	-0.0857143	acp6_c1_rnaAligned	1.69463	0.188216	0.547631	FALSE	ADAMTS13_plus	FALSE	FALSE	FALSE	FALSE
chr9	133418079	133459386	ADAMTS13	0	+	44	55	plus	99	-0.0555556	acp6_c2_rnaAligned	2.39669	0.31488	0.707676	FALSE	ADAMTS13_plus	FALSE	FALSE	FALSE	FALSE
chr9	133418079	133459386	ADAMTS13	0	+	31	34	plus	65	-0.0230769	acp6_c5_rnaAligned	1.57358	0.804317	1	FALSE	ADAMTS13_plus	FALSE	FALSE	FALSE	FALSE
chr9	133418079	133459386	ADAMTS13	0	+	43	50	plus	93	-0.0376344	acp6_c6_rnaAligned	2.25143	0.53406	0.892296	FALSE	ADAMTS13_plus	FALSE	FALSE	FALSE	FALSE
chr10	70672505	70762441	ADAMTS14	0	+	341	288	plus	629	0.0421304	acp6_c1_rnaAligned	6.99386	0.038053	0.2127	FALSE	ADAMTS14_plus	FALSE	FALSE	FALSE	FALSE
chr10	70672505	70762441	ADAMTS14	0	+	99	148	plus	247	-0.0991903	acp6_c2_rnaAligned	2.7464	0.00219229	0.027012	TRUE	ADAMTS14_plus	FALSE	FALSE	FALSE	FALSE
chr10	70672505	70762441	ADAMTS14	0	+	119	112	plus	231	0.0151515	acp6_c5_rnaAligned	2.56849	0.693101	0.975947	FALSE	ADAMTS14_plus	FALSE	FALSE	FALSE	FALSE
chr10	70672505	70762441	ADAMTS14	0	+	406	464	plus	870	-0.0333333	acp6_c6_rnaAligned	9.67355	0.0532377	0.28405	FALSE	ADAMTS14_plus	FALSE	FALSE	FALSE	FALSE
chr10	70672505	70762441	ADAMTS14	0	+	48	47	plus	95	0.00526316	acp7_c1_rnaAligned	1.05631	1	1	FALSE	ADAMTS14_plus	FALSE	FALSE	FALSE	FALSE
chr10	70672505	70762441	ADAMTS14	0	+	29	76	plus	105	-0.223809	acp7_c2_rnaAligned	1.1675	5.05e-06	0.00015316	TRUE	ADAMTS14_plus	TRUE	FALSE	FALSE	FALSE
chr10	70672505	70762441	ADAMTS14	0	+	13	29	plus	42	-0.190476	acp7_c4_rnaAligned	0.466999	0.0195205	0.153245	FALSE	ADAMTS14_plus	FALSE	FALSE	FALSE	FALSE
chr11	130448644	130476645	ADAMTS15	0	+	7	5	plus	12	0.0833333	acp6_c2_rnaAligned	0.428556	0.774414	1	FALSE	ADAMTS15_plus	FALSE	FALSE	FALSE	FALSE
chr11	130448644	130476645	ADAMTS15	0	+	4	9	plus	13	-0.192308	acp7_c1_rnaAligned	0.464269	0.266846	0.695731	FALSE	ADAMTS15_plus	FALSE	FALSE	FALSE	FALSE
chr5	5140329	5320304	ADAMTS16	0	+	10	28	plus	38	-0.236842	acp6_c1_rnaAligned	0.21114	0.00509764	0.0494699	TRUE	ADAMTS16_plus	TRUE	FALSE	FALSE	FALSE
chr5	5140329	5320304	ADAMTS16	0	+	1	11	plus	12	-0.416667	acp6_c2_rnaAligned	0.0666759	0.00634766	0.0605554	FALSE	ADAMTS16_plus	TRUE	TRUE	TRUE	FALSE
chr5	5140329	5320304	ADAMTS16	0	+	6	6	plus	12	0	acp6_c5_rnaAligned	0.0666759	1	1	FALSE	ADAMTS16_plus	FALSE	FALSE	FALSE	FALSE
chr5	5140329	5320304	ADAMTS16	0	+	26	23	plus	49	0.0306122	acp6_c6_rnaAligned	0.27226	0.77545	0.999495	FALSE	ADAMTS16_plus	FALSE	FALSE	FALSE	FALSE
chr5	5140329	5320304	ADAMTS16	0	+	8	1	plus	9	0.388889	acp7_c2_rnaAligned	0.050007	0.0390625	0.233194	FALSE	ADAMTS16_plus	TRUE	TRUE	FALSE	FALSE
chr5	5140329	5320304	ADAMTS16	0	+	11	3	plus	14	0.285714	acp7_c4_rnaAligned	0.0777886	0.0573731	0.309463	FALSE	ADAMTS16_plus	TRUE	FALSE	FALSE	FALSE
chr15	99971436	100341975	ADAMTS17	0	-	55	63	minus	118	-0.0338983	acp6_c1_rnaAligned	0.318455	0.519491	0.86737	FALSE	ADAMTS17_minus	FALSE	FALSE	FALSE	FALSE
chr15	99971436	100341975	ADAMTS17	0	-	324	285	minus	609	0.0320197	acp6_c2_rnaAligned	1.64355	0.123529	0.43082	FALSE	ADAMTS17_minus	FALSE	FALSE	FALSE	FALSE
chr15	99971436	100341975	ADAMTS17	0	-	102	76	minus	178	0.0730337	acp6_c5_rnaAligned	0.480381	0.0606494	0.319717	FALSE	ADAMTS17_minus	FALSE	FALSE	FALSE	FALSE
chr15	99971436	100341975	ADAMTS17	0	-	147	198	minus	345	-0.073913	acp6_c6_rnaAligned	0.931076	0.00701775	0.0701945	FALSE	ADAMTS17_minus	FALSE	FALSE	FALSE	FALSE
chr15	99971436	100341975	ADAMTS17	0	-	341	266	minus	607	0.0617792	acp7_c1_rnaAligned	1.63815	0.00263933	0.0365086	TRUE	ADAMTS17_minus	FALSE	FALSE	FALSE	FALSE
chr15	99971436	100341975	ADAMTS17	0	-	991	1138	minus	2129	-0.0345233	acp7_c2_rnaAligned	5.74568	0.00154909	0.0223927	TRUE	ADAMTS17_minus	FALSE	FALSE	FALSE	FALSE
chr15	99971436	100341975	ADAMTS17	0	-	1277	952	minus	2229	0.0729026	acp7_c4_rnaAligned	6.01556	6.22e-12	3.94e-10	TRUE	ADAMTS17_minus	FALSE	FALSE	FALSE	FALSE
chr5	179110852	179345461	ADAMTS2	0	-	473	108	minus	581	0.314114	acp6_c1_rnaAligned	2.47646	2.04e-55	4.44e-53	TRUE	ADAMTS2_minus	TRUE	TRUE	FALSE	FALSE
chr5	179110852	179345461	ADAMTS2	0	-	625	149	minus	774	0.307494	acp6_c2_rnaAligned	3.29911	4.34e-70	1.18e-67	TRUE	ADAMTS2_minus	TRUE	TRUE	FALSE	FALSE
chr5	179110852	179345461	ADAMTS2	0	-	397	119	minus	516	0.26938	acp6_c5_rnaAligned	2.1994	5.76e-36	9.58e-34	TRUE	ADAMTS2_minus	TRUE	FALSE	FALSE	FALSE
chr5	179110852	179345461	ADAMTS2	0	-	643	342	minus	985	0.152792	acp6_c6_rnaAligned	4.19847	5.72e-22	6.56e-20	TRUE	ADAMTS2_minus	FALSE	FALSE	FALSE	FALSE
chr5	179110852	179345461	ADAMTS2	0	-	34	220	minus	254	-0.366142	acp7_c1_rnaAligned	1.08265	1.59e-34	3.62e-32	TRUE	ADAMTS2_minus	TRUE	TRUE	FALSE	FALSE
chr5	179110852	179345461	ADAMTS2	0	-	60	144	minus	204	-0.205882	acp7_c2_rnaAligned	0.869532	3.77e-09	1.77e-07	TRUE	ADAMTS2_minus	TRUE	FALSE	FALSE	FALSE
chr5	179110852	179345461	ADAMTS2	0	-	44	28	minus	72	0.111111	acp7_c4_rnaAligned	0.306894	0.0763691	0.361342	FALSE	ADAMTS2_minus	FALSE	FALSE	FALSE	FALSE
chr4	72280968	72569221	ADAMTS3	0	-	9	9	minus	18	0	acp6_c1_rnaAligned	0.0624451	1	1	FALSE	ADAMTS3_minus	FALSE	FALSE	FALSE	FALSE
chr4	72280968	72569221	ADAMTS3	0	-	17	13	minus	30	0.0666667	acp6_c2_rnaAligned	0.104075	0.584665	0.911242	FALSE	ADAMTS3_minus	FALSE	FALSE	FALSE	FALSE
chr4	72280968	72569221	ADAMTS3	0	-	6	5	minus	11	0.0454546	acp6_c5_rnaAligned	0.0381609	1	1	FALSE	ADAMTS3_minus	FALSE	FALSE	FALSE	FALSE
chr4	72280968	72569221	ADAMTS3	0	-	7	9	minus	16	-0.0625	acp6_c6_rnaAligned	0.0555068	0.803619	1	FALSE	ADAMTS3_minus	FALSE	FALSE	FALSE	FALSE
chr4	72280968	72569221	ADAMTS3	0	-	25	34	minus	59	-0.0762712	acp7_c1_rnaAligned	0.204681	0.297595	0.726337	FALSE	ADAMTS3_minus	FALSE	FALSE	FALSE	FALSE
chr4	72280968	72569221	ADAMTS3	0	-	25	26	minus	51	-0.0098039	acp7_c2_rnaAligned	0.176928	1	1	FALSE	ADAMTS3_minus	FALSE	FALSE	FALSE	FALSE
chr4	72280968	72569221	ADAMTS3	0	-	5	12	minus	17	-0.205882	acp7_c4_rnaAligned	0.058976	0.143463	0.509413	FALSE	ADAMTS3_minus	TRUE	FALSE	FALSE	FALSE
chr1	161184301	161199054	ADAMTS4	0	-	17	14	minus	31	0.0483871	acp6_c1_rnaAligned	2.10127	0.7201	0.983707	FALSE	ADAMTS4_minus	FALSE	FALSE	FALSE	FALSE
chr1	161184301	161199054	ADAMTS4	0	-	10	11	minus	21	-0.0238095	acp6_c2_rnaAligned	1.42344	1	1	FALSE	ADAMTS4_minus	FALSE	FALSE	FALSE	FALSE
chr1	161184301	161199054	ADAMTS4	0	-	22	9	minus	31	0.209677	acp6_c5_rnaAligned	2.10127	0.0294494	0.204784	FALSE	ADAMTS4_minus	TRUE	FALSE	FALSE	FALSE
chr1	161184301	161199054	ADAMTS4	0	-	10	12	minus	22	-0.0454545	acp6_c6_rnaAligned	1.49122	0.831812	1	FALSE	ADAMTS4_minus	FALSE	FALSE	FALSE	FALSE
chr1	161184301	161199054	ADAMTS4	0	-	8	3	minus	11	0.227273	acp7_c4_rnaAligned	0.745611	0.226562	0.633004	FALSE	ADAMTS4_minus	TRUE	FALSE	FALSE	FALSE
chr21	26917921	26967088	ADAMTS5	0	-	239	221	minus	460	0.0195652	acp6_c1_rnaAligned	9.35587	0.428025	0.797252	FALSE	ADAMTS5_minus	FALSE	FALSE	FALSE	FALSE
chr21	26917921	26967088	ADAMTS5	0	-	335	288	minus	623	0.0377207	acp6_c2_rnaAligned	12.6711	0.0652498	0.297132	FALSE	ADAMTS5_minus	FALSE	FALSE	FALSE	FALSE
chr21	26917921	26967088	ADAMTS5	0	-	137	122	minus	259	0.0289575	acp6_c5_rnaAligned	5.26776	0.384383	0.801445	FALSE	ADAMTS5_minus	FALSE	FALSE	FALSE	FALSE
chr21	26917921	26967088	ADAMTS5	0	-	436	386	minus	822	0.0304136	acp6_c6_rnaAligned	16.7185	0.0873761	0.378921	FALSE	ADAMTS5_minus	FALSE	FALSE	FALSE	FALSE
chr21	26917921	26967088	ADAMTS5	0	-	355	216	minus	571	0.121716	acp7_c1_rnaAligned	11.6135	6.51e-09	3.45e-07	TRUE	ADAMTS5_minus	FALSE	FALSE	FALSE	FALSE
chr21	26917921	26967088	ADAMTS5	0	-	493	324	minus	817	0.103427	acp7_c2_rnaAligned	16.6168	3.68e-09	1.74e-07	TRUE	ADAMTS5_minus	FALSE	FALSE	FALSE	FALSE
chr21	26917921	26967088	ADAMTS5	0	-	143	134	minus	277	0.0162455	acp7_c4_rnaAligned	5.63386	0.630828	0.947856	FALSE	ADAMTS5_minus	FALSE	FALSE	FALSE	FALSE
chr5	65148737	65481920	ADAMTS6	0	-	152	131	minus	283	0.0371025	acp6_c1_rnaAligned	0.849383	0.234432	0.61095	FALSE	ADAMTS6_minus	FALSE	FALSE	FALSE	FALSE
chr5	65148737	65481920	ADAMTS6	0	-	222	267	minus	489	-0.0460123	acp6_c2_rnaAligned	1.46766	0.0465079	0.24206	FALSE	ADAMTS6_minus	FALSE	FALSE	FALSE	FALSE
chr5	65148737	65481920	ADAMTS6	0	-	213	189	minus	402	0.0298507	acp6_c5_rnaAligned	1.20654	0.251295	0.676098	FALSE	ADAMTS6_minus	FALSE	FALSE	FALSE	FALSE
chr5	65148737	65481920	ADAMTS6	0	-	294	341	minus	635	-0.0370079	acp6_c6_rnaAligned	1.90586	0.0678482	0.328583	FALSE	ADAMTS6_minus	FALSE	FALSE	FALSE	FALSE
chr5	65148737	65481920	ADAMTS6	0	-	1643	1562	minus	3205	0.0126365	acp7_c1_rnaAligned	9.61934	0.157613	0.547743	FALSE	ADAMTS6_minus	FALSE	FALSE	FALSE	FALSE
chr5	65148737	65481920	ADAMTS6	0	-	1108	850	minus	1958	0.0658835	acp7_c2_rnaAligned	5.87665	6.02e-09	2.75e-07	TRUE	ADAMTS6_minus	FALSE	FALSE	FALSE	FALSE
chr5	65148737	65481920	ADAMTS6	0	-	1542	1610	minus	3152	-0.0107868	acp7_c4_rnaAligned	9.46027	0.232712	0.636487	FALSE	ADAMTS6_minus	FALSE	FALSE	FALSE	FALSE
chr15	78759205	78811464	ADAMTS7	0	-	125	115	minus	240	0.0208333	acp6_c1_rnaAligned	4.59251	0.561367	0.893061	FALSE	ADAMTS7_minus	FALSE	FALSE	FALSE	FALSE
chr15	78759205	78811464	ADAMTS7	0	-	55	74	minus	129	-0.0736434	acp6_c2_rnaAligned	2.46847	0.112657	0.411948	FALSE	ADAMTS7_minus	FALSE	FALSE	FALSE	FALSE
chr15	78759205	78811464	ADAMTS7	0	-	32	39	minus	71	-0.0492958	acp6_c5_rnaAligned	1.35862	0.476688	0.869653	FALSE	ADAMTS7_minus	FALSE	FALSE	FALSE	FALSE
chr15	78759205	78811464	ADAMTS7	0	-	112	111	minus	223	0.00224215	acp6_c6_rnaAligned	4.26721	1	1	FALSE	ADAMTS7_minus	FALSE	FALSE	FALSE	FALSE
chr15	78759205	78811464	ADAMTS7	0	-	55	58	minus	113	-0.0132743	acp7_c1_rnaAligned	2.16231	0.85087	1	FALSE	ADAMTS7_minus	FALSE	FALSE	FALSE	FALSE
chr15	78759205	78811464	ADAMTS7	0	-	35	46	minus	81	-0.0679012	acp7_c2_rnaAligned	1.54997	0.266412	0.658371	FALSE	ADAMTS7_minus	FALSE	FALSE	FALSE	FALSE
chr15	78759205	78811464	ADAMTS7	0	-	15	28	minus	43	-0.151163	acp7_c4_rnaAligned	0.822825	0.065994	0.332022	FALSE	ADAMTS7_minus	FALSE	FALSE	FALSE	FALSE
chr3	64515653	64688000	ADAMTS9	0	-	12	1	minus	13	0.423077	acp6_c1_rnaAligned	0.0754292	0.00341797	0.0370088	TRUE	ADAMTS9_minus	TRUE	TRUE	TRUE	FALSE
chr3	64515653	64688000	ADAMTS9	0	-	9	4	minus	13	0.192308	acp6_c5_rnaAligned	0.0754292	0.266846	0.688501	FALSE	ADAMTS9_minus	FALSE	FALSE	FALSE	FALSE
chr3	64515653	64688000	ADAMTS9	0	-	14	26	minus	40	-0.15	acp7_c1_rnaAligned	0.23209	0.0806905	0.382304	FALSE	ADAMTS9_minus	FALSE	FALSE	FALSE	FALSE
chr3	64515653	64688000	ADAMTS9	0	-	17	9	minus	26	0.153846	acp7_c2_rnaAligned	0.150858	0.168638	0.534939	FALSE	ADAMTS9_minus	FALSE	FALSE	FALSE	FALSE
chr3	64515653	64688000	ADAMTS9	0	-	38	30	minus	68	0.0588235	acp7_c4_rnaAligned	0.394553	0.396125	0.800036	FALSE	ADAMTS9_minus	FALSE	FALSE	FALSE	FALSE
chr9	17906632	18910950	ADAMTSL1	0	+	1689	2023	plus	3712	-0.0449892	acp6_c1_rnaAligned	3.69604	4.52e-08	1.54e-06	TRUE	ADAMTSL1_plus	FALSE	FALSE	FALSE	FALSE
chr9	17906632	18910950	ADAMTSL1	0	+	1667	1981	plus	3648	-0.0430373	acp6_c2_rnaAligned	3.63232	2.16e-07	7.35e-06	TRUE	ADAMTSL1_plus	FALSE	FALSE	FALSE	FALSE
chr9	17906632	18910950	ADAMTSL1	0	+	1694	2082	plus	3776	-0.0513771	acp6_c5_rnaAligned	3.75977	2.91e-10	1.78e-08	TRUE	ADAMTSL1_plus	FALSE	FALSE	FALSE	FALSE
chr9	17906632	18910950	ADAMTSL1	0	+	2134	2489	plus	4623	-0.038395	acp6_c6_rnaAligned	4.60312	1.9e-07	6.79e-06	TRUE	ADAMTSL1_plus	FALSE	FALSE	FALSE	FALSE
chr9	17906632	18910950	ADAMTSL1	0	+	2026	2220	plus	4246	-0.022845	acp7_c1_rnaAligned	4.22774	0.00305319	0.0408904	TRUE	ADAMTSL1_plus	FALSE	FALSE	FALSE	FALSE
chr9	17906632	18910950	ADAMTSL1	0	+	2753	3453	plus	6206	-0.056397	acp7_c2_rnaAligned	6.17932	6.55e-19	6.8e-17	TRUE	ADAMTSL1_plus	FALSE	FALSE	FALSE	FALSE
chr9	17906632	18910950	ADAMTSL1	0	+	2211	2505	plus	4716	-0.0311705	acp7_c4_rnaAligned	4.69572	1.97e-05	0.00052155	TRUE	ADAMTSL1_plus	FALSE	FALSE	FALSE	FALSE
chr15	83654122	84039842	ADAMTSL3	0	+	19	16	plus	35	0.0428571	acp6_c1_rnaAligned	0.0907394	0.735879	0.990799	FALSE	ADAMTSL3_plus	FALSE	FALSE	FALSE	FALSE
chr15	83654122	84039842	ADAMTSL3	0	+	40	47	plus	87	-0.0402299	acp6_c2_rnaAligned	0.225552	0.520292	0.880951	FALSE	ADAMTSL3_plus	FALSE	FALSE	FALSE	FALSE
chr15	83654122	84039842	ADAMTSL3	0	+	22	20	plus	42	0.0238095	acp6_c5_rnaAligned	0.108887	0.877614	1	FALSE	ADAMTSL3_plus	FALSE	FALSE	FALSE	FALSE
chr15	83654122	84039842	ADAMTSL3	0	+	26	16	plus	42	0.119048	acp6_c6_rnaAligned	0.108887	0.164149	0.530596	FALSE	ADAMTSL3_plus	FALSE	FALSE	FALSE	FALSE
chr15	83654122	84039842	ADAMTSL3	0	+	36	24	plus	60	0.1	acp7_c1_rnaAligned	0.155553	0.155002	0.541574	FALSE	ADAMTSL3_plus	FALSE	FALSE	FALSE	FALSE
chr15	83654122	84039842	ADAMTSL3	0	+	22	9	plus	31	0.209677	acp7_c2_rnaAligned	0.0803692	0.0294494	0.19513	FALSE	ADAMTSL3_plus	TRUE	FALSE	FALSE	FALSE
chr15	83654122	84039842	ADAMTSL3	0	+	7	10	plus	17	-0.0882353	acp7_c4_rnaAligned	0.0440734	0.629059	0.947352	FALSE	ADAMTSL3_plus	FALSE	FALSE	FALSE	FALSE
chr1	150549407	150560937	ADAMTSL4	0	+	6	7	plus	13	-0.0384615	acp6_c5_rnaAligned	1.12749	1	1	FALSE	ADAMTSL4_plus	FALSE	FALSE	FALSE	FALSE
chr1	150549407	150560937	ADAMTSL4	0	+	98	77	plus	175	0.06	acp7_c1_rnaAligned	15.1778	0.130335	0.499032	FALSE	ADAMTSL4_plus	FALSE	FALSE	FALSE	FALSE
chr1	150549407	150560937	ADAMTSL4	0	+	51	41	plus	92	0.0543478	acp7_c2_rnaAligned	7.97918	0.348141	0.741119	FALSE	ADAMTSL4_plus	FALSE	FALSE	FALSE	FALSE
chr1	150549407	150560937	ADAMTSL4	0	+	30	28	plus	58	0.0172414	acp7_c4_rnaAligned	5.03036	0.895683	1	FALSE	ADAMTSL4_plus	FALSE	FALSE	FALSE	FALSE
chr19	1505021	1513019	ADAMTSL5	0	-	4	6	minus	10	-0.1	acp6_c5_rnaAligned	1.25031	0.753906	0.997325	FALSE	ADAMTSL5_minus	FALSE	FALSE	FALSE	FALSE
chr1	154582056	154627997	ADAR	0	-	356	340	minus	696	0.0114942	acp6_c1_rnaAligned	15.1499	0.569677	0.899184	FALSE	ADAR_minus	FALSE	FALSE	FALSE	FALSE
chr1	154582056	154627997	ADAR	0	-	342	350	minus	692	-0.0057803	acp6_c2_rnaAligned	15.0628	0.790185	1	FALSE	ADAR_minus	FALSE	FALSE	FALSE	FALSE
chr1	154582056	154627997	ADAR	0	-	271	228	minus	499	0.0430862	acp6_c5_rnaAligned	10.8618	0.0599752	0.31659	FALSE	ADAR_minus	FALSE	FALSE	FALSE	FALSE
chr1	154582056	154627997	ADAR	0	-	347	360	minus	707	-0.0091938	acp6_c6_rnaAligned	15.3893	0.651799	0.946094	FALSE	ADAR_minus	FALSE	FALSE	FALSE	FALSE
chr1	154582056	154627997	ADAR	0	-	205	204	minus	409	0.00122249	acp7_c1_rnaAligned	8.90272	1	1	FALSE	ADAR_minus	FALSE	FALSE	FALSE	FALSE
chr1	154582056	154627997	ADAR	0	-	155	157	minus	312	-0.0032051	acp7_c2_rnaAligned	6.79132	0.954865	1	FALSE	ADAR_minus	FALSE	FALSE	FALSE	FALSE
chr1	154582056	154627997	ADAR	0	-	194	143	minus	337	0.0756677	acp7_c4_rnaAligned	7.3355	0.00637138	0.0676288	FALSE	ADAR_minus	FALSE	FALSE	FALSE	FALSE
chr21	45074577	45226563	ADARB1	0	+	42	23	plus	65	0.146154	acp6_c1_rnaAligned	0.427671	0.024812	0.157547	FALSE	ADARB1_plus	FALSE	FALSE	FALSE	FALSE
chr21	45074577	45226563	ADARB1	0	+	23	20	plus	43	0.0348837	acp6_c2_rnaAligned	0.282921	0.760792	1	FALSE	ADARB1_plus	FALSE	FALSE	FALSE	FALSE
chr21	45074577	45226563	ADARB1	0	+	26	25	plus	51	0.00980392	acp6_c5_rnaAligned	0.335557	1	1	FALSE	ADARB1_plus	FALSE	FALSE	FALSE	FALSE
chr21	45074577	45226563	ADARB1	0	+	41	31	plus	72	0.0694444	acp6_c6_rnaAligned	0.473728	0.288784	0.695498	FALSE	ADARB1_plus	FALSE	FALSE	FALSE	FALSE
chr21	45074577	45226563	ADARB1	0	+	111	95	plus	206	0.038835	acp7_c1_rnaAligned	1.35539	0.29596	0.724308	FALSE	ADARB1_plus	FALSE	FALSE	FALSE	FALSE
chr21	45074577	45226563	ADARB1	0	+	191	139	plus	330	0.0787879	acp7_c2_rnaAligned	2.17125	0.00491767	0.0544577	FALSE	ADARB1_plus	FALSE	FALSE	FALSE	FALSE
chr21	45074577	45226563	ADARB1	0	+	87	85	plus	172	0.00581395	acp7_c4_rnaAligned	1.13168	0.93925	1	FALSE	ADARB1_plus	FALSE	FALSE	FALSE	FALSE
chr16	75596867	75623281	ADAT1	0	-	6	7	minus	13	-0.0384615	acp6_c1_rnaAligned	0.492163	1	1	FALSE	ADAT1_minus	FALSE	FALSE	FALSE	FALSE
chr16	75596867	75623281	ADAT1	0	-	9	9	minus	18	0	acp6_c2_rnaAligned	0.681457	1	1	FALSE	ADAT1_minus	FALSE	FALSE	FALSE	FALSE
chr16	75596867	75623281	ADAT1	0	-	12	6	minus	18	0.166667	acp6_c5_rnaAligned	0.681457	0.237885	0.656427	FALSE	ADAT1_minus	FALSE	FALSE	FALSE	FALSE
chr16	75596867	75623281	ADAT1	0	-	6	11	minus	17	-0.147059	acp6_c6_rnaAligned	0.643598	0.332306	0.737842	FALSE	ADAT1_minus	FALSE	FALSE	FALSE	FALSE
chr16	75596867	75623281	ADAT1	0	-	20	35	minus	55	-0.136364	acp7_c1_rnaAligned	2.08223	0.0580642	0.317001	FALSE	ADAT1_minus	FALSE	FALSE	FALSE	FALSE
chr16	75596867	75623281	ADAT1	0	-	12	12	minus	24	0	acp7_c2_rnaAligned	0.908609	1	1	FALSE	ADAT1_minus	FALSE	FALSE	FALSE	FALSE
chr16	75596867	75623281	ADAT1	0	-	10	16	minus	26	-0.115385	acp7_c4_rnaAligned	0.984326	0.32694	0.739212	FALSE	ADAT1_minus	FALSE	FALSE	FALSE	FALSE
chr6	143422831	143450695	ADAT2	0	-	47	43	minus	90	0.0222222	acp6_c1_rnaAligned	3.22997	0.752033	0.995597	FALSE	ADAT2_minus	FALSE	FALSE	FALSE	FALSE
chr6	143422831	143450695	ADAT2	0	-	31	52	minus	83	-0.126506	acp6_c2_rnaAligned	2.97875	0.0275342	0.169555	FALSE	ADAT2_minus	FALSE	FALSE	FALSE	FALSE
chr6	143422831	143450695	ADAT2	0	-	39	28	minus	67	0.0820895	acp6_c5_rnaAligned	2.40454	0.221549	0.643108	FALSE	ADAT2_minus	FALSE	FALSE	FALSE	FALSE
chr6	143422831	143450695	ADAT2	0	-	34	72	minus	106	-0.179245	acp6_c6_rnaAligned	3.80419	0.00028453	0.0053185	TRUE	ADAT2_minus	FALSE	FALSE	FALSE	FALSE
chr6	143422831	143450695	ADAT2	0	-	6	7	minus	13	-0.0384615	acp7_c1_rnaAligned	0.466552	1	1	FALSE	ADAT2_minus	FALSE	FALSE	FALSE	FALSE
chr19	1905398	1913447	ADAT3	0	+	5	10	plus	15	-0.166667	acp7_c1_rnaAligned	1.86359	0.301758	0.727276	FALSE	ADAT3_plus	FALSE	FALSE	FALSE	FALSE
chr19	1905398	1913447	ADAT3	0	+	11	5	plus	16	0.1875	acp7_c2_rnaAligned	1.98782	0.210114	0.591401	FALSE	ADAT3_plus	FALSE	FALSE	FALSE	FALSE
chr19	1905398	1913447	ADAT3	0	+	10	9	plus	19	0.0263158	acp7_c4_rnaAligned	2.36054	1	1	FALSE	ADAT3_plus	FALSE	FALSE	FALSE	FALSE
chr14	77800108	77935014	ADCK1	0	+	10	16	plus	26	-0.115385	acp6_c1_rnaAligned	0.192727	0.32694	0.719231	FALSE	ADCK1_plus	FALSE	FALSE	FALSE	FALSE
chr14	77800108	77935014	ADCK1	0	+	21	17	plus	38	0.0526316	acp6_c2_rnaAligned	0.281678	0.627103	0.937596	FALSE	ADCK1_plus	FALSE	FALSE	FALSE	FALSE
chr14	77800108	77935014	ADCK1	0	+	11	15	plus	26	-0.0769231	acp6_c5_rnaAligned	0.192727	0.557197	0.91961	FALSE	ADCK1_plus	FALSE	FALSE	FALSE	FALSE
chr14	77800108	77935014	ADCK1	0	+	17	24	plus	41	-0.0853659	acp6_c6_rnaAligned	0.303915	0.348889	0.74992	FALSE	ADCK1_plus	FALSE	FALSE	FALSE	FALSE
chr14	77800108	77935014	ADCK1	0	+	54	58	plus	112	-0.0178571	acp7_c1_rnaAligned	0.830208	0.776965	1	FALSE	ADCK1_plus	FALSE	FALSE	FALSE	FALSE
chr14	77800108	77935014	ADCK1	0	+	26	39	plus	65	-0.1	acp7_c2_rnaAligned	0.481817	0.136032	0.481544	FALSE	ADCK1_plus	FALSE	FALSE	FALSE	FALSE
chr14	77800108	77935014	ADCK1	0	+	29	32	plus	61	-0.0245902	acp7_c4_rnaAligned	0.452167	0.798153	1	FALSE	ADCK1_plus	FALSE	FALSE	FALSE	FALSE
chr7	140672944	140695110	ADCK2	0	+	31	19	plus	50	0.12	acp6_c1_rnaAligned	2.25571	0.11892	0.422951	FALSE	ADCK2_plus	FALSE	FALSE	FALSE	FALSE
chr7	140672944	140695110	ADCK2	0	+	19	16	plus	35	0.0428571	acp6_c2_rnaAligned	1.57899	0.735879	0.997321	FALSE	ADCK2_plus	FALSE	FALSE	FALSE	FALSE
chr7	140672944	140695110	ADCK2	0	+	29	22	plus	51	0.0686275	acp6_c5_rnaAligned	2.30082	0.401062	0.815828	FALSE	ADCK2_plus	FALSE	FALSE	FALSE	FALSE
chr7	140672944	140695110	ADCK2	0	+	34	21	plus	55	0.118182	acp6_c6_rnaAligned	2.48128	0.104789	0.41744	FALSE	ADCK2_plus	FALSE	FALSE	FALSE	FALSE
chr7	140672944	140695110	ADCK2	0	+	8	17	plus	25	-0.18	acp7_c1_rnaAligned	1.12785	0.107752	0.450376	FALSE	ADCK2_plus	FALSE	FALSE	FALSE	FALSE
chr7	140672944	140695110	ADCK2	0	+	11	7	plus	18	0.111111	acp7_c2_rnaAligned	0.812055	0.480682	0.860688	FALSE	ADCK2_plus	FALSE	FALSE	FALSE	FALSE
chr7	140672944	140695110	ADCK2	0	+	12	9	plus	21	0.0714286	acp7_c4_rnaAligned	0.947397	0.663624	0.970288	FALSE	ADCK2_plus	FALSE	FALSE	FALSE	FALSE
chr8	144373087	144393242	ADCK5	0	+	64	46	plus	110	0.0818182	acp6_c1_rnaAligned	5.4577	0.104613	0.399818	FALSE	ADCK5_plus	FALSE	FALSE	FALSE	FALSE
chr8	144373087	144393242	ADCK5	0	+	34	42	plus	76	-0.0526316	acp6_c2_rnaAligned	3.77078	0.422191	0.804381	FALSE	ADCK5_plus	FALSE	FALSE	FALSE	FALSE
chr8	144373087	144393242	ADCK5	0	+	76	39	plus	115	0.16087	acp6_c5_rnaAligned	5.70578	0.00071719	0.0126664	TRUE	ADCK5_plus	FALSE	FALSE	FALSE	FALSE
chr8	144373087	144393242	ADCK5	0	+	76	50	plus	126	0.103175	acp6_c6_rnaAligned	6.25155	0.0255434	0.172124	FALSE	ADCK5_plus	FALSE	FALSE	FALSE	FALSE
chr8	144373087	144393242	ADCK5	0	+	73	25	plus	98	0.244898	acp7_c1_rnaAligned	4.86232	1.28e-06	4.86e-05	TRUE	ADCK5_plus	TRUE	FALSE	FALSE	FALSE
chr8	144373087	144393242	ADCK5	0	+	58	18	plus	76	0.263158	acp7_c2_rnaAligned	3.77078	4.71e-06	0.00014343	TRUE	ADCK5_plus	TRUE	FALSE	FALSE	FALSE
chr8	144373087	144393242	ADCK5	0	+	27	34	plus	61	-0.057377	acp7_c4_rnaAligned	3.02654	0.442626	0.83881	FALSE	ADCK5_plus	FALSE	FALSE	FALSE	FALSE
chr7	45574139	45723116	ADCY1	0	+	6	4	plus	10	0.1	acp6_c2_rnaAligned	0.0671245	0.753906	1	FALSE	ADCY1_plus	FALSE	FALSE	FALSE	FALSE
chr5	7396137	7830081	ADCY2	0	+	8	5	plus	13	0.115385	acp6_c2_rnaAligned	0.0299578	0.581055	0.911242	FALSE	ADCY2_plus	FALSE	FALSE	FALSE	FALSE
chr5	7396137	7830081	ADCY2	0	+	7	4	plus	11	0.136364	acp6_c5_rnaAligned	0.0253489	0.548828	0.916432	FALSE	ADCY2_plus	FALSE	FALSE	FALSE	FALSE
chr5	7396137	7830081	ADCY2	0	+	10	3	plus	13	0.269231	acp6_c6_rnaAligned	0.0299578	0.0922852	0.388416	FALSE	ADCY2_plus	TRUE	FALSE	FALSE	FALSE
chr5	7396137	7830081	ADCY2	0	+	15	12	plus	27	0.0555556	acp7_c1_rnaAligned	0.06222	0.701108	1	FALSE	ADCY2_plus	FALSE	FALSE	FALSE	FALSE
chr5	7396137	7830081	ADCY2	0	+	8	5	plus	13	0.115385	acp7_c2_rnaAligned	0.0299578	0.581055	0.911709	FALSE	ADCY2_plus	FALSE	FALSE	FALSE	FALSE
chr2	24819168	24920237	ADCY3	0	-	114	109	minus	223	0.0112108	acp6_c1_rnaAligned	2.20641	0.788879	1	FALSE	ADCY3_minus	FALSE	FALSE	FALSE	FALSE
chr2	24819168	24920237	ADCY3	0	-	117	124	minus	241	-0.0145228	acp6_c2_rnaAligned	2.38451	0.699216	0.9774	FALSE	ADCY3_minus	FALSE	FALSE	FALSE	FALSE
chr2	24819168	24920237	ADCY3	0	-	99	63	minus	162	0.111111	acp6_c5_rnaAligned	1.60287	0.0057926	0.0666405	FALSE	ADCY3_minus	FALSE	FALSE	FALSE	FALSE
chr2	24819168	24920237	ADCY3	0	-	96	109	minus	205	-0.0317073	acp6_c6_rnaAligned	2.02832	0.402024	0.797326	FALSE	ADCY3_minus	FALSE	FALSE	FALSE	FALSE
chr2	24819168	24920237	ADCY3	0	-	72	81	minus	153	-0.0294118	acp7_c1_rnaAligned	1.51382	0.517921	0.899598	FALSE	ADCY3_minus	FALSE	FALSE	FALSE	FALSE
chr2	24819168	24920237	ADCY3	0	-	76	68	minus	144	0.0277778	acp7_c2_rnaAligned	1.42477	0.559821	0.902413	FALSE	ADCY3_minus	FALSE	FALSE	FALSE	FALSE
chr2	24819168	24920237	ADCY3	0	-	59	54	minus	113	0.0221239	acp7_c4_rnaAligned	1.11805	0.706882	0.996181	FALSE	ADCY3_minus	FALSE	FALSE	FALSE	FALSE
chr14	24318358	24335071	ADCY4	0	-	2	13	minus	15	-0.366667	acp7_c1_rnaAligned	0.897505	0.00738525	0.0791519	FALSE	ADCY4_minus	TRUE	TRUE	FALSE	FALSE
chr14	24318358	24335071	ADCY4	0	-	1	10	minus	11	-0.409091	acp7_c2_rnaAligned	0.65817	0.0117188	0.102666	FALSE	ADCY4_minus	TRUE	TRUE	TRUE	FALSE
chr12	48766193	48789974	ADCY6	0	-	61	38	minus	99	0.116162	acp7_c1_rnaAligned	4.16299	0.0265251	0.192534	FALSE	ADCY6_minus	FALSE	FALSE	FALSE	FALSE
chr12	48766193	48789974	ADCY6	0	-	17	31	minus	48	-0.145833	acp7_c2_rnaAligned	2.01842	0.0594634	0.306401	FALSE	ADCY6_minus	FALSE	FALSE	FALSE	FALSE
chr12	48766193	48789974	ADCY6	0	-	34	21	minus	55	0.118182	acp7_c4_rnaAligned	2.31277	0.104789	0.434331	FALSE	ADCY6_minus	FALSE	FALSE	FALSE	FALSE
chr16	50244698	50318135	ADCY7	0	+	118	145	plus	263	-0.0513308	acp6_c1_rnaAligned	3.5813	0.108708	0.405376	FALSE	ADCY7_plus	FALSE	FALSE	FALSE	FALSE
chr16	50244698	50318135	ADCY7	0	+	174	183	plus	357	-0.012605	acp6_c2_rnaAligned	4.86131	0.672059	0.959667	FALSE	ADCY7_plus	FALSE	FALSE	FALSE	FALSE
chr16	50244698	50318135	ADCY7	0	+	85	159	plus	244	-0.151639	acp6_c5_rnaAligned	3.32258	2.5e-06	9.11e-05	TRUE	ADCY7_plus	FALSE	FALSE	FALSE	FALSE
chr16	50244698	50318135	ADCY7	0	+	97	90	plus	187	0.0187166	acp6_c6_rnaAligned	2.5464	0.660948	0.952347	FALSE	ADCY7_plus	FALSE	FALSE	FALSE	FALSE
chr16	50244698	50318135	ADCY7	0	+	70	71	plus	141	-0.0035461	acp7_c1_rnaAligned	1.92001	1	1	FALSE	ADCY7_plus	FALSE	FALSE	FALSE	FALSE
chr16	50244698	50318135	ADCY7	0	+	51	50	plus	101	0.0049505	acp7_c2_rnaAligned	1.37533	1	1	FALSE	ADCY7_plus	FALSE	FALSE	FALSE	FALSE
chr16	50244698	50318135	ADCY7	0	+	49	49	plus	98	0	acp7_c4_rnaAligned	1.33448	1	1	FALSE	ADCY7_plus	FALSE	FALSE	FALSE	FALSE
chr16	3953386	4116442	ADCY9	0	-	91	100	minus	191	-0.0235602	acp6_c1_rnaAligned	1.17138	0.562798	0.893481	FALSE	ADCY9_minus	FALSE	FALSE	FALSE	FALSE
chr16	3953386	4116442	ADCY9	0	-	130	81	minus	211	0.116114	acp6_c2_rnaAligned	1.29403	0.00090779	0.0129296	TRUE	ADCY9_minus	FALSE	FALSE	FALSE	FALSE
chr16	3953386	4116442	ADCY9	0	-	90	83	minus	173	0.0202312	acp6_c5_rnaAligned	1.06099	0.648393	0.956557	FALSE	ADCY9_minus	FALSE	FALSE	FALSE	FALSE
chr16	3953386	4116442	ADCY9	0	-	130	94	minus	224	0.0803571	acp6_c6_rnaAligned	1.37376	0.0191573	0.145748	FALSE	ADCY9_minus	FALSE	FALSE	FALSE	FALSE
chr16	3953386	4116442	ADCY9	0	-	27	19	minus	46	0.0869565	acp7_c1_rnaAligned	0.282112	0.301996	0.727276	FALSE	ADCY9_minus	FALSE	FALSE	FALSE	FALSE
chr16	3953386	4116442	ADCY9	0	-	32	21	minus	53	0.103774	acp7_c2_rnaAligned	0.325042	0.168978	0.534953	FALSE	ADCY9_minus	FALSE	FALSE	FALSE	FALSE
chr16	3953386	4116442	ADCY9	0	-	7	18	minus	25	-0.22	acp7_c4_rnaAligned	0.153322	0.0432852	0.256509	FALSE	ADCY9_minus	TRUE	FALSE	FALSE	FALSE
chr4	2843843	2930062	ADD1	0	+	701	628	plus	1329	0.0274643	acp6_c1_rnaAligned	15.4142	0.0482259	0.248338	FALSE	ADD1_plus	FALSE	FALSE	FALSE	FALSE
chr4	2843843	2930062	ADD1	0	+	697	672	plus	1369	0.00913075	acp6_c2_rnaAligned	15.8782	0.51658	0.879536	FALSE	ADD1_plus	FALSE	FALSE	FALSE	FALSE
chr4	2843843	2930062	ADD1	0	+	601	602	plus	1203	-0.0004156	acp6_c5_rnaAligned	13.9528	1	1	FALSE	ADD1_plus	FALSE	FALSE	FALSE	FALSE
chr4	2843843	2930062	ADD1	0	+	692	678	plus	1370	0.00510949	acp6_c6_rnaAligned	15.8898	0.725435	0.987242	FALSE	ADD1_plus	FALSE	FALSE	FALSE	FALSE
chr4	2843843	2930062	ADD1	0	+	14	23	plus	37	-0.121622	acp7_c1_rnaAligned	0.42914	0.187742	0.587713	FALSE	ADD1_plus	FALSE	FALSE	FALSE	FALSE
chr4	2843843	2930062	ADD1	0	+	21	26	plus	47	-0.0531915	acp7_c2_rnaAligned	0.545123	0.560065	0.902413	FALSE	ADD1_plus	FALSE	FALSE	FALSE	FALSE
chr4	2843843	2930062	ADD1	0	+	10	16	plus	26	-0.115385	acp7_c4_rnaAligned	0.301558	0.32694	0.739212	FALSE	ADD1_plus	FALSE	FALSE	FALSE	FALSE
chr2	70656783	70768200	ADD2	0	-	3	40	minus	43	-0.430233	acp7_c1_rnaAligned	0.385938	3.02e-09	1.66e-07	TRUE	ADD2_minus	TRUE	TRUE	TRUE	FALSE
chr2	70656783	70768200	ADD2	0	-	12	2	minus	14	0.357143	acp7_c2_rnaAligned	0.125654	0.0129394	0.110026	FALSE	ADD2_minus	TRUE	TRUE	FALSE	FALSE
chr2	70656783	70768200	ADD2	0	-	6	12	minus	18	-0.166667	acp7_c4_rnaAligned	0.161555	0.237885	0.64156	FALSE	ADD2_minus	FALSE	FALSE	FALSE	FALSE
chr10	109996372	110135565	ADD3	0	+	7	10	plus	17	-0.0882353	acp6_c1_rnaAligned	0.122133	0.629059	0.93011	FALSE	ADD3_plus	FALSE	FALSE	FALSE	FALSE
chr10	109996372	110135565	ADD3	0	+	14	18	plus	32	-0.0625	acp6_c2_rnaAligned	0.229897	0.596615	0.918947	FALSE	ADD3_plus	FALSE	FALSE	FALSE	FALSE
chr10	109996372	110135565	ADD3	0	+	4	10	plus	14	-0.214286	acp6_c5_rnaAligned	0.10058	0.179565	0.576606	FALSE	ADD3_plus	TRUE	FALSE	FALSE	FALSE
chr10	109996372	110135565	ADD3	0	+	7	11	plus	18	-0.111111	acp6_c6_rnaAligned	0.129317	0.480682	0.850598	FALSE	ADD3_plus	FALSE	FALSE	FALSE	FALSE
chr10	109996372	110135565	ADD3	0	+	9	10	plus	19	-0.0263158	acp7_c1_rnaAligned	0.136501	1	1	FALSE	ADD3_plus	FALSE	FALSE	FALSE	FALSE
chr10	109996372	110135565	ADD3	0	+	10	8	plus	18	0.0555556	acp7_c2_rnaAligned	0.129317	0.814529	1	FALSE	ADD3_plus	FALSE	FALSE	FALSE	FALSE
chr10	109996372	110135565	ADD3	0	+	2	6	plus	8	-0.25	acp7_c4_rnaAligned	0.0574742	0.289062	0.697154	FALSE	ADD3_plus	TRUE	FALSE	FALSE	FALSE
chr8	37796882	37844896	ADGRA2	0	+	167	150	plus	317	0.0268139	acp6_c1_rnaAligned	6.60224	0.368864	0.756825	FALSE	ADGRA2_plus	FALSE	FALSE	FALSE	FALSE
chr8	37796882	37844896	ADGRA2	0	+	154	148	plus	302	0.00993377	acp6_c2_rnaAligned	6.28983	0.773619	1	FALSE	ADGRA2_plus	FALSE	FALSE	FALSE	FALSE
chr8	37796882	37844896	ADGRA2	0	+	193	134	plus	327	0.0902141	acp6_c5_rnaAligned	6.81051	0.00130406	0.0202481	TRUE	ADGRA2_plus	FALSE	FALSE	FALSE	FALSE
chr8	37796882	37844896	ADGRA2	0	+	195	149	plus	344	0.0668605	acp6_c6_rnaAligned	7.16458	0.0151353	0.125173	FALSE	ADGRA2_plus	FALSE	FALSE	FALSE	FALSE
chr8	37796882	37844896	ADGRA2	0	+	37	38	plus	75	-0.0066667	acp7_c1_rnaAligned	1.56204	1	1	FALSE	ADGRA2_plus	FALSE	FALSE	FALSE	FALSE
chr8	37796882	37844896	ADGRA2	0	+	38	58	plus	96	-0.104167	acp7_c2_rnaAligned	1.99942	0.0519105	0.281457	FALSE	ADGRA2_plus	FALSE	FALSE	FALSE	FALSE
chr8	37796882	37844896	ADGRA2	0	+	32	49	plus	81	-0.104938	acp7_c4_rnaAligned	1.68701	0.0747881	0.357194	FALSE	ADGRA2_plus	FALSE	FALSE	FALSE	FALSE
chr4	22387375	22516066	ADGRA3	0	-	227	241	minus	468	-0.0149573	acp6_c1_rnaAligned	3.63662	0.547936	0.885544	FALSE	ADGRA3_minus	FALSE	FALSE	FALSE	FALSE
chr4	22387375	22516066	ADGRA3	0	-	240	261	minus	501	-0.0209581	acp6_c2_rnaAligned	3.89305	0.371587	0.761782	FALSE	ADGRA3_minus	FALSE	FALSE	FALSE	FALSE
chr4	22387375	22516066	ADGRA3	0	-	275	217	minus	492	0.0589431	acp6_c5_rnaAligned	3.82311	0.0101052	0.0989398	FALSE	ADGRA3_minus	FALSE	FALSE	FALSE	FALSE
chr4	22387375	22516066	ADGRA3	0	-	375	406	minus	781	-0.0198464	acp6_c6_rnaAligned	6.0688	0.283046	0.689221	FALSE	ADGRA3_minus	FALSE	FALSE	FALSE	FALSE
chr4	22387375	22516066	ADGRA3	0	-	91	64	minus	155	0.0870968	acp7_c1_rnaAligned	1.20444	0.0364227	0.235115	FALSE	ADGRA3_minus	FALSE	FALSE	FALSE	FALSE
chr4	22387375	22516066	ADGRA3	0	-	64	56	minus	120	0.0333333	acp7_c2_rnaAligned	0.932466	0.522991	0.881887	FALSE	ADGRA3_minus	FALSE	FALSE	FALSE	FALSE
chr4	22387375	22516066	ADGRA3	0	-	66	64	minus	130	0.00769231	acp7_c4_rnaAligned	1.01017	0.930155	1	FALSE	ADGRA3_minus	FALSE	FALSE	FALSE	FALSE
chr1	31727116	31764340	ADGRB2	0	-	9	15	minus	24	-0.125	acp6_c1_rnaAligned	0.644745	0.307456	0.694995	FALSE	ADGRB2_minus	FALSE	FALSE	FALSE	FALSE
chr1	31727116	31764340	ADGRB2	0	-	6	9	minus	15	-0.1	acp6_c2_rnaAligned	0.402966	0.607239	0.923172	FALSE	ADGRB2_minus	FALSE	FALSE	FALSE	FALSE
chr1	31727116	31764340	ADGRB2	0	-	7	11	minus	18	-0.111111	acp6_c5_rnaAligned	0.483559	0.480682	0.869653	FALSE	ADGRB2_minus	FALSE	FALSE	FALSE	FALSE
chr1	31727116	31764340	ADGRB2	0	-	15	10	minus	25	0.1	acp6_c6_rnaAligned	0.67161	0.424356	0.813464	FALSE	ADGRB2_minus	FALSE	FALSE	FALSE	FALSE
chr6	68635281	69389506	ADGRB3	0	+	45	26	plus	71	0.133803	acp7_c1_rnaAligned	0.0941364	0.0319272	0.216972	FALSE	ADGRB3_plus	FALSE	FALSE	FALSE	FALSE
chr6	68635281	69389506	ADGRB3	0	+	34	15	plus	49	0.193878	acp7_c2_rnaAligned	0.0649673	0.00939924	0.0874881	FALSE	ADGRB3_plus	FALSE	FALSE	FALSE	FALSE
chr6	68635281	69389506	ADGRB3	0	+	23	17	plus	40	0.075	acp7_c4_rnaAligned	0.0530346	0.429591	0.825578	FALSE	ADGRB3_plus	FALSE	FALSE	FALSE	FALSE
chr19	14381443	14408723	ADGRE5	0	+	9	2	plus	11	0.318182	acp6_c1_rnaAligned	0.403226	0.0654297	0.299591	FALSE	ADGRE5_plus	TRUE	TRUE	FALSE	FALSE
chr19	14381443	14408723	ADGRE5	0	+	4	9	plus	13	-0.192308	acp6_c2_rnaAligned	0.47654	0.266846	0.646637	FALSE	ADGRE5_plus	FALSE	FALSE	FALSE	FALSE
chr19	14381443	14408723	ADGRE5	0	+	15	21	plus	36	-0.0833333	acp7_c1_rnaAligned	1.31965	0.405032	0.818223	FALSE	ADGRE5_plus	FALSE	FALSE	FALSE	FALSE
chr19	14381443	14408723	ADGRE5	0	+	26	45	plus	71	-0.133803	acp7_c2_rnaAligned	2.60264	0.0319272	0.205937	FALSE	ADGRE5_plus	FALSE	FALSE	FALSE	FALSE
chr19	14381443	14408723	ADGRE5	0	+	13	30	plus	43	-0.197674	acp7_c4_rnaAligned	1.57625	0.0137182	0.115961	FALSE	ADGRE5_plus	FALSE	FALSE	FALSE	FALSE
chr6	142302006	142446261	ADGRG6	0	+	4	8	plus	12	-0.166667	acp6_c1_rnaAligned	0.083186	0.387695	0.767418	FALSE	ADGRG6_plus	FALSE	FALSE	FALSE	FALSE
chr6	142302006	142446261	ADGRG6	0	+	8	9	plus	17	-0.0294118	acp6_c6_rnaAligned	0.117847	1	1	FALSE	ADGRG6_plus	FALSE	FALSE	FALSE	FALSE
chr6	142302006	142446261	ADGRG6	0	+	2	7	plus	9	-0.277778	acp7_c2_rnaAligned	0.0623895	0.179688	0.542345	FALSE	ADGRG6_plus	TRUE	FALSE	FALSE	FALSE
chr6	142302006	142446261	ADGRG6	0	+	13	8	plus	21	0.119048	acp7_c4_rnaAligned	0.145576	0.38331	0.792301	FALSE	ADGRG6_plus	FALSE	FALSE	FALSE	FALSE
chr19	14147742	14206169	ADGRL1	0	-	4	7	minus	11	-0.136364	acp6_c1_rnaAligned	0.188269	0.548828	0.885544	FALSE	ADGRL1_minus	FALSE	FALSE	FALSE	FALSE
chr19	14147742	14206169	ADGRL1	0	-	8	3	minus	11	0.227273	acp6_c6_rnaAligned	0.188269	0.226562	0.625621	FALSE	ADGRL1_minus	TRUE	FALSE	FALSE	FALSE
chr1	81306131	81993932	ADGRL2	0	+	6	6	plus	12	0	acp6_c5_rnaAligned	0.0174469	1	1	FALSE	ADGRL2_plus	FALSE	FALSE	FALSE	FALSE
chr1	81306131	81993932	ADGRL2	0	+	8	9	plus	17	-0.0294118	acp6_c6_rnaAligned	0.0247165	1	1	FALSE	ADGRL2_plus	FALSE	FALSE	FALSE	FALSE
chr1	81306131	81993932	ADGRL2	0	+	27	38	plus	65	-0.0846154	acp7_c1_rnaAligned	0.0945041	0.214539	0.629395	FALSE	ADGRL2_plus	FALSE	FALSE	FALSE	FALSE
chr1	81306131	81993932	ADGRL2	0	+	15	13	plus	28	0.0357143	acp7_c2_rnaAligned	0.0407095	0.850554	1	FALSE	ADGRL2_plus	FALSE	FALSE	FALSE	FALSE
chr1	81306131	81993932	ADGRL2	0	+	30	41	plus	71	-0.0774648	acp7_c4_rnaAligned	0.103228	0.235098	0.640209	FALSE	ADGRL2_plus	FALSE	FALSE	FALSE	FALSE
chr1	78889763	79006730	ADGRL4	0	-	118	99	minus	217	0.0437788	acp6_c1_rnaAligned	1.85522	0.221651	0.597064	FALSE	ADGRL4_minus	FALSE	FALSE	FALSE	FALSE
chr1	78889763	79006730	ADGRL4	0	-	44	97	minus	141	-0.187943	acp6_c2_rnaAligned	1.20547	9.48e-06	0.00022581	TRUE	ADGRL4_minus	FALSE	FALSE	FALSE	FALSE
chr1	78889763	79006730	ADGRL4	0	-	13	59	minus	72	-0.319444	acp6_c5_rnaAligned	0.615558	3.81e-08	1.85e-06	TRUE	ADGRL4_minus	TRUE	TRUE	FALSE	FALSE
chr1	78889763	79006730	ADGRL4	0	-	72	55	minus	127	0.0669291	acp6_c6_rnaAligned	1.08578	0.1554	0.511928	FALSE	ADGRL4_minus	FALSE	FALSE	FALSE	FALSE
chr1	78889763	79006730	ADGRL4	0	-	81	46	minus	127	0.137795	acp7_c1_rnaAligned	1.08578	0.00241755	0.0344011	TRUE	ADGRL4_minus	FALSE	FALSE	FALSE	FALSE
chr1	78889763	79006730	ADGRL4	0	-	83	51	minus	134	0.119403	acp7_c2_rnaAligned	1.14562	0.00717812	0.0733401	FALSE	ADGRL4_minus	FALSE	FALSE	FALSE	FALSE
chr1	78889763	79006730	ADGRL4	0	-	1	10	minus	11	-0.409091	acp7_c4_rnaAligned	0.0940436	0.0117188	0.104637	FALSE	ADGRL4_minus	TRUE	TRUE	TRUE	FALSE
chr5	90558796	91164437	ADGRV1	0	+	7	4	plus	11	0.136364	acp7_c1_rnaAligned	0.0181626	0.548828	0.912979	FALSE	ADGRV1_plus	FALSE	FALSE	FALSE	FALSE
chr5	90558796	91164437	ADGRV1	0	+	14	2	plus	16	0.375	acp7_c2_rnaAligned	0.0264183	0.00418091	0.048231	TRUE	ADGRV1_plus	TRUE	TRUE	FALSE	FALSE
chr5	90558796	91164437	ADGRV1	0	+	8	1	plus	9	0.388889	acp7_c4_rnaAligned	0.0148603	0.0390625	0.240098	FALSE	ADGRV1_plus	TRUE	TRUE	FALSE	FALSE
chr4	99070977	99088788	ADH5	0	-	1132	1560	minus	2692	-0.0794948	acp6_c1_rnaAligned	151.143	1.62e-16	1.12e-14	TRUE	ADH5_minus	FALSE	FALSE	FALSE	FALSE
chr4	99070977	99088788	ADH5	0	-	1598	2172	minus	3770	-0.0761273	acp6_c2_rnaAligned	211.667	8.76e-21	8.11e-19	TRUE	ADH5_minus	FALSE	FALSE	FALSE	FALSE
chr4	99070977	99088788	ADH5	0	-	1002	1420	minus	2422	-0.0862923	acp6_c5_rnaAligned	135.983	1.99e-17	1.9e-15	TRUE	ADH5_minus	FALSE	FALSE	FALSE	FALSE
chr4	99070977	99088788	ADH5	0	-	1330	1960	minus	3290	-0.0957447	acp6_c6_rnaAligned	184.717	3.83e-28	5.28e-26	TRUE	ADH5_minus	FALSE	FALSE	FALSE	FALSE
chr4	99070977	99088788	ADH5	0	-	15	22	minus	37	-0.0945946	acp7_c1_rnaAligned	2.07737	0.324009	0.754408	FALSE	ADH5_minus	FALSE	FALSE	FALSE	FALSE
chr4	99070977	99088788	ADH5	0	-	14	32	minus	46	-0.195652	acp7_c2_rnaAligned	2.58267	0.0113516	0.101141	FALSE	ADH5_minus	FALSE	FALSE	FALSE	FALSE
chr4	99070977	99088788	ADH5	0	-	9	25	minus	34	-0.235294	acp7_c4_rnaAligned	1.90893	0.00904119	0.0863706	FALSE	ADH5_minus	TRUE	FALSE	FALSE	FALSE
chr8	66432503	66468907	ADHFE1	0	+	23	15	plus	38	0.105263	acp6_c1_rnaAligned	1.04384	0.255875	0.635589	FALSE	ADHFE1_plus	FALSE	FALSE	FALSE	FALSE
chr8	66432503	66468907	ADHFE1	0	+	39	29	plus	68	0.0735294	acp6_c2_rnaAligned	1.86793	0.27499	0.658316	FALSE	ADHFE1_plus	FALSE	FALSE	FALSE	FALSE
chr8	66432503	66468907	ADHFE1	0	+	21	12	plus	33	0.136364	acp6_c5_rnaAligned	0.906494	0.162756	0.548573	FALSE	ADHFE1_plus	FALSE	FALSE	FALSE	FALSE
chr8	66432503	66468907	ADHFE1	0	+	40	30	plus	70	0.0714286	acp6_c6_rnaAligned	1.92287	0.281979	0.68723	FALSE	ADHFE1_plus	FALSE	FALSE	FALSE	FALSE
chr8	66432503	66468907	ADHFE1	0	+	42	40	plus	82	0.0121951	acp7_c1_rnaAligned	2.2525	0.912157	1	FALSE	ADHFE1_plus	FALSE	FALSE	FALSE	FALSE
chr8	66432503	66468907	ADHFE1	0	+	79	60	plus	139	0.0683453	acp7_c2_rnaAligned	3.81826	0.126523	0.464032	FALSE	ADHFE1_plus	FALSE	FALSE	FALSE	FALSE
chr8	66432503	66468907	ADHFE1	0	+	41	38	plus	79	0.0189873	acp7_c4_rnaAligned	2.17009	0.822144	1	FALSE	ADHFE1_plus	FALSE	FALSE	FALSE	FALSE
chr2	3497365	3519531	ADI1	0	-	38	25	minus	63	0.103175	acp7_c1_rnaAligned	2.84219	0.129918	0.498374	FALSE	ADI1_minus	FALSE	FALSE	FALSE	FALSE
chr2	3497365	3519531	ADI1	0	-	20	34	minus	54	-0.12963	acp7_c2_rnaAligned	2.43616	0.0759047	0.349119	FALSE	ADI1_minus	FALSE	FALSE	FALSE	FALSE
chr2	3497365	3519531	ADI1	0	-	31	22	minus	53	0.0849057	acp7_c4_rnaAligned	2.39105	0.271679	0.682425	FALSE	ADI1_minus	FALSE	FALSE	FALSE	FALSE
chr1	202940824	202958572	ADIPOR1	0	-	34	31	minus	65	0.0230769	acp7_c1_rnaAligned	3.66238	0.804317	1	FALSE	ADIPOR1_minus	FALSE	FALSE	FALSE	FALSE
chr1	202940824	202958572	ADIPOR1	0	-	26	38	minus	64	-0.09375	acp7_c2_rnaAligned	3.60604	0.168643	0.534939	FALSE	ADIPOR1_minus	FALSE	FALSE	FALSE	FALSE
chr1	202940824	202958572	ADIPOR1	0	-	23	26	minus	49	-0.0306122	acp7_c4_rnaAligned	2.76087	0.77545	1	FALSE	ADIPOR1_minus	FALSE	FALSE	FALSE	FALSE
chr12	1691069	1788674	ADIPOR2	0	+	277	247	plus	524	0.028626	acp6_c1_rnaAligned	5.36858	0.205158	0.570908	FALSE	ADIPOR2_plus	FALSE	FALSE	FALSE	FALSE
chr12	1691069	1788674	ADIPOR2	0	+	271	290	plus	561	-0.016934	acp6_c2_rnaAligned	5.74766	0.447307	0.826539	FALSE	ADIPOR2_plus	FALSE	FALSE	FALSE	FALSE
chr12	1691069	1788674	ADIPOR2	0	+	203	187	plus	390	0.0205128	acp6_c5_rnaAligned	3.9957	0.447562	0.849619	FALSE	ADIPOR2_plus	FALSE	FALSE	FALSE	FALSE
chr12	1691069	1788674	ADIPOR2	0	+	256	226	plus	482	0.0311203	acp6_c6_rnaAligned	4.93827	0.186474	0.569423	FALSE	ADIPOR2_plus	FALSE	FALSE	FALSE	FALSE
chr12	1691069	1788674	ADIPOR2	0	+	311	331	plus	642	-0.0155763	acp7_c1_rnaAligned	6.57753	0.453359	0.860381	FALSE	ADIPOR2_plus	FALSE	FALSE	FALSE	FALSE
chr12	1691069	1788674	ADIPOR2	0	+	216	222	plus	438	-0.0068493	acp7_c2_rnaAligned	4.48748	0.811209	1	FALSE	ADIPOR2_plus	FALSE	FALSE	FALSE	FALSE
chr12	1691069	1788674	ADIPOR2	0	+	300	251	plus	551	0.0444646	acp7_c4_rnaAligned	5.6452	0.0407706	0.247907	FALSE	ADIPOR2_plus	FALSE	FALSE	FALSE	FALSE
chr10	86968481	86970915	ADIRF	0	+	652	512	plus	1164	0.0601375	acp6_c1_rnaAligned	478.225	4.53e-05	0.00090845	TRUE	ADIRF_plus	FALSE	FALSE	FALSE	FALSE
chr10	86968481	86970915	ADIRF	0	+	660	352	plus	1012	0.152174	acp6_c2_rnaAligned	415.776	2.33e-22	2.4e-20	TRUE	ADIRF_plus	FALSE	FALSE	FALSE	FALSE
chr10	86968481	86970915	ADIRF	0	+	535	431	plus	966	0.0538302	acp6_c5_rnaAligned	396.878	0.00091043	0.0150557	TRUE	ADIRF_plus	FALSE	FALSE	FALSE	FALSE
chr10	86968481	86970915	ADIRF	0	+	416	331	plus	747	0.0568942	acp6_c6_rnaAligned	306.902	0.00209581	0.0275288	TRUE	ADIRF_plus	FALSE	FALSE	FALSE	FALSE
chr20	3753507	3767753	ADISSP	0	-	219	198	minus	417	0.0251799	acp6_c1_rnaAligned	29.2714	0.327385	0.71962	FALSE	ADISSP_minus	FALSE	FALSE	FALSE	FALSE
chr20	3753507	3767753	ADISSP	0	-	167	144	minus	311	0.0369775	acp6_c2_rnaAligned	21.8307	0.212144	0.579009	FALSE	ADISSP_minus	FALSE	FALSE	FALSE	FALSE
chr20	3753507	3767753	ADISSP	0	-	95	69	minus	164	0.0792683	acp6_c5_rnaAligned	11.512	0.0505857	0.287596	FALSE	ADISSP_minus	FALSE	FALSE	FALSE	FALSE
chr20	3753507	3767753	ADISSP	0	-	170	166	minus	336	0.00595238	acp6_c6_rnaAligned	23.5856	0.870027	1	FALSE	ADISSP_minus	FALSE	FALSE	FALSE	FALSE
chr20	3753507	3767753	ADISSP	0	-	9	10	minus	19	-0.0263158	acp7_c1_rnaAligned	1.33371	1	1	FALSE	ADISSP_minus	FALSE	FALSE	FALSE	FALSE
chr20	3753507	3767753	ADISSP	0	-	6	4	minus	10	0.1	acp7_c2_rnaAligned	0.701951	0.753906	0.997646	FALSE	ADISSP_minus	FALSE	FALSE	FALSE	FALSE
chr20	3753507	3767753	ADISSP	0	-	11	7	minus	18	0.111111	acp7_c4_rnaAligned	1.26351	0.480682	0.86701	FALSE	ADISSP_minus	FALSE	FALSE	FALSE	FALSE
chr10	74151220	74709290	ADK	0	+	33	42	plus	75	-0.06	acp6_c1_rnaAligned	0.134392	0.355699	0.746649	FALSE	ADK_plus	FALSE	FALSE	FALSE	FALSE
chr10	74151220	74709290	ADK	0	+	63	48	plus	111	0.0675676	acp6_c2_rnaAligned	0.1989	0.183657	0.537448	FALSE	ADK_plus	FALSE	FALSE	FALSE	FALSE
chr10	74151220	74709290	ADK	0	+	42	36	plus	78	0.0384615	acp6_c5_rnaAligned	0.139767	0.571587	0.925806	FALSE	ADK_plus	FALSE	FALSE	FALSE	FALSE
chr10	74151220	74709290	ADK	0	+	56	51	plus	107	0.0233645	acp6_c6_rnaAligned	0.191732	0.699175	0.972325	FALSE	ADK_plus	FALSE	FALSE	FALSE	FALSE
chr10	74151220	74709290	ADK	0	+	149	163	plus	312	-0.0224359	acp7_c1_rnaAligned	0.55907	0.461798	0.863719	FALSE	ADK_plus	FALSE	FALSE	FALSE	FALSE
chr10	74151220	74709290	ADK	0	+	121	116	plus	237	0.0105485	acp7_c2_rnaAligned	0.424678	0.795063	1	FALSE	ADK_plus	FALSE	FALSE	FALSE	FALSE
chr10	74151220	74709290	ADK	0	+	72	83	plus	155	-0.0354839	acp7_c4_rnaAligned	0.277743	0.421939	0.822067	FALSE	ADK_plus	FALSE	FALSE	FALSE	FALSE
chr22	50481542	50486437	ADM2	0	+	5	5	plus	10	0	acp6_c1_rnaAligned	2.0429	1	1	FALSE	ADM2_plus	FALSE	FALSE	FALSE	FALSE
chr22	50481542	50486437	ADM2	0	+	10	16	plus	26	-0.115385	acp6_c2_rnaAligned	5.31154	0.32694	0.723601	FALSE	ADM2_plus	FALSE	FALSE	FALSE	FALSE
chr22	50481542	50486437	ADM2	0	+	15	20	plus	35	-0.0714286	acp6_c6_rnaAligned	7.15015	0.49956	0.869139	FALSE	ADM2_plus	FALSE	FALSE	FALSE	FALSE
chr20	50888917	50931437	ADNP	0	-	179	176	minus	355	0.00422535	acp7_c1_rnaAligned	8.34901	0.915484	1	FALSE	ADNP_minus	FALSE	FALSE	FALSE	FALSE
chr20	50888917	50931437	ADNP	0	-	174	180	minus	354	-0.0084746	acp7_c2_rnaAligned	8.32549	0.790479	1	FALSE	ADNP_minus	FALSE	FALSE	FALSE	FALSE
chr20	50888917	50931437	ADNP	0	-	164	149	minus	313	0.0239617	acp7_c4_rnaAligned	7.36124	0.4288	0.825578	FALSE	ADNP_minus	FALSE	FALSE	FALSE	FALSE
chr18	80109261	80140346	ADNP2	0	+	184	170	plus	354	0.019774	acp6_c1_rnaAligned	11.3881	0.489656	0.842987	FALSE	ADNP2_plus	FALSE	FALSE	FALSE	FALSE
chr18	80109261	80140346	ADNP2	0	+	214	213	plus	427	0.00117096	acp6_c2_rnaAligned	13.7365	1	1	FALSE	ADNP2_plus	FALSE	FALSE	FALSE	FALSE
chr18	80109261	80140346	ADNP2	0	+	147	155	plus	302	-0.013245	acp6_c5_rnaAligned	9.7153	0.687161	0.974047	FALSE	ADNP2_plus	FALSE	FALSE	FALSE	FALSE
chr18	80109261	80140346	ADNP2	0	+	248	234	plus	482	0.0145228	acp6_c6_rnaAligned	15.5059	0.553806	0.898222	FALSE	ADNP2_plus	FALSE	FALSE	FALSE	FALSE
chr10	62804719	62808479	ADO	0	+	35	36	plus	71	-0.0070423	acp7_c1_rnaAligned	18.883	1	1	FALSE	ADO_plus	FALSE	FALSE	FALSE	FALSE
chr10	62804719	62808479	ADO	0	+	36	43	plus	79	-0.0443038	acp7_c2_rnaAligned	21.0106	0.499897	0.872028	FALSE	ADO_plus	FALSE	FALSE	FALSE	FALSE
chr10	62804719	62808479	ADO	0	+	52	33	plus	85	0.111765	acp7_c4_rnaAligned	22.6064	0.0502509	0.284803	FALSE	ADO_plus	FALSE	FALSE	FALSE	FALSE
chr1	203127725	203167405	ADORA1	0	+	7	5	plus	12	0.0833333	acp6_c5_rnaAligned	0.302419	0.774414	1	FALSE	ADORA1_plus	FALSE	FALSE	FALSE	FALSE
chr15	72751293	72783758	ADPGK	0	-	160	176	minus	336	-0.0238095	acp6_c1_rnaAligned	10.3496	0.413215	0.789811	FALSE	ADPGK_minus	FALSE	FALSE	FALSE	FALSE
chr15	72751293	72783758	ADPGK	0	-	161	149	minus	310	0.0193548	acp6_c2_rnaAligned	9.54874	0.532198	0.889888	FALSE	ADPGK_minus	FALSE	FALSE	FALSE	FALSE
chr15	72751293	72783758	ADPGK	0	-	148	137	minus	285	0.0192982	acp6_c5_rnaAligned	8.77868	0.553693	0.91961	FALSE	ADPGK_minus	FALSE	FALSE	FALSE	FALSE
chr15	72751293	72783758	ADPGK	0	-	154	159	minus	313	-0.0079872	acp6_c6_rnaAligned	9.64115	0.821173	1	FALSE	ADPGK_minus	FALSE	FALSE	FALSE	FALSE
chr3	119579491	119589945	ADPRH	0	+	6	7	plus	13	-0.0384615	acp6_c6_rnaAligned	1.24354	1	1	FALSE	ADPRH_plus	FALSE	FALSE	FALSE	FALSE
chr13	113399609	113453488	ADPRHL1	0	-	8	9	minus	17	-0.0294118	acp6_c1_rnaAligned	0.315522	1	1	FALSE	ADPRHL1_minus	FALSE	FALSE	FALSE	FALSE
chr13	113399609	113453488	ADPRHL1	0	-	8	6	minus	14	0.0714286	acp6_c2_rnaAligned	0.259842	0.790527	1	FALSE	ADPRHL1_minus	FALSE	FALSE	FALSE	FALSE
chr13	113399609	113453488	ADPRHL1	0	-	11	8	minus	19	0.0789474	acp6_c5_rnaAligned	0.352642	0.647606	0.956557	FALSE	ADPRHL1_minus	FALSE	FALSE	FALSE	FALSE
chr17	10697593	10711558	ADPRM	0	+	53	51	plus	104	0.00961538	acp6_c1_rnaAligned	7.44719	0.921949	1	FALSE	ADPRM_plus	FALSE	FALSE	FALSE	FALSE
chr17	10697593	10711558	ADPRM	0	+	89	53	plus	142	0.126761	acp6_c2_rnaAligned	10.1683	0.00317187	0.0359711	TRUE	ADPRM_plus	FALSE	FALSE	FALSE	FALSE
chr17	10697593	10711558	ADPRM	0	+	53	30	plus	83	0.138554	acp6_c5_rnaAligned	5.94343	0.0152322	0.131091	FALSE	ADPRM_plus	FALSE	FALSE	FALSE	FALSE
chr17	10697593	10711558	ADPRM	0	+	72	61	plus	133	0.0413534	acp6_c6_rnaAligned	9.52381	0.385959	0.784698	FALSE	ADPRM_plus	FALSE	FALSE	FALSE	FALSE
chr20	4220629	4249287	ADRA1D	0	-	13	8	minus	21	0.119048	acp6_c6_rnaAligned	0.73278	0.38331	0.782726	FALSE	ADRA1D_minus	FALSE	FALSE	FALSE	FALSE
chr20	4220629	4249287	ADRA1D	0	-	10	8	minus	18	0.0555556	acp7_c1_rnaAligned	0.628097	0.814529	1	FALSE	ADRA1D_minus	FALSE	FALSE	FALSE	FALSE
chr20	4220629	4249287	ADRA1D	0	-	12	6	minus	18	0.166667	acp7_c2_rnaAligned	0.628097	0.237885	0.626236	FALSE	ADRA1D_minus	FALSE	FALSE	FALSE	FALSE
chr20	4220629	4249287	ADRA1D	0	-	6	6	minus	12	0	acp7_c4_rnaAligned	0.418731	1	1	FALSE	ADRA1D_minus	FALSE	FALSE	FALSE	FALSE
chr5	148826610	148828623	ADRB2	0	+	11	15	plus	26	-0.0769231	acp6_c1_rnaAligned	12.916	0.557197	0.890475	FALSE	ADRB2_plus	FALSE	FALSE	FALSE	FALSE
chr5	148826610	148828623	ADRB2	0	+	63	40	plus	103	0.11165	acp6_c2_rnaAligned	51.1674	0.0296822	0.178089	FALSE	ADRB2_plus	FALSE	FALSE	FALSE	FALSE
chr5	148826610	148828623	ADRB2	0	+	27	24	plus	51	0.0294118	acp6_c5_rnaAligned	25.3353	0.779768	1	FALSE	ADRB2_plus	FALSE	FALSE	FALSE	FALSE
chr5	148826610	148828623	ADRB2	0	+	36	30	plus	66	0.0454546	acp6_c6_rnaAligned	32.7869	0.538583	0.89401	FALSE	ADRB2_plus	FALSE	FALSE	FALSE	FALSE
chr5	148826610	148828623	ADRB2	0	+	13	27	plus	40	-0.175	acp7_c1_rnaAligned	19.8708	0.0384773	0.243389	FALSE	ADRB2_plus	FALSE	FALSE	FALSE	FALSE
chr5	148826610	148828623	ADRB2	0	+	21	20	plus	41	0.0121951	acp7_c2_rnaAligned	20.3676	1	1	FALSE	ADRB2_plus	FALSE	FALSE	FALSE	FALSE
chr5	148826610	148828623	ADRB2	0	+	12	29	plus	41	-0.207317	acp7_c4_rnaAligned	20.3676	0.0115078	0.10357	FALSE	ADRB2_plus	TRUE	FALSE	FALSE	FALSE
chr20	62302895	62308862	ADRM1	0	+	6	6	plus	12	0	acp6_c1_rnaAligned	2.01106	1	1	FALSE	ADRM1_plus	FALSE	FALSE	FALSE	FALSE
chr20	62302895	62308862	ADRM1	0	+	3	8	plus	11	-0.227273	acp6_c5_rnaAligned	1.84347	0.226562	0.645188	FALSE	ADRM1_plus	TRUE	FALSE	FALSE	FALSE
chr20	62302895	62308862	ADRM1	0	+	11	5	plus	16	0.1875	acp6_c6_rnaAligned	2.68141	0.210114	0.603031	FALSE	ADRM1_plus	FALSE	FALSE	FALSE	FALSE
chr22	40346499	40387527	ADSL	0	+	15	18	plus	33	-0.0454545	acp6_c1_rnaAligned	0.804329	0.728332	0.98827	FALSE	ADSL_plus	FALSE	FALSE	FALSE	FALSE
chr22	40346499	40387527	ADSL	0	+	24	16	plus	40	0.1	acp6_c2_rnaAligned	0.974944	0.268187	0.647768	FALSE	ADSL_plus	FALSE	FALSE	FALSE	FALSE
chr22	40346499	40387527	ADSL	0	+	25	18	plus	43	0.0813954	acp6_c5_rnaAligned	1.04806	0.360378	0.786278	FALSE	ADSL_plus	FALSE	FALSE	FALSE	FALSE
chr22	40346499	40387527	ADSL	0	+	21	20	plus	41	0.0121951	acp6_c6_rnaAligned	0.999318	1	1	FALSE	ADSL_plus	FALSE	FALSE	FALSE	FALSE
chr22	40346499	40387527	ADSL	0	+	7	2	plus	9	0.277778	acp7_c1_rnaAligned	0.219362	0.179688	0.572932	FALSE	ADSL_plus	TRUE	FALSE	FALSE	FALSE
chr14	104724228	104747325	ADSS1	0	+	4	8	plus	12	-0.166667	acp6_c1_rnaAligned	0.519548	0.387695	0.767418	FALSE	ADSS1_plus	FALSE	FALSE	FALSE	FALSE
chr14	104724228	104747325	ADSS1	0	+	6	5	plus	11	0.0454546	acp6_c5_rnaAligned	0.476252	1	1	FALSE	ADSS1_plus	FALSE	FALSE	FALSE	FALSE
chr14	104724228	104747325	ADSS1	0	+	6	11	plus	17	-0.147059	acp6_c6_rnaAligned	0.736026	0.332306	0.737842	FALSE	ADSS1_plus	FALSE	FALSE	FALSE	FALSE
chr14	104724228	104747325	ADSS1	0	+	21	16	plus	37	0.0675676	acp7_c1_rnaAligned	1.60194	0.511376	0.893625	FALSE	ADSS1_plus	FALSE	FALSE	FALSE	FALSE
chr14	104724228	104747325	ADSS1	0	+	16	12	plus	28	0.0714286	acp7_c2_rnaAligned	1.21228	0.571588	0.909776	FALSE	ADSS1_plus	FALSE	FALSE	FALSE	FALSE
chr14	104724228	104747325	ADSS1	0	+	8	3	plus	11	0.227273	acp7_c4_rnaAligned	0.476252	0.226562	0.633004	FALSE	ADSS1_plus	TRUE	FALSE	FALSE	FALSE
chr1	244408493	244452060	ADSS2	0	-	57	72	minus	129	-0.0581395	acp6_c1_rnaAligned	2.96096	0.217561	0.590712	FALSE	ADSS2_minus	FALSE	FALSE	FALSE	FALSE
chr1	244408493	244452060	ADSS2	0	-	100	91	minus	191	0.0235602	acp6_c2_rnaAligned	4.38405	0.562798	0.903243	FALSE	ADSS2_minus	FALSE	FALSE	FALSE	FALSE
chr1	244408493	244452060	ADSS2	0	-	51	58	minus	109	-0.0321101	acp6_c5_rnaAligned	2.50189	0.5657	0.925806	FALSE	ADSS2_minus	FALSE	FALSE	FALSE	FALSE
chr1	244408493	244452060	ADSS2	0	-	76	86	minus	162	-0.0308642	acp6_c6_rnaAligned	3.71841	0.479615	0.850598	FALSE	ADSS2_minus	FALSE	FALSE	FALSE	FALSE
chr1	244408493	244452060	ADSS2	0	-	84	86	minus	170	-0.0058824	acp7_c1_rnaAligned	3.90204	0.938895	1	FALSE	ADSS2_minus	FALSE	FALSE	FALSE	FALSE
chr1	244408493	244452060	ADSS2	0	-	77	60	minus	137	0.0620438	acp7_c2_rnaAligned	3.14458	0.171409	0.539275	FALSE	ADSS2_minus	FALSE	FALSE	FALSE	FALSE
chr1	244408493	244452060	ADSS2	0	-	63	40	minus	103	0.11165	acp7_c4_rnaAligned	2.36417	0.0296822	0.202539	FALSE	ADSS2_minus	FALSE	FALSE	FALSE	FALSE
chr6	11713522	11778803	ADTRP	0	-	9	11	minus	20	-0.05	acp6_c1_rnaAligned	0.306368	0.823803	1	FALSE	ADTRP_minus	FALSE	FALSE	FALSE	FALSE
chr6	11713522	11778803	ADTRP	0	-	9	15	minus	24	-0.125	acp6_c2_rnaAligned	0.367641	0.307456	0.698507	FALSE	ADTRP_minus	FALSE	FALSE	FALSE	FALSE
chr6	11713522	11778803	ADTRP	0	-	14	13	minus	27	0.0185185	acp6_c5_rnaAligned	0.413597	1	1	FALSE	ADTRP_minus	FALSE	FALSE	FALSE	FALSE
chr6	11713522	11778803	ADTRP	0	-	29	33	minus	62	-0.0322581	acp6_c6_rnaAligned	0.94974	0.703537	0.974454	FALSE	ADTRP_minus	FALSE	FALSE	FALSE	FALSE
chr6	11713522	11778803	ADTRP	0	-	9	16	minus	25	-0.14	acp7_c1_rnaAligned	0.38296	0.229523	0.643857	FALSE	ADTRP_minus	FALSE	FALSE	FALSE	FALSE
chr6	11713522	11778803	ADTRP	0	-	4	15	minus	19	-0.289474	acp7_c2_rnaAligned	0.291049	0.0192108	0.147684	FALSE	ADTRP_minus	TRUE	FALSE	FALSE	FALSE
chr6	11713522	11778803	ADTRP	0	-	4	10	minus	14	-0.214286	acp7_c4_rnaAligned	0.214457	0.179565	0.555239	FALSE	ADTRP_minus	TRUE	FALSE	FALSE	FALSE
chr7	44104344	44114560	AEBP1	0	+	85	81	plus	166	0.0120482	acp6_c1_rnaAligned	16.249	0.815968	1	FALSE	AEBP1_plus	FALSE	FALSE	FALSE	FALSE
chr7	44104344	44114560	AEBP1	0	+	414	505	plus	919	-0.0495103	acp6_c2_rnaAligned	89.9569	0.00296893	0.0339717	TRUE	AEBP1_plus	FALSE	FALSE	FALSE	FALSE
chr7	44104344	44114560	AEBP1	0	+	229	329	plus	558	-0.0896057	acp6_c5_rnaAligned	54.6202	2.65e-05	0.00079783	TRUE	AEBP1_plus	FALSE	FALSE	FALSE	FALSE
chr7	44104344	44114560	AEBP1	0	+	490	658	plus	1148	-0.0731707	acp6_c6_rnaAligned	112.373	7.92e-07	2.56e-05	TRUE	AEBP1_plus	FALSE	FALSE	FALSE	FALSE
chr7	44104344	44114560	AEBP1	0	+	206	286	plus	492	-0.0813008	acp7_c1_rnaAligned	48.1597	0.00035874	0.0070774	TRUE	AEBP1_plus	FALSE	FALSE	FALSE	FALSE
chr7	44104344	44114560	AEBP1	0	+	200	271	plus	471	-0.0753715	acp7_c2_rnaAligned	46.1042	0.00123428	0.0188518	TRUE	AEBP1_plus	FALSE	FALSE	FALSE	FALSE
chr7	44104344	44114560	AEBP1	0	+	206	302	plus	508	-0.0944882	acp7_c4_rnaAligned	49.7259	2.37e-05	0.00061252	TRUE	AEBP1_plus	FALSE	FALSE	FALSE	FALSE
chr12	19404071	19522227	AEBP2	0	+	85	74	plus	159	0.0345912	acp6_c1_rnaAligned	1.34568	0.42784	0.797252	FALSE	AEBP2_plus	FALSE	FALSE	FALSE	FALSE
chr12	19404071	19522227	AEBP2	0	+	111	106	plus	217	0.0115207	acp6_c2_rnaAligned	1.83656	0.786052	1	FALSE	AEBP2_plus	FALSE	FALSE	FALSE	FALSE
chr12	19404071	19522227	AEBP2	0	+	68	90	plus	158	-0.0696203	acp6_c5_rnaAligned	1.33722	0.0944745	0.406308	FALSE	AEBP2_plus	FALSE	FALSE	FALSE	FALSE
chr12	19404071	19522227	AEBP2	0	+	125	123	plus	248	0.00403226	acp6_c6_rnaAligned	2.09892	0.949385	1	FALSE	AEBP2_plus	FALSE	FALSE	FALSE	FALSE
chr12	19404071	19522227	AEBP2	0	+	204	196	plus	400	0.01	acp7_c1_rnaAligned	3.38535	0.726387	1	FALSE	AEBP2_plus	FALSE	FALSE	FALSE	FALSE
chr12	19404071	19522227	AEBP2	0	+	184	176	plus	360	0.0111111	acp7_c2_rnaAligned	3.04682	0.712233	0.987911	FALSE	AEBP2_plus	FALSE	FALSE	FALSE	FALSE
chr12	19404071	19522227	AEBP2	0	+	146	141	plus	287	0.0087108	acp7_c4_rnaAligned	2.42899	0.813396	1	FALSE	AEBP2_plus	FALSE	FALSE	FALSE	FALSE
chr15	88604682	88632281	AEN	0	+	237	240	plus	477	-0.0031447	acp7_c1_rnaAligned	17.2832	0.927049	1	FALSE	AEN_plus	FALSE	FALSE	FALSE	FALSE
chr15	88604682	88632281	AEN	0	+	153	179	plus	332	-0.0391566	acp7_c2_rnaAligned	12.0294	0.169952	0.536989	FALSE	AEN_plus	FALSE	FALSE	FALSE	FALSE
chr15	88604682	88632281	AEN	0	+	160	157	plus	317	0.00473186	acp7_c4_rnaAligned	11.4859	0.910584	1	FALSE	AEN_plus	FALSE	FALSE	FALSE	FALSE
chr4	7758712	7939861	AFAP1	0	-	287	300	minus	587	-0.0110733	acp6_c1_rnaAligned	3.24043	0.620431	0.927763	FALSE	AFAP1_minus	FALSE	FALSE	FALSE	FALSE
chr4	7758712	7939861	AFAP1	0	-	424	450	minus	874	-0.0148741	acp6_c2_rnaAligned	4.82476	0.397768	0.782946	FALSE	AFAP1_minus	FALSE	FALSE	FALSE	FALSE
chr4	7758712	7939861	AFAP1	0	-	306	281	minus	587	0.0212947	acp6_c5_rnaAligned	3.24043	0.321889	0.757408	FALSE	AFAP1_minus	FALSE	FALSE	FALSE	FALSE
chr4	7758712	7939861	AFAP1	0	-	388	417	minus	805	-0.0180124	acp6_c6_rnaAligned	4.44386	0.323708	0.732611	FALSE	AFAP1_minus	FALSE	FALSE	FALSE	FALSE
chr4	7758712	7939861	AFAP1	0	-	1112	965	minus	2077	0.0353876	acp7_c1_rnaAligned	11.4657	0.00135173	0.0217723	TRUE	AFAP1_minus	FALSE	FALSE	FALSE	FALSE
chr4	7758712	7939861	AFAP1	0	-	428	390	minus	818	0.0232274	acp7_c2_rnaAligned	4.51562	0.195747	0.572668	FALSE	AFAP1_minus	FALSE	FALSE	FALSE	FALSE
chr4	7758712	7939861	AFAP1	0	-	381	434	minus	815	-0.0325153	acp7_c4_rnaAligned	4.49906	0.0684682	0.340776	FALSE	AFAP1_minus	FALSE	FALSE	FALSE	FALSE
chr5	149271858	149343637	AFAP1L1	0	+	19	17	plus	36	0.0277778	acp7_c1_rnaAligned	0.501539	0.867939	1	FALSE	AFAP1L1_plus	FALSE	FALSE	FALSE	FALSE
chr5	149271858	149343637	AFAP1L1	0	+	11	5	plus	16	0.1875	acp7_c2_rnaAligned	0.222906	0.210114	0.591401	FALSE	AFAP1L1_plus	FALSE	FALSE	FALSE	FALSE
chr5	149271858	149343637	AFAP1L1	0	+	9	4	plus	13	0.192308	acp7_c4_rnaAligned	0.181111	0.266846	0.675333	FALSE	AFAP1L1_plus	FALSE	FALSE	FALSE	FALSE
chr6	167826563	167972023	AFDN	0	+	71	51	plus	122	0.0819672	acp6_c1_rnaAligned	0.838719	0.0849807	0.354416	FALSE	AFDN_plus	FALSE	FALSE	FALSE	FALSE
chr6	167826563	167972023	AFDN	0	+	64	56	plus	120	0.0333333	acp6_c2_rnaAligned	0.824969	0.522991	0.880951	FALSE	AFDN_plus	FALSE	FALSE	FALSE	FALSE
chr6	167826563	167972023	AFDN	0	+	51	50	plus	101	0.0049505	acp6_c5_rnaAligned	0.694349	1	1	FALSE	AFDN_plus	FALSE	FALSE	FALSE	FALSE
chr6	167826563	167972023	AFDN	0	+	88	61	plus	149	0.090604	acp6_c6_rnaAligned	1.02434	0.0328218	0.203998	FALSE	AFDN_plus	FALSE	FALSE	FALSE	FALSE
chr6	167826563	167972023	AFDN	0	+	200	218	plus	418	-0.0215311	acp7_c1_rnaAligned	2.87364	0.405722	0.819224	FALSE	AFDN_plus	FALSE	FALSE	FALSE	FALSE
chr6	167826563	167972023	AFDN	0	+	194	188	plus	382	0.0078534	acp7_c2_rnaAligned	2.62615	0.798129	1	FALSE	AFDN_plus	FALSE	FALSE	FALSE	FALSE
chr6	167826563	167972023	AFDN	0	+	160	161	plus	321	-0.0015576	acp7_c4_rnaAligned	2.20679	1	1	FALSE	AFDN_plus	FALSE	FALSE	FALSE	FALSE
chr4	86935010	87141039	AFF1	0	+	32	37	plus	69	-0.0362319	acp6_c1_rnaAligned	0.334904	0.630456	0.930476	FALSE	AFF1_plus	FALSE	FALSE	FALSE	FALSE
chr4	86935010	87141039	AFF1	0	+	30	35	plus	65	-0.0384615	acp6_c2_rnaAligned	0.31549	0.620145	0.9339	FALSE	AFF1_plus	FALSE	FALSE	FALSE	FALSE
chr4	86935010	87141039	AFF1	0	+	31	32	plus	63	-0.0079365	acp6_c5_rnaAligned	0.305782	1	1	FALSE	AFF1_plus	FALSE	FALSE	FALSE	FALSE
chr4	86935010	87141039	AFF1	0	+	49	35	plus	84	0.0833333	acp6_c6_rnaAligned	0.40771	0.155656	0.511956	FALSE	AFF1_plus	FALSE	FALSE	FALSE	FALSE
chr4	86935010	87141039	AFF1	0	+	217	194	plus	411	0.0279805	acp7_c1_rnaAligned	1.99486	0.277825	0.712667	FALSE	AFF1_plus	FALSE	FALSE	FALSE	FALSE
chr4	86935010	87141039	AFF1	0	+	153	115	plus	268	0.0708955	acp7_c2_rnaAligned	1.30079	0.0236332	0.169091	FALSE	AFF1_plus	FALSE	FALSE	FALSE	FALSE
chr4	86935010	87141039	AFF1	0	+	117	146	plus	263	-0.0551331	acp7_c4_rnaAligned	1.27652	0.0840528	0.3828	FALSE	AFF1_plus	FALSE	FALSE	FALSE	FALSE
chr2	99545418	100142590	AFF3	0	-	99	51	minus	150	0.16	acp6_c1_rnaAligned	0.251184	0.00010978	0.00197142	TRUE	AFF3_minus	FALSE	FALSE	FALSE	FALSE
chr2	99545418	100142590	AFF3	0	-	83	170	minus	253	-0.171937	acp6_c2_rnaAligned	0.423664	4.78e-08	1.82e-06	TRUE	AFF3_minus	FALSE	FALSE	FALSE	FALSE
chr2	99545418	100142590	AFF3	0	-	20	34	minus	54	-0.12963	acp6_c5_rnaAligned	0.0904262	0.0759047	0.36385	FALSE	AFF3_minus	FALSE	FALSE	FALSE	FALSE
chr2	99545418	100142590	AFF3	0	-	105	147	minus	252	-0.0833333	acp6_c6_rnaAligned	0.421989	0.00966345	0.0899093	FALSE	AFF3_minus	FALSE	FALSE	FALSE	FALSE
chr2	99545418	100142590	AFF3	0	-	5	6	minus	11	-0.0454545	acp7_c1_rnaAligned	0.0184201	1	1	FALSE	AFF3_minus	FALSE	FALSE	FALSE	FALSE
chr2	99545418	100142590	AFF3	0	-	9	6	minus	15	0.1	acp7_c2_rnaAligned	0.0251184	0.607239	0.925913	FALSE	AFF3_minus	FALSE	FALSE	FALSE	FALSE
chr5	132875394	132963634	AFF4	0	-	408	439	minus	847	-0.0182999	acp6_c1_rnaAligned	9.59882	0.302626	0.69142	FALSE	AFF4_minus	FALSE	FALSE	FALSE	FALSE
chr5	132875394	132963634	AFF4	0	-	577	596	minus	1173	-0.0080989	acp6_c2_rnaAligned	13.2933	0.599212	0.920916	FALSE	AFF4_minus	FALSE	FALSE	FALSE	FALSE
chr5	132875394	132963634	AFF4	0	-	399	418	minus	817	-0.0116279	acp6_c5_rnaAligned	9.25884	0.52889	0.912408	FALSE	AFF4_minus	FALSE	FALSE	FALSE	FALSE
chr5	132875394	132963634	AFF4	0	-	472	505	minus	977	-0.0168884	acp6_c6_rnaAligned	11.0721	0.305942	0.714844	FALSE	AFF4_minus	FALSE	FALSE	FALSE	FALSE
chr5	132875394	132963634	AFF4	0	-	13	3	minus	16	0.3125	acp7_c1_rnaAligned	0.181324	0.0212708	0.168986	FALSE	AFF4_minus	TRUE	TRUE	FALSE	FALSE
chr5	132875394	132963634	AFF4	0	-	7	8	minus	15	-0.0333333	acp7_c2_rnaAligned	0.169991	1	1	FALSE	AFF4_minus	FALSE	FALSE	FALSE	FALSE
chr5	132875394	132963634	AFF4	0	-	10	5	minus	15	0.166667	acp7_c4_rnaAligned	0.169991	0.301758	0.709409	FALSE	AFF4_minus	FALSE	FALSE	FALSE	FALSE
chr4	122923077	123319433	AFG2A	0	+	15	12	plus	27	0.0555556	acp6_c1_rnaAligned	0.0681206	0.701108	0.974333	FALSE	AFG2A_plus	FALSE	FALSE	FALSE	FALSE
chr4	122923077	123319433	AFG2A	0	+	17	16	plus	33	0.0151515	acp6_c2_rnaAligned	0.0832585	1	1	FALSE	AFG2A_plus	FALSE	FALSE	FALSE	FALSE
chr4	122923077	123319433	AFG2A	0	+	15	8	plus	23	0.152174	acp6_c5_rnaAligned	0.0580286	0.21004	0.622782	FALSE	AFG2A_plus	FALSE	FALSE	FALSE	FALSE
chr4	122923077	123319433	AFG2A	0	+	16	15	plus	31	0.016129	acp6_c6_rnaAligned	0.0782125	1	1	FALSE	AFG2A_plus	FALSE	FALSE	FALSE	FALSE
chr4	122923077	123319433	AFG2A	0	+	168	171	plus	339	-0.0044248	acp7_c1_rnaAligned	0.855292	0.913521	1	FALSE	AFG2A_plus	FALSE	FALSE	FALSE	FALSE
chr4	122923077	123319433	AFG2A	0	+	145	161	plus	306	-0.0261438	acp7_c2_rnaAligned	0.772033	0.391207	0.777539	FALSE	AFG2A_plus	FALSE	FALSE	FALSE	FALSE
chr4	122923077	123319433	AFG2A	0	+	118	116	plus	234	0.0042735	acp7_c4_rnaAligned	0.590378	0.947896	1	FALSE	AFG2A_plus	FALSE	FALSE	FALSE	FALSE
chr18	12328943	12377227	AFG3L2	0	-	26	28	minus	54	-0.0185185	acp6_c1_rnaAligned	1.11838	0.891923	1	FALSE	AFG3L2_minus	FALSE	FALSE	FALSE	FALSE
chr18	12328943	12377227	AFG3L2	0	-	38	42	minus	80	-0.025	acp6_c2_rnaAligned	1.65686	0.737554	0.998108	FALSE	AFG3L2_minus	FALSE	FALSE	FALSE	FALSE
chr18	12328943	12377227	AFG3L2	0	-	30	26	minus	56	0.0357143	acp6_c5_rnaAligned	1.1598	0.68888	0.974047	FALSE	AFG3L2_minus	FALSE	FALSE	FALSE	FALSE
chr18	12328943	12377227	AFG3L2	0	-	40	57	minus	97	-0.0876289	acp6_c6_rnaAligned	2.00895	0.103769	0.414719	FALSE	AFG3L2_minus	FALSE	FALSE	FALSE	FALSE
chr18	12328943	12377227	AFG3L2	0	-	8	8	minus	16	0	acp7_c1_rnaAligned	0.331373	1	1	FALSE	AFG3L2_minus	FALSE	FALSE	FALSE	FALSE
chr18	12328943	12377227	AFG3L2	0	-	8	7	minus	15	0.0333333	acp7_c2_rnaAligned	0.310662	1	1	FALSE	AFG3L2_minus	FALSE	FALSE	FALSE	FALSE
chr18	12328943	12377227	AFG3L2	0	-	6	7	minus	13	-0.0384615	acp7_c4_rnaAligned	0.26924	1	1	FALSE	AFG3L2_minus	FALSE	FALSE	FALSE	FALSE
chr17	78187361	78207702	AFMID	0	+	77	64	plus	141	0.0460993	acp7_c1_rnaAligned	6.93181	0.312213	0.740721	FALSE	AFMID_plus	FALSE	FALSE	FALSE	FALSE
chr17	78187361	78207702	AFMID	0	+	41	39	plus	80	0.0125	acp7_c2_rnaAligned	3.93294	0.911072	1	FALSE	AFMID_plus	FALSE	FALSE	FALSE	FALSE
chr17	78187361	78207702	AFMID	0	+	47	44	plus	91	0.0164835	acp7_c4_rnaAligned	4.47372	0.834081	1	FALSE	AFMID_plus	FALSE	FALSE	FALSE	FALSE
chr2	64524327	64593005	AFTPH	0	+	22	24	plus	46	-0.0217391	acp6_c1_rnaAligned	0.669792	0.882996	1	FALSE	AFTPH_plus	FALSE	FALSE	FALSE	FALSE
chr2	64524327	64593005	AFTPH	0	+	31	26	plus	57	0.0438597	acp6_c2_rnaAligned	0.82996	0.596642	0.918947	FALSE	AFTPH_plus	FALSE	FALSE	FALSE	FALSE
chr2	64524327	64593005	AFTPH	0	+	6	19	plus	25	-0.26	acp6_c5_rnaAligned	0.364018	0.0146333	0.127764	FALSE	AFTPH_plus	TRUE	FALSE	FALSE	FALSE
chr2	64524327	64593005	AFTPH	0	+	16	29	plus	45	-0.144444	acp6_c6_rnaAligned	0.655232	0.0724543	0.342654	FALSE	AFTPH_plus	FALSE	FALSE	FALSE	FALSE
chr2	64524327	64593005	AFTPH	0	+	24	30	plus	54	-0.0555556	acp7_c1_rnaAligned	0.786278	0.496617	0.891397	FALSE	AFTPH_plus	FALSE	FALSE	FALSE	FALSE
chr2	64524327	64593005	AFTPH	0	+	31	27	plus	58	0.0344828	acp7_c2_rnaAligned	0.844521	0.694004	0.980691	FALSE	AFTPH_plus	FALSE	FALSE	FALSE	FALSE
chr2	64524327	64593005	AFTPH	0	+	26	36	plus	62	-0.0806452	acp7_c4_rnaAligned	0.902764	0.252854	0.665672	FALSE	AFTPH_plus	FALSE	FALSE	FALSE	FALSE
chr4	177430773	177442437	AGA	0	-	6	7	minus	13	-0.0384615	acp6_c1_rnaAligned	1.11454	1	1	FALSE	AGA_minus	FALSE	FALSE	FALSE	FALSE
chr4	177430773	177442437	AGA	0	-	7	10	minus	17	-0.0882353	acp6_c2_rnaAligned	1.45748	0.629059	0.937596	FALSE	AGA_minus	FALSE	FALSE	FALSE	FALSE
chr4	177430773	177442437	AGA	0	-	19	22	minus	41	-0.0365854	acp7_c1_rnaAligned	3.51509	0.755229	1	FALSE	AGA_minus	FALSE	FALSE	FALSE	FALSE
chr4	177430773	177442437	AGA	0	-	19	21	minus	40	-0.025	acp7_c2_rnaAligned	3.42936	0.874629	1	FALSE	AGA_minus	FALSE	FALSE	FALSE	FALSE
chr4	177430773	177442437	AGA	0	-	18	13	minus	31	0.0806452	acp7_c4_rnaAligned	2.65775	0.47313	0.863394	FALSE	AGA_minus	FALSE	FALSE	FALSE	FALSE
chr2	235494042	236131793	AGAP1	0	+	308	353	plus	661	-0.0340393	acp6_c1_rnaAligned	1.03645	0.0869302	0.358665	FALSE	AGAP1_plus	FALSE	FALSE	FALSE	FALSE
chr2	235494042	236131793	AGAP1	0	+	313	370	plus	683	-0.0417277	acp6_c2_rnaAligned	1.07095	0.0320552	0.188968	FALSE	AGAP1_plus	FALSE	FALSE	FALSE	FALSE
chr2	235494042	236131793	AGAP1	0	+	264	241	plus	505	0.0227723	acp6_c5_rnaAligned	0.791845	0.32759	0.761133	FALSE	AGAP1_plus	FALSE	FALSE	FALSE	FALSE
chr2	235494042	236131793	AGAP1	0	+	336	395	plus	731	-0.0403557	acp6_c6_rnaAligned	1.14622	0.0318658	0.199451	FALSE	AGAP1_plus	FALSE	FALSE	FALSE	FALSE
chr2	235494042	236131793	AGAP1	0	+	196	202	plus	398	-0.0075377	acp7_c1_rnaAligned	0.624068	0.80214	1	FALSE	AGAP1_plus	FALSE	FALSE	FALSE	FALSE
chr2	235494042	236131793	AGAP1	0	+	231	197	plus	428	0.0397196	acp7_c2_rnaAligned	0.671108	0.110579	0.432225	FALSE	AGAP1_plus	FALSE	FALSE	FALSE	FALSE
chr2	235494042	236131793	AGAP1	0	+	136	126	plus	262	0.019084	acp7_c4_rnaAligned	0.410819	0.57828	0.923748	FALSE	AGAP1_plus	FALSE	FALSE	FALSE	FALSE
chr7	151085866	151144434	AGAP3	0	+	90	79	plus	169	0.0325444	acp6_c1_rnaAligned	2.88553	0.44185	0.811417	FALSE	AGAP3_plus	FALSE	FALSE	FALSE	FALSE
chr7	151085866	151144434	AGAP3	0	+	45	39	plus	84	0.0357143	acp6_c2_rnaAligned	1.43423	0.585647	0.911242	FALSE	AGAP3_plus	FALSE	FALSE	FALSE	FALSE
chr7	151085866	151144434	AGAP3	0	+	65	66	plus	131	-0.0038168	acp6_c5_rnaAligned	2.23672	1	1	FALSE	AGAP3_plus	FALSE	FALSE	FALSE	FALSE
chr7	151085866	151144434	AGAP3	0	+	73	70	plus	143	0.0104895	acp6_c6_rnaAligned	2.44161	0.86725	1	FALSE	AGAP3_plus	FALSE	FALSE	FALSE	FALSE
chr7	151085866	151144434	AGAP3	0	+	66	50	plus	116	0.0689655	acp7_c1_rnaAligned	1.9806	0.163423	0.559973	FALSE	AGAP3_plus	FALSE	FALSE	FALSE	FALSE
chr7	151085866	151144434	AGAP3	0	+	65	46	plus	111	0.0855856	acp7_c2_rnaAligned	1.89523	0.0870891	0.38035	FALSE	AGAP3_plus	FALSE	FALSE	FALSE	FALSE
chr7	151085866	151144434	AGAP3	0	+	60	56	plus	116	0.0172414	acp7_c4_rnaAligned	1.9806	0.780739	1	FALSE	AGAP3_plus	FALSE	FALSE	FALSE	FALSE
chr10	45825593	45854690	AGAP4	0	-	26	8	minus	34	0.264706	acp6_c1_rnaAligned	1.16851	0.00293506	0.0327043	TRUE	AGAP4_minus	TRUE	FALSE	FALSE	FALSE
chr10	45825593	45854690	AGAP4	0	-	13	12	minus	25	0.02	acp6_c2_rnaAligned	0.859195	1	1	FALSE	AGAP4_minus	FALSE	FALSE	FALSE	FALSE
chr10	45825593	45854690	AGAP4	0	-	7	3	minus	10	0.2	acp6_c5_rnaAligned	0.343678	0.34375	0.771025	FALSE	AGAP4_minus	FALSE	FALSE	FALSE	FALSE
chr10	45825593	45854690	AGAP4	0	-	22	5	minus	27	0.314815	acp6_c6_rnaAligned	0.927931	0.00151372	0.0216772	TRUE	AGAP4_minus	TRUE	TRUE	FALSE	FALSE
chr10	45825593	45854690	AGAP4	0	-	12	0	minus	12	0.5	acp7_c1_rnaAligned	0.412414	0.00048828	0.00924333	TRUE	AGAP4_minus	TRUE	TRUE	TRUE	TRUE
chr10	73674294	73698109	AGAP5	0	-	10	2	minus	12	0.333333	acp6_c5_rnaAligned	0.503884	0.0385742	0.241994	FALSE	AGAP5_minus	TRUE	TRUE	FALSE	FALSE
chr10	73674294	73698109	AGAP5	0	-	8	6	minus	14	0.0714286	acp7_c1_rnaAligned	0.587865	0.790527	1	FALSE	AGAP5_minus	FALSE	FALSE	FALSE	FALSE
chr10	49988405	50010499	AGAP6	0	+	21	11	plus	32	0.15625	acp6_c1_rnaAligned	1.44836	0.110184	0.406434	FALSE	AGAP6_plus	FALSE	FALSE	FALSE	FALSE
chr10	49988405	50010499	AGAP6	0	+	25	29	plus	54	-0.037037	acp6_c2_rnaAligned	2.4441	0.683489	0.966231	FALSE	AGAP6_plus	FALSE	FALSE	FALSE	FALSE
chr10	49988405	50010499	AGAP6	0	+	14	24	plus	38	-0.131579	acp6_c5_rnaAligned	1.71992	0.143307	0.511537	FALSE	AGAP6_plus	FALSE	FALSE	FALSE	FALSE
chr10	49988405	50010499	AGAP6	0	+	36	29	plus	65	0.0538462	acp6_c6_rnaAligned	2.94198	0.457021	0.837973	FALSE	AGAP6_plus	FALSE	FALSE	FALSE	FALSE
chr10	49988405	50010499	AGAP6	0	+	64	27	plus	91	0.203297	acp7_c1_rnaAligned	4.11877	0.00013216	0.00310123	TRUE	AGAP6_plus	TRUE	FALSE	FALSE	FALSE
chr10	49988405	50010499	AGAP6	0	+	25	12	plus	37	0.175676	acp7_c2_rnaAligned	1.67466	0.047031	0.263289	FALSE	AGAP6_plus	FALSE	FALSE	FALSE	FALSE
chr10	49988405	50010499	AGAP6	0	+	28	7	plus	35	0.3	acp7_c4_rnaAligned	1.58414	0.00050826	0.00889114	TRUE	AGAP6_plus	TRUE	TRUE	FALSE	FALSE
chr10	47501853	47523638	AGAP9	0	-	5	8	minus	13	-0.115385	acp7_c1_rnaAligned	0.596741	0.581055	0.930394	FALSE	AGAP9_minus	FALSE	FALSE	FALSE	FALSE
chr10	47501853	47523638	AGAP9	0	-	6	7	minus	13	-0.0384615	acp7_c2_rnaAligned	0.596741	1	1	FALSE	AGAP9_minus	FALSE	FALSE	FALSE	FALSE
chr10	47501853	47523638	AGAP9	0	-	4	10	minus	14	-0.214286	acp7_c4_rnaAligned	0.642644	0.179565	0.555239	FALSE	AGAP9_minus	TRUE	FALSE	FALSE	FALSE
chr7	134986507	135135778	AGBL3	0	+	12	12	plus	24	0	acp7_c1_rnaAligned	0.160781	1	1	FALSE	AGBL3_plus	FALSE	FALSE	FALSE	FALSE
chr7	134986507	135135778	AGBL3	0	+	12	9	plus	21	0.0714286	acp7_c2_rnaAligned	0.140684	0.663624	0.960493	FALSE	AGBL3_plus	FALSE	FALSE	FALSE	FALSE
chr7	134986507	135135778	AGBL3	0	+	10	11	plus	21	-0.0238095	acp7_c4_rnaAligned	0.140684	1	1	FALSE	AGBL3_plus	FALSE	FALSE	FALSE	FALSE
chr1	48522510	50023954	AGBL4	0	-	5	11	minus	16	-0.1875	acp6_c1_rnaAligned	0.0106564	0.210114	0.576916	FALSE	AGBL4_minus	FALSE	FALSE	FALSE	FALSE
chr1	48522510	50023954	AGBL4	0	-	6	7	minus	13	-0.0384615	acp6_c6_rnaAligned	0.00865833	1	1	FALSE	AGBL4_minus	FALSE	FALSE	FALSE	FALSE
chr2	27050363	27070618	AGBL5	0	+	8	3	plus	11	0.227273	acp6_c6_rnaAligned	0.543076	0.226562	0.625621	FALSE	AGBL5_plus	TRUE	FALSE	FALSE	FALSE
chr2	27050363	27070618	AGBL5	0	+	4	5	plus	9	-0.0555556	acp7_c1_rnaAligned	0.444335	1	1	FALSE	AGBL5_plus	FALSE	FALSE	FALSE	FALSE
chr2	227472155	227561217	AGFG1	0	+	21	35	plus	56	-0.125	acp7_c1_rnaAligned	0.628775	0.0814268	0.385031	FALSE	AGFG1_plus	FALSE	FALSE	FALSE	FALSE
chr2	227472155	227561217	AGFG1	0	+	18	24	plus	42	-0.0714286	acp7_c2_rnaAligned	0.471582	0.440799	0.82531	FALSE	AGFG1_plus	FALSE	FALSE	FALSE	FALSE
chr2	227472155	227561217	AGFG1	0	+	25	24	plus	49	0.0102041	acp7_c4_rnaAligned	0.550179	1	1	FALSE	AGFG1_plus	FALSE	FALSE	FALSE	FALSE
chr5	77030403	77065234	AGGF1	0	+	89	70	plus	159	0.0597484	acp7_c1_rnaAligned	4.5649	0.153215	0.538887	FALSE	AGGF1_plus	FALSE	FALSE	FALSE	FALSE
chr5	77030403	77065234	AGGF1	0	+	67	74	plus	141	-0.0248227	acp7_c2_rnaAligned	4.04812	0.613513	0.930959	FALSE	AGGF1_plus	FALSE	FALSE	FALSE	FALSE
chr5	77030403	77065234	AGGF1	0	+	67	66	plus	133	0.0037594	acp7_c4_rnaAligned	3.81844	1	1	FALSE	AGGF1_plus	FALSE	FALSE	FALSE	FALSE
chr7	141551409	141655244	AGK	0	+	13	15	plus	28	-0.0357143	acp6_c1_rnaAligned	0.269659	0.850554	1	FALSE	AGK_plus	FALSE	FALSE	FALSE	FALSE
chr7	141551409	141655244	AGK	0	+	9	26	plus	35	-0.242857	acp6_c2_rnaAligned	0.337073	0.00598812	0.0580086	FALSE	AGK_plus	TRUE	FALSE	FALSE	FALSE
chr7	141551409	141655244	AGK	0	+	23	5	plus	28	0.321429	acp6_c5_rnaAligned	0.269659	0.00091223	0.0150557	TRUE	AGK_plus	TRUE	TRUE	FALSE	FALSE
chr7	141551409	141655244	AGK	0	+	19	6	plus	25	0.26	acp6_c6_rnaAligned	0.240767	0.0146333	0.12188	FALSE	AGK_plus	TRUE	FALSE	FALSE	FALSE
chr7	141551409	141655244	AGK	0	+	14	1	plus	15	0.433333	acp7_c1_rnaAligned	0.14446	0.00097656	0.0164203	TRUE	AGK_plus	TRUE	TRUE	TRUE	FALSE
chr7	141551409	141655244	AGK	0	+	8	2	plus	10	0.3	acp7_c2_rnaAligned	0.0963066	0.109375	0.429593	FALSE	AGK_plus	TRUE	TRUE	FALSE	FALSE
chr7	15158180	15562015	AGMO	0	-	11	8	minus	19	0.0789474	acp6_c5_rnaAligned	0.0470489	0.647606	0.956557	FALSE	AGMO_minus	FALSE	FALSE	FALSE	FALSE
chr7	15158180	15562015	AGMO	0	-	10	6	minus	16	0.125	acp6_c6_rnaAligned	0.0396201	0.454498	0.835945	FALSE	AGMO_minus	FALSE	FALSE	FALSE	FALSE
chr1	35869760	35930532	AGO1	0	+	7	13	plus	20	-0.15	acp6_c1_rnaAligned	0.329099	0.263176	0.64487	FALSE	AGO1_plus	FALSE	FALSE	FALSE	FALSE
chr1	35869760	35930532	AGO1	0	+	7	9	plus	16	-0.0625	acp6_c2_rnaAligned	0.263279	0.803619	1	FALSE	AGO1_plus	FALSE	FALSE	FALSE	FALSE
chr1	35869760	35930532	AGO1	0	+	4	6	plus	10	-0.1	acp6_c5_rnaAligned	0.164549	0.753906	0.997325	FALSE	AGO1_plus	FALSE	FALSE	FALSE	FALSE
chr1	35869760	35930532	AGO1	0	+	7	5	plus	12	0.0833333	acp6_c6_rnaAligned	0.197459	0.774414	0.999495	FALSE	AGO1_plus	FALSE	FALSE	FALSE	FALSE
chr1	35869760	35930532	AGO1	0	+	6	3	plus	9	0.166667	acp7_c1_rnaAligned	0.148095	0.507812	0.891397	FALSE	AGO1_plus	FALSE	FALSE	FALSE	FALSE
chr8	140520155	140642313	AGO2	0	-	128	132	minus	260	-0.0076923	acp6_c1_rnaAligned	2.12839	0.852449	1	FALSE	AGO2_minus	FALSE	FALSE	FALSE	FALSE
chr8	140520155	140642313	AGO2	0	-	165	145	minus	310	0.0322581	acp6_c2_rnaAligned	2.5377	0.28051	0.667288	FALSE	AGO2_minus	FALSE	FALSE	FALSE	FALSE
chr8	140520155	140642313	AGO2	0	-	109	128	minus	237	-0.0400844	acp6_c5_rnaAligned	1.94011	0.242253	0.663712	FALSE	AGO2_minus	FALSE	FALSE	FALSE	FALSE
chr8	140520155	140642313	AGO2	0	-	119	140	minus	259	-0.0405405	acp6_c6_rnaAligned	2.1202	0.213884	0.608949	FALSE	AGO2_minus	FALSE	FALSE	FALSE	FALSE
chr8	140520155	140642313	AGO2	0	-	34	43	minus	77	-0.0584416	acp7_c1_rnaAligned	0.630331	0.362032	0.784806	FALSE	AGO2_minus	FALSE	FALSE	FALSE	FALSE
chr8	140520155	140642313	AGO2	0	-	46	40	minus	86	0.0348837	acp7_c2_rnaAligned	0.704006	0.590036	0.917319	FALSE	AGO2_minus	FALSE	FALSE	FALSE	FALSE
chr8	140520155	140642313	AGO2	0	-	23	23	minus	46	0	acp7_c4_rnaAligned	0.376561	1	1	FALSE	AGO2_minus	FALSE	FALSE	FALSE	FALSE
chr1	35930717	36072500	AGO3	0	+	13	17	plus	30	-0.0666667	acp6_c1_rnaAligned	0.211591	0.584665	0.906461	FALSE	AGO3_plus	FALSE	FALSE	FALSE	FALSE
chr1	35930717	36072500	AGO3	0	+	16	10	plus	26	0.115385	acp6_c2_rnaAligned	0.183379	0.32694	0.723601	FALSE	AGO3_plus	FALSE	FALSE	FALSE	FALSE
chr1	35930717	36072500	AGO3	0	+	9	13	plus	22	-0.0909091	acp6_c5_rnaAligned	0.155167	0.523467	0.906995	FALSE	AGO3_plus	FALSE	FALSE	FALSE	FALSE
chr1	35930717	36072500	AGO3	0	+	13	12	plus	25	0.02	acp6_c6_rnaAligned	0.176326	1	1	FALSE	AGO3_plus	FALSE	FALSE	FALSE	FALSE
chr1	35930717	36072500	AGO3	0	+	25	19	plus	44	0.0681818	acp7_c1_rnaAligned	0.310333	0.451381	0.860381	FALSE	AGO3_plus	FALSE	FALSE	FALSE	FALSE
chr1	35930717	36072500	AGO3	0	+	18	12	plus	30	0.1	acp7_c2_rnaAligned	0.211591	0.361595	0.752277	FALSE	AGO3_plus	FALSE	FALSE	FALSE	FALSE
chr1	35930717	36072500	AGO3	0	+	8	14	plus	22	-0.136364	acp7_c4_rnaAligned	0.155167	0.286279	0.697154	FALSE	AGO3_plus	FALSE	FALSE	FALSE	FALSE
chr1	35807635	35857890	AGO4	0	+	30	32	plus	62	-0.016129	acp6_c1_rnaAligned	1.23371	0.899076	1	FALSE	AGO4_plus	FALSE	FALSE	FALSE	FALSE
chr1	35807635	35857890	AGO4	0	+	31	40	plus	71	-0.0633803	acp6_c2_rnaAligned	1.41279	0.342471	0.733123	FALSE	AGO4_plus	FALSE	FALSE	FALSE	FALSE
chr1	35807635	35857890	AGO4	0	+	22	25	plus	47	-0.0319149	acp6_c5_rnaAligned	0.93523	0.770867	1	FALSE	AGO4_plus	FALSE	FALSE	FALSE	FALSE
chr1	35807635	35857890	AGO4	0	+	33	39	plus	72	-0.0416667	acp6_c6_rnaAligned	1.43269	0.555998	0.900187	FALSE	AGO4_plus	FALSE	FALSE	FALSE	FALSE
chr9	136673142	136687457	AGPAT2	0	-	7	6	minus	13	0.0384615	acp6_c6_rnaAligned	0.908138	1	1	FALSE	AGPAT2_minus	FALSE	FALSE	FALSE	FALSE
chr9	136673142	136687457	AGPAT2	0	-	28	19	minus	47	0.0957447	acp7_c1_rnaAligned	3.28327	0.24296	0.665444	FALSE	AGPAT2_minus	FALSE	FALSE	FALSE	FALSE
chr9	136673142	136687457	AGPAT2	0	-	17	24	minus	41	-0.0853659	acp7_c2_rnaAligned	2.86413	0.348889	0.741119	FALSE	AGPAT2_minus	FALSE	FALSE	FALSE	FALSE
chr9	136673142	136687457	AGPAT2	0	-	17	22	minus	39	-0.0641026	acp7_c4_rnaAligned	2.72441	0.522397	0.891254	FALSE	AGPAT2_minus	FALSE	FALSE	FALSE	FALSE
chr21	43865222	43987592	AGPAT3	0	+	94	92	plus	186	0.00537634	acp6_c1_rnaAligned	1.51998	0.941575	1	FALSE	AGPAT3_plus	FALSE	FALSE	FALSE	FALSE
chr21	43865222	43987592	AGPAT3	0	+	94	75	plus	169	0.056213	acp6_c2_rnaAligned	1.38106	0.165979	0.508065	FALSE	AGPAT3_plus	FALSE	FALSE	FALSE	FALSE
chr21	43865222	43987592	AGPAT3	0	+	63	68	plus	131	-0.019084	acp6_c5_rnaAligned	1.07052	0.726876	0.993504	FALSE	AGPAT3_plus	FALSE	FALSE	FALSE	FALSE
chr21	43865222	43987592	AGPAT3	0	+	87	81	plus	168	0.0178571	acp6_c6_rnaAligned	1.37289	0.699797	0.972558	FALSE	AGPAT3_plus	FALSE	FALSE	FALSE	FALSE
chr21	43865222	43987592	AGPAT3	0	+	224	247	plus	471	-0.0244161	acp7_c1_rnaAligned	3.84898	0.310721	0.738159	FALSE	AGPAT3_plus	FALSE	FALSE	FALSE	FALSE
chr21	43865222	43987592	AGPAT3	0	+	138	218	plus	356	-0.11236	acp7_c2_rnaAligned	2.90921	2.63e-05	0.00066906	TRUE	AGPAT3_plus	FALSE	FALSE	FALSE	FALSE
chr21	43865222	43987592	AGPAT3	0	+	160	152	plus	312	0.0128205	acp7_c4_rnaAligned	2.54964	0.691952	0.986956	FALSE	AGPAT3_plus	FALSE	FALSE	FALSE	FALSE
chr6	161129966	161274061	AGPAT4	0	-	279	266	minus	545	0.0119266	acp6_c1_rnaAligned	3.78223	0.607276	0.917901	FALSE	AGPAT4_minus	FALSE	FALSE	FALSE	FALSE
chr6	161129966	161274061	AGPAT4	0	-	361	349	minus	710	0.0084507	acp6_c2_rnaAligned	4.9273	0.679766	0.96381	FALSE	AGPAT4_minus	FALSE	FALSE	FALSE	FALSE
chr6	161129966	161274061	AGPAT4	0	-	238	232	minus	470	0.00638298	acp6_c5_rnaAligned	3.26174	0.81763	1	FALSE	AGPAT4_minus	FALSE	FALSE	FALSE	FALSE
chr6	161129966	161274061	AGPAT4	0	-	245	279	minus	524	-0.0324427	acp6_c6_rnaAligned	3.63649	0.149342	0.502008	FALSE	AGPAT4_minus	FALSE	FALSE	FALSE	FALSE
chr6	161129966	161274061	AGPAT4	0	-	172	150	minus	322	0.0341615	acp7_c1_rnaAligned	2.23464	0.241842	0.664445	FALSE	AGPAT4_minus	FALSE	FALSE	FALSE	FALSE
chr6	161129966	161274061	AGPAT4	0	-	119	135	minus	254	-0.0314961	acp7_c2_rnaAligned	1.76273	0.34663	0.740361	FALSE	AGPAT4_minus	FALSE	FALSE	FALSE	FALSE
chr6	161129966	161274061	AGPAT4	0	-	291	191	minus	482	0.103734	acp7_c4_rnaAligned	3.34502	6.05e-06	0.00017833	TRUE	AGPAT4_minus	FALSE	FALSE	FALSE	FALSE
chr8	6708641	6761503	AGPAT5	0	+	214	189	plus	403	0.0310174	acp6_c1_rnaAligned	7.62362	0.231841	0.606222	FALSE	AGPAT5_plus	FALSE	FALSE	FALSE	FALSE
chr8	6708641	6761503	AGPAT5	0	+	164	176	plus	340	-0.0176471	acp6_c2_rnaAligned	6.43184	0.550865	0.895009	FALSE	AGPAT5_plus	FALSE	FALSE	FALSE	FALSE
chr8	6708641	6761503	AGPAT5	0	+	156	147	plus	303	0.0148515	acp6_c5_rnaAligned	5.73191	0.645884	0.956557	FALSE	AGPAT5_plus	FALSE	FALSE	FALSE	FALSE
chr8	6708641	6761503	AGPAT5	0	+	212	208	plus	420	0.0047619	acp6_c6_rnaAligned	7.94522	0.88364	1	FALSE	AGPAT5_plus	FALSE	FALSE	FALSE	FALSE
chr8	6708641	6761503	AGPAT5	0	+	5	4	plus	9	0.0555556	acp7_c1_rnaAligned	0.170255	1	1	FALSE	AGPAT5_plus	FALSE	FALSE	FALSE	FALSE
chr2	177392772	177543834	AGPS	0	+	10	11	plus	21	-0.0238095	acp7_c1_rnaAligned	0.139016	1	1	FALSE	AGPS_plus	FALSE	FALSE	FALSE	FALSE
chr1	1020119	1056116	AGRN	0	+	55	68	plus	123	-0.0528455	acp6_c1_rnaAligned	3.41695	0.279199	0.662777	FALSE	AGRN_plus	FALSE	FALSE	FALSE	FALSE
chr1	1020119	1056116	AGRN	0	+	54	42	plus	96	0.0625	acp6_c2_rnaAligned	2.66689	0.261469	0.645481	FALSE	AGRN_plus	FALSE	FALSE	FALSE	FALSE
chr1	1020119	1056116	AGRN	0	+	60	49	plus	109	0.0504587	acp6_c5_rnaAligned	3.02803	0.338185	0.771025	FALSE	AGRN_plus	FALSE	FALSE	FALSE	FALSE
chr1	1020119	1056116	AGRN	0	+	78	77	plus	155	0.00322581	acp6_c6_rnaAligned	4.30591	1	1	FALSE	AGRN_plus	FALSE	FALSE	FALSE	FALSE
chr1	1020119	1056116	AGRN	0	+	85	77	plus	162	0.0246914	acp7_c1_rnaAligned	4.50038	0.582476	0.931394	FALSE	AGRN_plus	FALSE	FALSE	FALSE	FALSE
chr1	1020119	1056116	AGRN	0	+	45	51	plus	96	-0.03125	acp7_c2_rnaAligned	2.66689	0.610068	0.927244	FALSE	AGRN_plus	FALSE	FALSE	FALSE	FALSE
chr1	1020119	1056116	AGRN	0	+	42	54	plus	96	-0.0625	acp7_c4_rnaAligned	2.66689	0.261469	0.675333	FALSE	AGRN_plus	FALSE	FALSE	FALSE	FALSE
chr1	230702522	230745583	AGT	0	-	10	9	minus	19	0.0263158	acp6_c1_rnaAligned	0.441235	1	1	FALSE	AGT_minus	FALSE	FALSE	FALSE	FALSE
chr9	85546538	85805483	AGTPBP1	0	-	41	43	minus	84	-0.0119048	acp6_c1_rnaAligned	0.324393	0.913202	1	FALSE	AGTPBP1_minus	FALSE	FALSE	FALSE	FALSE
chr9	85546538	85805483	AGTPBP1	0	-	65	58	minus	123	0.0284553	acp6_c2_rnaAligned	0.475004	0.588688	0.914926	FALSE	AGTPBP1_minus	FALSE	FALSE	FALSE	FALSE
chr9	85546538	85805483	AGTPBP1	0	-	31	27	minus	58	0.0344828	acp6_c5_rnaAligned	0.223986	0.694004	0.975947	FALSE	AGTPBP1_minus	FALSE	FALSE	FALSE	FALSE
chr9	85546538	85805483	AGTPBP1	0	-	35	42	minus	77	-0.0454545	acp6_c6_rnaAligned	0.29736	0.494382	0.864385	FALSE	AGTPBP1_minus	FALSE	FALSE	FALSE	FALSE
chr9	85546538	85805483	AGTPBP1	0	-	69	98	minus	167	-0.0868263	acp7_c1_rnaAligned	0.644925	0.0299512	0.208176	FALSE	AGTPBP1_minus	FALSE	FALSE	FALSE	FALSE
chr9	85546538	85805483	AGTPBP1	0	-	69	80	minus	149	-0.0369128	acp7_c2_rnaAligned	0.575412	0.412743	0.799318	FALSE	AGTPBP1_minus	FALSE	FALSE	FALSE	FALSE
chr9	85546538	85805483	AGTPBP1	0	-	52	60	minus	112	-0.0357143	acp7_c4_rnaAligned	0.432524	0.508513	0.881504	FALSE	AGTPBP1_minus	FALSE	FALSE	FALSE	FALSE
chr3	148697902	148743003	AGTR1	0	+	4	8	plus	12	-0.166667	acp6_c5_rnaAligned	0.266069	0.387695	0.801445	FALSE	AGTR1_plus	FALSE	FALSE	FALSE	FALSE
chr3	148697902	148743003	AGTR1	0	+	2	11	plus	13	-0.346154	acp6_c6_rnaAligned	0.288242	0.0224609	0.158203	FALSE	AGTR1_plus	TRUE	TRUE	FALSE	FALSE
chr3	148697902	148743003	AGTR1	0	+	43	32	plus	75	0.0733333	acp7_c1_rnaAligned	1.66293	0.248046	0.672093	FALSE	AGTR1_plus	FALSE	FALSE	FALSE	FALSE
chr3	148697902	148743003	AGTR1	0	+	18	36	plus	54	-0.166667	acp7_c2_rnaAligned	1.19731	0.0198343	0.151328	FALSE	AGTR1_plus	FALSE	FALSE	FALSE	FALSE
chr3	148697902	148743003	AGTR1	0	+	11	3	plus	14	0.285714	acp7_c4_rnaAligned	0.310414	0.0573731	0.309463	FALSE	AGTR1_plus	TRUE	FALSE	FALSE	FALSE
chr1	11736135	11750769	AGTRAP	0	+	202	170	plus	372	0.0430108	acp6_c1_rnaAligned	25.4203	0.107869	0.405376	FALSE	AGTRAP_plus	FALSE	FALSE	FALSE	FALSE
chr1	11736135	11750769	AGTRAP	0	+	208	164	plus	372	0.0591398	acp6_c2_rnaAligned	25.4203	0.0256522	0.161238	FALSE	AGTRAP_plus	FALSE	FALSE	FALSE	FALSE
chr1	11736135	11750769	AGTRAP	0	+	136	101	plus	237	0.0738397	acp6_c5_rnaAligned	16.1952	0.0269965	0.193047	FALSE	AGTRAP_plus	FALSE	FALSE	FALSE	FALSE
chr1	11736135	11750769	AGTRAP	0	+	240	211	plus	451	0.0321508	acp6_c6_rnaAligned	30.8186	0.187287	0.570055	FALSE	AGTRAP_plus	FALSE	FALSE	FALSE	FALSE
chr1	11736135	11750769	AGTRAP	0	+	128	82	plus	210	0.109524	acp7_c1_rnaAligned	14.3501	0.00183246	0.0275654	TRUE	AGTRAP_plus	FALSE	FALSE	FALSE	FALSE
chr1	11736135	11750769	AGTRAP	0	+	77	78	plus	155	-0.0032258	acp7_c2_rnaAligned	10.5918	1	1	FALSE	AGTRAP_plus	FALSE	FALSE	FALSE	FALSE
chr1	11736135	11750769	AGTRAP	0	+	139	102	plus	241	0.0767635	acp7_c4_rnaAligned	16.4685	0.020206	0.157226	FALSE	AGTRAP_plus	FALSE	FALSE	FALSE	FALSE
chr1	246839097	246931948	AHCTF1	0	-	240	231	minus	471	0.00955414	acp6_c1_rnaAligned	5.07264	0.712453	0.979463	FALSE	AHCTF1_minus	FALSE	FALSE	FALSE	FALSE
chr1	246839097	246931948	AHCTF1	0	-	214	241	minus	455	-0.0296703	acp6_c2_rnaAligned	4.90032	0.222842	0.593394	FALSE	AHCTF1_minus	FALSE	FALSE	FALSE	FALSE
chr1	246839097	246931948	AHCTF1	0	-	205	220	minus	425	-0.0176471	acp6_c5_rnaAligned	4.57723	0.49712	0.887083	FALSE	AHCTF1_minus	FALSE	FALSE	FALSE	FALSE
chr1	246839097	246931948	AHCTF1	0	-	275	268	minus	543	0.00644567	acp6_c6_rnaAligned	5.84808	0.796833	1	FALSE	AHCTF1_minus	FALSE	FALSE	FALSE	FALSE
chr1	246839097	246931948	AHCTF1	0	-	229	217	minus	446	0.0134529	acp7_c1_rnaAligned	4.80339	0.60251	0.943649	FALSE	AHCTF1_minus	FALSE	FALSE	FALSE	FALSE
chr1	246839097	246931948	AHCTF1	0	-	172	168	minus	340	0.00588235	acp7_c2_rnaAligned	3.66178	0.870787	1	FALSE	AHCTF1_minus	FALSE	FALSE	FALSE	FALSE
chr1	246839097	246931948	AHCTF1	0	-	154	141	minus	295	0.0220339	acp7_c4_rnaAligned	3.17713	0.484824	0.872485	FALSE	AHCTF1_minus	FALSE	FALSE	FALSE	FALSE
chr20	34231980	34311836	AHCY	0	-	32	60	minus	92	-0.152174	acp6_c1_rnaAligned	1.15207	0.00460911	0.0459135	TRUE	AHCY_minus	FALSE	FALSE	FALSE	FALSE
chr20	34231980	34311836	AHCY	0	-	40	30	minus	70	0.0714286	acp6_c2_rnaAligned	0.876578	0.281979	0.668429	FALSE	AHCY_minus	FALSE	FALSE	FALSE	FALSE
chr20	34231980	34311836	AHCY	0	-	33	35	minus	68	-0.0147059	acp6_c5_rnaAligned	0.851533	0.903597	1	FALSE	AHCY_minus	FALSE	FALSE	FALSE	FALSE
chr20	34231980	34311836	AHCY	0	-	44	60	minus	104	-0.0769231	acp6_c6_rnaAligned	1.30234	0.140956	0.489731	FALSE	AHCY_minus	FALSE	FALSE	FALSE	FALSE
chr1	109984764	110023742	AHCYL1	0	+	16	23	plus	39	-0.0897436	acp6_c1_rnaAligned	1.00056	0.336784	0.727949	FALSE	AHCYL1_plus	FALSE	FALSE	FALSE	FALSE
chr1	109984764	110023742	AHCYL1	0	+	30	27	plus	57	0.0263158	acp6_c2_rnaAligned	1.46236	0.791366	1	FALSE	AHCYL1_plus	FALSE	FALSE	FALSE	FALSE
chr1	109984764	110023742	AHCYL1	0	+	20	21	plus	41	-0.0121951	acp6_c5_rnaAligned	1.05188	1	1	FALSE	AHCYL1_plus	FALSE	FALSE	FALSE	FALSE
chr1	109984764	110023742	AHCYL1	0	+	21	32	plus	53	-0.103774	acp6_c6_rnaAligned	1.35974	0.168978	0.537166	FALSE	AHCYL1_plus	FALSE	FALSE	FALSE	FALSE
chr1	109984764	110023742	AHCYL1	0	+	29	20	plus	49	0.0918367	acp7_c1_rnaAligned	1.25712	0.25287	0.682967	FALSE	AHCYL1_plus	FALSE	FALSE	FALSE	FALSE
chr1	109984764	110023742	AHCYL1	0	+	23	17	plus	40	0.075	acp7_c2_rnaAligned	1.02622	0.429591	0.811371	FALSE	AHCYL1_plus	FALSE	FALSE	FALSE	FALSE
chr1	109984764	110023742	AHCYL1	0	+	13	9	plus	22	0.0909091	acp7_c4_rnaAligned	0.564421	0.523467	0.891254	FALSE	AHCYL1_plus	FALSE	FALSE	FALSE	FALSE
chr7	129225029	129430211	AHCYL2	0	+	7	7	plus	14	0	acp6_c2_rnaAligned	0.0682321	1	1	FALSE	AHCYL2_plus	FALSE	FALSE	FALSE	FALSE
chr7	129225029	129430211	AHCYL2	0	+	37	20	plus	57	0.149123	acp7_c1_rnaAligned	0.277802	0.033144	0.222474	FALSE	AHCYL2_plus	FALSE	FALSE	FALSE	FALSE
chr7	129225029	129430211	AHCYL2	0	+	23	24	plus	47	-0.0106383	acp7_c2_rnaAligned	0.229065	1	1	FALSE	AHCYL2_plus	FALSE	FALSE	FALSE	FALSE
chr7	129225029	129430211	AHCYL2	0	+	22	20	plus	42	0.0238095	acp7_c4_rnaAligned	0.204696	0.877614	1	FALSE	AHCYL2_plus	FALSE	FALSE	FALSE	FALSE
chr1	27534244	27604227	AHDC1	0	-	14	21	minus	35	-0.1	acp6_c1_rnaAligned	0.500121	0.310505	0.698549	FALSE	AHDC1_minus	FALSE	FALSE	FALSE	FALSE
chr1	27534244	27604227	AHDC1	0	-	15	15	minus	30	0	acp6_c2_rnaAligned	0.428676	1	1	FALSE	AHDC1_minus	FALSE	FALSE	FALSE	FALSE
chr1	27534244	27604227	AHDC1	0	-	14	16	minus	30	-0.0333333	acp6_c5_rnaAligned	0.428676	0.855536	1	FALSE	AHDC1_minus	FALSE	FALSE	FALSE	FALSE
chr1	27534244	27604227	AHDC1	0	-	20	12	minus	32	0.125	acp6_c6_rnaAligned	0.457254	0.215327	0.610512	FALSE	AHDC1_minus	FALSE	FALSE	FALSE	FALSE
chr6	135283531	135497740	AHI1	0	-	85	107	minus	192	-0.0572917	acp6_c1_rnaAligned	0.896321	0.129419	0.446282	FALSE	AHI1_minus	FALSE	FALSE	FALSE	FALSE
chr6	135283531	135497740	AHI1	0	-	119	178	minus	297	-0.0993266	acp6_c2_rnaAligned	1.3865	0.00073712	0.0108989	TRUE	AHI1_minus	FALSE	FALSE	FALSE	FALSE
chr6	135283531	135497740	AHI1	0	-	57	75	minus	132	-0.0681818	acp6_c5_rnaAligned	0.616221	0.138668	0.502996	FALSE	AHI1_minus	FALSE	FALSE	FALSE	FALSE
chr6	135283531	135497740	AHI1	0	-	124	109	minus	233	0.0321888	acp6_c6_rnaAligned	1.08772	0.359082	0.758825	FALSE	AHI1_minus	FALSE	FALSE	FALSE	FALSE
chr6	135283531	135497740	AHI1	0	-	17	25	minus	42	-0.0952381	acp7_c1_rnaAligned	0.19607	0.279956	0.714066	FALSE	AHI1_minus	FALSE	FALSE	FALSE	FALSE
chr6	135283531	135497740	AHI1	0	-	12	16	minus	28	-0.0714286	acp7_c2_rnaAligned	0.130713	0.571588	0.909776	FALSE	AHI1_minus	FALSE	FALSE	FALSE	FALSE
chr6	135283531	135497740	AHI1	0	-	11	15	minus	26	-0.0769231	acp7_c4_rnaAligned	0.121377	0.557197	0.909057	FALSE	AHI1_minus	FALSE	FALSE	FALSE	FALSE
chr11	62433543	62546806	AHNAK	0	-	6043	6217	minus	12260	-0.0070962	acp6_c1_rnaAligned	108.244	0.118183	0.422467	FALSE	AHNAK_minus	FALSE	FALSE	FALSE	FALSE
chr11	62433543	62546806	AHNAK	0	-	7823	9152	minus	16975	-0.0391458	acp6_c2_rnaAligned	149.872	2.02e-24	2.32e-22	TRUE	AHNAK_minus	FALSE	FALSE	FALSE	FALSE
chr11	62433543	62546806	AHNAK	0	-	9859	9755	minus	19614	0.00265117	acp6_c5_rnaAligned	173.172	0.462065	0.856776	FALSE	AHNAK_minus	FALSE	FALSE	FALSE	FALSE
chr11	62433543	62546806	AHNAK	0	-	5498	5852	minus	11350	-0.0155947	acp6_c6_rnaAligned	100.209	0.00092082	0.0146304	TRUE	AHNAK_minus	FALSE	FALSE	FALSE	FALSE
chr11	62433543	62546806	AHNAK	0	-	3241	3274	minus	6515	-0.0025326	acp7_c1_rnaAligned	57.521	0.691773	0.997006	FALSE	AHNAK_minus	FALSE	FALSE	FALSE	FALSE
chr11	62433543	62546806	AHNAK	0	-	3488	3671	minus	7159	-0.0127811	acp7_c2_rnaAligned	63.2069	0.0314672	0.204243	FALSE	AHNAK_minus	FALSE	FALSE	FALSE	FALSE
chr11	62433543	62546806	AHNAK	0	-	2557	2422	minus	4979	0.0135569	acp7_c4_rnaAligned	43.9596	0.0575485	0.309912	FALSE	AHNAK_minus	FALSE	FALSE	FALSE	FALSE
chr14	104937252	104978374	AHNAK2	0	-	270	347	minus	617	-0.0623987	acp6_c1_rnaAligned	15.0041	0.00219043	0.0259147	TRUE	AHNAK2_minus	FALSE	FALSE	FALSE	FALSE
chr14	104937252	104978374	AHNAK2	0	-	741	553	minus	1294	0.072643	acp6_c2_rnaAligned	31.4673	1.92e-07	6.59e-06	TRUE	AHNAK2_minus	FALSE	FALSE	FALSE	FALSE
chr14	104937252	104978374	AHNAK2	0	-	643	341	minus	984	0.153455	acp6_c5_rnaAligned	23.9288	3.96e-22	4.92e-20	TRUE	AHNAK2_minus	FALSE	FALSE	FALSE	FALSE
chr14	104937252	104978374	AHNAK2	0	-	853	521	minus	1374	0.120815	acp6_c6_rnaAligned	33.4128	2.88e-19	2.93e-17	TRUE	AHNAK2_minus	FALSE	FALSE	FALSE	FALSE
chr14	104937252	104978374	AHNAK2	0	-	1	10	minus	11	-0.409091	acp7_c1_rnaAligned	0.267497	0.0117188	0.109932	FALSE	AHNAK2_minus	TRUE	TRUE	TRUE	FALSE
chr14	104937252	104978374	AHNAK2	0	-	6	5	minus	11	0.0454546	acp7_c2_rnaAligned	0.267497	1	1	FALSE	AHNAK2_minus	FALSE	FALSE	FALSE	FALSE
chr14	104937252	104978374	AHNAK2	0	-	3	9	minus	12	-0.25	acp7_c4_rnaAligned	0.291815	0.145996	0.511309	FALSE	AHNAK2_minus	TRUE	FALSE	FALSE	FALSE
chr7	17298651	17346147	AHR	0	+	8	6	plus	14	0.0714286	acp6_c1_rnaAligned	0.294762	0.790527	1	FALSE	AHR_plus	FALSE	FALSE	FALSE	FALSE
chr7	17298651	17346147	AHR	0	+	41	36	plus	77	0.0324675	acp6_c2_rnaAligned	1.62119	0.648791	0.950837	FALSE	AHR_plus	FALSE	FALSE	FALSE	FALSE
chr7	17298651	17346147	AHR	0	+	9	8	plus	17	0.0294118	acp6_c5_rnaAligned	0.357925	1	1	FALSE	AHR_plus	FALSE	FALSE	FALSE	FALSE
chr7	17298651	17346147	AHR	0	+	27	21	plus	48	0.0625	acp6_c6_rnaAligned	1.01061	0.470879	0.847582	FALSE	AHR_plus	FALSE	FALSE	FALSE	FALSE
chr7	17298651	17346147	AHR	0	+	122	146	plus	268	-0.0447761	acp7_c1_rnaAligned	5.64258	0.15991	0.55299	FALSE	AHR_plus	FALSE	FALSE	FALSE	FALSE
chr7	17298651	17346147	AHR	0	+	98	100	plus	198	-0.0050505	acp7_c2_rnaAligned	4.16877	0.943368	1	FALSE	AHR_plus	FALSE	FALSE	FALSE	FALSE
chr7	17298651	17346147	AHR	0	+	94	115	plus	209	-0.0502392	acp7_c4_rnaAligned	4.40037	0.166379	0.54807	FALSE	AHR_plus	FALSE	FALSE	FALSE	FALSE
chr5	321713	438285	AHRR	0	+	621	340	plus	961	0.146202	acp6_c1_rnaAligned	8.24383	9.25e-20	7.52e-18	TRUE	AHRR_plus	FALSE	FALSE	FALSE	FALSE
chr5	321713	438285	AHRR	0	+	586	335	plus	921	0.136265	acp6_c2_rnaAligned	7.9007	1.14e-16	8.54e-15	TRUE	AHRR_plus	FALSE	FALSE	FALSE	FALSE
chr5	321713	438285	AHRR	0	+	536	307	plus	843	0.135824	acp6_c5_rnaAligned	7.23158	2.76e-15	2.28e-13	TRUE	AHRR_plus	FALSE	FALSE	FALSE	FALSE
chr5	321713	438285	AHRR	0	+	716	415	plus	1131	0.133068	acp6_c6_rnaAligned	9.70216	2.87e-19	2.93e-17	TRUE	AHRR_plus	FALSE	FALSE	FALSE	FALSE
chr5	321713	438285	AHRR	0	+	987	979	plus	1966	0.00203459	acp7_c1_rnaAligned	16.8651	0.874562	1	FALSE	AHRR_plus	FALSE	FALSE	FALSE	FALSE
chr5	321713	438285	AHRR	0	+	1151	1238	plus	2389	-0.0182085	acp7_c2_rnaAligned	20.4938	0.07847	0.354275	FALSE	AHRR_plus	FALSE	FALSE	FALSE	FALSE
chr5	321713	438285	AHRR	0	+	973	1038	plus	2011	-0.0161611	acp7_c4_rnaAligned	17.2511	0.153515	0.523317	FALSE	AHRR_plus	FALSE	FALSE	FALSE	FALSE
chr1	222668012	222712491	AIDA	0	-	12	14	minus	26	-0.0384615	acp6_c1_rnaAligned	0.584546	0.845019	1	FALSE	AIDA_minus	FALSE	FALSE	FALSE	FALSE
chr1	222668012	222712491	AIDA	0	-	7	15	minus	22	-0.181818	acp6_c2_rnaAligned	0.494615	0.133801	0.451972	FALSE	AIDA_minus	FALSE	FALSE	FALSE	FALSE
chr1	222668012	222712491	AIDA	0	-	4	13	minus	17	-0.264706	acp6_c5_rnaAligned	0.382203	0.0490418	0.282514	FALSE	AIDA_minus	TRUE	FALSE	FALSE	FALSE
chr1	222668012	222712491	AIDA	0	-	5	15	minus	20	-0.25	acp6_c6_rnaAligned	0.44965	0.0413895	0.239803	FALSE	AIDA_minus	TRUE	FALSE	FALSE	FALSE
chr1	222668012	222712491	AIDA	0	-	19	7	minus	26	0.230769	acp7_c1_rnaAligned	0.584546	0.0289593	0.204316	FALSE	AIDA_minus	TRUE	FALSE	FALSE	FALSE
chr1	222668012	222712491	AIDA	0	-	6	9	minus	15	-0.1	acp7_c2_rnaAligned	0.337238	0.607239	0.925913	FALSE	AIDA_minus	FALSE	FALSE	FALSE	FALSE
chr1	222668012	222712491	AIDA	0	-	11	12	minus	23	-0.0217391	acp7_c4_rnaAligned	0.517098	1	1	FALSE	AIDA_minus	FALSE	FALSE	FALSE	FALSE
chr10	70112270	70132825	AIFM2	0	-	4	9	minus	13	-0.192308	acp6_c2_rnaAligned	0.63245	0.266846	0.646637	FALSE	AIFM2_minus	FALSE	FALSE	FALSE	FALSE
chr10	70112270	70132825	AIFM2	0	-	6	5	minus	11	0.0454546	acp6_c5_rnaAligned	0.53515	1	1	FALSE	AIFM2_minus	FALSE	FALSE	FALSE	FALSE
chr10	70112270	70132825	AIFM2	0	-	4	9	minus	13	-0.192308	acp6_c6_rnaAligned	0.63245	0.266846	0.670523	FALSE	AIFM2_minus	FALSE	FALSE	FALSE	FALSE
chr10	70112270	70132825	AIFM2	0	-	23	25	minus	48	-0.0208333	acp7_c1_rnaAligned	2.3352	0.885433	1	FALSE	AIFM2_minus	FALSE	FALSE	FALSE	FALSE
chr10	70112270	70132825	AIFM2	0	-	16	20	minus	36	-0.0555556	acp7_c2_rnaAligned	1.7514	0.617719	0.933614	FALSE	AIFM2_minus	FALSE	FALSE	FALSE	FALSE
chr10	70112270	70132825	AIFM2	0	-	19	17	minus	36	0.0277778	acp7_c4_rnaAligned	1.7514	0.867939	1	FALSE	AIFM2_minus	FALSE	FALSE	FALSE	FALSE
chr6	143059212	143343883	AIG1	0	+	3	7	plus	10	-0.2	acp6_c5_rnaAligned	0.0351283	0.34375	0.771025	FALSE	AIG1_plus	FALSE	FALSE	FALSE	FALSE
chr6	143059212	143343883	AIG1	0	+	97	88	plus	185	0.0243243	acp7_c1_rnaAligned	0.649873	0.556535	0.919277	FALSE	AIG1_plus	FALSE	FALSE	FALSE	FALSE
chr6	143059212	143343883	AIG1	0	+	77	103	plus	180	-0.0722222	acp7_c2_rnaAligned	0.632309	0.0621068	0.317195	FALSE	AIG1_plus	FALSE	FALSE	FALSE	FALSE
chr6	143059212	143343883	AIG1	0	+	80	54	plus	134	0.0970149	acp7_c4_rnaAligned	0.470719	0.0304148	0.206295	FALSE	AIG1_plus	FALSE	FALSE	FALSE	FALSE
chr4	106315543	106349456	AIMP1	0	+	1	12	plus	13	-0.423077	acp6_c1_rnaAligned	0.383334	0.00341797	0.0370088	TRUE	AIMP1_plus	TRUE	TRUE	TRUE	FALSE
chr4	106315543	106349456	AIMP1	0	+	5	13	plus	18	-0.222222	acp6_c2_rnaAligned	0.53077	0.0962524	0.377185	FALSE	AIMP1_plus	TRUE	FALSE	FALSE	FALSE
chr4	106315543	106349456	AIMP1	0	+	2	14	plus	16	-0.375	acp6_c5_rnaAligned	0.471795	0.00418091	0.0515887	FALSE	AIMP1_plus	TRUE	TRUE	FALSE	FALSE
chr4	106315543	106349456	AIMP1	0	+	4	21	plus	25	-0.34	acp6_c6_rnaAligned	0.73718	0.00091052	0.0145373	TRUE	AIMP1_plus	TRUE	TRUE	FALSE	FALSE
chr4	106315543	106349456	AIMP1	0	+	3	6	plus	9	-0.166667	acp7_c2_rnaAligned	0.265385	0.507812	0.872028	FALSE	AIMP1_plus	FALSE	FALSE	FALSE	FALSE
chr4	106315543	106349456	AIMP1	0	+	7	7	plus	14	0	acp7_c4_rnaAligned	0.412821	1	1	FALSE	AIMP1_plus	FALSE	FALSE	FALSE	FALSE
chr7	6009271	6023834	AIMP2	0	+	75	98	plus	173	-0.066474	acp6_c1_rnaAligned	11.8794	0.0941147	0.374828	FALSE	AIMP2_plus	FALSE	FALSE	FALSE	FALSE
chr7	6009271	6023834	AIMP2	0	+	118	132	plus	250	-0.028	acp6_c2_rnaAligned	17.1668	0.411019	0.794253	FALSE	AIMP2_plus	FALSE	FALSE	FALSE	FALSE
chr7	6009271	6023834	AIMP2	0	+	69	77	plus	146	-0.0273973	acp6_c5_rnaAligned	10.0254	0.562521	0.923139	FALSE	AIMP2_plus	FALSE	FALSE	FALSE	FALSE
chr7	6009271	6023834	AIMP2	0	+	50	63	plus	113	-0.0575221	acp6_c6_rnaAligned	7.75939	0.258862	0.667723	FALSE	AIMP2_plus	FALSE	FALSE	FALSE	FALSE
chr7	6009271	6023834	AIMP2	0	+	78	97	plus	175	-0.0542857	acp7_c1_rnaAligned	12.0168	0.173444	0.572932	FALSE	AIMP2_plus	FALSE	FALSE	FALSE	FALSE
chr7	6009271	6023834	AIMP2	0	+	40	54	plus	94	-0.0744681	acp7_c2_rnaAligned	6.45471	0.179665	0.542345	FALSE	AIMP2_plus	FALSE	FALSE	FALSE	FALSE
chr7	6009271	6023834	AIMP2	0	+	50	55	plus	105	-0.0238095	acp7_c4_rnaAligned	7.21005	0.696468	0.989835	FALSE	AIMP2_plus	FALSE	FALSE	FALSE	FALSE
chr11	67483025	67491103	AIP	0	+	5	3	plus	8	0.125	acp7_c1_rnaAligned	0.990344	0.726562	1	FALSE	AIP_plus	FALSE	FALSE	FALSE	FALSE
chr1	37681569	37692242	AIRIM	0	-	107	88	minus	195	0.048718	acp6_c1_rnaAligned	18.2704	0.19727	0.56289	FALSE	AIRIM_minus	FALSE	FALSE	FALSE	FALSE
chr1	37681569	37692242	AIRIM	0	-	84	82	minus	166	0.0060241	acp6_c2_rnaAligned	15.5533	0.938165	1	FALSE	AIRIM_minus	FALSE	FALSE	FALSE	FALSE
chr1	37681569	37692242	AIRIM	0	-	71	88	minus	159	-0.0534591	acp6_c5_rnaAligned	14.8974	0.20434	0.616248	FALSE	AIRIM_minus	FALSE	FALSE	FALSE	FALSE
chr1	37681569	37692242	AIRIM	0	-	129	105	minus	234	0.0512821	acp6_c6_rnaAligned	21.9245	0.132522	0.473615	FALSE	AIRIM_minus	FALSE	FALSE	FALSE	FALSE
chr1	4654608	4792534	AJAP1	0	+	5	7	plus	12	-0.0833333	acp6_c1_rnaAligned	0.0870032	0.774414	1	FALSE	AJAP1_plus	FALSE	FALSE	FALSE	FALSE
chr1	4654608	4792534	AJAP1	0	+	3	14	plus	17	-0.323529	acp6_c2_rnaAligned	0.123255	0.0127258	0.099403	FALSE	AJAP1_plus	TRUE	TRUE	FALSE	FALSE
chr1	4654608	4792534	AJAP1	0	+	47	27	plus	74	0.135135	acp6_c5_rnaAligned	0.53652	0.0265168	0.191098	FALSE	AJAP1_plus	FALSE	FALSE	FALSE	FALSE
chr1	4654608	4792534	AJAP1	0	+	35	52	plus	87	-0.0977011	acp6_c6_rnaAligned	0.630773	0.085689	0.375179	FALSE	AJAP1_plus	FALSE	FALSE	FALSE	FALSE
chr14	22971176	22982551	AJUBA	0	-	24	18	minus	42	0.0714286	acp6_c1_rnaAligned	3.69231	0.440799	0.811417	FALSE	AJUBA_minus	FALSE	FALSE	FALSE	FALSE
chr14	22971176	22982551	AJUBA	0	-	18	27	minus	45	-0.1	acp6_c2_rnaAligned	3.95604	0.232693	0.60432	FALSE	AJUBA_minus	FALSE	FALSE	FALSE	FALSE
chr14	22971176	22982551	AJUBA	0	-	22	10	minus	32	0.1875	acp6_c5_rnaAligned	2.81319	0.0501025	0.286934	FALSE	AJUBA_minus	FALSE	FALSE	FALSE	FALSE
chr14	22971176	22982551	AJUBA	0	-	11	21	minus	32	-0.15625	acp6_c6_rnaAligned	2.81319	0.110184	0.42599	FALSE	AJUBA_minus	FALSE	FALSE	FALSE	FALSE
chr14	22971176	22982551	AJUBA	0	-	167	146	minus	313	0.0335463	acp7_c1_rnaAligned	27.5165	0.258245	0.690401	FALSE	AJUBA_minus	FALSE	FALSE	FALSE	FALSE
chr14	22971176	22982551	AJUBA	0	-	137	112	minus	249	0.0502008	acp7_c2_rnaAligned	21.8901	0.128108	0.468821	FALSE	AJUBA_minus	FALSE	FALSE	FALSE	FALSE
chr14	22971176	22982551	AJUBA	0	-	96	99	minus	195	-0.0076923	acp7_c4_rnaAligned	17.1429	0.886162	1	FALSE	AJUBA_minus	FALSE	FALSE	FALSE	FALSE
chr9	127866479	127879621	AK1	0	-	12	8	minus	20	0.1	acp6_c2_rnaAligned	1.52184	0.503445	0.868759	FALSE	AK1_minus	FALSE	FALSE	FALSE	FALSE
chr9	127866479	127879621	AK1	0	-	6	9	minus	15	-0.1	acp6_c5_rnaAligned	1.14138	0.607239	0.940294	FALSE	AK1_minus	FALSE	FALSE	FALSE	FALSE
chr9	127866479	127879621	AK1	0	-	10	9	minus	19	0.0263158	acp6_c6_rnaAligned	1.44575	1	1	FALSE	AK1_minus	FALSE	FALSE	FALSE	FALSE
chr1	33007939	33036883	AK2	0	-	1023	14	minus	1037	0.4865	acp6_c1_rnaAligned	35.8278	2.4e-281	1.93e-278	TRUE	AK2_minus	TRUE	TRUE	TRUE	TRUE
chr1	33007939	33036883	AK2	0	-	863	17	minus	880	0.480682	acp6_c2_rnaAligned	30.4035	6.93e-230	9.41e-227	TRUE	AK2_minus	TRUE	TRUE	TRUE	TRUE
chr1	33007939	33036883	AK2	0	-	910	4	minus	914	0.495624	acp6_c5_rnaAligned	31.5782	4.19e-265	5.46e-262	TRUE	AK2_minus	TRUE	TRUE	TRUE	TRUE
chr1	33007939	33036883	AK2	0	-	801	7	minus	808	0.491337	acp6_c6_rnaAligned	27.916	5.14e-227	6.06e-224	TRUE	AK2_minus	TRUE	TRUE	TRUE	TRUE
chr1	33007939	33036883	AK2	0	-	235	3334	minus	3569	-0.434155	acp7_c1_rnaAligned	123.307	0	0	TRUE	AK2_minus	TRUE	TRUE	TRUE	FALSE
chr1	33007939	33036883	AK2	0	-	137	2129	minus	2266	-0.439541	acp7_c2_rnaAligned	78.2891	0	0	TRUE	AK2_minus	TRUE	TRUE	TRUE	FALSE
chr1	33007939	33036883	AK2	0	-	187	2625	minus	2812	-0.433499	acp7_c4_rnaAligned	97.1531	0	0	TRUE	AK2_minus	TRUE	TRUE	TRUE	FALSE
chr9	4709555	4742043	AK3	0	-	85	63	minus	148	0.0743243	acp6_c1_rnaAligned	4.55553	0.0839666	0.351463	FALSE	AK3_minus	FALSE	FALSE	FALSE	FALSE
chr9	4709555	4742043	AK3	0	-	131	82	minus	213	0.115023	acp6_c2_rnaAligned	6.55627	0.00096076	0.0135342	TRUE	AK3_minus	FALSE	FALSE	FALSE	FALSE
chr9	4709555	4742043	AK3	0	-	80	52	minus	132	0.106061	acp6_c5_rnaAligned	4.06304	0.0184306	0.151611	FALSE	AK3_minus	FALSE	FALSE	FALSE	FALSE
chr9	4709555	4742043	AK3	0	-	141	65	minus	206	0.184466	acp6_c6_rnaAligned	6.3408	1.26e-07	4.56e-06	TRUE	AK3_minus	FALSE	FALSE	FALSE	FALSE
chr9	4709555	4742043	AK3	0	-	495	530	minus	1025	-0.0170732	acp7_c1_rnaAligned	31.5501	0.288239	0.714066	FALSE	AK3_minus	FALSE	FALSE	FALSE	FALSE
chr9	4709555	4742043	AK3	0	-	417	417	minus	834	0	acp7_c2_rnaAligned	25.671	1	1	FALSE	AK3_minus	FALSE	FALSE	FALSE	FALSE
chr9	4709555	4742043	AK3	0	-	416	418	minus	834	-0.001199	acp7_c4_rnaAligned	25.671	0.97238	1	FALSE	AK3_minus	FALSE	FALSE	FALSE	FALSE
chr1	77282018	77559966	AK5	0	+	235	145	plus	380	0.118421	acp6_c1_rnaAligned	1.36716	4.52e-06	0.00011191	TRUE	AK5_plus	FALSE	FALSE	FALSE	FALSE
chr1	77282018	77559966	AK5	0	+	204	146	plus	350	0.0828571	acp6_c2_rnaAligned	1.25923	0.00226684	0.0277296	TRUE	AK5_plus	FALSE	FALSE	FALSE	FALSE
chr1	77282018	77559966	AK5	0	+	284	212	plus	496	0.0725806	acp6_c5_rnaAligned	1.78451	0.00140833	0.0215183	TRUE	AK5_plus	FALSE	FALSE	FALSE	FALSE
chr1	77282018	77559966	AK5	0	+	378	236	plus	614	0.115635	acp6_c6_rnaAligned	2.20905	1.1e-08	4.46e-07	TRUE	AK5_plus	FALSE	FALSE	FALSE	FALSE
chr1	77282018	77559966	AK5	0	+	50	39	plus	89	0.0617977	acp7_c1_rnaAligned	0.320204	0.289096	0.714066	FALSE	AK5_plus	FALSE	FALSE	FALSE	FALSE
chr1	77282018	77559966	AK5	0	+	87	76	plus	163	0.0337423	acp7_c2_rnaAligned	0.586441	0.433567	0.817356	FALSE	AK5_plus	FALSE	FALSE	FALSE	FALSE
chr1	77282018	77559966	AK5	0	+	54	51	plus	105	0.0142857	acp7_c4_rnaAligned	0.377769	0.84537	1	FALSE	AK5_plus	FALSE	FALSE	FALSE	FALSE
chr9	132725577	132879046	AK8	0	-	13	7	minus	20	0.15	acp6_c6_rnaAligned	0.130319	0.263176	0.670523	FALSE	AK8_minus	FALSE	FALSE	FALSE	FALSE
chr6	109492854	109691202	AK9	0	-	30	62	minus	92	-0.173913	acp6_c1_rnaAligned	0.463831	0.00111093	0.0146036	TRUE	AK9_minus	FALSE	FALSE	FALSE	FALSE
chr6	109492854	109691202	AK9	0	-	77	98	minus	175	-0.06	acp6_c2_rnaAligned	0.882288	0.130335	0.445202	FALSE	AK9_minus	FALSE	FALSE	FALSE	FALSE
chr6	109492854	109691202	AK9	0	-	37	54	minus	91	-0.0934066	acp6_c5_rnaAligned	0.45879	0.0929469	0.402114	FALSE	AK9_minus	FALSE	FALSE	FALSE	FALSE
chr6	109492854	109691202	AK9	0	-	38	52	minus	90	-0.0777778	acp6_c6_rnaAligned	0.453748	0.170242	0.539683	FALSE	AK9_minus	FALSE	FALSE	FALSE	FALSE
chr6	109492854	109691202	AK9	0	-	33	41	minus	74	-0.0540541	acp7_c1_rnaAligned	0.373082	0.415985	0.832467	FALSE	AK9_minus	FALSE	FALSE	FALSE	FALSE
chr6	109492854	109691202	AK9	0	-	38	34	minus	72	0.0277778	acp7_c2_rnaAligned	0.362998	0.723948	0.987911	FALSE	AK9_minus	FALSE	FALSE	FALSE	FALSE
chr6	109492854	109691202	AK9	0	-	23	24	minus	47	-0.0106383	acp7_c4_rnaAligned	0.236957	1	1	FALSE	AK9_minus	FALSE	FALSE	FALSE	FALSE
chr17	57085245	57121344	AKAP1	0	+	33	26	plus	59	0.059322	acp7_c1_rnaAligned	1.63439	0.434993	0.846566	FALSE	AKAP1_plus	FALSE	FALSE	FALSE	FALSE
chr17	57085245	57121344	AKAP1	0	+	17	18	plus	35	-0.0142857	acp7_c2_rnaAligned	0.969556	1	1	FALSE	AKAP1_plus	FALSE	FALSE	FALSE	FALSE
chr17	57085245	57121344	AKAP1	0	+	19	36	plus	55	-0.154546	acp7_c4_rnaAligned	1.52359	0.0300289	0.204202	FALSE	AKAP1_plus	FALSE	FALSE	FALSE	FALSE
chr17	19904301	19977828	AKAP10	0	-	10	9	minus	19	0.0263158	acp6_c1_rnaAligned	0.258408	1	1	FALSE	AKAP10_minus	FALSE	FALSE	FALSE	FALSE
chr17	19904301	19977828	AKAP10	0	-	11	6	minus	17	0.147059	acp6_c2_rnaAligned	0.231208	0.332306	0.724845	FALSE	AKAP10_minus	FALSE	FALSE	FALSE	FALSE
chr17	19904301	19977828	AKAP10	0	-	8	8	minus	16	0	acp6_c5_rnaAligned	0.217607	1	1	FALSE	AKAP10_minus	FALSE	FALSE	FALSE	FALSE
chr17	19904301	19977828	AKAP10	0	-	8	15	minus	23	-0.152174	acp6_c6_rnaAligned	0.31281	0.21004	0.603031	FALSE	AKAP10_minus	FALSE	FALSE	FALSE	FALSE
chr17	19904301	19977828	AKAP10	0	-	9	8	minus	17	0.0294118	acp7_c1_rnaAligned	0.231208	1	1	FALSE	AKAP10_minus	FALSE	FALSE	FALSE	FALSE
chr17	19904301	19977828	AKAP10	0	-	12	8	minus	20	0.1	acp7_c2_rnaAligned	0.272009	0.503445	0.872028	FALSE	AKAP10_minus	FALSE	FALSE	FALSE	FALSE
chr17	19904301	19977828	AKAP10	0	-	8	7	minus	15	0.0333333	acp7_c4_rnaAligned	0.204007	1	1	FALSE	AKAP10_minus	FALSE	FALSE	FALSE	FALSE
chr13	42271476	42323261	AKAP11	0	+	153	163	plus	316	-0.0158228	acp6_c1_rnaAligned	6.10215	0.612724	0.922065	FALSE	AKAP11_plus	FALSE	FALSE	FALSE	FALSE
chr13	42271476	42323261	AKAP11	0	+	171	154	plus	325	0.0261538	acp6_c2_rnaAligned	6.27595	0.374825	0.765033	FALSE	AKAP11_plus	FALSE	FALSE	FALSE	FALSE
chr13	42271476	42323261	AKAP11	0	+	124	107	plus	231	0.0367965	acp6_c5_rnaAligned	4.46075	0.29245	0.72126	FALSE	AKAP11_plus	FALSE	FALSE	FALSE	FALSE
chr13	42271476	42323261	AKAP11	0	+	132	147	plus	279	-0.0268817	acp6_c6_rnaAligned	5.38766	0.401984	0.797326	FALSE	AKAP11_plus	FALSE	FALSE	FALSE	FALSE
chr13	42271476	42323261	AKAP11	0	+	28	34	plus	62	-0.0483871	acp7_c1_rnaAligned	1.19726	0.525773	0.901509	FALSE	AKAP11_plus	FALSE	FALSE	FALSE	FALSE
chr13	42271476	42323261	AKAP11	0	+	19	20	plus	39	-0.0128205	acp7_c2_rnaAligned	0.753114	1	1	FALSE	AKAP11_plus	FALSE	FALSE	FALSE	FALSE
chr13	42271476	42323261	AKAP11	0	+	25	22	plus	47	0.0319149	acp7_c4_rnaAligned	0.907599	0.770867	1	FALSE	AKAP11_plus	FALSE	FALSE	FALSE	FALSE
chr6	151239966	151358559	AKAP12	0	+	1274	1480	plus	2754	-0.0374001	acp6_c1_rnaAligned	23.2223	9.3e-05	0.00170126	TRUE	AKAP12_plus	FALSE	FALSE	FALSE	FALSE
chr6	151239966	151358559	AKAP12	0	+	5194	3103	plus	8297	0.126009	acp6_c2_rnaAligned	69.962	9.52e-118	6.46e-115	TRUE	AKAP12_plus	FALSE	FALSE	FALSE	FALSE
chr6	151239966	151358559	AKAP12	0	+	2864	1961	plus	4825	0.0935751	acp6_c5_rnaAligned	40.6854	8.99e-39	1.64e-36	TRUE	AKAP12_plus	FALSE	FALSE	FALSE	FALSE
chr6	151239966	151358559	AKAP12	0	+	3706	2657	plus	6363	0.0824297	acp6_c6_rnaAligned	53.6541	1.34e-39	2.36e-37	TRUE	AKAP12_plus	FALSE	FALSE	FALSE	FALSE
chr6	151239966	151358559	AKAP12	0	+	1603	1749	plus	3352	-0.021778	acp7_c1_rnaAligned	28.2647	0.0122521	0.113171	FALSE	AKAP12_plus	FALSE	FALSE	FALSE	FALSE
chr6	151239966	151358559	AKAP12	0	+	2095	2268	plus	4363	-0.0198258	acp7_c2_rnaAligned	36.7897	0.00920737	0.0863351	FALSE	AKAP12_plus	FALSE	FALSE	FALSE	FALSE
chr6	151239966	151358559	AKAP12	0	+	1567	1215	plus	2782	0.0632638	acp7_c4_rnaAligned	23.4584	2.68e-11	1.61e-09	TRUE	AKAP12_plus	FALSE	FALSE	FALSE	FALSE
chr15	85380602	85749358	AKAP13	0	+	197	210	plus	407	-0.0159705	acp6_c1_rnaAligned	1.10371	0.552018	0.887687	FALSE	AKAP13_plus	FALSE	FALSE	FALSE	FALSE
chr15	85380602	85749358	AKAP13	0	+	226	237	plus	463	-0.011879	acp6_c2_rnaAligned	1.25557	0.642165	0.947775	FALSE	AKAP13_plus	FALSE	FALSE	FALSE	FALSE
chr15	85380602	85749358	AKAP13	0	+	157	178	plus	335	-0.0313433	acp6_c5_rnaAligned	0.90846	0.274495	0.702676	FALSE	AKAP13_plus	FALSE	FALSE	FALSE	FALSE
chr15	85380602	85749358	AKAP13	0	+	237	220	plus	457	0.0185996	acp6_c6_rnaAligned	1.2393	0.454226	0.835945	FALSE	AKAP13_plus	FALSE	FALSE	FALSE	FALSE
chr15	85380602	85749358	AKAP13	0	+	1309	1282	plus	2591	0.00521034	acp7_c1_rnaAligned	7.02633	0.609509	0.945581	FALSE	AKAP13_plus	FALSE	FALSE	FALSE	FALSE
chr15	85380602	85749358	AKAP13	0	+	1007	1077	plus	2084	-0.0167946	acp7_c2_rnaAligned	5.65143	0.130648	0.474898	FALSE	AKAP13_plus	FALSE	FALSE	FALSE	FALSE
chr15	85380602	85749358	AKAP13	0	+	845	778	plus	1623	0.0206408	acp7_c4_rnaAligned	4.40128	0.101336	0.425261	FALSE	AKAP13_plus	FALSE	FALSE	FALSE	FALSE
chr12	4615517	4649051	AKAP3	0	-	14	20	minus	34	-0.0882353	acp6_c1_rnaAligned	1.0139	0.391528	0.769904	FALSE	AKAP3_minus	FALSE	FALSE	FALSE	FALSE
chr12	4615517	4649051	AKAP3	0	-	14	36	minus	50	-0.22	acp6_c2_rnaAligned	1.49102	0.00260217	0.0305034	TRUE	AKAP3_minus	TRUE	FALSE	FALSE	FALSE
chr12	4615517	4649051	AKAP3	0	-	10	9	minus	19	0.0263158	acp6_c5_rnaAligned	0.566589	1	1	FALSE	AKAP3_minus	FALSE	FALSE	FALSE	FALSE
chr12	4615517	4649051	AKAP3	0	-	8	13	minus	21	-0.119048	acp6_c6_rnaAligned	0.62623	0.38331	0.782726	FALSE	AKAP3_minus	FALSE	FALSE	FALSE	FALSE
chr12	4615517	4649051	AKAP3	0	-	2	11	minus	13	-0.346154	acp7_c1_rnaAligned	0.387666	0.0224609	0.17201	FALSE	AKAP3_minus	TRUE	TRUE	FALSE	FALSE
chr12	4615517	4649051	AKAP3	0	-	1	9	minus	10	-0.4	acp7_c4_rnaAligned	0.298205	0.0214844	0.16364	FALSE	AKAP3_minus	TRUE	TRUE	TRUE	FALSE
chr14	32329297	32837684	AKAP6	0	+	10	20	plus	30	-0.166667	acp6_c1_rnaAligned	0.0590102	0.0987371	0.384262	FALSE	AKAP6_plus	FALSE	FALSE	FALSE	FALSE
chr14	32329297	32837684	AKAP6	0	+	8	14	plus	22	-0.136364	acp6_c2_rnaAligned	0.0432741	0.286279	0.674462	FALSE	AKAP6_plus	FALSE	FALSE	FALSE	FALSE
chr14	32329297	32837684	AKAP6	0	+	22	22	plus	44	0	acp6_c5_rnaAligned	0.0865482	1	1	FALSE	AKAP6_plus	FALSE	FALSE	FALSE	FALSE
chr14	32329297	32837684	AKAP6	0	+	27	16	plus	43	0.127907	acp6_c6_rnaAligned	0.0845812	0.126289	0.459339	FALSE	AKAP6_plus	FALSE	FALSE	FALSE	FALSE
chr14	32329297	32837684	AKAP6	0	+	93	88	plus	181	0.0138122	acp7_c1_rnaAligned	0.356028	0.76632	1	FALSE	AKAP6_plus	FALSE	FALSE	FALSE	FALSE
chr14	32329297	32837684	AKAP6	0	+	72	161	plus	233	-0.190987	acp7_c2_rnaAligned	0.458312	5.37e-09	2.47e-07	TRUE	AKAP6_plus	FALSE	FALSE	FALSE	FALSE
chr14	32329297	32837684	AKAP6	0	+	30	85	plus	115	-0.23913	acp7_c4_rnaAligned	0.226206	2.86e-07	1.09e-05	TRUE	AKAP6_plus	TRUE	FALSE	FALSE	FALSE
chr6	131125626	131283532	AKAP7	0	+	17	12	plus	29	0.0862069	acp6_c1_rnaAligned	0.183654	0.458258	0.820723	FALSE	AKAP7_plus	FALSE	FALSE	FALSE	FALSE
chr6	131125626	131283532	AKAP7	0	+	19	26	plus	45	-0.0777778	acp6_c2_rnaAligned	0.28498	0.371298	0.761381	FALSE	AKAP7_plus	FALSE	FALSE	FALSE	FALSE
chr6	131125626	131283532	AKAP7	0	+	10	17	plus	27	-0.12963	acp6_c5_rnaAligned	0.170988	0.247789	0.670867	FALSE	AKAP7_plus	FALSE	FALSE	FALSE	FALSE
chr6	131125626	131283532	AKAP7	0	+	26	26	plus	52	0	acp6_c6_rnaAligned	0.32931	1	1	FALSE	AKAP7_plus	FALSE	FALSE	FALSE	FALSE
chr6	131125626	131283532	AKAP7	0	+	11	17	plus	28	-0.107143	acp7_c1_rnaAligned	0.177321	0.344928	0.76992	FALSE	AKAP7_plus	FALSE	FALSE	FALSE	FALSE
chr6	131125626	131283532	AKAP7	0	+	13	9	plus	22	0.0909091	acp7_c2_rnaAligned	0.139323	0.523467	0.881887	FALSE	AKAP7_plus	FALSE	FALSE	FALSE	FALSE
chr6	131125626	131283532	AKAP7	0	+	13	25	plus	38	-0.157895	acp7_c4_rnaAligned	0.240649	0.0729514	0.350329	FALSE	AKAP7_plus	FALSE	FALSE	FALSE	FALSE
chr19	15353384	15379787	AKAP8	0	-	36	37	minus	73	-0.0068493	acp6_c1_rnaAligned	2.76484	1	1	FALSE	AKAP8_minus	FALSE	FALSE	FALSE	FALSE
chr19	15353384	15379787	AKAP8	0	-	33	36	minus	69	-0.0217391	acp6_c2_rnaAligned	2.61334	0.809949	1	FALSE	AKAP8_minus	FALSE	FALSE	FALSE	FALSE
chr19	15353384	15379787	AKAP8	0	-	28	22	minus	50	0.06	acp6_c5_rnaAligned	1.89372	0.479888	0.869653	FALSE	AKAP8_minus	FALSE	FALSE	FALSE	FALSE
chr19	15353384	15379787	AKAP8	0	-	36	45	minus	81	-0.0555556	acp6_c6_rnaAligned	3.06783	0.374174	0.774317	FALSE	AKAP8_minus	FALSE	FALSE	FALSE	FALSE
chr19	15353384	15379787	AKAP8	0	-	9	2	minus	11	0.318182	acp7_c2_rnaAligned	0.416619	0.0654297	0.322572	FALSE	AKAP8_minus	TRUE	TRUE	FALSE	FALSE
chr19	15380049	15418988	AKAP8L	0	-	17	29	minus	46	-0.130435	acp6_c1_rnaAligned	1.18133	0.103805	0.397484	FALSE	AKAP8L_minus	FALSE	FALSE	FALSE	FALSE
chr19	15380049	15418988	AKAP8L	0	-	18	29	minus	47	-0.117021	acp6_c2_rnaAligned	1.20702	0.143865	0.473575	FALSE	AKAP8L_minus	FALSE	FALSE	FALSE	FALSE
chr19	15380049	15418988	AKAP8L	0	-	15	19	minus	34	-0.0588235	acp6_c5_rnaAligned	0.873161	0.607591	0.940294	FALSE	AKAP8L_minus	FALSE	FALSE	FALSE	FALSE
chr19	15380049	15418988	AKAP8L	0	-	19	24	minus	43	-0.0581395	acp6_c6_rnaAligned	1.10429	0.542384	0.89401	FALSE	AKAP8L_minus	FALSE	FALSE	FALSE	FALSE
chr19	15380049	15418988	AKAP8L	0	-	17	12	minus	29	0.0862069	acp7_c1_rnaAligned	0.744755	0.458258	0.860921	FALSE	AKAP8L_minus	FALSE	FALSE	FALSE	FALSE
chr19	15380049	15418988	AKAP8L	0	-	4	14	minus	18	-0.277778	acp7_c2_rnaAligned	0.462261	0.0308838	0.201292	FALSE	AKAP8L_minus	TRUE	FALSE	FALSE	FALSE
chr19	15380049	15418988	AKAP8L	0	-	11	12	minus	23	-0.0217391	acp7_c4_rnaAligned	0.590667	1	1	FALSE	AKAP8L_minus	FALSE	FALSE	FALSE	FALSE
chr7	91940861	92110673	AKAP9	0	+	14	6	plus	20	0.2	acp6_c1_rnaAligned	0.117777	0.115318	0.417899	FALSE	AKAP9_plus	FALSE	FALSE	FALSE	FALSE
chr7	91940861	92110673	AKAP9	0	+	7	5	plus	12	0.0833333	acp6_c5_rnaAligned	0.0706664	0.774414	1	FALSE	AKAP9_plus	FALSE	FALSE	FALSE	FALSE
chr7	91940861	92110673	AKAP9	0	+	14	5	plus	19	0.236842	acp6_c6_rnaAligned	0.111888	0.0635681	0.316767	FALSE	AKAP9_plus	TRUE	FALSE	FALSE	FALSE
chr7	91940861	92110673	AKAP9	0	+	126	115	plus	241	0.0228216	acp7_c1_rnaAligned	1.41922	0.519559	0.900487	FALSE	AKAP9_plus	FALSE	FALSE	FALSE	FALSE
chr7	91940861	92110673	AKAP9	0	+	94	101	plus	195	-0.0179487	acp7_c2_rnaAligned	1.14833	0.667546	0.962592	FALSE	AKAP9_plus	FALSE	FALSE	FALSE	FALSE
chr7	91940861	92110673	AKAP9	0	+	105	91	plus	196	0.0357143	acp7_c4_rnaAligned	1.15422	0.353141	0.762127	FALSE	AKAP9_plus	FALSE	FALSE	FALSE	FALSE
chr11	8911188	8920079	AKIP1	0	+	117	110	plus	227	0.0154185	acp6_c1_rnaAligned	25.5314	0.690549	0.966143	FALSE	AKIP1_plus	FALSE	FALSE	FALSE	FALSE
chr11	8911188	8920079	AKIP1	0	+	80	86	plus	166	-0.0180723	acp6_c2_rnaAligned	18.6706	0.698084	0.977198	FALSE	AKIP1_plus	FALSE	FALSE	FALSE	FALSE
chr11	8911188	8920079	AKIP1	0	+	58	76	plus	134	-0.0671642	acp6_c5_rnaAligned	15.0714	0.141662	0.510465	FALSE	AKIP1_plus	FALSE	FALSE	FALSE	FALSE
chr11	8911188	8920079	AKIP1	0	+	96	130	plus	226	-0.0752212	acp6_c6_rnaAligned	25.419	0.0279321	0.183738	FALSE	AKIP1_plus	FALSE	FALSE	FALSE	FALSE
chr11	8911188	8920079	AKIP1	0	+	72	92	plus	164	-0.0609756	acp7_c1_rnaAligned	18.4456	0.137662	0.514491	FALSE	AKIP1_plus	FALSE	FALSE	FALSE	FALSE
chr11	8911188	8920079	AKIP1	0	+	51	63	plus	114	-0.0526316	acp7_c2_rnaAligned	12.822	0.302878	0.69129	FALSE	AKIP1_plus	FALSE	FALSE	FALSE	FALSE
chr11	8911188	8920079	AKIP1	0	+	51	69	plus	120	-0.075	acp7_c4_rnaAligned	13.4968	0.120328	0.462248	FALSE	AKIP1_plus	FALSE	FALSE	FALSE	FALSE
chr1	38991275	39006059	AKIRIN1	0	+	261	235	plus	496	0.0262097	acp7_c1_rnaAligned	33.5498	0.261615	0.694361	FALSE	AKIRIN1_plus	FALSE	FALSE	FALSE	FALSE
chr1	38991275	39006059	AKIRIN1	0	+	160	158	plus	318	0.00314465	acp7_c2_rnaAligned	21.5097	0.955292	1	FALSE	AKIRIN1_plus	FALSE	FALSE	FALSE	FALSE
chr1	38991275	39006059	AKIRIN1	0	+	169	156	plus	325	0.02	acp7_c4_rnaAligned	21.9832	0.505702	0.880867	FALSE	AKIRIN1_plus	FALSE	FALSE	FALSE	FALSE
chr6	87674859	87702233	AKIRIN2	0	-	13	11	minus	24	0.0416667	acp7_c1_rnaAligned	0.876744	0.83882	1	FALSE	AKIRIN2_minus	FALSE	FALSE	FALSE	FALSE
chr6	87674859	87702233	AKIRIN2	0	-	17	25	minus	42	-0.0952381	acp7_c2_rnaAligned	1.5343	0.279956	0.67669	FALSE	AKIRIN2_minus	FALSE	FALSE	FALSE	FALSE
chr6	87674859	87702233	AKIRIN2	0	-	2	8	minus	10	-0.3	acp7_c4_rnaAligned	0.36531	0.109375	0.439997	FALSE	AKIRIN2_minus	TRUE	TRUE	FALSE	FALSE
chr9	114334155	114398472	AKNA	0	-	28	35	minus	63	-0.0555556	acp6_c1_rnaAligned	0.979523	0.449963	0.818911	FALSE	AKNA_minus	FALSE	FALSE	FALSE	FALSE
chr9	114334155	114398472	AKNA	0	-	91	74	minus	165	0.0515152	acp6_c2_rnaAligned	2.56542	0.212786	0.580176	FALSE	AKNA_minus	FALSE	FALSE	FALSE	FALSE
chr9	114334155	114398472	AKNA	0	-	21	28	minus	49	-0.0714286	acp6_c5_rnaAligned	0.761851	0.391603	0.803649	FALSE	AKNA_minus	FALSE	FALSE	FALSE	FALSE
chr9	114334155	114398472	AKNA	0	-	76	107	minus	183	-0.0846995	acp6_c6_rnaAligned	2.84528	0.0263067	0.176131	FALSE	AKNA_minus	FALSE	FALSE	FALSE	FALSE
chr1	108815900	108857094	AKNAD1	0	-	10	6	minus	16	0.125	acp6_c1_rnaAligned	0.388406	0.454498	0.818911	FALSE	AKNAD1_minus	FALSE	FALSE	FALSE	FALSE
chr7	134442349	134459239	AKR1B1	0	-	16	18	minus	34	-0.0294118	acp6_c1_rnaAligned	2.01303	0.864166	1	FALSE	AKR1B1_minus	FALSE	FALSE	FALSE	FALSE
chr7	134442349	134459239	AKR1B1	0	-	17	14	minus	31	0.0483871	acp6_c2_rnaAligned	1.83541	0.7201	0.989153	FALSE	AKR1B1_minus	FALSE	FALSE	FALSE	FALSE
chr7	134442349	134459239	AKR1B1	0	-	11	15	minus	26	-0.0769231	acp6_c5_rnaAligned	1.53937	0.557197	0.91961	FALSE	AKR1B1_minus	FALSE	FALSE	FALSE	FALSE
chr7	134442349	134459239	AKR1B1	0	-	13	14	minus	27	-0.0185185	acp6_c6_rnaAligned	1.59858	1	1	FALSE	AKR1B1_minus	FALSE	FALSE	FALSE	FALSE
chr7	134442349	134459239	AKR1B1	0	-	59	68	minus	127	-0.0354331	acp7_c1_rnaAligned	7.51924	0.477922	0.877615	FALSE	AKR1B1_minus	FALSE	FALSE	FALSE	FALSE
chr7	134442349	134459239	AKR1B1	0	-	35	43	minus	78	-0.0512821	acp7_c2_rnaAligned	4.61812	0.428207	0.81046	FALSE	AKR1B1_minus	FALSE	FALSE	FALSE	FALSE
chr7	134442349	134459239	AKR1B1	0	-	76	61	minus	137	0.0547445	acp7_c4_rnaAligned	8.11131	0.231537	0.635761	FALSE	AKR1B1_minus	FALSE	FALSE	FALSE	FALSE
chr10	4963414	4983283	AKR1C1	0	+	86	58	plus	144	0.0972222	acp6_c1_rnaAligned	7.24747	0.0241114	0.154738	FALSE	AKR1C1_plus	FALSE	FALSE	FALSE	FALSE
chr10	4963414	4983283	AKR1C1	0	+	170	81	plus	251	0.177291	acp6_c2_rnaAligned	12.6327	2e-08	8.02e-07	TRUE	AKR1C1_plus	FALSE	FALSE	FALSE	FALSE
chr10	4963414	4983283	AKR1C1	0	+	63	43	plus	106	0.0943396	acp6_c5_rnaAligned	5.33494	0.0644636	0.329386	FALSE	AKR1C1_plus	FALSE	FALSE	FALSE	FALSE
chr10	4963414	4983283	AKR1C1	0	+	183	101	plus	284	0.144366	acp6_c6_rnaAligned	14.2936	1.31e-06	4.06e-05	TRUE	AKR1C1_plus	FALSE	FALSE	FALSE	FALSE
chr10	4987774	5018000	AKR1C2	0	-	17	2	minus	19	0.394737	acp6_c1_rnaAligned	0.628598	0.00072861	0.0100028	TRUE	AKR1C2_minus	TRUE	TRUE	FALSE	FALSE
chr10	4987774	5018000	AKR1C2	0	-	12	13	minus	25	-0.02	acp6_c2_rnaAligned	0.827102	1	1	FALSE	AKR1C2_minus	FALSE	FALSE	FALSE	FALSE
chr10	4987774	5018000	AKR1C2	0	-	33	10	minus	43	0.267442	acp6_c5_rnaAligned	1.42262	0.00060611	0.0109759	TRUE	AKR1C2_minus	TRUE	FALSE	FALSE	FALSE
chr10	4987774	5018000	AKR1C2	0	-	49	35	minus	84	0.0833333	acp6_c6_rnaAligned	2.77906	0.155656	0.511956	FALSE	AKR1C2_minus	FALSE	FALSE	FALSE	FALSE
chr10	4987774	5018000	AKR1C2	0	-	9	5	minus	14	0.142857	acp7_c1_rnaAligned	0.463177	0.42395	0.836713	FALSE	AKR1C2_minus	FALSE	FALSE	FALSE	FALSE
chr10	4987774	5018000	AKR1C2	0	-	6	5	minus	11	0.0454546	acp7_c2_rnaAligned	0.363925	1	1	FALSE	AKR1C2_minus	FALSE	FALSE	FALSE	FALSE
chr10	4987774	5018000	AKR1C2	0	-	6	11	minus	17	-0.147059	acp7_c4_rnaAligned	0.56243	0.332306	0.741168	FALSE	AKR1C2_minus	FALSE	FALSE	FALSE	FALSE
chr10	5048780	5107686	AKR1C3	0	+	5	17	plus	22	-0.272727	acp6_c1_rnaAligned	0.373476	0.0169005	0.121289	FALSE	AKR1C3_plus	TRUE	FALSE	FALSE	FALSE
chr10	5048780	5107686	AKR1C3	0	+	69	40	plus	109	0.133028	acp6_c2_rnaAligned	1.85041	0.00704075	0.0654059	FALSE	AKR1C3_plus	FALSE	FALSE	FALSE	FALSE
chr10	5048780	5107686	AKR1C3	0	+	35	9	plus	44	0.295455	acp6_c5_rnaAligned	0.746953	0.00010604	0.00265893	TRUE	AKR1C3_plus	TRUE	FALSE	FALSE	FALSE
chr10	5048780	5107686	AKR1C3	0	+	17	16	plus	33	0.0151515	acp6_c6_rnaAligned	0.560215	1	1	FALSE	AKR1C3_plus	FALSE	FALSE	FALSE	FALSE
chr10	4824972	4854429	AKR1E2	0	+	9	39	plus	48	-0.3125	acp6_c1_rnaAligned	1.62949	1.52e-05	0.00034005	TRUE	AKR1E2_plus	TRUE	TRUE	FALSE	FALSE
chr10	4824972	4854429	AKR1E2	0	+	9	45	plus	54	-0.333333	acp6_c2_rnaAligned	1.83318	7.29e-07	2.16e-05	TRUE	AKR1E2_plus	TRUE	TRUE	FALSE	FALSE
chr10	4824972	4854429	AKR1E2	0	+	14	34	plus	48	-0.208333	acp6_c5_rnaAligned	1.62949	0.0055152	0.0643785	FALSE	AKR1E2_plus	TRUE	FALSE	FALSE	FALSE
chr10	4824972	4854429	AKR1E2	0	+	21	27	plus	48	-0.0625	acp6_c6_rnaAligned	1.62949	0.470879	0.847582	FALSE	AKR1E2_plus	FALSE	FALSE	FALSE	FALSE
chr10	4824972	4854429	AKR1E2	0	+	12	14	plus	26	-0.0384615	acp7_c1_rnaAligned	0.882642	0.845019	1	FALSE	AKR1E2_plus	FALSE	FALSE	FALSE	FALSE
chr10	4824972	4854429	AKR1E2	0	+	51	8	plus	59	0.364407	acp7_c2_rnaAligned	2.00292	9.05e-09	4.05e-07	TRUE	AKR1E2_plus	TRUE	TRUE	FALSE	FALSE
chr10	4824972	4854429	AKR1E2	0	+	12	11	plus	23	0.0217391	acp7_c4_rnaAligned	0.780799	1	1	FALSE	AKR1E2_plus	FALSE	FALSE	FALSE	FALSE
chr1	19302707	19312146	AKR7A2	0	-	18	9	minus	27	0.166667	acp6_c1_rnaAligned	2.86047	0.122078	0.428873	FALSE	AKR7A2_minus	FALSE	FALSE	FALSE	FALSE
chr1	19302707	19312146	AKR7A2	0	-	16	13	minus	29	0.0517241	acp6_c2_rnaAligned	3.07236	0.711071	0.984049	FALSE	AKR7A2_minus	FALSE	FALSE	FALSE	FALSE
chr1	19302707	19312146	AKR7A2	0	-	10	14	minus	24	-0.0833333	acp6_c5_rnaAligned	2.54264	0.541256	0.916432	FALSE	AKR7A2_minus	FALSE	FALSE	FALSE	FALSE
chr1	19302707	19312146	AKR7A2	0	-	18	21	minus	39	-0.0384615	acp6_c6_rnaAligned	4.13179	0.749259	0.994678	FALSE	AKR7A2_minus	FALSE	FALSE	FALSE	FALSE
chr1	19274228	19288770	AKR7A3	0	-	4	8	minus	12	-0.166667	acp6_c5_rnaAligned	0.825196	0.387695	0.801445	FALSE	AKR7A3_minus	FALSE	FALSE	FALSE	FALSE
chr1	19274228	19288770	AKR7A3	0	-	6	4	minus	10	0.1	acp6_c6_rnaAligned	0.687663	0.753906	0.994678	FALSE	AKR7A3_minus	FALSE	FALSE	FALSE	FALSE
chr14	104769348	104795748	AKT1	0	-	52	59	minus	111	-0.0315315	acp6_c1_rnaAligned	4.20455	0.56922	0.898975	FALSE	AKT1_minus	FALSE	FALSE	FALSE	FALSE
chr14	104769348	104795748	AKT1	0	-	148	145	minus	293	0.00511945	acp6_c2_rnaAligned	11.0985	0.907012	1	FALSE	AKT1_minus	FALSE	FALSE	FALSE	FALSE
chr14	104769348	104795748	AKT1	0	-	128	138	minus	266	-0.018797	acp6_c5_rnaAligned	10.0758	0.581151	0.929735	FALSE	AKT1_minus	FALSE	FALSE	FALSE	FALSE
chr14	104769348	104795748	AKT1	0	-	164	176	minus	340	-0.0176471	acp6_c6_rnaAligned	12.8788	0.550865	0.895563	FALSE	AKT1_minus	FALSE	FALSE	FALSE	FALSE
chr19	49869032	49878356	AKT1S1	0	-	51	43	minus	94	0.0425532	acp6_c1_rnaAligned	10.0815	0.470492	0.831145	FALSE	AKT1S1_minus	FALSE	FALSE	FALSE	FALSE
chr19	49869032	49878356	AKT1S1	0	-	41	33	minus	74	0.054054	acp6_c2_rnaAligned	7.93651	0.415985	0.798735	FALSE	AKT1S1_minus	FALSE	FALSE	FALSE	FALSE
chr19	49869032	49878356	AKT1S1	0	-	36	38	minus	74	-0.0135135	acp6_c5_rnaAligned	7.93651	0.907561	1	FALSE	AKT1S1_minus	FALSE	FALSE	FALSE	FALSE
chr19	49869032	49878356	AKT1S1	0	-	73	56	minus	129	0.0658915	acp6_c6_rnaAligned	13.8353	0.158654	0.519333	FALSE	AKT1S1_minus	FALSE	FALSE	FALSE	FALSE
chr19	40230316	40285345	AKT2	0	-	229	197	minus	426	0.0375587	acp6_c1_rnaAligned	7.74137	0.133014	0.453237	FALSE	AKT2_minus	FALSE	FALSE	FALSE	FALSE
chr19	40230316	40285345	AKT2	0	-	204	178	minus	382	0.0340314	acp6_c2_rnaAligned	6.94179	0.200796	0.561773	FALSE	AKT2_minus	FALSE	FALSE	FALSE	FALSE
chr19	40230316	40285345	AKT2	0	-	145	173	minus	318	-0.0440252	acp6_c5_rnaAligned	5.77877	0.129874	0.485916	FALSE	AKT2_minus	FALSE	FALSE	FALSE	FALSE
chr19	40230316	40285345	AKT2	0	-	207	193	minus	400	0.0175	acp6_c6_rnaAligned	7.26889	0.515743	0.879405	FALSE	AKT2_minus	FALSE	FALSE	FALSE	FALSE
chr19	40230316	40285345	AKT2	0	-	138	169	minus	307	-0.0504886	acp7_c1_rnaAligned	5.57888	0.086696	0.402535	FALSE	AKT2_minus	FALSE	FALSE	FALSE	FALSE
chr19	40230316	40285345	AKT2	0	-	136	111	minus	247	0.0506073	acp7_c2_rnaAligned	4.48854	0.12657	0.464032	FALSE	AKT2_minus	FALSE	FALSE	FALSE	FALSE
chr19	40230316	40285345	AKT2	0	-	142	117	minus	259	0.0482626	acp7_c4_rnaAligned	4.70661	0.135732	0.49573	FALSE	AKT2_minus	FALSE	FALSE	FALSE	FALSE
chr9	113386311	113401284	ALAD	0	-	172	163	minus	335	0.0134328	acp6_c1_rnaAligned	22.3736	0.662113	0.951144	FALSE	ALAD_minus	FALSE	FALSE	FALSE	FALSE
chr9	113386311	113401284	ALAD	0	-	158	141	minus	299	0.0284281	acp6_c2_rnaAligned	19.9693	0.354828	0.746877	FALSE	ALAD_minus	FALSE	FALSE	FALSE	FALSE
chr9	113386311	113401284	ALAD	0	-	136	154	minus	290	-0.0310345	acp6_c5_rnaAligned	19.3682	0.318147	0.752833	FALSE	ALAD_minus	FALSE	FALSE	FALSE	FALSE
chr9	113386311	113401284	ALAD	0	-	152	185	minus	337	-0.0489614	acp6_c6_rnaAligned	22.5072	0.0811536	0.36282	FALSE	ALAD_minus	FALSE	FALSE	FALSE	FALSE
chr3	52198082	52214327	ALAS1	0	+	9	6	plus	15	0.1	acp7_c1_rnaAligned	0.923361	0.607239	0.943649	FALSE	ALAS1_plus	FALSE	FALSE	FALSE	FALSE
chr3	52198082	52214327	ALAS1	0	+	5	4	plus	9	0.0555556	acp7_c4_rnaAligned	0.554017	1	1	FALSE	ALAS1_plus	FALSE	FALSE	FALSE	FALSE
chr3	105366908	105576900	ALCAM	0	+	228	217	plus	445	0.0123596	acp6_c1_rnaAligned	2.11913	0.635517	0.935315	FALSE	ALCAM_plus	FALSE	FALSE	FALSE	FALSE
chr3	105366908	105576900	ALCAM	0	+	273	269	plus	542	0.00369004	acp6_c2_rnaAligned	2.58105	0.897483	1	FALSE	ALCAM_plus	FALSE	FALSE	FALSE	FALSE
chr3	105366908	105576900	ALCAM	0	+	101	131	plus	232	-0.0646552	acp6_c5_rnaAligned	1.1048	0.0566832	0.305816	FALSE	ALCAM_plus	FALSE	FALSE	FALSE	FALSE
chr3	105366908	105576900	ALCAM	0	+	155	223	plus	378	-0.0899471	acp6_c6_rnaAligned	1.80007	0.00055139	0.00939288	TRUE	ALCAM_plus	FALSE	FALSE	FALSE	FALSE
chr3	105366908	105576900	ALCAM	0	+	1302	1275	plus	2577	0.00523865	acp7_c1_rnaAligned	12.2719	0.608539	0.944634	FALSE	ALCAM_plus	FALSE	FALSE	FALSE	FALSE
chr3	105366908	105576900	ALCAM	0	+	914	1056	plus	1970	-0.0360406	acp7_c2_rnaAligned	9.38131	0.00148297	0.0215523	TRUE	ALCAM_plus	FALSE	FALSE	FALSE	FALSE
chr3	105366908	105576900	ALCAM	0	+	1085	1202	plus	2287	-0.0255794	acp7_c4_rnaAligned	10.8909	0.0152636	0.126199	FALSE	ALCAM_plus	FALSE	FALSE	FALSE	FALSE
chr19	49453224	49471050	ALDH16A1	0	+	20	22	plus	42	-0.0238095	acp6_c1_rnaAligned	2.35611	0.877614	1	FALSE	ALDH16A1_plus	FALSE	FALSE	FALSE	FALSE
chr19	49453224	49471050	ALDH16A1	0	+	20	16	plus	36	0.0555556	acp6_c2_rnaAligned	2.01952	0.617719	0.931783	FALSE	ALDH16A1_plus	FALSE	FALSE	FALSE	FALSE
chr19	49453224	49471050	ALDH16A1	0	+	15	18	plus	33	-0.0454545	acp6_c5_rnaAligned	1.85123	0.728332	0.993504	FALSE	ALDH16A1_plus	FALSE	FALSE	FALSE	FALSE
chr19	49453224	49471050	ALDH16A1	0	+	22	22	plus	44	0	acp6_c6_rnaAligned	2.4683	1	1	FALSE	ALDH16A1_plus	FALSE	FALSE	FALSE	FALSE
chr19	49453224	49471050	ALDH16A1	0	+	10	16	plus	26	-0.115385	acp7_c1_rnaAligned	1.45854	0.32694	0.757881	FALSE	ALDH16A1_plus	FALSE	FALSE	FALSE	FALSE
chr19	49453224	49471050	ALDH16A1	0	+	11	5	plus	16	0.1875	acp7_c2_rnaAligned	0.897565	0.210114	0.591401	FALSE	ALDH16A1_plus	FALSE	FALSE	FALSE	FALSE
chr19	49453224	49471050	ALDH16A1	0	+	10	12	plus	22	-0.0454545	acp7_c4_rnaAligned	1.23415	0.831812	1	FALSE	ALDH16A1_plus	FALSE	FALSE	FALSE	FALSE
chr10	95605940	95656711	ALDH18A1	0	-	109	120	minus	229	-0.0240175	acp6_c1_rnaAligned	4.51045	0.508817	0.856545	FALSE	ALDH18A1_minus	FALSE	FALSE	FALSE	FALSE
chr10	95605940	95656711	ALDH18A1	0	-	73	90	minus	163	-0.0521472	acp6_c2_rnaAligned	3.21049	0.209995	0.576341	FALSE	ALDH18A1_minus	FALSE	FALSE	FALSE	FALSE
chr10	95605940	95656711	ALDH18A1	0	-	80	89	minus	169	-0.0266272	acp6_c5_rnaAligned	3.32867	0.538427	0.916432	FALSE	ALDH18A1_minus	FALSE	FALSE	FALSE	FALSE
chr10	95605940	95656711	ALDH18A1	0	-	81	71	minus	152	0.0328947	acp6_c6_rnaAligned	2.99384	0.465509	0.843234	FALSE	ALDH18A1_minus	FALSE	FALSE	FALSE	FALSE
chr10	95605940	95656711	ALDH18A1	0	-	340	316	minus	656	0.0182927	acp7_c1_rnaAligned	12.9208	0.369198	0.792388	FALSE	ALDH18A1_minus	FALSE	FALSE	FALSE	FALSE
chr10	95605940	95656711	ALDH18A1	0	-	197	197	minus	394	0	acp7_c2_rnaAligned	7.76034	1	1	FALSE	ALDH18A1_minus	FALSE	FALSE	FALSE	FALSE
chr10	95605940	95656711	ALDH18A1	0	-	230	203	minus	433	0.0311778	acp7_c4_rnaAligned	8.52849	0.21144	0.611196	FALSE	ALDH18A1_minus	FALSE	FALSE	FALSE	FALSE
chr15	57953428	58065711	ALDH1A2	0	-	19	5	minus	24	0.291667	acp6_c1_rnaAligned	0.213746	0.00661075	0.0605045	FALSE	ALDH1A2_minus	TRUE	FALSE	FALSE	FALSE
chr15	57953428	58065711	ALDH1A2	0	-	8	11	minus	19	-0.0789474	acp6_c2_rnaAligned	0.169215	0.647606	0.950468	FALSE	ALDH1A2_minus	FALSE	FALSE	FALSE	FALSE
chr15	57953428	58065711	ALDH1A2	0	-	9	2	minus	11	0.318182	acp6_c5_rnaAligned	0.0979667	0.0654297	0.329386	FALSE	ALDH1A2_minus	TRUE	TRUE	FALSE	FALSE
chr15	57953428	58065711	ALDH1A2	0	-	6	9	minus	15	-0.1	acp6_c6_rnaAligned	0.133591	0.607239	0.926526	FALSE	ALDH1A2_minus	FALSE	FALSE	FALSE	FALSE
chr15	100879830	100916626	ALDH1A3	0	+	5	8	plus	13	-0.115385	acp6_c2_rnaAligned	0.353299	0.581055	0.911242	FALSE	ALDH1A3_plus	FALSE	FALSE	FALSE	FALSE
chr15	100879830	100916626	ALDH1A3	0	+	4	6	plus	10	-0.1	acp6_c6_rnaAligned	0.271769	0.753906	0.994678	FALSE	ALDH1A3_plus	FALSE	FALSE	FALSE	FALSE
chr9	38392701	38398661	ALDH1B1	0	+	66	86	plus	152	-0.0657895	acp6_c1_rnaAligned	25.5034	0.123009	0.431578	FALSE	ALDH1B1_plus	FALSE	FALSE	FALSE	FALSE
chr9	38392701	38398661	ALDH1B1	0	+	73	103	plus	176	-0.0852273	acp6_c2_rnaAligned	29.5302	0.0285314	0.174116	FALSE	ALDH1B1_plus	FALSE	FALSE	FALSE	FALSE
chr9	38392701	38398661	ALDH1B1	0	+	69	88	plus	157	-0.0605096	acp6_c5_rnaAligned	26.3423	0.150614	0.523881	FALSE	ALDH1B1_plus	FALSE	FALSE	FALSE	FALSE
chr9	38392701	38398661	ALDH1B1	0	+	84	120	plus	204	-0.0882353	acp6_c6_rnaAligned	34.2282	0.0140669	0.118946	FALSE	ALDH1B1_plus	FALSE	FALSE	FALSE	FALSE
chr9	38392701	38398661	ALDH1B1	0	+	105	64	plus	169	0.121302	acp7_c1_rnaAligned	28.3557	0.00200134	0.0296297	TRUE	ALDH1B1_plus	FALSE	FALSE	FALSE	FALSE
chr9	38392701	38398661	ALDH1B1	0	+	47	37	plus	84	0.0595238	acp7_c2_rnaAligned	14.094	0.326134	0.724892	FALSE	ALDH1B1_plus	FALSE	FALSE	FALSE	FALSE
chr9	38392701	38398661	ALDH1B1	0	+	45	32	plus	77	0.0844156	acp7_c4_rnaAligned	12.9195	0.171061	0.553835	FALSE	ALDH1B1_plus	FALSE	FALSE	FALSE	FALSE
chr12	105019789	105084458	ALDH1L2	0	-	79	91	minus	170	-0.0352941	acp6_c1_rnaAligned	2.62877	0.398927	0.778784	FALSE	ALDH1L2_minus	FALSE	FALSE	FALSE	FALSE
chr12	105019789	105084458	ALDH1L2	0	-	160	144	minus	304	0.0263158	acp6_c2_rnaAligned	4.70086	0.389653	0.774697	FALSE	ALDH1L2_minus	FALSE	FALSE	FALSE	FALSE
chr12	105019789	105084458	ALDH1L2	0	-	85	75	minus	160	0.03125	acp6_c5_rnaAligned	2.47414	0.476882	0.869653	FALSE	ALDH1L2_minus	FALSE	FALSE	FALSE	FALSE
chr12	105019789	105084458	ALDH1L2	0	-	129	150	minus	279	-0.0376344	acp6_c6_rnaAligned	4.31428	0.231103	0.629768	FALSE	ALDH1L2_minus	FALSE	FALSE	FALSE	FALSE
chr12	105019789	105084458	ALDH1L2	0	-	343	350	minus	693	-0.0050505	acp7_c1_rnaAligned	10.7161	0.819728	1	FALSE	ALDH1L2_minus	FALSE	FALSE	FALSE	FALSE
chr12	105019789	105084458	ALDH1L2	0	-	303	286	minus	589	0.0144312	acp7_c2_rnaAligned	9.10792	0.509757	0.87407	FALSE	ALDH1L2_minus	FALSE	FALSE	FALSE	FALSE
chr12	105019789	105084458	ALDH1L2	0	-	146	155	minus	301	-0.0149502	acp7_c4_rnaAligned	4.65447	0.644791	0.960686	FALSE	ALDH1L2_minus	FALSE	FALSE	FALSE	FALSE
chr12	111766932	111817532	ALDH2	0	+	7	16	plus	23	-0.195652	acp6_c1_rnaAligned	0.454545	0.0931397	0.372235	FALSE	ALDH2_plus	FALSE	FALSE	FALSE	FALSE
chr12	111766932	111817532	ALDH2	0	+	19	22	plus	41	-0.0365854	acp6_c2_rnaAligned	0.810277	0.755229	1	FALSE	ALDH2_plus	FALSE	FALSE	FALSE	FALSE
chr12	111766932	111817532	ALDH2	0	+	11	9	plus	20	0.05	acp6_c5_rnaAligned	0.395257	0.823803	1	FALSE	ALDH2_plus	FALSE	FALSE	FALSE	FALSE
chr12	111766932	111817532	ALDH2	0	+	12	10	plus	22	0.0454546	acp6_c6_rnaAligned	0.434783	0.831812	1	FALSE	ALDH2_plus	FALSE	FALSE	FALSE	FALSE
chr12	111766932	111817532	ALDH2	0	+	15	13	plus	28	0.0357143	acp7_c1_rnaAligned	0.55336	0.850554	1	FALSE	ALDH2_plus	FALSE	FALSE	FALSE	FALSE
chr12	111766932	111817532	ALDH2	0	+	13	10	plus	23	0.0652174	acp7_c2_rnaAligned	0.454545	0.677639	0.969068	FALSE	ALDH2_plus	FALSE	FALSE	FALSE	FALSE
chr12	111766932	111817532	ALDH2	0	+	17	6	plus	23	0.23913	acp7_c4_rnaAligned	0.454545	0.0346897	0.225085	FALSE	ALDH2_plus	TRUE	FALSE	FALSE	FALSE
chr17	19737983	19748298	ALDH3A1	0	-	19	4	minus	23	0.326087	acp7_c1_rnaAligned	2.22976	0.00259948	0.0361353	TRUE	ALDH3A1_minus	TRUE	TRUE	FALSE	FALSE
chr17	19737983	19748298	ALDH3A1	0	-	7	1	minus	8	0.375	acp7_c2_rnaAligned	0.77557	0.0703125	0.334812	FALSE	ALDH3A1_minus	TRUE	TRUE	FALSE	FALSE
chr17	19737983	19748298	ALDH3A1	0	-	9	16	minus	25	-0.14	acp7_c4_rnaAligned	2.42365	0.229523	0.633004	FALSE	ALDH3A1_minus	FALSE	FALSE	FALSE	FALSE
chr17	19648135	19677596	ALDH3A2	0	+	46	39	plus	85	0.0411765	acp6_c1_rnaAligned	2.88517	0.515426	0.862797	FALSE	ALDH3A2_plus	FALSE	FALSE	FALSE	FALSE
chr17	19648135	19677596	ALDH3A2	0	+	81	88	plus	169	-0.0207101	acp6_c2_rnaAligned	5.7364	0.644542	0.949563	FALSE	ALDH3A2_plus	FALSE	FALSE	FALSE	FALSE
chr17	19648135	19677596	ALDH3A2	0	+	49	36	plus	85	0.0764706	acp6_c5_rnaAligned	2.88517	0.19276	0.59745	FALSE	ALDH3A2_plus	FALSE	FALSE	FALSE	FALSE
chr17	19648135	19677596	ALDH3A2	0	+	41	42	plus	83	-0.0060241	acp6_c6_rnaAligned	2.81728	1	1	FALSE	ALDH3A2_plus	FALSE	FALSE	FALSE	FALSE
chr17	19648135	19677596	ALDH3A2	0	+	121	112	plus	233	0.0193133	acp7_c1_rnaAligned	7.90876	0.600306	0.943649	FALSE	ALDH3A2_plus	FALSE	FALSE	FALSE	FALSE
chr17	19648135	19677596	ALDH3A2	0	+	113	98	plus	211	0.035545	acp7_c2_rnaAligned	7.16201	0.335161	0.733278	FALSE	ALDH3A2_plus	FALSE	FALSE	FALSE	FALSE
chr17	19648135	19677596	ALDH3A2	0	+	69	89	plus	158	-0.0632911	acp7_c4_rnaAligned	5.36302	0.130386	0.485822	FALSE	ALDH3A2_plus	FALSE	FALSE	FALSE	FALSE
chr11	68008546	68029276	ALDH3B1	0	+	45	48	plus	93	-0.016129	acp6_c1_rnaAligned	4.48625	0.835846	1	FALSE	ALDH3B1_plus	FALSE	FALSE	FALSE	FALSE
chr11	68008546	68029276	ALDH3B1	0	+	39	45	plus	84	-0.0357143	acp6_c2_rnaAligned	4.0521	0.585647	0.911242	FALSE	ALDH3B1_plus	FALSE	FALSE	FALSE	FALSE
chr11	68008546	68029276	ALDH3B1	0	+	28	22	plus	50	0.06	acp6_c5_rnaAligned	2.41196	0.479888	0.869653	FALSE	ALDH3B1_plus	FALSE	FALSE	FALSE	FALSE
chr11	68008546	68029276	ALDH3B1	0	+	57	57	plus	114	0	acp6_c6_rnaAligned	5.49928	1	1	FALSE	ALDH3B1_plus	FALSE	FALSE	FALSE	FALSE
chr11	68008546	68029276	ALDH3B1	0	+	175	207	plus	382	-0.0418848	acp7_c1_rnaAligned	18.4274	0.112598	0.461121	FALSE	ALDH3B1_plus	FALSE	FALSE	FALSE	FALSE
chr11	68008546	68029276	ALDH3B1	0	+	147	182	plus	329	-0.0531915	acp7_c2_rnaAligned	15.8707	0.0606996	0.311873	FALSE	ALDH3B1_plus	FALSE	FALSE	FALSE	FALSE
chr11	68008546	68029276	ALDH3B1	0	+	112	196	plus	308	-0.136364	acp7_c4_rnaAligned	14.8577	1.96e-06	6.32e-05	TRUE	ALDH3B1_plus	FALSE	FALSE	FALSE	FALSE
chr1	18871429	18902555	ALDH4A1	0	-	31	35	minus	66	-0.030303	acp6_c1_rnaAligned	2.12041	0.712231	0.979463	FALSE	ALDH4A1_minus	FALSE	FALSE	FALSE	FALSE
chr1	18871429	18902555	ALDH4A1	0	-	21	28	minus	49	-0.0714286	acp6_c2_rnaAligned	1.57425	0.391603	0.774697	FALSE	ALDH4A1_minus	FALSE	FALSE	FALSE	FALSE
chr1	18871429	18902555	ALDH4A1	0	-	16	18	minus	34	-0.0294118	acp6_c5_rnaAligned	1.09233	0.864166	1	FALSE	ALDH4A1_minus	FALSE	FALSE	FALSE	FALSE
chr1	18871429	18902555	ALDH4A1	0	-	22	38	minus	60	-0.133333	acp6_c6_rnaAligned	1.92765	0.0518939	0.281695	FALSE	ALDH4A1_minus	FALSE	FALSE	FALSE	FALSE
chr14	74056846	74084453	ALDH6A1	0	-	54	69	minus	123	-0.0609756	acp6_c1_rnaAligned	4.45539	0.206647	0.573912	FALSE	ALDH6A1_minus	FALSE	FALSE	FALSE	FALSE
chr14	74056846	74084453	ALDH6A1	0	-	61	95	minus	156	-0.108974	acp6_c2_rnaAligned	5.65074	0.00803278	0.0716791	FALSE	ALDH6A1_minus	FALSE	FALSE	FALSE	FALSE
chr14	74056846	74084453	ALDH6A1	0	-	51	58	minus	109	-0.0321101	acp6_c5_rnaAligned	3.94827	0.5657	0.925806	FALSE	ALDH6A1_minus	FALSE	FALSE	FALSE	FALSE
chr14	74056846	74084453	ALDH6A1	0	-	15	28	minus	43	-0.151163	acp6_c6_rnaAligned	1.55758	0.065994	0.32092	FALSE	ALDH6A1_minus	FALSE	FALSE	FALSE	FALSE
chr14	74056846	74084453	ALDH6A1	0	-	27	43	minus	70	-0.114286	acp7_c1_rnaAligned	2.53559	0.0722379	0.35796	FALSE	ALDH6A1_minus	FALSE	FALSE	FALSE	FALSE
chr14	74056846	74084453	ALDH6A1	0	-	34	48	minus	82	-0.0853659	acp7_c2_rnaAligned	2.97026	0.150675	0.505058	FALSE	ALDH6A1_minus	FALSE	FALSE	FALSE	FALSE
chr14	74056846	74084453	ALDH6A1	0	-	30	40	minus	70	-0.0714286	acp7_c4_rnaAligned	2.53559	0.281979	0.695194	FALSE	ALDH6A1_minus	FALSE	FALSE	FALSE	FALSE
chr5	126541840	126595219	ALDH7A1	0	-	207	219	minus	426	-0.0140845	acp6_c1_rnaAligned	7.98067	0.594119	0.914108	FALSE	ALDH7A1_minus	FALSE	FALSE	FALSE	FALSE
chr5	126541840	126595219	ALDH7A1	0	-	268	261	minus	529	0.00661626	acp6_c2_rnaAligned	9.91026	0.794223	1	FALSE	ALDH7A1_minus	FALSE	FALSE	FALSE	FALSE
chr5	126541840	126595219	ALDH7A1	0	-	197	164	minus	361	0.0457064	acp6_c5_rnaAligned	6.76296	0.092003	0.402114	FALSE	ALDH7A1_minus	FALSE	FALSE	FALSE	FALSE
chr5	126541840	126595219	ALDH7A1	0	-	263	248	minus	511	0.0146771	acp6_c6_rnaAligned	9.57305	0.535744	0.89401	FALSE	ALDH7A1_minus	FALSE	FALSE	FALSE	FALSE
chr5	126541840	126595219	ALDH7A1	0	-	91	79	minus	170	0.0352941	acp7_c1_rnaAligned	3.18477	0.398927	0.81567	FALSE	ALDH7A1_minus	FALSE	FALSE	FALSE	FALSE
chr5	126541840	126595219	ALDH7A1	0	-	76	81	minus	157	-0.0159236	acp7_c2_rnaAligned	2.94123	0.749665	0.997646	FALSE	ALDH7A1_minus	FALSE	FALSE	FALSE	FALSE
chr5	126541840	126595219	ALDH7A1	0	-	66	73	minus	139	-0.0251799	acp7_c4_rnaAligned	2.60402	0.610974	0.938112	FALSE	ALDH7A1_minus	FALSE	FALSE	FALSE	FALSE
chr1	165662215	165698562	ALDH9A1	0	-	6	4	minus	10	0.1	acp6_c1_rnaAligned	0.275126	0.753906	0.995597	FALSE	ALDH9A1_minus	FALSE	FALSE	FALSE	FALSE
chr1	165662215	165698562	ALDH9A1	0	-	6	7	minus	13	-0.0384615	acp6_c2_rnaAligned	0.357664	1	1	FALSE	ALDH9A1_minus	FALSE	FALSE	FALSE	FALSE
chr1	165662215	165698562	ALDH9A1	0	-	211	222	minus	433	-0.0127021	acp7_c1_rnaAligned	11.913	0.630873	0.957219	FALSE	ALDH9A1_minus	FALSE	FALSE	FALSE	FALSE
chr1	165662215	165698562	ALDH9A1	0	-	163	142	minus	305	0.0344262	acp7_c2_rnaAligned	8.39134	0.252088	0.647984	FALSE	ALDH9A1_minus	FALSE	FALSE	FALSE	FALSE
chr1	165662215	165698562	ALDH9A1	0	-	172	150	minus	322	0.0341615	acp7_c4_rnaAligned	8.85905	0.241842	0.648915	FALSE	ALDH9A1_minus	FALSE	FALSE	FALSE	FALSE
chr16	30064278	30070420	ALDOA	0	+	10	8	plus	18	0.0555556	acp6_c1_rnaAligned	2.93064	0.814529	1	FALSE	ALDOA_plus	FALSE	FALSE	FALSE	FALSE
chr16	30064278	30070420	ALDOA	0	+	4	8	plus	12	-0.166667	acp6_c2_rnaAligned	1.95376	0.387695	0.773776	FALSE	ALDOA_plus	FALSE	FALSE	FALSE	FALSE
chr16	30064278	30070420	ALDOA	0	+	9	10	plus	19	-0.0263158	acp6_c5_rnaAligned	3.09345	1	1	FALSE	ALDOA_plus	FALSE	FALSE	FALSE	FALSE
chr16	30064278	30070420	ALDOA	0	+	13	13	plus	26	0	acp6_c6_rnaAligned	4.23315	1	1	FALSE	ALDOA_plus	FALSE	FALSE	FALSE	FALSE
chr16	5071842	5087379	ALG1	0	+	76	84	plus	160	-0.025	acp6_c1_rnaAligned	10.298	0.580129	0.904093	FALSE	ALG1_plus	FALSE	FALSE	FALSE	FALSE
chr16	5071842	5087379	ALG1	0	+	69	54	plus	123	0.0609756	acp6_c2_rnaAligned	7.91659	0.206647	0.574366	FALSE	ALG1_plus	FALSE	FALSE	FALSE	FALSE
chr16	5071842	5087379	ALG1	0	+	48	47	plus	95	0.00526316	acp6_c5_rnaAligned	6.11444	1	1	FALSE	ALG1_plus	FALSE	FALSE	FALSE	FALSE
chr16	5071842	5087379	ALG1	0	+	76	91	plus	167	-0.0449102	acp6_c6_rnaAligned	10.7485	0.278612	0.686769	FALSE	ALG1_plus	FALSE	FALSE	FALSE	FALSE
chr16	5071842	5087379	ALG1	0	+	36	54	plus	90	-0.1	acp7_c1_rnaAligned	5.79262	0.0725495	0.35866	FALSE	ALG1_plus	FALSE	FALSE	FALSE	FALSE
chr16	5071842	5087379	ALG1	0	+	28	29	plus	57	-0.0087719	acp7_c2_rnaAligned	3.66866	1	1	FALSE	ALG1_plus	FALSE	FALSE	FALSE	FALSE
chr16	5071842	5087379	ALG1	0	+	27	37	plus	64	-0.078125	acp7_c4_rnaAligned	4.1192	0.260435	0.675333	FALSE	ALG1_plus	FALSE	FALSE	FALSE	FALSE
chr12	34022376	34028302	ALG10	0	+	13	14	plus	27	-0.0185185	acp6_c1_rnaAligned	4.55619	1	1	FALSE	ALG10_plus	FALSE	FALSE	FALSE	FALSE
chr12	34022376	34028302	ALG10	0	+	16	17	plus	33	-0.0151515	acp6_c2_rnaAligned	5.56868	1	1	FALSE	ALG10_plus	FALSE	FALSE	FALSE	FALSE
chr12	34022376	34028302	ALG10	0	+	6	9	plus	15	-0.1	acp6_c5_rnaAligned	2.53122	0.607239	0.940294	FALSE	ALG10_plus	FALSE	FALSE	FALSE	FALSE
chr12	34022376	34028302	ALG10	0	+	16	12	plus	28	0.0714286	acp6_c6_rnaAligned	4.72494	0.571588	0.90869	FALSE	ALG10_plus	FALSE	FALSE	FALSE	FALSE
chr12	34022376	34028302	ALG10	0	+	33	22	plus	55	0.1	acp7_c1_rnaAligned	9.28113	0.177001	0.572932	FALSE	ALG10_plus	FALSE	FALSE	FALSE	FALSE
chr12	34022376	34028302	ALG10	0	+	23	27	plus	50	-0.04	acp7_c2_rnaAligned	8.43739	0.671811	0.965266	FALSE	ALG10_plus	FALSE	FALSE	FALSE	FALSE
chr12	34022376	34028302	ALG10	0	+	20	15	plus	35	0.0714286	acp7_c4_rnaAligned	5.90618	0.49956	0.880867	FALSE	ALG10_plus	FALSE	FALSE	FALSE	FALSE
chr12	38316686	38329721	ALG10B	0	+	5	12	plus	17	-0.205882	acp6_c1_rnaAligned	1.30418	0.143463	0.472049	FALSE	ALG10B_plus	TRUE	FALSE	FALSE	FALSE
chr12	38316686	38329721	ALG10B	0	+	11	6	plus	17	0.147059	acp6_c2_rnaAligned	1.30418	0.332306	0.724845	FALSE	ALG10B_plus	FALSE	FALSE	FALSE	FALSE
chr12	38316686	38329721	ALG10B	0	+	11	9	plus	20	0.05	acp6_c5_rnaAligned	1.53433	0.823803	1	FALSE	ALG10B_plus	FALSE	FALSE	FALSE	FALSE
chr12	38316686	38329721	ALG10B	0	+	12	17	plus	29	-0.0862069	acp6_c6_rnaAligned	2.22478	0.458258	0.83801	FALSE	ALG10B_plus	FALSE	FALSE	FALSE	FALSE
chr12	38316686	38329721	ALG10B	0	+	46	55	plus	101	-0.0445545	acp7_c1_rnaAligned	7.74837	0.42616	0.838387	FALSE	ALG10B_plus	FALSE	FALSE	FALSE	FALSE
chr12	38316686	38329721	ALG10B	0	+	43	69	plus	112	-0.116071	acp7_c2_rnaAligned	8.59225	0.0177658	0.140551	FALSE	ALG10B_plus	FALSE	FALSE	FALSE	FALSE
chr12	38316686	38329721	ALG10B	0	+	43	53	plus	96	-0.0520833	acp7_c4_rnaAligned	7.36479	0.358398	0.76914	FALSE	ALG10B_plus	FALSE	FALSE	FALSE	FALSE
chr1	94974404	95072951	ALG14	0	-	11	13	minus	24	-0.0416667	acp6_c1_rnaAligned	0.243539	0.83882	1	FALSE	ALG14_minus	FALSE	FALSE	FALSE	FALSE
chr1	94974404	95072951	ALG14	0	-	19	9	minus	28	0.178571	acp6_c2_rnaAligned	0.284128	0.0871586	0.356645	FALSE	ALG14_minus	FALSE	FALSE	FALSE	FALSE
chr1	94974404	95072951	ALG14	0	-	5	7	minus	12	-0.0833333	acp6_c5_rnaAligned	0.121769	0.774414	1	FALSE	ALG14_minus	FALSE	FALSE	FALSE	FALSE
chr1	94974404	95072951	ALG14	0	-	19	16	minus	35	0.0428571	acp6_c6_rnaAligned	0.35516	0.735879	0.991816	FALSE	ALG14_minus	FALSE	FALSE	FALSE	FALSE
chr1	94974404	95072951	ALG14	0	-	12	14	minus	26	-0.0384615	acp7_c1_rnaAligned	0.263833	0.845019	1	FALSE	ALG14_minus	FALSE	FALSE	FALSE	FALSE
chr1	94974404	95072951	ALG14	0	-	22	9	minus	31	0.209677	acp7_c2_rnaAligned	0.314571	0.0294494	0.19513	FALSE	ALG14_minus	TRUE	FALSE	FALSE	FALSE
chr1	94974404	95072951	ALG14	0	-	12	14	minus	26	-0.0384615	acp7_c4_rnaAligned	0.263833	0.845019	1	FALSE	ALG14_minus	FALSE	FALSE	FALSE	FALSE
chr9	99216424	99221942	ALG2	0	-	20	14	minus	34	0.0882353	acp6_c1_rnaAligned	6.16165	0.391528	0.769904	FALSE	ALG2_minus	FALSE	FALSE	FALSE	FALSE
chr9	99216424	99221942	ALG2	0	-	15	17	minus	32	-0.03125	acp6_c2_rnaAligned	5.7992	0.86005	1	FALSE	ALG2_minus	FALSE	FALSE	FALSE	FALSE
chr9	99216424	99221942	ALG2	0	-	16	22	minus	38	-0.0789474	acp6_c5_rnaAligned	6.88655	0.417692	0.827659	FALSE	ALG2_minus	FALSE	FALSE	FALSE	FALSE
chr9	99216424	99221942	ALG2	0	-	30	23	minus	53	0.0660377	acp6_c6_rnaAligned	9.60493	0.410103	0.802147	FALSE	ALG2_minus	FALSE	FALSE	FALSE	FALSE
chr3	184242300	184249525	ALG3	0	-	16	23	minus	39	-0.0897436	acp6_c1_rnaAligned	5.39792	0.336784	0.727949	FALSE	ALG3_minus	FALSE	FALSE	FALSE	FALSE
chr3	184242300	184249525	ALG3	0	-	14	15	minus	29	-0.0172414	acp6_c5_rnaAligned	4.01384	1	1	FALSE	ALG3_minus	FALSE	FALSE	FALSE	FALSE
chr3	184242300	184249525	ALG3	0	-	22	32	minus	54	-0.0925926	acp6_c6_rnaAligned	7.47405	0.220328	0.618537	FALSE	ALG3_minus	FALSE	FALSE	FALSE	FALSE
chr13	36949737	36999367	ALG5	0	-	44	28	minus	72	0.111111	acp6_c1_rnaAligned	1.45074	0.0763691	0.330851	FALSE	ALG5_minus	FALSE	FALSE	FALSE	FALSE
chr13	36949737	36999367	ALG5	0	-	33	31	minus	64	0.015625	acp6_c2_rnaAligned	1.28954	0.900653	1	FALSE	ALG5_minus	FALSE	FALSE	FALSE	FALSE
chr13	36949737	36999367	ALG5	0	-	20	23	minus	43	-0.0348837	acp6_c5_rnaAligned	0.866411	0.760792	0.999609	FALSE	ALG5_minus	FALSE	FALSE	FALSE	FALSE
chr13	36949737	36999367	ALG5	0	-	40	32	minus	72	0.0555556	acp6_c6_rnaAligned	1.45074	0.409579	0.802147	FALSE	ALG5_minus	FALSE	FALSE	FALSE	FALSE
chr13	36949737	36999367	ALG5	0	-	37	43	minus	80	-0.0375	acp7_c1_rnaAligned	1.61193	0.576431	0.929905	FALSE	ALG5_minus	FALSE	FALSE	FALSE	FALSE
chr13	36949737	36999367	ALG5	0	-	42	34	minus	76	0.0526316	acp7_c2_rnaAligned	1.53133	0.422191	0.80562	FALSE	ALG5_minus	FALSE	FALSE	FALSE	FALSE
chr13	36949737	36999367	ALG5	0	-	39	24	minus	63	0.119048	acp7_c4_rnaAligned	1.26939	0.0769258	0.361342	FALSE	ALG5_minus	FALSE	FALSE	FALSE	FALSE
chr1	63367626	63438553	ALG6	0	+	53	44	plus	97	0.0463918	acp6_c1_rnaAligned	1.3676	0.416775	0.792376	FALSE	ALG6_plus	FALSE	FALSE	FALSE	FALSE
chr1	63367626	63438553	ALG6	0	+	54	37	plus	91	0.0934066	acp6_c2_rnaAligned	1.28301	0.0929469	0.369842	FALSE	ALG6_plus	FALSE	FALSE	FALSE	FALSE
chr1	63367626	63438553	ALG6	0	+	34	38	plus	72	-0.0277778	acp6_c5_rnaAligned	1.01513	0.723948	0.991326	FALSE	ALG6_plus	FALSE	FALSE	FALSE	FALSE
chr1	63367626	63438553	ALG6	0	+	41	59	plus	100	-0.09	acp6_c6_rnaAligned	1.4099	0.0886261	0.38105	FALSE	ALG6_plus	FALSE	FALSE	FALSE	FALSE
chr1	63367626	63438553	ALG6	0	+	31	39	plus	70	-0.0571429	acp7_c1_rnaAligned	0.98693	0.402963	0.818223	FALSE	ALG6_plus	FALSE	FALSE	FALSE	FALSE
chr1	63367626	63438553	ALG6	0	+	37	32	plus	69	0.0362319	acp7_c2_rnaAligned	0.972831	0.630456	0.940572	FALSE	ALG6_plus	FALSE	FALSE	FALSE	FALSE
chr1	63367626	63438553	ALG6	0	+	34	35	plus	69	-0.0072464	acp7_c4_rnaAligned	0.972831	1	1	FALSE	ALG6_plus	FALSE	FALSE	FALSE	FALSE
chr11	78100945	78139626	ALG8	0	-	40	58	minus	98	-0.0918367	acp6_c1_rnaAligned	2.53354	0.0854106	0.355566	FALSE	ALG8_minus	FALSE	FALSE	FALSE	FALSE
chr11	78100945	78139626	ALG8	0	-	38	64	minus	102	-0.127451	acp6_c2_rnaAligned	2.63695	0.0129204	0.100494	FALSE	ALG8_minus	FALSE	FALSE	FALSE	FALSE
chr11	78100945	78139626	ALG8	0	-	40	39	minus	79	0.00632911	acp6_c5_rnaAligned	2.04235	1	1	FALSE	ALG8_minus	FALSE	FALSE	FALSE	FALSE
chr11	78100945	78139626	ALG8	0	-	72	75	minus	147	-0.0102041	acp6_c6_rnaAligned	3.80032	0.86905	1	FALSE	ALG8_minus	FALSE	FALSE	FALSE	FALSE
chr11	78100945	78139626	ALG8	0	-	208	253	minus	461	-0.0488069	acp7_c1_rnaAligned	11.918	0.0403183	0.249553	FALSE	ALG8_minus	FALSE	FALSE	FALSE	FALSE
chr11	78100945	78139626	ALG8	0	-	208	232	minus	440	-0.0272727	acp7_c2_rnaAligned	11.3751	0.27285	0.66628	FALSE	ALG8_minus	FALSE	FALSE	FALSE	FALSE
chr11	78100945	78139626	ALG8	0	-	168	183	minus	351	-0.0213675	acp7_c4_rnaAligned	9.07422	0.454952	0.847582	FALSE	ALG8_minus	FALSE	FALSE	FALSE	FALSE
chr11	111782194	111871581	ALG9	0	-	28	15	minus	43	0.151163	acp6_c1_rnaAligned	0.481054	0.065994	0.301528	FALSE	ALG9_minus	FALSE	FALSE	FALSE	FALSE
chr11	111782194	111871581	ALG9	0	-	28	39	minus	67	-0.0820896	acp6_c2_rnaAligned	0.74955	0.221549	0.592372	FALSE	ALG9_minus	FALSE	FALSE	FALSE	FALSE
chr11	111782194	111871581	ALG9	0	-	18	26	minus	44	-0.0909091	acp6_c5_rnaAligned	0.492242	0.291215	0.718895	FALSE	ALG9_minus	FALSE	FALSE	FALSE	FALSE
chr11	111782194	111871581	ALG9	0	-	33	35	minus	68	-0.0147059	acp6_c6_rnaAligned	0.760737	0.903597	1	FALSE	ALG9_minus	FALSE	FALSE	FALSE	FALSE
chr11	111782194	111871581	ALG9	0	-	52	42	minus	94	0.0531915	acp7_c1_rnaAligned	1.05161	0.353328	0.777137	FALSE	ALG9_minus	FALSE	FALSE	FALSE	FALSE
chr11	111782194	111871581	ALG9	0	-	45	36	minus	81	0.0555556	acp7_c2_rnaAligned	0.906172	0.374174	0.767015	FALSE	ALG9_minus	FALSE	FALSE	FALSE	FALSE
chr11	111782194	111871581	ALG9	0	-	43	46	minus	89	-0.0168539	acp7_c4_rnaAligned	0.995671	0.832258	1	FALSE	ALG9_minus	FALSE	FALSE	FALSE	FALSE
chr2	29192773	29921586	ALK	0	-	4	13	minus	17	-0.264706	acp6_c1_rnaAligned	0.0233256	0.0490418	0.249709	FALSE	ALK_minus	TRUE	FALSE	FALSE	FALSE
chr2	29192773	29921586	ALK	0	-	7	11	minus	18	-0.111111	acp6_c2_rnaAligned	0.0246977	0.480682	0.849484	FALSE	ALK_minus	FALSE	FALSE	FALSE	FALSE
chr2	29192773	29921586	ALK	0	-	9	7	minus	16	0.0625	acp6_c5_rnaAligned	0.0219535	0.803619	1	FALSE	ALK_minus	FALSE	FALSE	FALSE	FALSE
chr14	77672403	77708023	ALKBH1	0	-	9	22	minus	31	-0.209677	acp6_c1_rnaAligned	0.870298	0.0294494	0.179121	FALSE	ALKBH1_minus	TRUE	FALSE	FALSE	FALSE
chr14	77672403	77708023	ALKBH1	0	-	14	25	minus	39	-0.141026	acp6_c2_rnaAligned	1.09489	0.108129	0.405104	FALSE	ALKBH1_minus	FALSE	FALSE	FALSE	FALSE
chr14	77672403	77708023	ALKBH1	0	-	1	14	minus	15	-0.433333	acp6_c5_rnaAligned	0.421112	0.00097656	0.0156872	TRUE	ALKBH1_minus	TRUE	TRUE	TRUE	FALSE
chr14	77672403	77708023	ALKBH1	0	-	19	14	minus	33	0.0757576	acp6_c6_rnaAligned	0.926446	0.48685	0.856732	FALSE	ALKBH1_minus	FALSE	FALSE	FALSE	FALSE
chr14	77672403	77708023	ALKBH1	0	-	52	77	minus	129	-0.0968992	acp7_c1_rnaAligned	3.62156	0.0341867	0.227659	FALSE	ALKBH1_minus	FALSE	FALSE	FALSE	FALSE
chr14	77672403	77708023	ALKBH1	0	-	33	24	minus	57	0.0789474	acp7_c2_rnaAligned	1.60022	0.289244	0.678282	FALSE	ALKBH1_minus	FALSE	FALSE	FALSE	FALSE
chr14	77672403	77708023	ALKBH1	0	-	18	63	minus	81	-0.277778	acp7_c4_rnaAligned	2.274	5.2e-07	1.89e-05	TRUE	ALKBH1_minus	TRUE	FALSE	FALSE	FALSE
chr11	43880830	43920274	ALKBH3	0	+	106	79	plus	185	0.072973	acp6_c1_rnaAligned	4.69019	0.0556387	0.271797	FALSE	ALKBH3_plus	FALSE	FALSE	FALSE	FALSE
chr11	43880830	43920274	ALKBH3	0	+	139	118	plus	257	0.040856	acp6_c2_rnaAligned	6.51557	0.212108	0.579009	FALSE	ALKBH3_plus	FALSE	FALSE	FALSE	FALSE
chr11	43880830	43920274	ALKBH3	0	+	54	44	plus	98	0.0510204	acp6_c5_rnaAligned	2.48454	0.363354	0.788057	FALSE	ALKBH3_plus	FALSE	FALSE	FALSE	FALSE
chr11	43880830	43920274	ALKBH3	0	+	111	110	plus	221	0.00226244	acp6_c6_rnaAligned	5.60288	1	1	FALSE	ALKBH3_plus	FALSE	FALSE	FALSE	FALSE
chr11	43880830	43920274	ALKBH3	0	+	133	107	plus	240	0.0541667	acp7_c1_rnaAligned	6.08458	0.106388	0.446795	FALSE	ALKBH3_plus	FALSE	FALSE	FALSE	FALSE
chr11	43880830	43920274	ALKBH3	0	+	111	85	plus	196	0.0663265	acp7_c2_rnaAligned	4.96907	0.0738758	0.34389	FALSE	ALKBH3_plus	FALSE	FALSE	FALSE	FALSE
chr11	43880830	43920274	ALKBH3	0	+	109	100	plus	209	0.0215311	acp7_c4_rnaAligned	5.29865	0.580115	0.923748	FALSE	ALKBH3_plus	FALSE	FALSE	FALSE	FALSE
chr7	102456237	102464863	ALKBH4	0	-	13	18	minus	31	-0.0806452	acp6_c1_rnaAligned	3.59379	0.47313	0.831145	FALSE	ALKBH4_minus	FALSE	FALSE	FALSE	FALSE
chr7	102456237	102464863	ALKBH4	0	-	17	19	minus	36	-0.0277778	acp6_c2_rnaAligned	4.17343	0.867939	1	FALSE	ALKBH4_minus	FALSE	FALSE	FALSE	FALSE
chr7	102456237	102464863	ALKBH4	0	-	16	14	minus	30	0.0333333	acp6_c5_rnaAligned	3.47786	0.855536	1	FALSE	ALKBH4_minus	FALSE	FALSE	FALSE	FALSE
chr7	102456237	102464863	ALKBH4	0	-	15	32	minus	47	-0.180851	acp6_c6_rnaAligned	5.44864	0.0186238	0.143804	FALSE	ALKBH4_minus	FALSE	FALSE	FALSE	FALSE
chr7	102456237	102464863	ALKBH4	0	-	4	10	minus	14	-0.214286	acp7_c1_rnaAligned	1.623	0.179565	0.572932	FALSE	ALKBH4_minus	TRUE	FALSE	FALSE	FALSE
chr7	102456237	102464863	ALKBH4	0	-	6	3	minus	9	0.166667	acp7_c2_rnaAligned	1.04336	0.507812	0.872028	FALSE	ALKBH4_minus	FALSE	FALSE	FALSE	FALSE
chr7	102456237	102464863	ALKBH4	0	-	5	10	minus	15	-0.166667	acp7_c4_rnaAligned	1.73893	0.301758	0.709409	FALSE	ALKBH4_minus	FALSE	FALSE	FALSE	FALSE
chr17	18183827	18209954	ALKBH5	0	+	241	211	plus	452	0.0331858	acp6_c1_rnaAligned	17.3001	0.172485	0.523639	FALSE	ALKBH5_plus	FALSE	FALSE	FALSE	FALSE
chr17	18183827	18209954	ALKBH5	0	+	199	203	plus	402	-0.0049751	acp6_c2_rnaAligned	15.3864	0.881083	1	FALSE	ALKBH5_plus	FALSE	FALSE	FALSE	FALSE
chr17	18183827	18209954	ALKBH5	0	+	193	170	plus	363	0.0316804	acp6_c5_rnaAligned	13.8937	0.248177	0.670867	FALSE	ALKBH5_plus	FALSE	FALSE	FALSE	FALSE
chr17	18183827	18209954	ALKBH5	0	+	212	234	plus	446	-0.0246637	acp6_c6_rnaAligned	17.0705	0.32004	0.7294	FALSE	ALKBH5_plus	FALSE	FALSE	FALSE	FALSE
chr17	18183827	18209954	ALKBH5	0	+	538	478	plus	1016	0.0295276	acp7_c1_rnaAligned	38.887	0.0641173	0.338355	FALSE	ALKBH5_plus	FALSE	FALSE	FALSE	FALSE
chr17	18183827	18209954	ALKBH5	0	+	433	472	plus	905	-0.021547	acp7_c2_rnaAligned	34.6385	0.206506	0.591146	FALSE	ALKBH5_plus	FALSE	FALSE	FALSE	FALSE
chr17	18183827	18209954	ALKBH5	0	+	390	517	plus	907	-0.070011	acp7_c4_rnaAligned	34.715	2.79e-05	0.00071073	TRUE	ALKBH5_plus	FALSE	FALSE	FALSE	FALSE
chr19	36009119	36014239	ALKBH6	0	-	3	9	minus	12	-0.25	acp7_c1_rnaAligned	2.34375	0.145996	0.526486	FALSE	ALKBH6_minus	TRUE	FALSE	FALSE	FALSE
chr19	36009119	36014239	ALKBH6	0	-	6	2	minus	8	0.25	acp7_c4_rnaAligned	1.5625	0.289062	0.697154	FALSE	ALKBH6_minus	TRUE	FALSE	FALSE	FALSE
chr11	107502726	107565735	ALKBH8	0	-	22	11	minus	33	0.166667	acp6_c1_rnaAligned	0.523735	0.0801433	0.33988	FALSE	ALKBH8_minus	FALSE	FALSE	FALSE	FALSE
chr11	107502726	107565735	ALKBH8	0	-	16	26	minus	42	-0.119048	acp6_c2_rnaAligned	0.666571	0.164149	0.505223	FALSE	ALKBH8_minus	FALSE	FALSE	FALSE	FALSE
chr11	107502726	107565735	ALKBH8	0	-	11	11	minus	22	0	acp6_c5_rnaAligned	0.349156	1	1	FALSE	ALKBH8_minus	FALSE	FALSE	FALSE	FALSE
chr11	107502726	107565735	ALKBH8	0	-	21	19	minus	40	0.025	acp6_c6_rnaAligned	0.63483	0.874629	1	FALSE	ALKBH8_minus	FALSE	FALSE	FALSE	FALSE
chr4	112297368	112442621	ALPK1	0	+	53	65	plus	118	-0.0508475	acp6_c1_rnaAligned	0.812376	0.311231	0.699214	FALSE	ALPK1_plus	FALSE	FALSE	FALSE	FALSE
chr4	112297368	112442621	ALPK1	0	+	135	93	plus	228	0.0921053	acp6_c2_rnaAligned	1.56967	0.00649494	0.0615282	FALSE	ALPK1_plus	FALSE	FALSE	FALSE	FALSE
chr4	112297368	112442621	ALPK1	0	+	93	78	plus	171	0.0438597	acp6_c5_rnaAligned	1.17726	0.284314	0.713413	FALSE	ALPK1_plus	FALSE	FALSE	FALSE	FALSE
chr4	112297368	112442621	ALPK1	0	+	131	115	plus	246	0.0325203	acp6_c6_rnaAligned	1.6936	0.338903	0.745619	FALSE	ALPK1_plus	FALSE	FALSE	FALSE	FALSE
chr4	112297368	112442621	ALPK1	0	+	86	99	plus	185	-0.0351351	acp7_c1_rnaAligned	1.27364	0.377687	0.800612	FALSE	ALPK1_plus	FALSE	FALSE	FALSE	FALSE
chr4	112297368	112442621	ALPK1	0	+	119	75	plus	194	0.113402	acp7_c2_rnaAligned	1.3356	0.00194348	0.0268434	TRUE	ALPK1_plus	FALSE	FALSE	FALSE	FALSE
chr4	112297368	112442621	ALPK1	0	+	66	53	plus	119	0.0546218	acp7_c4_rnaAligned	0.81926	0.271248	0.681917	FALSE	ALPK1_plus	FALSE	FALSE	FALSE	FALSE
chr18	58481246	58629091	ALPK2	0	-	2222	2287	minus	4509	-0.0072078	acp6_c1_rnaAligned	30.4982	0.340539	0.731605	FALSE	ALPK2_minus	FALSE	FALSE	FALSE	FALSE
chr18	58481246	58629091	ALPK2	0	-	1082	1057	minus	2139	0.00584385	acp6_c2_rnaAligned	14.4679	0.603822	0.923172	FALSE	ALPK2_minus	FALSE	FALSE	FALSE	FALSE
chr18	58481246	58629091	ALPK2	0	-	756	852	minus	1608	-0.0298507	acp6_c5_rnaAligned	10.8763	0.0178049	0.147394	FALSE	ALPK2_minus	FALSE	FALSE	FALSE	FALSE
chr18	58481246	58629091	ALPK2	0	-	2200	2220	minus	4420	-0.0022624	acp6_c6_rnaAligned	29.8962	0.775045	0.999495	FALSE	ALPK2_minus	FALSE	FALSE	FALSE	FALSE
chr18	58481246	58629091	ALPK2	0	-	194	292	minus	486	-0.100823	acp7_c1_rnaAligned	3.28723	1.01e-05	0.00032249	TRUE	ALPK2_minus	FALSE	FALSE	FALSE	FALSE
chr18	58481246	58629091	ALPK2	0	-	241	280	minus	521	-0.037428	acp7_c2_rnaAligned	3.52396	0.0958564	0.400392	FALSE	ALPK2_minus	FALSE	FALSE	FALSE	FALSE
chr18	58481246	58629091	ALPK2	0	-	86	122	minus	208	-0.0865385	acp7_c4_rnaAligned	1.40688	0.0150318	0.124803	FALSE	ALPK2_minus	FALSE	FALSE	FALSE	FALSE
chr15	84817355	84873479	ALPK3	0	+	8	11	plus	19	-0.0789474	acp7_c1_rnaAligned	0.338536	0.647606	0.968477	FALSE	ALPK3_plus	FALSE	FALSE	FALSE	FALSE
chr15	84817355	84873479	ALPK3	0	+	7	6	plus	13	0.0384615	acp7_c2_rnaAligned	0.23163	1	1	FALSE	ALPK3_plus	FALSE	FALSE	FALSE	FALSE
chr15	84817355	84873479	ALPK3	0	+	23	2	plus	25	0.42	acp7_c4_rnaAligned	0.445442	1.94e-05	0.00051528	TRUE	ALPK3_plus	TRUE	TRUE	TRUE	FALSE
chr1	21508983	21578410	ALPL	0	+	44	5	plus	49	0.397959	acp6_c1_rnaAligned	0.705777	7.6e-09	2.94e-07	TRUE	ALPL_plus	TRUE	TRUE	FALSE	FALSE
chr1	21508983	21578410	ALPL	0	+	48	6	plus	54	0.388889	acp6_c2_rnaAligned	0.777795	3.26e-09	1.4e-07	TRUE	ALPL_plus	TRUE	TRUE	FALSE	FALSE
chr1	21508983	21578410	ALPL	0	+	11	2	plus	13	0.346154	acp6_c5_rnaAligned	0.187247	0.0224609	0.172282	FALSE	ALPL_plus	TRUE	TRUE	FALSE	FALSE
chr1	21508983	21578410	ALPL	0	+	272	25	plus	297	0.415825	acp6_c6_rnaAligned	4.27787	1.3e-53	2.82e-51	TRUE	ALPL_plus	TRUE	TRUE	TRUE	FALSE
chr1	21508983	21578410	ALPL	0	+	6	11	plus	17	-0.147059	acp7_c1_rnaAligned	0.244862	0.332306	0.760692	FALSE	ALPL_plus	FALSE	FALSE	FALSE	FALSE
chr1	21508983	21578410	ALPL	0	+	3	6	plus	9	-0.166667	acp7_c2_rnaAligned	0.129633	0.507812	0.872028	FALSE	ALPL_plus	FALSE	FALSE	FALSE	FALSE
chr2	201700266	201780933	ALS2	0	-	172	158	minus	330	0.0212121	acp6_c1_rnaAligned	4.09089	0.474277	0.83153	FALSE	ALS2_minus	FALSE	FALSE	FALSE	FALSE
chr2	201700266	201780933	ALS2	0	-	203	200	minus	403	0.00372208	acp6_c2_rnaAligned	4.99585	0.920657	1	FALSE	ALS2_minus	FALSE	FALSE	FALSE	FALSE
chr2	201700266	201780933	ALS2	0	-	108	108	minus	216	0	acp6_c5_rnaAligned	2.67767	1	1	FALSE	ALS2_minus	FALSE	FALSE	FALSE	FALSE
chr2	201700266	201780933	ALS2	0	-	187	202	minus	389	-0.0192802	acp6_c6_rnaAligned	4.82229	0.477858	0.850598	FALSE	ALS2_minus	FALSE	FALSE	FALSE	FALSE
chr2	201700266	201780933	ALS2	0	-	89	101	minus	190	-0.0315789	acp7_c1_rnaAligned	2.35536	0.424932	0.836713	FALSE	ALS2_minus	FALSE	FALSE	FALSE	FALSE
chr2	201700266	201780933	ALS2	0	-	77	76	minus	153	0.00326797	acp7_c2_rnaAligned	1.89669	1	1	FALSE	ALS2_minus	FALSE	FALSE	FALSE	FALSE
chr2	201700266	201780933	ALS2	0	-	51	49	minus	100	0.01	acp7_c4_rnaAligned	1.23966	0.920411	1	FALSE	ALS2_minus	FALSE	FALSE	FALSE	FALSE
chr3	46668994	46693679	ALS2CL	0	-	31	32	minus	63	-0.0079365	acp7_c1_rnaAligned	2.55216	1	1	FALSE	ALS2CL_minus	FALSE	FALSE	FALSE	FALSE
chr3	46668994	46693679	ALS2CL	0	-	22	14	minus	36	0.111111	acp7_c2_rnaAligned	1.45838	0.242985	0.6343	FALSE	ALS2CL_minus	FALSE	FALSE	FALSE	FALSE
chr3	46668994	46693679	ALS2CL	0	-	15	6	minus	21	0.214286	acp7_c4_rnaAligned	0.850719	0.0783539	0.364808	FALSE	ALS2CL_minus	TRUE	FALSE	FALSE	FALSE
chr5	33986164	34008050	AMACR	0	-	6	9	minus	15	-0.1	acp6_c5_rnaAligned	0.68537	0.607239	0.940294	FALSE	AMACR_minus	FALSE	FALSE	FALSE	FALSE
chr5	33986164	34008050	AMACR	0	-	5	13	minus	18	-0.222222	acp6_c6_rnaAligned	0.822444	0.0962524	0.39696	FALSE	AMACR_minus	TRUE	FALSE	FALSE	FALSE
chr5	33986164	34008050	AMACR	0	-	85	39	minus	124	0.185484	acp7_c1_rnaAligned	5.66572	4.41e-05	0.00120617	TRUE	AMACR_minus	FALSE	FALSE	FALSE	FALSE
chr5	33986164	34008050	AMACR	0	-	82	35	minus	117	0.200855	acp7_c2_rnaAligned	5.34588	1.65e-05	0.000443	TRUE	AMACR_minus	TRUE	FALSE	FALSE	FALSE
chr5	33986164	34008050	AMACR	0	-	77	47	minus	124	0.120968	acp7_c4_rnaAligned	5.66572	0.00893341	0.0859624	FALSE	AMACR_minus	FALSE	FALSE	FALSE	FALSE
chr11	46396411	46594023	AMBRA1	0	-	39	45	minus	84	-0.0357143	acp6_c1_rnaAligned	0.425075	0.585647	0.906935	FALSE	AMBRA1_minus	FALSE	FALSE	FALSE	FALSE
chr11	46396411	46594023	AMBRA1	0	-	37	39	minus	76	-0.0131579	acp6_c2_rnaAligned	0.384592	0.908777	1	FALSE	AMBRA1_minus	FALSE	FALSE	FALSE	FALSE
chr11	46396411	46594023	AMBRA1	0	-	19	34	minus	53	-0.141509	acp6_c5_rnaAligned	0.268202	0.0534388	0.296198	FALSE	AMBRA1_minus	FALSE	FALSE	FALSE	FALSE
chr11	46396411	46594023	AMBRA1	0	-	11	17	minus	28	-0.107143	acp6_c6_rnaAligned	0.141692	0.344928	0.746216	FALSE	AMBRA1_minus	FALSE	FALSE	FALSE	FALSE
chr11	46396411	46594023	AMBRA1	0	-	8	21	minus	29	-0.224138	acp7_c1_rnaAligned	0.146752	0.0241195	0.180127	FALSE	AMBRA1_minus	TRUE	FALSE	FALSE	FALSE
chr11	46396411	46594023	AMBRA1	0	-	12	24	minus	36	-0.166667	acp7_c2_rnaAligned	0.182175	0.0652453	0.322572	FALSE	AMBRA1_minus	FALSE	FALSE	FALSE	FALSE
chr11	46396411	46594023	AMBRA1	0	-	7	13	minus	20	-0.15	acp7_c4_rnaAligned	0.101208	0.263176	0.675333	FALSE	AMBRA1_minus	FALSE	FALSE	FALSE	FALSE
chr6	110814616	110895713	AMD1	0	+	173	231	plus	404	-0.0717822	acp6_c1_rnaAligned	4.98169	0.00451129	0.0452535	TRUE	AMD1_plus	FALSE	FALSE	FALSE	FALSE
chr6	110814616	110895713	AMD1	0	+	445	390	plus	835	0.0329341	acp6_c2_rnaAligned	10.2963	0.0615933	0.28982	FALSE	AMD1_plus	FALSE	FALSE	FALSE	FALSE
chr6	110814616	110895713	AMD1	0	+	154	179	plus	333	-0.0375375	acp6_c5_rnaAligned	4.10619	0.188365	0.591087	FALSE	AMD1_plus	FALSE	FALSE	FALSE	FALSE
chr6	110814616	110895713	AMD1	0	+	266	272	plus	538	-0.0055762	acp6_c6_rnaAligned	6.63403	0.829351	1	FALSE	AMD1_plus	FALSE	FALSE	FALSE	FALSE
chr6	110814616	110895713	AMD1	0	+	170	172	plus	342	-0.002924	acp7_c1_rnaAligned	4.21717	0.956887	1	FALSE	AMD1_plus	FALSE	FALSE	FALSE	FALSE
chr6	110814616	110895713	AMD1	0	+	191	214	plus	405	-0.0283951	acp7_c2_rnaAligned	4.99402	0.274292	0.668592	FALSE	AMD1_plus	FALSE	FALSE	FALSE	FALSE
chr6	110814616	110895713	AMD1	0	+	106	112	plus	218	-0.0137615	acp7_c4_rnaAligned	2.68814	0.734966	1	FALSE	AMD1_plus	FALSE	FALSE	FALSE	FALSE
chr12	95943330	95968720	AMDHD1	0	+	10	5	plus	15	0.166667	acp6_c2_rnaAligned	0.590784	0.301758	0.693645	FALSE	AMDHD1_plus	FALSE	FALSE	FALSE	FALSE
chr12	95943330	95968720	AMDHD1	0	+	9	8	plus	17	0.0294118	acp6_c6_rnaAligned	0.669555	1	1	FALSE	AMDHD1_plus	FALSE	FALSE	FALSE	FALSE
chr12	95943330	95968720	AMDHD1	0	+	7	11	plus	18	-0.111111	acp7_c1_rnaAligned	0.708941	0.480682	0.877615	FALSE	AMDHD1_plus	FALSE	FALSE	FALSE	FALSE
chr12	95943330	95968720	AMDHD1	0	+	8	3	plus	11	0.227273	acp7_c4_rnaAligned	0.433241	0.226562	0.633004	FALSE	AMDHD1_plus	TRUE	FALSE	FALSE	FALSE
chr16	56361451	56425545	AMFR	0	-	8	8	minus	16	0	acp7_c1_rnaAligned	0.249633	1	1	FALSE	AMFR_minus	FALSE	FALSE	FALSE	FALSE
chr16	56361451	56425545	AMFR	0	-	2	10	minus	12	-0.333333	acp7_c2_rnaAligned	0.187225	0.0385742	0.232573	FALSE	AMFR_minus	TRUE	TRUE	FALSE	FALSE
chr16	56361451	56425545	AMFR	0	-	8	6	minus	14	0.0714286	acp7_c4_rnaAligned	0.218429	0.790527	1	FALSE	AMFR_minus	FALSE	FALSE	FALSE	FALSE
chr12	47075706	47079959	AMIGO2	0	-	343	280	minus	623	0.0505618	acp7_c1_rnaAligned	146.485	0.0129297	0.117206	FALSE	AMIGO2_minus	FALSE	FALSE	FALSE	FALSE
chr12	47075706	47079959	AMIGO2	0	-	152	123	minus	275	0.0527273	acp7_c2_rnaAligned	64.6602	0.0911405	0.393904	FALSE	AMIGO2_minus	FALSE	FALSE	FALSE	FALSE
chr12	47075706	47079959	AMIGO2	0	-	251	245	minus	496	0.00604839	acp7_c4_rnaAligned	116.624	0.822391	1	FALSE	AMIGO2_minus	FALSE	FALSE	FALSE	FALSE
chr2	127861629	127885956	AMMECR1L	0	-	173	92	minus	265	0.15283	acp7_c1_rnaAligned	10.8932	7.37e-07	2.98e-05	TRUE	AMMECR1L_minus	FALSE	FALSE	FALSE	FALSE
chr2	127861629	127885956	AMMECR1L	0	-	118	44	minus	162	0.228395	acp7_c2_rnaAligned	6.65927	5.31e-09	2.45e-07	TRUE	AMMECR1L_minus	TRUE	FALSE	FALSE	FALSE
chr2	127861629	127885956	AMMECR1L	0	-	102	66	minus	168	0.107143	acp7_c4_rnaAligned	6.90591	0.00675137	0.0701594	FALSE	AMMECR1L_minus	FALSE	FALSE	FALSE	FALSE
chr12	31671136	31729174	AMN1	0	-	6	5	minus	11	0.0454546	acp6_c6_rnaAligned	0.189531	1	1	FALSE	AMN1_minus	FALSE	FALSE	FALSE	FALSE
chr12	31671136	31729174	AMN1	0	-	24	21	minus	45	0.0333333	acp7_c1_rnaAligned	0.775354	0.765992	1	FALSE	AMN1_minus	FALSE	FALSE	FALSE	FALSE
chr12	31671136	31729174	AMN1	0	-	12	15	minus	27	-0.0555556	acp7_c2_rnaAligned	0.465212	0.701108	0.984092	FALSE	AMN1_minus	FALSE	FALSE	FALSE	FALSE
chr12	31671136	31729174	AMN1	0	-	10	5	minus	15	0.166667	acp7_c4_rnaAligned	0.258451	0.301758	0.709409	FALSE	AMN1_minus	FALSE	FALSE	FALSE	FALSE
chr11	94706459	94876748	AMOTL1	0	+	11	6	plus	17	0.147059	acp6_c2_rnaAligned	0.0998303	0.332306	0.724845	FALSE	AMOTL1_plus	FALSE	FALSE	FALSE	FALSE
chr11	94706459	94876748	AMOTL1	0	+	6	5	plus	11	0.0454546	acp6_c5_rnaAligned	0.0645961	1	1	FALSE	AMOTL1_plus	FALSE	FALSE	FALSE	FALSE
chr11	94706459	94876748	AMOTL1	0	+	9	13	plus	22	-0.0909091	acp6_c6_rnaAligned	0.129192	0.523467	0.882411	FALSE	AMOTL1_plus	FALSE	FALSE	FALSE	FALSE
chr11	94706459	94876748	AMOTL1	0	+	14	6	plus	20	0.2	acp7_c1_rnaAligned	0.117447	0.115318	0.46525	FALSE	AMOTL1_plus	FALSE	FALSE	FALSE	FALSE
chr11	94706459	94876748	AMOTL1	0	+	7	11	plus	18	-0.111111	acp7_c2_rnaAligned	0.105703	0.480682	0.860688	FALSE	AMOTL1_plus	FALSE	FALSE	FALSE	FALSE
chr11	94706459	94876748	AMOTL1	0	+	8	7	plus	15	0.0333333	acp7_c4_rnaAligned	0.0880855	1	1	FALSE	AMOTL1_plus	FALSE	FALSE	FALSE	FALSE
chr3	134355344	134375417	AMOTL2	0	-	293	331	minus	624	-0.0304487	acp7_c1_rnaAligned	31.0865	0.138494	0.517144	FALSE	AMOTL2_minus	FALSE	FALSE	FALSE	FALSE
chr3	134355344	134375417	AMOTL2	0	-	349	310	minus	659	0.0295903	acp7_c2_rnaAligned	32.8302	0.138742	0.487715	FALSE	AMOTL2_minus	FALSE	FALSE	FALSE	FALSE
chr3	134355344	134375417	AMOTL2	0	-	76	69	minus	145	0.0241379	acp7_c4_rnaAligned	7.22363	0.618445	0.941562	FALSE	AMOTL2_minus	FALSE	FALSE	FALSE	FALSE
chr1	109619836	109632055	AMPD2	0	+	159	140	plus	299	0.0317726	acp6_c1_rnaAligned	24.4701	0.29788	0.688436	FALSE	AMPD2_plus	FALSE	FALSE	FALSE	FALSE
chr1	109619836	109632055	AMPD2	0	+	119	141	plus	260	-0.0423077	acp6_c2_rnaAligned	21.2783	0.192693	0.548139	FALSE	AMPD2_plus	FALSE	FALSE	FALSE	FALSE
chr1	109619836	109632055	AMPD2	0	+	122	125	plus	247	-0.0060729	acp6_c5_rnaAligned	20.2144	0.898771	1	FALSE	AMPD2_plus	FALSE	FALSE	FALSE	FALSE
chr1	109619836	109632055	AMPD2	0	+	116	156	plus	272	-0.0735294	acp6_c6_rnaAligned	22.2604	0.0178811	0.140338	FALSE	AMPD2_plus	FALSE	FALSE	FALSE	FALSE
chr1	109619836	109632055	AMPD2	0	+	48	51	plus	99	-0.0151515	acp7_c1_rnaAligned	8.10214	0.840822	1	FALSE	AMPD2_plus	FALSE	FALSE	FALSE	FALSE
chr1	109619836	109632055	AMPD2	0	+	38	37	plus	75	0.00666667	acp7_c2_rnaAligned	6.13798	1	1	FALSE	AMPD2_plus	FALSE	FALSE	FALSE	FALSE
chr1	109619836	109632055	AMPD2	0	+	31	31	plus	62	0	acp7_c4_rnaAligned	5.07406	1	1	FALSE	AMPD2_plus	FALSE	FALSE	FALSE	FALSE
chr11	10450387	10507579	AMPD3	0	+	30	14	plus	44	0.181818	acp6_c1_rnaAligned	0.769338	0.0226288	0.147704	FALSE	AMPD3_plus	FALSE	FALSE	FALSE	FALSE
chr11	10450387	10507579	AMPD3	0	+	18	20	plus	38	-0.0263158	acp6_c2_rnaAligned	0.664429	0.871415	1	FALSE	AMPD3_plus	FALSE	FALSE	FALSE	FALSE
chr11	10450387	10507579	AMPD3	0	+	17	19	plus	36	-0.0277778	acp6_c5_rnaAligned	0.629459	0.867939	1	FALSE	AMPD3_plus	FALSE	FALSE	FALSE	FALSE
chr11	10450387	10507579	AMPD3	0	+	55	88	plus	143	-0.115385	acp6_c6_rnaAligned	2.50035	0.00723667	0.0720354	FALSE	AMPD3_plus	FALSE	FALSE	FALSE	FALSE
chr11	10450387	10507579	AMPD3	0	+	9	11	plus	20	-0.05	acp7_c1_rnaAligned	0.349699	0.823803	1	FALSE	AMPD3_plus	FALSE	FALSE	FALSE	FALSE
chr7	38383703	38631373	AMPH	0	-	7	8	minus	15	-0.0333333	acp6_c1_rnaAligned	0.0605645	1	1	FALSE	AMPH_minus	FALSE	FALSE	FALSE	FALSE
chr7	38383703	38631373	AMPH	0	-	14	5	minus	19	0.236842	acp6_c2_rnaAligned	0.076715	0.0635681	0.29543	FALSE	AMPH_minus	TRUE	FALSE	FALSE	FALSE
chr7	38383703	38631373	AMPH	0	-	51	43	minus	94	0.0425532	acp6_c5_rnaAligned	0.379537	0.470492	0.867566	FALSE	AMPH_minus	FALSE	FALSE	FALSE	FALSE
chr7	38383703	38631373	AMPH	0	-	66	53	minus	119	0.0546218	acp6_c6_rnaAligned	0.480478	0.271248	0.676904	FALSE	AMPH_minus	FALSE	FALSE	FALSE	FALSE
chr3	49416777	49422473	AMT	0	-	5	7	minus	12	-0.0833333	acp6_c1_rnaAligned	2.10674	0.774414	1	FALSE	AMT_minus	FALSE	FALSE	FALSE	FALSE
chr3	49416777	49422473	AMT	0	-	10	9	minus	19	0.0263158	acp6_c2_rnaAligned	3.33567	1	1	FALSE	AMT_minus	FALSE	FALSE	FALSE	FALSE
chr3	49416777	49422473	AMT	0	-	7	7	minus	14	0	acp6_c5_rnaAligned	2.45787	1	1	FALSE	AMT_minus	FALSE	FALSE	FALSE	FALSE
chr3	49416777	49422473	AMT	0	-	6	5	minus	11	0.0454546	acp6_c6_rnaAligned	1.93118	1	1	FALSE	AMT_minus	FALSE	FALSE	FALSE	FALSE
chr3	49416777	49422473	AMT	0	-	8	12	minus	20	-0.1	acp7_c1_rnaAligned	3.51124	0.503445	0.891397	FALSE	AMT_minus	FALSE	FALSE	FALSE	FALSE
chr3	49416777	49422473	AMT	0	-	10	3	minus	13	0.269231	acp7_c2_rnaAligned	2.2823	0.0922852	0.394429	FALSE	AMT_minus	TRUE	FALSE	FALSE	FALSE
chr3	49416777	49422473	AMT	0	-	13	5	minus	18	0.222222	acp7_c4_rnaAligned	3.16011	0.0962524	0.411199	FALSE	AMT_minus	TRUE	FALSE	FALSE	FALSE
chr4	70518568	70532743	AMTN	0	+	70	5	plus	75	0.433333	acp7_c1_rnaAligned	5.29101	9.82e-16	8.89e-14	TRUE	AMTN_plus	TRUE	TRUE	TRUE	FALSE
chr1	103554643	103579534	AMY2B	0	+	26	16	plus	42	0.119048	acp6_c1_rnaAligned	1.68736	0.164149	0.509287	FALSE	AMY2B_plus	FALSE	FALSE	FALSE	FALSE
chr1	103554643	103579534	AMY2B	0	+	27	12	plus	39	0.192308	acp6_c2_rnaAligned	1.56683	0.0237027	0.151456	FALSE	AMY2B_plus	FALSE	FALSE	FALSE	FALSE
chr1	103554643	103579534	AMY2B	0	+	20	15	plus	35	0.0714286	acp6_c5_rnaAligned	1.40613	0.49956	0.889479	FALSE	AMY2B_plus	FALSE	FALSE	FALSE	FALSE
chr1	103554643	103579534	AMY2B	0	+	23	20	plus	43	0.0348837	acp6_c6_rnaAligned	1.72753	0.760792	0.99796	FALSE	AMY2B_plus	FALSE	FALSE	FALSE	FALSE
chr1	103554643	103579534	AMY2B	0	+	26	26	plus	52	0	acp7_c1_rnaAligned	2.08911	1	1	FALSE	AMY2B_plus	FALSE	FALSE	FALSE	FALSE
chr1	103554643	103579534	AMY2B	0	+	31	24	plus	55	0.0636364	acp7_c2_rnaAligned	2.20963	0.418754	0.804417	FALSE	AMY2B_plus	FALSE	FALSE	FALSE	FALSE
chr1	103554643	103579534	AMY2B	0	+	22	18	plus	40	0.05	acp7_c4_rnaAligned	1.60701	0.635828	0.951761	FALSE	AMY2B_plus	FALSE	FALSE	FALSE	FALSE
chr7	2679521	2765138	AMZ1	0	+	7	13	plus	20	-0.15	acp6_c6_rnaAligned	0.233598	0.263176	0.670523	FALSE	AMZ1_plus	FALSE	FALSE	FALSE	FALSE
chr7	2679521	2765138	AMZ1	0	+	4	4	plus	8	0	acp7_c1_rnaAligned	0.0934394	1	1	FALSE	AMZ1_plus	FALSE	FALSE	FALSE	FALSE
chr7	2679521	2765138	AMZ1	0	+	10	6	plus	16	0.125	acp7_c2_rnaAligned	0.186879	0.454498	0.83846	FALSE	AMZ1_plus	FALSE	FALSE	FALSE	FALSE
chr17	68206128	68257164	AMZ2	0	+	48	37	plus	85	0.0647059	acp6_c1_rnaAligned	1.66549	0.277999	0.661883	FALSE	AMZ2_plus	FALSE	FALSE	FALSE	FALSE
chr17	68206128	68257164	AMZ2	0	+	42	47	plus	89	-0.0280899	acp6_c2_rnaAligned	1.74387	0.671809	0.959667	FALSE	AMZ2_plus	FALSE	FALSE	FALSE	FALSE
chr17	68206128	68257164	AMZ2	0	+	53	48	plus	101	0.0247525	acp6_c5_rnaAligned	1.979	0.690826	0.974456	FALSE	AMZ2_plus	FALSE	FALSE	FALSE	FALSE
chr17	68206128	68257164	AMZ2	0	+	46	45	plus	91	0.00549451	acp6_c6_rnaAligned	1.78306	1	1	FALSE	AMZ2_plus	FALSE	FALSE	FALSE	FALSE
chr17	68206128	68257164	AMZ2	0	+	70	94	plus	164	-0.0731707	acp7_c1_rnaAligned	3.21342	0.072171	0.35796	FALSE	AMZ2_plus	FALSE	FALSE	FALSE	FALSE
chr17	68206128	68257164	AMZ2	0	+	69	105	plus	174	-0.103448	acp7_c2_rnaAligned	3.40936	0.00778793	0.0764718	FALSE	AMZ2_plus	FALSE	FALSE	FALSE	FALSE
chr17	68206128	68257164	AMZ2	0	+	46	53	plus	99	-0.0353535	acp7_c4_rnaAligned	1.93981	0.546713	0.905841	FALSE	AMZ2_plus	FALSE	FALSE	FALSE	FALSE
chr2	111766230	111884193	ANAPC1	0	-	10	5	minus	15	0.166667	acp6_c1_rnaAligned	0.127159	0.301758	0.690411	FALSE	ANAPC1_minus	FALSE	FALSE	FALSE	FALSE
chr2	111766230	111884193	ANAPC1	0	-	9	2	minus	11	0.318182	acp6_c5_rnaAligned	0.0932496	0.0654297	0.329386	FALSE	ANAPC1_minus	TRUE	TRUE	FALSE	FALSE
chr2	111766230	111884193	ANAPC1	0	-	4	8	minus	12	-0.166667	acp6_c6_rnaAligned	0.101727	0.387695	0.784698	FALSE	ANAPC1_minus	FALSE	FALSE	FALSE	FALSE
chr2	111766230	111884193	ANAPC1	0	-	308	237	minus	545	0.0651376	acp7_c1_rnaAligned	4.62009	0.00268075	0.0369601	TRUE	ANAPC1_minus	FALSE	FALSE	FALSE	FALSE
chr2	111766230	111884193	ANAPC1	0	-	235	201	minus	436	0.0389908	acp7_c2_rnaAligned	3.69607	0.113909	0.440981	FALSE	ANAPC1_minus	FALSE	FALSE	FALSE	FALSE
chr2	111766230	111884193	ANAPC1	0	-	202	182	minus	384	0.0260417	acp7_c4_rnaAligned	3.25526	0.332258	0.741168	FALSE	ANAPC1_minus	FALSE	FALSE	FALSE	FALSE
chr4	144994575	145098571	ANAPC10	0	-	3	7	minus	10	-0.2	acp6_c2_rnaAligned	0.0961575	0.34375	0.733123	FALSE	ANAPC10_minus	FALSE	FALSE	FALSE	FALSE
chr4	144994575	145098571	ANAPC10	0	-	45	63	minus	108	-0.0833333	acp7_c1_rnaAligned	1.0385	0.101433	0.432205	FALSE	ANAPC10_minus	FALSE	FALSE	FALSE	FALSE
chr4	144994575	145098571	ANAPC10	0	-	32	38	minus	70	-0.0428571	acp7_c2_rnaAligned	0.673103	0.550413	0.896259	FALSE	ANAPC10_minus	FALSE	FALSE	FALSE	FALSE
chr4	144994575	145098571	ANAPC10	0	-	40	43	minus	83	-0.0180723	acp7_c4_rnaAligned	0.798108	0.826405	1	FALSE	ANAPC10_minus	FALSE	FALSE	FALSE	FALSE
chr10	72216011	72235860	ANAPC16	0	+	11	14	plus	25	-0.06	acp6_c1_rnaAligned	1.25951	0.690038	0.966125	FALSE	ANAPC16_plus	FALSE	FALSE	FALSE	FALSE
chr10	72216011	72235860	ANAPC16	0	+	4	8	plus	12	-0.166667	acp6_c5_rnaAligned	0.604564	0.387695	0.801445	FALSE	ANAPC16_plus	FALSE	FALSE	FALSE	FALSE
chr10	72216011	72235860	ANAPC16	0	+	4	7	plus	11	-0.136364	acp6_c6_rnaAligned	0.554184	0.548828	0.89401	FALSE	ANAPC16_plus	FALSE	FALSE	FALSE	FALSE
chr9	137174783	137188560	ANAPC2	0	-	85	75	minus	160	0.03125	acp6_c1_rnaAligned	11.6136	0.476882	0.834507	FALSE	ANAPC2_minus	FALSE	FALSE	FALSE	FALSE
chr9	137174783	137188560	ANAPC2	0	-	86	70	minus	156	0.0512821	acp6_c2_rnaAligned	11.3232	0.229658	0.598691	FALSE	ANAPC2_minus	FALSE	FALSE	FALSE	FALSE
chr9	137174783	137188560	ANAPC2	0	-	60	54	minus	114	0.0263158	acp6_c5_rnaAligned	8.27466	0.639769	0.956166	FALSE	ANAPC2_minus	FALSE	FALSE	FALSE	FALSE
chr9	137174783	137188560	ANAPC2	0	-	94	97	minus	191	-0.0078534	acp6_c6_rnaAligned	13.8637	0.884985	1	FALSE	ANAPC2_minus	FALSE	FALSE	FALSE	FALSE
chr9	137174783	137188560	ANAPC2	0	-	70	85	minus	155	-0.0483871	acp7_c1_rnaAligned	11.2506	0.260732	0.693529	FALSE	ANAPC2_minus	FALSE	FALSE	FALSE	FALSE
chr9	137174783	137188560	ANAPC2	0	-	47	61	minus	108	-0.0648148	acp7_c2_rnaAligned	7.83915	0.210766	0.591447	FALSE	ANAPC2_minus	FALSE	FALSE	FALSE	FALSE
chr9	137174783	137188560	ANAPC2	0	-	57	46	minus	103	0.0533981	acp7_c4_rnaAligned	7.47623	0.324479	0.737612	FALSE	ANAPC2_minus	FALSE	FALSE	FALSE	FALSE
chr4	25377262	25418498	ANAPC4	0	+	23	27	plus	50	-0.04	acp6_c1_rnaAligned	1.21253	0.671811	0.955066	FALSE	ANAPC4_plus	FALSE	FALSE	FALSE	FALSE
chr4	25377262	25418498	ANAPC4	0	+	36	21	plus	57	0.131579	acp6_c2_rnaAligned	1.38229	0.0627367	0.294083	FALSE	ANAPC4_plus	FALSE	FALSE	FALSE	FALSE
chr4	25377262	25418498	ANAPC4	0	+	31	26	plus	57	0.0438597	acp6_c5_rnaAligned	1.38229	0.596642	0.939519	FALSE	ANAPC4_plus	FALSE	FALSE	FALSE	FALSE
chr4	25377262	25418498	ANAPC4	0	+	24	24	plus	48	0	acp6_c6_rnaAligned	1.16403	1	1	FALSE	ANAPC4_plus	FALSE	FALSE	FALSE	FALSE
chr4	25377262	25418498	ANAPC4	0	+	299	329	plus	628	-0.0238854	acp7_c1_rnaAligned	15.2294	0.247159	0.671828	FALSE	ANAPC4_plus	FALSE	FALSE	FALSE	FALSE
chr4	25377262	25418498	ANAPC4	0	+	272	300	plus	572	-0.0244755	acp7_c2_rnaAligned	13.8714	0.25891	0.655986	FALSE	ANAPC4_plus	FALSE	FALSE	FALSE	FALSE
chr4	25377262	25418498	ANAPC4	0	+	232	215	plus	447	0.0190157	acp7_c4_rnaAligned	10.84	0.449222	0.846937	FALSE	ANAPC4_plus	FALSE	FALSE	FALSE	FALSE
chr12	121308244	121354209	ANAPC5	0	-	77	76	minus	153	0.00326797	acp6_c1_rnaAligned	3.32862	1	1	FALSE	ANAPC5_minus	FALSE	FALSE	FALSE	FALSE
chr12	121308244	121354209	ANAPC5	0	-	83	73	minus	156	0.0320513	acp6_c2_rnaAligned	3.39389	0.471286	0.843676	FALSE	ANAPC5_minus	FALSE	FALSE	FALSE	FALSE
chr12	121308244	121354209	ANAPC5	0	-	61	83	minus	144	-0.0763889	acp6_c5_rnaAligned	3.13282	0.0797571	0.373315	FALSE	ANAPC5_minus	FALSE	FALSE	FALSE	FALSE
chr12	121308244	121354209	ANAPC5	0	-	88	82	minus	170	0.0176471	acp6_c6_rnaAligned	3.69847	0.701482	0.972696	FALSE	ANAPC5_minus	FALSE	FALSE	FALSE	FALSE
[truncated: 54,726 more rows]

## Sheet: Genes all
Gene (10,712)
A3GALT2
A4GALT
AACS
AADAT
AAGAB
AAK1
AAMDC
AAR2
AARS1
AARS2
AARSD1
AASDH
AASDHPPT
AASS
ABAT
ABCA1
ABCA10
ABCA13
ABCA2
ABCA3
ABCA4
ABCA5
ABCA7
ABCA8
ABCB10
ABCB11
ABCB4
ABCB6
ABCB9
ABCC1
ABCC10
ABCC2
ABCC3
ABCC4
ABCC5
ABCC9
ABCD3
ABCD4
ABCE1
ABCF2
ABCF2-H2BK1
ABCF3
ABHD10
ABHD12
ABHD13
ABHD14A
ABHD14A-ACY1
ABHD15
ABHD17A
ABHD17B
ABHD17C
ABHD18
ABHD2
ABHD3
ABHD4
ABHD5
ABHD6
ABHD8
ABI1
ABI2
ABI3BP
ABITRAM
ABL1
ABL2
ABLIM1
ABLIM3
ABRACL
ABRAXAS1
ABTB1
ABTB2
ABTB3
ACAA2
ACACA
ACACB
ACAD10
ACAD11
ACAD9
ACADM
ACADS
ACADSB
ACAN
ACAP2
ACAP3
ACAT1
ACAT2
ACBD3
ACBD4
ACBD5
ACBD6
ACBD7
ACCS
ACCSL
ACD
ACE
ACER2
ACIN1
ACKR3
ACKR4
ACLY
ACO1
ACOT11
ACOT13
ACOT2
ACOT7
ACOT8
ACOX1
ACOX3
ACP1
ACP2
ACP6
ACSF2
ACSF3
ACSL1
ACSL3
ACSS1
ACSS2
ACSS3
ACTA2
ACTG1
ACTL6A
ACTMAP
ACTN1
ACTN4
ACTR10
ACTR1A
ACTR1B
ACTR2
ACTR3
ACTR3B
ACTR3C
ACTR5
ACTR6
ACTR8
ACTRT3
ACVR1
ACVR1B
ACVR2A
ACVR2B
ACVRL1
ACYP1
ACYP2
ADA
ADA2
ADAM10
ADAM11
ADAM12
ADAM15
ADAM17
ADAM19
ADAM20
ADAM21
ADAM22
ADAM23
ADAM28
ADAM33
ADAM9
ADAMTS1
ADAMTS10
ADAMTS12
ADAMTS13
ADAMTS14
ADAMTS15
ADAMTS16
ADAMTS17
ADAMTS2
ADAMTS3
ADAMTS4
ADAMTS5
ADAMTS6
ADAMTS7
ADAMTS9
ADAMTSL1
ADAMTSL3
ADAMTSL4
ADAMTSL5
ADAR
ADARB1
ADAT1
ADAT2
ADAT3
ADCK1
ADCK2
ADCK5
ADCY1
ADCY2
ADCY3
ADCY4
ADCY6
ADCY7
ADCY9
ADD1
ADD2
ADD3
ADGRA2
ADGRA3
ADGRB2
ADGRB3
ADGRE5
ADGRG6
ADGRL1
ADGRL2
ADGRL4
ADGRV1
ADH5
ADHFE1
ADI1
ADIPOR1
ADIPOR2
ADIRF
ADISSP
ADK
ADM2
ADNP
ADNP2
ADO
ADORA1
ADPGK
ADPRH
ADPRHL1
ADPRM
ADRA1D
ADRB2
ADRM1
ADSL
ADSS1
ADSS2
ADTRP
AEBP1
AEBP2
AEN
AFAP1
AFAP1L1
AFDN
AFF1
AFF3
AFF4
AFG2A
AFG3L2
AFMID
AFTPH
AGA
AGAP1
AGAP3
AGAP4
AGAP5
AGAP6
AGAP9
AGBL3
AGBL4
AGBL5
AGFG1
AGGF1
AGK
AGMO
AGO1
AGO2
AGO3
AGO4
AGPAT2
AGPAT3
AGPAT4
AGPAT5
AGPS
AGRN
AGT
AGTPBP1
AGTR1
AGTRAP
AHCTF1
AHCY
AHCYL1
AHCYL2
AHDC1
AHI1
AHNAK
AHNAK2
AHR
AHRR
AIDA
AIFM2
AIG1
AIMP1
AIMP2
AIP
AIRIM
AJAP1
AJUBA
AK1
AK2
AK3
AK5
AK8
AK9
AKAP1
AKAP10
AKAP11
AKAP12
AKAP13
AKAP3
AKAP6
AKAP7
AKAP8
AKAP8L
AKAP9
AKIP1
AKIRIN1
AKIRIN2
AKNA
AKNAD1
AKR1B1
AKR1C1
AKR1C2
AKR1C3
AKR1E2
AKR7A2
AKR7A3
AKT1
AKT1S1
AKT2
ALAD
ALAS1
ALCAM
ALDH16A1
ALDH18A1
ALDH1A2
ALDH1A3
ALDH1B1
ALDH1L2
ALDH2
ALDH3A1
ALDH3A2
ALDH3B1
ALDH4A1
ALDH6A1
ALDH7A1
ALDH9A1
ALDOA
ALG1
ALG10
ALG10B
ALG14
ALG2
ALG3
ALG5
ALG6
ALG8
ALG9
ALK
ALKBH1
ALKBH3
ALKBH4
ALKBH5
ALKBH6
ALKBH8
ALPK1
ALPK2
ALPK3
ALPL
ALS2
ALS2CL
AMACR
AMBRA1
AMD1
AMDHD1
AMFR
AMIGO2
AMMECR1L
AMN1
AMOTL1
AMOTL2
AMPD2
AMPD3
AMPH
AMT
AMTN
AMY2B
AMZ1
AMZ2
ANAPC1
ANAPC10
ANAPC16
ANAPC2
ANAPC4
ANAPC5
ANGEL1
ANGEL2
ANGPT1
ANGPTL2
ANK1
ANK2
ANK3
ANKAR
ANKDD1A
ANKDD1B
ANKEF1
ANKFY1
ANKH
ANKHD1
ANKHD1-EIF4EBP3
ANKIB1
ANKLE1
ANKLE2
ANKMY1
ANKMY2
ANKRA2
ANKRD10
ANKRD11
ANKRD12
ANKRD13A
ANKRD13B
ANKRD13C
ANKRD16
ANKRD17
ANKRD18B
ANKRD24
ANKRD26
ANKRD27
ANKRD28
ANKRD33B
ANKRD35
ANKRD36
ANKRD36B
ANKRD36C
ANKRD40
ANKRD42
ANKRD44
ANKRD46
ANKRD50
ANKRD52
ANKRD54
ANKRD6
ANKRD9
ANKS1A
ANKS1B
ANKS3
ANKS6
ANKZF1
ANLN
ANO10
ANO3
ANO6
ANO7
ANO8
ANP32A
ANP32B
ANPEP
ANTKMT
ANTXR1
ANTXR2
ANXA1
ANXA10
ANXA11
ANXA2
ANXA4
ANXA5
ANXA6
ANXA8
AOPEP
AOX1
AP1B1
AP1G1
AP1S1
AP1S3
AP2B1
AP2M1
AP2S1
AP3B1
AP3D1
AP3M1
AP3M2
AP3S1
AP3S2
AP4B1
AP4E1
AP4M1
AP4S1
AP5B1
AP5Z1
APAF1
APBA1
APBA2
APBA3
APBB1
APBB1IP
APBB2
APC
APCDD1L
APEH
APEX1
APH1B
API5
APIP
APLF
APLP2
APOBEC3B
APOBEC3C
APOBEC3D
APOBEC3F
APOL1
APOL2
APOL3
APOL6
APOLD1
APP
APPBP2
APPL1
APPL2
APRT
APTX
AQP1
AQR
ARAP1
ARAP2
ARAP3
ARB2A
ARCN1
AREL1
ARF1
ARF3
ARF4
ARF5
ARF6
ARFGAP1
ARFGAP2
ARFGAP3
ARFGEF1
ARFGEF2
ARFGEF3
ARFIP1
ARFIP2
ARFRP1
ARG2
ARGLU1
ARHGAP1
ARHGAP10
ARHGAP12
ARHGAP17
ARHGAP18
ARHGAP19
ARHGAP20
ARHGAP21
ARHGAP22
ARHGAP24
ARHGAP26
ARHGAP28
ARHGAP29
ARHGAP31
ARHGAP32
ARHGAP33
ARHGAP35
ARHGAP39
ARHGAP42
ARHGAP44
ARHGAP5
ARHGAP8
ARHGDIA
ARHGEF1
ARHGEF10L
ARHGEF11
ARHGEF12
ARHGEF17
ARHGEF18
ARHGEF19
ARHGEF2
ARHGEF25
ARHGEF28
ARHGEF3
ARHGEF37
ARHGEF39
ARHGEF4
ARHGEF40
ARHGEF5
ARHGEF7
ARID1A
ARID1B
ARID2
ARID3A
ARID3B
ARID4A
ARID4B
ARID5A
ARID5B
ARIH1
ARIH2
ARK2N
ARL1
ARL10
ARL13B
ARL14EP
ARL15
ARL16
ARL2
ARL2BP
ARL3
ARL4A
ARL4C
ARL5A
ARL5B
ARL6
ARL6IP1
ARL6IP5
ARL6IP6
ARL8A
ARL8B
ARMC10
ARMC2
ARMC5
ARMC6
ARMC8
ARMC9
ARMH1
ARMH3
ARMH4
ARMT1
ARNT
ARNT2
ARPC1A
ARPC2
ARPC4
ARPC4-TTLL3
ARPC5
ARPC5L
ARPIN
ARPIN-AP3S2
ARPP19
ARRB1
ARRB2
ARRDC1
ARRDC3
ARRDC4
ARRDC5
ARSA
ARSB
ARSG
ARSI
ARSJ
ARTN
ARV1
ARVCF
AS3MT
ASAH1
ASAH2B
ASAP1
ASAP2
ASB1
ASB13
ASB3
ASB5
ASB6
ASB7
ASB8
ASCC1
ASCC2
ASCC3
ASDURF
ASH1L
ASH2L
ASIC1
ASL
ASNS
ASNSD1
ASPH
ASPM
ASPN
ASPSCR1
ASS1
ASTE1
ASTN1
ASTN2
ASXL1
ASXL2
ASXL3
ATAD1
ATAD2
ATAD2B
ATAD3A
ATAD3B
ATAD5
ATE1
ATF1
ATF2
ATF3
ATF4
ATF5
ATF6
ATF7
ATF7-NPFF
ATF7IP
ATG10
ATG101
ATG12
ATG14
ATG16L1
ATG16L2
ATG2A
ATG2B
ATG3
ATG4B
ATG4C
ATG5
ATG7
ATIC
ATL1
ATL2
ATL3
ATM
ATN1
ATOH8
ATOSA
ATOSB
ATOX1
ATP10A
ATP10D
ATP11A
ATP11B
ATP13A1
ATP13A2
ATP13A3
ATP13A4
ATP1A1
ATP1B1
ATP1B3
ATP2A2
ATP2A3
ATP2B1
ATP2B4
ATP2C1
ATP5F1A
ATP5F1B
ATP5F1C
ATP5F1E
ATP5IF1
ATP5MC1
ATP5MC2
ATP5MC3
ATP5ME
ATP5MF
ATP5MF-PTCD1
ATP5MG
ATP5MJ
ATP5MK
ATP5PB
ATP5PD
ATP5PF
ATP5PO
ATP6V0A1
ATP6V0A2
ATP6V0B
ATP6V0E1
ATP6V1A
ATP6V1B1
ATP6V1B2
ATP6V1C1
ATP6V1E1
ATP6V1E2
ATP6V1F
ATP6V1G1
ATP6V1H
ATP7B
ATP8A1
ATP8A2
ATP8B1
ATP8B2
ATP8B3
ATP8B4
ATP9A
ATP9B
ATPAF1
ATPAF2
ATPSCKMT
ATR
ATRAID
ATRIP
ATRN
ATRNL1
ATXN1
ATXN10
ATXN1L
ATXN2
ATXN2L
ATXN3
ATXN7
ATXN7L1
ATXN7L3
ATXN7L3B
AUH
AUNIP
AUP1
AURKA
AURKB
AUTS2
AVEN
AVIL
AVL9
AVPI1
AXDND1
AXIN1
AXIN2
AXL
AZI2
AZIN1
AZIN2
B3GALNT1
B3GALNT2
B3GALT1
B3GALT5
B3GALT6
B3GAT3
B3GLCT
B3GNT2
B3GNT5
B3GNT8
B3GNTL1
B4GALNT3
B4GALNT4
B4GALT1
B4GALT2
B4GALT3
B4GALT4
B4GALT5
B4GALT7
B9D2
BAALC
BABAM1
BABAM2
BACE1
BACE2
BACH1
BACH2
BAD
BAG1
BAG2
BAG3
BAG4
BAG5
BAHCC1
BAHD1
BAIAP2
BAIAP2L1
BAK1
BAMBI
BANF1
BANK1
BANP
BARD1
BARX1
BASP1
BAX
BAZ1A
BAZ1B
BAZ2A
BAZ2B
BBC3
BBIP1
BBOF1
BBOX1
BBS1
BBS12
BBS2
BBS4
BBS5
BBS7
BBS9
BBX
BCAM
BCAP29
BCAR1
BCAR3
BCAS3
BCAS4
BCAT1
BCAT2
BCCIP
BCKDHA
BCKDHB
BCKDK
BCL10
BCL11A
BCL11B
BCL2
BCL2A1
BCL2L1
BCL2L11
BCL2L12
BCL2L13
BCL2L2
BCL2L2-PABPN1
BCL6
BCL7A
BCL7C
BCL9
BCL9L
BCLAF1
BCO2
BCR
BDH2
BDKRB1
BDKRB2
BDNF
BEGAIN
BEND3
BEND5
BEND6
BEND7
BET1
BET1L
BFSP1
BHLHE40
BICC1
BICD1
BICD2
BICRA
BICRAL
BID
BIN1
BIN3
BIRC2
BIRC3
BIRC5
BIRC6
BIVM
BIVM-ERCC5
BLACAT1
BLCAP
BLM
BLMH
BLOC1S2
BLOC1S5
BLOC1S6
BLTP1
BLTP2
BLTP3A
BLTP3B
BLVRA
BLVRB
BLZF1
BMAL1
BMAL2
BMF
BMP1
BMP2
BMP2K
BMP3
BMP4
BMP5
BMP8A
BMPER
BMPR1A
BMPR1B
BMPR2
BMS1
BNC1
BNC2
BNIP1
BNIP2
BNIP3
BNIP3L
BOC
BOD1
BOD1L1
BOK
BOLA1
BOP1
BORA
BORCS5
BORCS7
BORCS8
BORCS8-MEF2B
BPGM
BPHL
BPNT2
BPTF
BRAF
BRAP
BRAT1
BRCA1
BRCA2
BRD1
BRD10
BRD3
BRD3OS
BRD4
BRD7
BRD8
BRD9
BRF1
BRI3
BRI3BP
BRICD5
BRINP1
BRINP2
BRIP1
BRK1
BRME1
BRMS1
BRMS1L
BROX
BRPF1
BRPF3
BRSK1
BRWD1
BSCL2
BSDC1
BSG
BST1
BTAF1
BTBD1
BTBD10
BTBD16
BTBD19
BTBD2
BTBD3
BTBD6
BTBD8
BTBD9
BTC
BTD
BTF3
BTF3L4
BTG1
BTG3
BTN2A1
BTN3A1
BTN3A2
BTRC
BUB1B
BUB3
BUD23
BYSL
BZW1
BZW2
C10orf143
C10orf67
C10orf88
C11orf21
C11orf24
C11orf54
C11orf58
C11orf65
C11orf68
C11orf71
C11orf87
C11orf91
C11orf98
C12orf43
C12orf54
C12orf56
C12orf57
C12orf60
C12orf75
C13orf46
C14orf119
C14orf132
C14orf39
C14orf93
C15orf39
C15orf40
C15orf61
C16orf74
C16orf95
C17orf107
C17orf49
C17orf58
C17orf67
C17orf75
C18orf21
C18orf32
C18orf54
C19orf12
C19orf18
C19orf25
C19orf47
C1D
C1GALT1
C1orf131
C1orf159
C1orf174
C1orf198
C1orf21
C1orf216
C1orf43
C1orf50
C1orf52
C1orf74
C1orf87
C1QTNF1
C1QTNF2
C1QTNF3
C1QTNF6
C1R
C1RL
C20orf96
C21orf58
C21orf91
C22orf39
C2CD2
C2CD2L
C2CD3
C2CD5
C2orf42
C2orf74
C2orf76
C2orf81
C2orf88
C2orf92
C3
C3orf18
C3orf33
C3orf62
C3orf70
C4orf3
C4orf33
C4orf36
C5
C5orf15
C5orf22
C5orf24
C5orf46
C5orf63
C6orf120
C6orf163
C6orf62
C6orf89
C7orf25
C7orf50
C8orf34
C8orf44-SGK3
C8orf58
C8orf76
C8orf88
C8orf89
C9orf40
C9orf72
C9orf78
C9orf85
CA12
CA13
CA9
CAAP1
CAB39
CAB39L
CABCOCO1
CABIN1
CABLES1
CABYR
CACFD1
CACHD1
CACNA1A
CACNA1C
CACNA2D1
CACNA2D3
CACNB1
CACNB2
CACNB3
CACNB4
CACNG7
CACNG8
CACTIN
CACUL1
CACYBP
CAD
CADM1
CADM2
CADM4
CADPS
CADPS2
CAGE1
CALCOCO1
CALCOCO2
CALCRL
CALD1
CALHM5
CALM1
CALM2
CALM3
CALML4
CALN1
CALR
CALU
CAMK1
CAMK1D
CAMK1G
CAMK2B
CAMK2D
CAMK2G
CAMK4
CAMKK1
CAMKK2
CAMKMT
CAMSAP1
CAMSAP2
CAMTA1
CAMTA2
CAND1
CAND2
CANT1
CANX
CAP2
CAPG
CAPN1
CAPN10
CAPN14
CAPN15
CAPN2
CAPN3
CAPN5
CAPN7
CAPNS1
CAPRIN1
CAPRIN2
CAPS2
CAPSL
CAPZA1
CAPZA2
CAPZB
CARD11
CARD19
CARD8
CARD9
CARF
CARHSP1
CARM1
CARMIL1
CARNMT1
CARS1
CARS2
CASC3
CASD1
CASKIN2
CASP2
CASP3
CASP4
CASP6
CASP7
CASP8
CASP8AP2
CAST
CAT
CATSPER2
CATSPERE
CATSPERG
CAV1
CAV2
CAVIN1
CAVIN3
CAVIN4
CBARP
CBFA2T2
CBFB
CBL
CBLB
CBLL1
CBLN3
CBR1
CBR3
CBR4
CBS
CBX1
CBX2
CBX3
CBX4
CBX5
CBX6
CBX7
CBX8
CBY1
CC2D1A
CC2D2A
CCAR1
CCAR2
CCBE1
CCDC102A
CCDC102B
CCDC103
CCDC107
CCDC110
CCDC112
CCDC115
CCDC117
CCDC12
CCDC122
CCDC124
CCDC126
CCDC127
CCDC134
CCDC136
CCDC137
CCDC138
CCDC14
CCDC142
CCDC144A
CCDC146
CCDC148
CCDC149
CCDC15
CCDC150
CCDC152
CCDC157
CCDC159
CCDC167
CCDC169-SOHLH2
CCDC170
CCDC171
CCDC174
CCDC18
CCDC180
CCDC186
CCDC188
CCDC190
CCDC191
CCDC24
CCDC25
CCDC28A
CCDC3
CCDC30
CCDC34
CCDC38
CCDC40
CCDC47
CCDC50
CCDC51
CCDC57
CCDC6
CCDC61
CCDC66
CCDC69
CCDC7
CCDC71
CCDC71L
CCDC74A
CCDC74B
CCDC77
CCDC78
CCDC8
CCDC80
CCDC82
CCDC85A
CCDC85C
CCDC86
CCDC88A
CCDC88B
CCDC88C
CCDC9
CCDC90B
CCDC91
CCDC92
CCDC93
CCDC97
CCDC9B
CCKAR
CCL28
CCM2
CCN1
CCN2
CCN3
CCN4
CCN5
CCN6
CCNA2
CCNB1IP1
CCNB2
CCNC
CCND1
CCND2
CCND3
CCNDBP1
CCNF
CCNG1
CCNG2
CCNH
CCNI
CCNJ
CCNJL
CCNK
CCNL1
CCNL2
CCNT1
CCNT2
CCNY
CCNYL1
CCP110
CCPG1
CCS
CCSAP
CCSER2
CCT2
CCT3
CCT4
CCT5
CCT6A
CCT6B
CCT7
CCT8
CCZ1
CCZ1B
CD109
CD151
CD163L1
CD164
CD180
CD274
CD276
CD2AP
CD2BP2
CD302
CD36
CD44
CD46
CD47
CD48
CD55
CD58
CD59
CD63
CD68
CD70
CD72
CD81
CD82
CD9
CDA
CDADC1
CDAN1
CDC123
CDC14A
CDC14B
CDC16
CDC20
CDC23
CDC25A
CDC25B
CDC25C
CDC26
CDC27
CDC34
CDC37
CDC37L1
CDC40
CDC42
CDC42BPA
CDC42BPB
CDC42EP1
CDC42EP2
CDC42EP3
CDC42EP4
CDC42SE1
CDC42SE2
CDC45
CDC5L
CDC6
CDC7
CDC73
CDCA2
CDCA3
CDCA4
CDCA5
CDCA7
CDCA7L
CDCA8
CDCP1
CDH11
CDH13
CDH18
CDH2
CDH20
CDH24
CDH4
CDH6
CDH8
CDIN1
CDIP1
CDK1
CDK10
CDK11A
CDK11B
CDK13
CDK14
CDK15
CDK17
CDK18
CDK19
CDK20
CDK2AP1
CDK3
CDK4
CDK5RAP1
CDK5RAP2
CDK5RAP3
CDK6
CDK8
CDK9
CDKAL1
CDKL1
CDKL2
CDKL3
CDKN1A
CDKN1B
CDKN2A
CDKN2AIP
CDKN2B
CDKN2C
CDKN3
CDNF
CDON
CDPF1
CDR2
CDRT4
CDS1
CDS2
CDT1
CDV3
CDYL
CDYL2
CEACAM19
CEBPG
CEBPZ
CEBPZOS
CELF1
CELF2
CELSR1
CELSR2
CEMIP
CEMIP2
CENATAC
CEND1
CENPC
CENPE
CENPF
CENPJ
CENPK
CENPM
CENPO
CENPP
CENPQ
CENPS
CENPS-CORT
CENPU
CENPX
CEP104
CEP112
CEP120
CEP126
CEP128
CEP131
CEP135
CEP152
CEP162
CEP164
CEP170B
CEP19
CEP192
CEP250
CEP290
CEP295
CEP295NL
CEP350
CEP41
CEP43
CEP44
CEP55
CEP57
CEP57L1
CEP63
CEP68
CEP70
CEP72
CEP76
CEP78
CEP83
CEP85
CEP85L
CEP89
CEP95
CEP97
CEPT1
CERCAM
CERK
CERS2
CERS4
CERS5
CERS6
CERT1
CFAP20
CFAP20DC
CFAP210
CFAP251
CFAP263
CFAP298
CFAP298-TCP10L
CFAP299
CFAP300
CFAP36
CFAP410
CFAP418
CFAP44
CFAP45
CFAP53
CFAP54
CFAP57
CFAP58
CFAP68
CFAP69
CFAP96
CFAP97
CFAP99
CFDP1
CFH
CFHR3
CFI
CFL1
CFL2
CFLAR
CGAS
CGB7
CGNL1
CGREF1
CH25H
CHAC1
CHAF1A
CHAF1B
CHAMP1
CHCHD2
CHCHD3
CHCHD6
CHD1
CHD1L
CHD2
CHD4
CHD6
CHD8
CHD9
CHD9NB
CHDH
CHEK1
CHEK2
CHERP
CHFR
CHGB
CHI3L2
CHIC2
CHID1
CHKA
CHKB
CHML
CHMP1A
CHMP1B
CHMP2B
CHMP3
CHMP4A
CHMP4B
CHMP6
CHMP7
CHN1
CHODL
CHORDC1
CHP1
CHPF
CHPF2
CHPT1
CHRAC1
CHRM3
CHRNA10
CHRNA5
CHRNA9
CHRNB1
CHRNE
CHST10
CHST11
CHST12
CHST15
CHST2
CHST3
CHSY1
CHSY3
CHTF18
CHTF8
CHTOP
CHUK
CHURC1
CHURC1-FNTB
CIAO2A
CIAO3
CIAPIN1
CIB1
CIBAR1
CIC
CIITA
CILK1
CILP2
CIMAP1D
CIMIP2A
CINP
CIP2A
CIPC
CIR1
CISD1
CISD2
CISH
CIT
CITED2
CIZ1
CKAP2
CKAP2L
CKAP4
CKAP5
CKB
CKLF-CMTM1
CKS2
CLASP1
CLASP2
CLASRP
CLBA1
CLCA2
CLCC1
CLCN2
CLCN3
CLCN6
CLCN7
CLCNKB
CLDN1
CLDN11
CLDN12
CLDN15
CLDN23
CLDND1
CLEC11A
CLEC16A
CLEC18A
CLEC1A
CLEC2D
CLEC3B
CLEC4A
CLGN
CLHC1
CLIC4
CLIC6
CLINT1
CLIP1
CLIP2
CLIP3
CLIP4
CLK1
CLK3
CLK4
CLMP
CLN3
CLN6
CLNS1A
CLOCK
CLP1
CLPB
CLPP
CLPTM1
CLPX
CLSTN1
CLSTN2
CLSTN3
CLTA
CLTB
CLTC
CLTCL1
CLU
CLUAP1
CLVS1
CLYBL
CMAS
CMBL
CMC1
CMC2
CMIP
CMKLR1
CMKLR2
CMPK1
CMSS1
CMTM3
CMTM4
CMTM6
CMTM7
CMTM8
CMTR1
CMTR2
CMYA5
CNBP
CNDP2
CNEP1R1
CNIH1
CNIH3
CNIH4
CNKSR3
CNN1
CNN2
CNN3
CNNM2
CNOT1
CNOT10
CNOT11
CNOT2
CNOT4
CNOT6
CNOT6L
CNOT7
CNOT8
CNOT9
CNP
CNPPD1
CNPY2
CNPY3
CNPY3-GNMT
CNPY4
CNRIP1
CNST
CNTF
CNTLN
CNTN3
CNTNAP1
CNTNAP2
CNTNAP3
CNTNAP3B
CNTRL
CNTROB
COA1
COA4
COA5
COA6
COA7
COA8
COASY
COBLL1
COG1
COG2
COG3
COG4
COG5
COG6
COG7
COG8
COIL
COL11A1
COL12A1
COL13A1
COL14A1
COL15A1
COL16A1
COL18A1
COL19A1
COL1A1
COL1A2
COL21A1
COL23A1
COL24A1
COL25A1
COL27A1
COL3A1
COL4A1
COL4A2
COL4A3
COL4A4
COL5A1
COL5A2
COL5A3
COL6A1
COL6A2
COL6A3
COL7A1
COL8A1
COL9A2
COL9A3
COLEC12
COLGALT1
COLGALT2
COLQ
COMMD1
COMMD10
COMMD2
COMMD4
COMMD5
COMMD6
COMMD7
COMMD8
COMMD9
COMT
COP1
COPA
COPB1
COPB2
COPE
COPG1
COPG2
COPRS
COPS2
COPS3
COPS4
COPS5
COPS7A
COPS7B
COPS8
COPS9
COPZ1
COPZ2
COQ10B
COQ2
COQ3
COQ6
COQ7
COQ8A
COQ8B
COQ9
CORIN
CORO1B
CORO1C
CORO2A
CORO2B
CORO6
COTL1
COX10
COX11
COX14
COX15
COX16
COX17
COX18
COX19
COX20
COX6C
COX7A2
COX7A2L
COX7C
CPA4
CPA6
CPD
CPE
CPEB2
CPEB3
CPEB4
CPED1
CPLANE1
CPM
CPNE1
CPNE2
CPNE3
CPNE4
CPNE7
CPNE8
CPOX
CPPED1
CPQ
CPS1
CPSF1
CPSF2
CPSF3
CPSF4
CPSF6
CPSF7
CPT1A
CPT1C
CPT2
CPTP
CPXM2
CPZ
CR1L
CRACD
CRACR2A
CRACR2B
CRADD
CRAMP1
CRB1
CRBN
CRCP
CREB1
CREB3L1
CREB3L2
CREB5
CREBBP
CREBL2
CREBRF
CREBZF
CREG1
CREG2
CRELD1
CREM
CRIM1
CRIP1
CRIPT
CRISPLD2
CRK
CRKL
CRLF3
CRLS1
CRMP1
CRNKL1
CROCC
CROCC2
CROT
CRPPA
CRTAP
CRTC1
CRTC3
CRY1
CRY2
[truncated: 8,713 more rows]

## Sheet: AEI >80_20
chrom	start	stop	name (669 genes)	score	strand	paternal_counts	maternal_counts	total_reads	aei	sample	informative_reads_per_kb	binom_pval	fdr_pval	fdr_reject	70_percent_aei	80_percent_aei	90_percent_aei	95_percent_aei
chr3	184186198	184194005	ABCF3	0	+	15	16	31	-0.016129	acp6_c1_rnaAligned	3.9708	1	1	FALSE	FALSE	FALSE	FALSE	FALSE
chr3	184186198	184194005	ABCF3	0	+	20	4	24	0.333333	acp6_c2_rnaAligned	3.07416	0.00154388	0.0202871	TRUE	TRUE	TRUE	FALSE	FALSE
chr3	184186198	184194005	ABCF3	0	+	11	12	23	-0.0217391	acp6_c5_rnaAligned	2.94607	1	1	FALSE	FALSE	FALSE	FALSE	FALSE
chr3	184186198	184194005	ABCF3	0	+	14	18	32	-0.0625	acp6_c6_rnaAligned	4.09889	0.596615	0.923715	FALSE	FALSE	FALSE	FALSE	FALSE
chr3	184186198	184194005	ABCF3	0	+	46	39	85	0.0411765	acp7_c1_rnaAligned	10.8877	0.515426	0.896541	FALSE	FALSE	FALSE	FALSE	FALSE
chr3	184186198	184194005	ABCF3	0	+	31	26	57	0.0438596	acp7_c2_rnaAligned	7.30114	0.596642	0.922499	FALSE	FALSE	FALSE	FALSE	FALSE
chr3	184186198	184194005	ABCF3	0	+	36	24	60	0.1	acp7_c4_rnaAligned	7.68541	0.155002	0.524545	FALSE	FALSE	FALSE	FALSE	FALSE
chr3	132558140	132659809	ACAD11	0	-	74	68	142	0.0211268	acp6_c1_rnaAligned	1.39669	0.674935	0.957793	FALSE	FALSE	FALSE	FALSE	FALSE
chr3	132558140	132659809	ACAD11	0	-	90	93	183	-0.00819672	acp6_c2_rnaAligned	1.79996	0.882518	1	FALSE	FALSE	FALSE	FALSE	FALSE
chr3	132558140	132659809	ACAD11	0	-	53	60	113	-0.0309735	acp6_c5_rnaAligned	1.11145	0.572656	0.926586	FALSE	FALSE	FALSE	FALSE	FALSE
chr3	132558140	132659809	ACAD11	0	-	72	85	157	-0.0414013	acp6_c6_rnaAligned	1.54423	0.338235	0.745001	FALSE	FALSE	FALSE	FALSE	FALSE
chr3	132558140	132659809	ACAD11	0	-	7	5	12	0.0833333	acp7_c1_rnaAligned	0.11803	0.774414	1	FALSE	FALSE	FALSE	FALSE	FALSE
chr3	132558140	132659809	ACAD11	0	-	5	5	10	0	acp7_c2_rnaAligned	0.0983584	1	1	FALSE	FALSE	FALSE	FALSE	FALSE
chr3	132558140	132659809	ACAD11	0	-	12	1	13	0.423077	acp7_c4_rnaAligned	0.127866	0.00341797	0.0415024	TRUE	TRUE	TRUE	TRUE	FALSE
chr15	88803435	88875353	ACAN	0	+	241	87	328	0.234756	acp6_c1_rnaAligned	4.56075	7.15445e-18	5.3294e-16	TRUE	TRUE	FALSE	FALSE	FALSE
chr15	88803435	88875353	ACAN	0	+	357	226	583	0.11235	acp6_c2_rnaAligned	8.10645	6.44528e-08	2.34418e-06	TRUE	FALSE	FALSE	FALSE	FALSE
chr15	88803435	88875353	ACAN	0	+	278	121	399	0.196742	acp6_c5_rnaAligned	5.54799	2.503e-15	2.10548e-13	TRUE	FALSE	FALSE	FALSE	FALSE
chr15	88803435	88875353	ACAN	0	+	195	82	277	0.203971	acp6_c6_rnaAligned	3.85161	8.8011e-12	5.08495e-10	TRUE	TRUE	FALSE	FALSE	FALSE
chr15	88803435	88875353	ACAN	0	+	4	15	19	-0.289474	acp7_c1_rnaAligned	0.26419	0.0192108	0.157118	FALSE	TRUE	FALSE	FALSE	FALSE
chr15	88803435	88875353	ACAN	0	+	35	185	220	-0.340909	acp7_c2_rnaAligned	3.05904	7.82476e-26	1.17299e-23	TRUE	TRUE	TRUE	FALSE	FALSE
chr15	88803435	88875353	ACAN	0	+	3	18	21	-0.357143	acp7_c4_rnaAligned	0.291999	0.00148964	0.0212638	TRUE	TRUE	TRUE	FALSE	FALSE
chr1	54548227	54639192	ACOT11	0	+	7	14	21	-0.166667	acp6_c1_rnaAligned	0.230858	0.189247	0.548565	FALSE	FALSE	FALSE	FALSE	FALSE
chr1	54548227	54639192	ACOT11	0	+	9	3	12	0.25	acp6_c2_rnaAligned	0.131919	0.145996	0.475012	FALSE	TRUE	FALSE	FALSE	FALSE
chr1	54548227	54639192	ACOT11	0	+	15	5	20	0.25	acp6_c5_rnaAligned	0.219865	0.0413895	0.252801	FALSE	TRUE	FALSE	FALSE	FALSE
chr1	54548227	54639192	ACOT11	0	+	13	1	14	0.428571	acp6_c6_rnaAligned	0.153905	0.00183105	0.0248193	TRUE	TRUE	TRUE	TRUE	FALSE
chr1	54548227	54639192	ACOT11	0	+	7	6	13	0.0384615	acp7_c1_rnaAligned	0.142912	1	1	FALSE	FALSE	FALSE	FALSE	FALSE
chr7	149881359	150323545	ACTR3C	0	-	9	7	16	0.0625	acp6_c1_rnaAligned	0.0361839	0.803619	1	FALSE	FALSE	FALSE	FALSE	FALSE
chr7	149881359	150323545	ACTR3C	0	-	9	10	19	-0.0263158	acp6_c2_rnaAligned	0.0429683	1	1	FALSE	FALSE	FALSE	FALSE	FALSE
chr7	149881359	150323545	ACTR3C	0	-	4	17	21	-0.309524	acp6_c5_rnaAligned	0.0474913	0.00719738	0.0776091	FALSE	TRUE	TRUE	FALSE	FALSE
chr7	149881359	150323545	ACTR3C	0	-	9	8	17	0.0294118	acp6_c6_rnaAligned	0.0384454	1	1	FALSE	FALSE	FALSE	FALSE	FALSE
chr7	149881359	150323545	ACTR3C	0	-	13	29	42	-0.190476	acp7_c1_rnaAligned	0.0949827	0.0195205	0.159496	FALSE	FALSE	FALSE	FALSE	FALSE
chr7	149881359	150323545	ACTR3C	0	-	8	20	28	-0.214286	acp7_c2_rnaAligned	0.0633218	0.0356981	0.221268	FALSE	TRUE	FALSE	FALSE	FALSE
chr7	149881359	150323545	ACTR3C	0	-	6	24	30	-0.3	acp7_c4_rnaAligned	0.0678448	0.00143091	0.0207796	TRUE	TRUE	TRUE	FALSE	FALSE
chr22	17178789	17221848	ADA2	0	-	0	15	15	-0.5	acp6_c5_rnaAligned	0.348359	6.10352e-05	0.0016352	TRUE	TRUE	TRUE	TRUE	TRUE
chr22	17178789	17221848	ADA2	0	-	2	15	17	-0.382353	acp7_c1_rnaAligned	0.394807	0.00234985	0.0335511	TRUE	TRUE	TRUE	FALSE	FALSE
chr22	17178789	17221848	ADA2	0	-	3	8	11	-0.227273	acp7_c4_rnaAligned	0.255463	0.226562	0.633004	FALSE	TRUE	FALSE	FALSE	FALSE
chr2	206443531	206621127	ADAM23	0	+	18	1	19	0.447368	acp6_c1_rnaAligned	0.106984	7.62939e-05	0.00143073	TRUE	TRUE	TRUE	TRUE	FALSE
chr2	206443531	206621127	ADAM23	0	+	37	5	42	0.380952	acp6_c2_rnaAligned	0.236492	4.4337e-07	1.39202e-05	TRUE	TRUE	TRUE	FALSE	FALSE
chr2	206443531	206621127	ADAM23	0	+	35	2	37	0.445946	acp6_c5_rnaAligned	0.208338	1.02445e-08	5.27257e-07	TRUE	TRUE	TRUE	TRUE	FALSE
chr2	206443531	206621127	ADAM23	0	+	40	14	54	0.240741	acp6_c6_rnaAligned	0.304061	0.000535436	0.00915894	TRUE	TRUE	FALSE	FALSE	FALSE
chr2	206443531	206621127	ADAM23	0	+	65	20	85	0.264706	acp7_c1_rnaAligned	0.478614	1.02989e-06	3.99805e-05	TRUE	TRUE	FALSE	FALSE	FALSE
chr2	206443531	206621127	ADAM23	0	+	18	0	18	0.5	acp7_c2_rnaAligned	0.101354	7.62939e-06	0.000220571	TRUE	TRUE	TRUE	TRUE	TRUE
chr2	206443531	206621127	ADAM23	0	+	10	4	14	0.214286	acp7_c4_rnaAligned	0.0788306	0.179565	0.555239	FALSE	TRUE	FALSE	FALSE	FALSE
chr5	179110852	179345461	ADAMTS2	0	-	473	108	581	0.314114	acp6_c1_rnaAligned	2.47646	2.04282e-55	4.44174e-53	TRUE	TRUE	TRUE	FALSE	FALSE
chr5	179110852	179345461	ADAMTS2	0	-	625	149	774	0.307494	acp6_c2_rnaAligned	3.29911	4.34263e-70	1.17931e-67	TRUE	TRUE	TRUE	FALSE	FALSE
chr5	179110852	179345461	ADAMTS2	0	-	397	119	516	0.26938	acp6_c5_rnaAligned	2.1994	5.75509e-36	9.57916e-34	TRUE	TRUE	FALSE	FALSE	FALSE
chr5	179110852	179345461	ADAMTS2	0	-	643	342	985	0.152792	acp6_c6_rnaAligned	4.19847	5.72041e-22	6.56417e-20	TRUE	FALSE	FALSE	FALSE	FALSE
chr5	179110852	179345461	ADAMTS2	0	-	34	220	254	-0.366142	acp7_c1_rnaAligned	1.08265	1.58952e-34	3.61894e-32	TRUE	TRUE	TRUE	FALSE	FALSE
chr5	179110852	179345461	ADAMTS2	0	-	60	144	204	-0.205882	acp7_c2_rnaAligned	0.869532	3.76869e-09	1.77369e-07	TRUE	TRUE	FALSE	FALSE	FALSE
chr5	179110852	179345461	ADAMTS2	0	-	44	28	72	0.111111	acp7_c4_rnaAligned	0.306894	0.0763692	0.361342	FALSE	FALSE	FALSE	FALSE	FALSE
chr3	64515653	64688000	ADAMTS9	0	-	12	1	13	0.423077	acp6_c1_rnaAligned	0.0754292	0.00341797	0.0370088	TRUE	TRUE	TRUE	TRUE	FALSE
chr3	64515653	64688000	ADAMTS9	0	-	9	4	13	0.192308	acp6_c5_rnaAligned	0.0754292	0.266846	0.688501	FALSE	FALSE	FALSE	FALSE	FALSE
chr3	64515653	64688000	ADAMTS9	0	-	14	26	40	-0.15	acp7_c1_rnaAligned	0.23209	0.0806905	0.382304	FALSE	FALSE	FALSE	FALSE	FALSE
chr3	64515653	64688000	ADAMTS9	0	-	17	9	26	0.153846	acp7_c2_rnaAligned	0.150858	0.168638	0.534939	FALSE	FALSE	FALSE	FALSE	FALSE
chr3	64515653	64688000	ADAMTS9	0	-	38	30	68	0.0588235	acp7_c4_rnaAligned	0.394553	0.396125	0.800036	FALSE	FALSE	FALSE	FALSE	FALSE
chr2	70656783	70768200	ADD2	0	-	3	40	43	-0.430233	acp7_c1_rnaAligned	0.385938	3.02134e-09	1.66352e-07	TRUE	TRUE	TRUE	TRUE	FALSE
chr2	70656783	70768200	ADD2	0	-	12	2	14	0.357143	acp7_c2_rnaAligned	0.125654	0.0129395	0.110026	FALSE	TRUE	TRUE	FALSE	FALSE
chr2	70656783	70768200	ADD2	0	-	6	12	18	-0.166667	acp7_c4_rnaAligned	0.161555	0.237885	0.64156	FALSE	FALSE	FALSE	FALSE	FALSE
chr1	78889763	79006730	ADGRL4	0	-	118	99	217	0.0437788	acp6_c1_rnaAligned	1.85522	0.221651	0.597064	FALSE	FALSE	FALSE	FALSE	FALSE
chr1	78889763	79006730	ADGRL4	0	-	44	97	141	-0.187943	acp6_c2_rnaAligned	1.20547	9.47934e-06	0.000225813	TRUE	FALSE	FALSE	FALSE	FALSE
chr1	78889763	79006730	ADGRL4	0	-	13	59	72	-0.319444	acp6_c5_rnaAligned	0.615558	3.8086e-08	1.8506e-06	TRUE	TRUE	TRUE	FALSE	FALSE
chr1	78889763	79006730	ADGRL4	0	-	72	55	127	0.0669291	acp6_c6_rnaAligned	1.08578	0.1554	0.511928	FALSE	FALSE	FALSE	FALSE	FALSE
chr1	78889763	79006730	ADGRL4	0	-	81	46	127	0.137795	acp7_c1_rnaAligned	1.08578	0.00241755	0.0344011	TRUE	FALSE	FALSE	FALSE	FALSE
chr1	78889763	79006730	ADGRL4	0	-	83	51	134	0.119403	acp7_c2_rnaAligned	1.14562	0.00717812	0.0733401	FALSE	FALSE	FALSE	FALSE	FALSE
chr1	78889763	79006730	ADGRL4	0	-	1	10	11	-0.409091	acp7_c4_rnaAligned	0.0940436	0.0117188	0.104637	FALSE	TRUE	TRUE	TRUE	FALSE
chr5	90558796	91164437	ADGRV1	0	+	7	4	11	0.136364	acp7_c1_rnaAligned	0.0181626	0.548828	0.912979	FALSE	FALSE	FALSE	FALSE	FALSE
chr5	90558796	91164437	ADGRV1	0	+	14	2	16	0.375	acp7_c2_rnaAligned	0.0264183	0.00418091	0.048231	TRUE	TRUE	TRUE	FALSE	FALSE
chr5	90558796	91164437	ADGRV1	0	+	8	1	9	0.388889	acp7_c4_rnaAligned	0.0148603	0.0390625	0.240098	FALSE	TRUE	TRUE	FALSE	FALSE
chr10	45825593	45854690	AGAP4	0	-	26	8	34	0.264706	acp6_c1_rnaAligned	1.16851	0.00293506	0.0327043	TRUE	TRUE	FALSE	FALSE	FALSE
chr10	45825593	45854690	AGAP4	0	-	13	12	25	0.02	acp6_c2_rnaAligned	0.859195	1	1	FALSE	FALSE	FALSE	FALSE	FALSE
chr10	45825593	45854690	AGAP4	0	-	7	3	10	0.2	acp6_c5_rnaAligned	0.343678	0.34375	0.771025	FALSE	FALSE	FALSE	FALSE	FALSE
chr10	45825593	45854690	AGAP4	0	-	22	5	27	0.314815	acp6_c6_rnaAligned	0.927931	0.00151372	0.0216772	TRUE	TRUE	TRUE	FALSE	FALSE
chr10	45825593	45854690	AGAP4	0	-	12	0	12	0.5	acp7_c1_rnaAligned	0.412414	0.000488281	0.00924333	TRUE	TRUE	TRUE	TRUE	TRUE
chr10	49988405	50010499	AGAP6	0	+	21	11	32	0.15625	acp6_c1_rnaAligned	1.44836	0.110184	0.406434	FALSE	FALSE	FALSE	FALSE	FALSE
chr10	49988405	50010499	AGAP6	0	+	25	29	54	-0.037037	acp6_c2_rnaAligned	2.4441	0.683489	0.966231	FALSE	FALSE	FALSE	FALSE	FALSE
chr10	49988405	50010499	AGAP6	0	+	14	24	38	-0.131579	acp6_c5_rnaAligned	1.71992	0.143307	0.511537	FALSE	FALSE	FALSE	FALSE	FALSE
chr10	49988405	50010499	AGAP6	0	+	36	29	65	0.0538462	acp6_c6_rnaAligned	2.94198	0.457021	0.837973	FALSE	FALSE	FALSE	FALSE	FALSE
chr10	49988405	50010499	AGAP6	0	+	64	27	91	0.203297	acp7_c1_rnaAligned	4.11877	0.000132163	0.00310123	TRUE	TRUE	FALSE	FALSE	FALSE
chr10	49988405	50010499	AGAP6	0	+	25	12	37	0.175676	acp7_c2_rnaAligned	1.67466	0.047031	0.263289	FALSE	FALSE	FALSE	FALSE	FALSE
chr10	49988405	50010499	AGAP6	0	+	28	7	35	0.3	acp7_c4_rnaAligned	1.58414	0.00050826	0.00889114	TRUE	TRUE	TRUE	FALSE	FALSE
chr7	141551409	141655244	AGK	0	+	13	15	28	-0.0357143	acp6_c1_rnaAligned	0.269659	0.850554	1	FALSE	FALSE	FALSE	FALSE	FALSE
chr7	141551409	141655244	AGK	0	+	9	26	35	-0.242857	acp6_c2_rnaAligned	0.337073	0.00598812	0.0580086	FALSE	TRUE	FALSE	FALSE	FALSE
chr7	141551409	141655244	AGK	0	+	23	5	28	0.321429	acp6_c5_rnaAligned	0.269659	0.000912234	0.0150557	TRUE	TRUE	TRUE	FALSE	FALSE
chr7	141551409	141655244	AGK	0	+	19	6	25	0.26	acp6_c6_rnaAligned	0.240767	0.0146333	0.12188	FALSE	TRUE	FALSE	FALSE	FALSE
chr7	141551409	141655244	AGK	0	+	14	1	15	0.433333	acp7_c1_rnaAligned	0.14446	0.000976562	0.0164203	TRUE	TRUE	TRUE	TRUE	FALSE
chr7	141551409	141655244	AGK	0	+	8	2	10	0.3	acp7_c2_rnaAligned	0.0963066	0.109375	0.429593	FALSE	TRUE	TRUE	FALSE	FALSE
chr4	106315543	106349456	AIMP1	0	+	1	12	13	-0.423077	acp6_c1_rnaAligned	0.383334	0.00341797	0.0370088	TRUE	TRUE	TRUE	TRUE	FALSE
chr4	106315543	106349456	AIMP1	0	+	5	13	18	-0.222222	acp6_c2_rnaAligned	0.53077	0.0962524	0.377185	FALSE	TRUE	FALSE	FALSE	FALSE
chr4	106315543	106349456	AIMP1	0	+	2	14	16	-0.375	acp6_c5_rnaAligned	0.471795	0.00418091	0.0515887	FALSE	TRUE	TRUE	FALSE	FALSE
chr4	106315543	106349456	AIMP1	0	+	4	21	25	-0.34	acp6_c6_rnaAligned	0.73718	0.000910521	0.0145373	TRUE	TRUE	TRUE	FALSE	FALSE
chr4	106315543	106349456	AIMP1	0	+	3	6	9	-0.166667	acp7_c2_rnaAligned	0.265385	0.507812	0.872028	FALSE	FALSE	FALSE	FALSE	FALSE
chr4	106315543	106349456	AIMP1	0	+	7	7	14	0	acp7_c4_rnaAligned	0.412821	1	1	FALSE	FALSE	FALSE	FALSE	FALSE
chr1	33007939	33036883	AK2	0	-	1023	14	1037	0.4865	acp6_c1_rnaAligned	35.8278	2.40499e-281	1.93482e-278	TRUE	TRUE	TRUE	TRUE	TRUE
chr1	33007939	33036883	AK2	0	-	863	17	880	0.480682	acp6_c2_rnaAligned	30.4035	6.93185e-230	9.41229e-227	TRUE	TRUE	TRUE	TRUE	TRUE
chr1	33007939	33036883	AK2	0	-	910	4	914	0.495624	acp6_c5_rnaAligned	31.5782	4.19027e-265	5.46341e-262	TRUE	TRUE	TRUE	TRUE	TRUE
chr1	33007939	33036883	AK2	0	-	801	7	808	0.491337	acp6_c6_rnaAligned	27.916	5.13721e-227	6.06337e-224	TRUE	TRUE	TRUE	TRUE	TRUE
chr1	33007939	33036883	AK2	0	-	235	3334	3569	-0.434155	acp7_c1_rnaAligned	123.307	0	0	TRUE	TRUE	TRUE	TRUE	FALSE
chr1	33007939	33036883	AK2	0	-	137	2129	2266	-0.439541	acp7_c2_rnaAligned	78.2891	0	0	TRUE	TRUE	TRUE	TRUE	FALSE
chr1	33007939	33036883	AK2	0	-	187	2625	2812	-0.433499	acp7_c4_rnaAligned	97.1531	0	0	TRUE	TRUE	TRUE	TRUE	FALSE
chr10	4987774	5018000	AKR1C2	0	-	17	2	19	0.394737	acp6_c1_rnaAligned	0.628598	0.000728607	0.0100028	TRUE	TRUE	TRUE	FALSE	FALSE
chr10	4987774	5018000	AKR1C2	0	-	12	13	25	-0.02	acp6_c2_rnaAligned	0.827102	1	1	FALSE	FALSE	FALSE	FALSE	FALSE
chr10	4987774	5018000	AKR1C2	0	-	33	10	43	0.267442	acp6_c5_rnaAligned	1.42262	0.000606107	0.0109759	TRUE	TRUE	FALSE	FALSE	FALSE
chr10	4987774	5018000	AKR1C2	0	-	49	35	84	0.0833333	acp6_c6_rnaAligned	2.77906	0.155656	0.511956	FALSE	FALSE	FALSE	FALSE	FALSE
chr10	4987774	5018000	AKR1C2	0	-	9	5	14	0.142857	acp7_c1_rnaAligned	0.463177	0.42395	0.836713	FALSE	FALSE	FALSE	FALSE	FALSE
chr10	4987774	5018000	AKR1C2	0	-	6	5	11	0.0454545	acp7_c2_rnaAligned	0.363925	1	1	FALSE	FALSE	FALSE	FALSE	FALSE
chr10	4987774	5018000	AKR1C2	0	-	6	11	17	-0.147059	acp7_c4_rnaAligned	0.56243	0.332306	0.741168	FALSE	FALSE	FALSE	FALSE	FALSE
chr10	4824972	4854429	AKR1E2	0	+	9	39	48	-0.3125	acp6_c1_rnaAligned	1.62949	1.52218e-05	0.000340047	TRUE	TRUE	TRUE	FALSE	FALSE
chr10	4824972	4854429	AKR1E2	0	+	9	45	54	-0.333333	acp6_c2_rnaAligned	1.83318	7.28843e-07	2.16144e-05	TRUE	TRUE	TRUE	FALSE	FALSE
chr10	4824972	4854429	AKR1E2	0	+	14	34	48	-0.208333	acp6_c5_rnaAligned	1.62949	0.0055152	0.0643785	FALSE	TRUE	FALSE	FALSE	FALSE
chr10	4824972	4854429	AKR1E2	0	+	21	27	48	-0.0625	acp6_c6_rnaAligned	1.62949	0.470879	0.847582	FALSE	FALSE	FALSE	FALSE	FALSE
chr10	4824972	4854429	AKR1E2	0	+	12	14	26	-0.0384615	acp7_c1_rnaAligned	0.882642	0.845019	1	FALSE	FALSE	FALSE	FALSE	FALSE
chr10	4824972	4854429	AKR1E2	0	+	51	8	59	0.364407	acp7_c2_rnaAligned	2.00292	9.05239e-09	4.04857e-07	TRUE	TRUE	TRUE	FALSE	FALSE
chr10	4824972	4854429	AKR1E2	0	+	12	11	23	0.0217391	acp7_c4_rnaAligned	0.780799	1	1	FALSE	FALSE	FALSE	FALSE	FALSE
chr17	19737983	19748298	ALDH3A1	0	-	19	4	23	0.326087	acp7_c1_rnaAligned	2.22976	0.00259948	0.0361353	TRUE	TRUE	TRUE	FALSE	FALSE
chr17	19737983	19748298	ALDH3A1	0	-	7	1	8	0.375	acp7_c2_rnaAligned	0.77557	0.0703125	0.334812	FALSE	TRUE	TRUE	FALSE	FALSE
chr17	19737983	19748298	ALDH3A1	0	-	9	16	25	-0.14	acp7_c4_rnaAligned	2.42365	0.229523	0.633004	FALSE	FALSE	FALSE	FALSE	FALSE
chr14	77672403	77708023	ALKBH1	0	-	9	22	31	-0.209677	acp6_c1_rnaAligned	0.870298	0.0294494	0.179121	FALSE	TRUE	FALSE	FALSE	FALSE
chr14	77672403	77708023	ALKBH1	0	-	14	25	39	-0.141026	acp6_c2_rnaAligned	1.09489	0.108129	0.405104	FALSE	FALSE	FALSE	FALSE	FALSE
chr14	77672403	77708023	ALKBH1	0	-	1	14	15	-0.433333	acp6_c5_rnaAligned	0.421112	0.000976562	0.0156872	TRUE	TRUE	TRUE	TRUE	FALSE
chr14	77672403	77708023	ALKBH1	0	-	19	14	33	0.0757576	acp6_c6_rnaAligned	0.926446	0.48685	0.856732	FALSE	FALSE	FALSE	FALSE	FALSE
chr14	77672403	77708023	ALKBH1	0	-	52	77	129	-0.0968992	acp7_c1_rnaAligned	3.62156	0.0341867	0.227659	FALSE	FALSE	FALSE	FALSE	FALSE
chr14	77672403	77708023	ALKBH1	0	-	33	24	57	0.0789474	acp7_c2_rnaAligned	1.60022	0.289244	0.678282	FALSE	FALSE	FALSE	FALSE	FALSE
chr14	77672403	77708023	ALKBH1	0	-	18	63	81	-0.277778	acp7_c4_rnaAligned	2.274	5.2044e-07	1.89292e-05	TRUE	TRUE	FALSE	FALSE	FALSE
chr15	84817355	84873479	ALPK3	0	+	8	11	19	-0.0789474	acp7_c1_rnaAligned	0.338536	0.647606	0.968477	FALSE	FALSE	FALSE	FALSE	FALSE
chr15	84817355	84873479	ALPK3	0	+	7	6	13	0.0384615	acp7_c2_rnaAligned	0.23163	1	1	FALSE	FALSE	FALSE	FALSE	FALSE
chr15	84817355	84873479	ALPK3	0	+	23	2	25	0.42	acp7_c4_rnaAligned	0.445442	1.94311e-05	0.000515282	TRUE	TRUE	TRUE	TRUE	FALSE
chr1	21508983	21578410	ALPL	0	+	44	5	49	0.397959	acp6_c1_rnaAligned	0.705777	7.59716e-09	2.93842e-07	TRUE	TRUE	TRUE	FALSE	FALSE
chr1	21508983	21578410	ALPL	0	+	48	6	54	0.388889	acp6_c2_rnaAligned	0.777795	3.25653e-09	1.39637e-07	TRUE	TRUE	TRUE	FALSE	FALSE
chr1	21508983	21578410	ALPL	0	+	11	2	13	0.346154	acp6_c5_rnaAligned	0.187247	0.0224609	0.172282	FALSE	TRUE	TRUE	FALSE	FALSE
chr1	21508983	21578410	ALPL	0	+	272	25	297	0.415825	acp6_c6_rnaAligned	4.27787	1.29909e-53	2.8245e-51	TRUE	TRUE	TRUE	TRUE	FALSE
chr1	21508983	21578410	ALPL	0	+	6	11	17	-0.147059	acp7_c1_rnaAligned	0.244862	0.332306	0.760692	FALSE	FALSE	FALSE	FALSE	FALSE
chr1	21508983	21578410	ALPL	0	+	3	6	9	-0.166667	acp7_c2_rnaAligned	0.129633	0.507812	0.872028	FALSE	FALSE	FALSE	FALSE	FALSE
chr8	107249481	107497918	ANGPT1	0	-	4	36	40	-0.4	acp6_c1_rnaAligned	0.161007	1.85702e-07	5.9759e-06	TRUE	TRUE	TRUE	TRUE	FALSE
chr8	107249481	107497918	ANGPT1	0	-	66	69	135	-0.0111111	acp6_c2_rnaAligned	0.543397	0.863415	1	FALSE	FALSE	FALSE	FALSE	FALSE
chr8	107249481	107497918	ANGPT1	0	-	49	19	68	0.220588	acp6_c5_rnaAligned	0.273711	0.000357955	0.0072609	TRUE	TRUE	FALSE	FALSE	FALSE
chr8	107249481	107497918	ANGPT1	0	-	19	28	47	-0.0957447	acp6_c6_rnaAligned	0.189183	0.24296	0.643649	FALSE	FALSE	FALSE	FALSE	FALSE
chr8	107249481	107497918	ANGPT1	0	-	165	153	318	0.0188679	acp7_c1_rnaAligned	1.28	0.537401	0.912979	FALSE	FALSE	FALSE	FALSE	FALSE
chr8	107249481	107497918	ANGPT1	0	-	159	184	343	-0.0364431	acp7_c2_rnaAligned	1.38063	0.194944	0.571144	FALSE	FALSE	FALSE	FALSE	FALSE
chr4	112705621	113383736	ANK2	0	+	48	33	81	0.0925926	acp6_c1_rnaAligned	0.119449	0.119274	0.423458	FALSE	FALSE	FALSE	FALSE	FALSE
chr4	112705621	113383736	ANK2	0	+	132	112	244	0.0409836	acp6_c2_rnaAligned	0.359821	0.223776	0.59483	FALSE	FALSE	FALSE	FALSE	FALSE
chr4	112705621	113383736	ANK2	0	+	47	42	89	0.0280899	acp6_c5_rnaAligned	0.131246	0.671809	0.969046	FALSE	FALSE	FALSE	FALSE	FALSE
chr4	112705621	113383736	ANK2	0	+	76	82	158	-0.0189873	acp6_c6_rnaAligned	0.232999	0.690925	0.966579	FALSE	FALSE	FALSE	FALSE	FALSE
chr4	112705621	113383736	ANK2	0	+	118	123	241	-0.0103734	acp7_c1_rnaAligned	0.355397	0.796732	1	FALSE	FALSE	FALSE	FALSE	FALSE
chr4	112705621	113383736	ANK2	0	+	52	36	88	0.0909091	acp7_c2_rnaAligned	0.129771	0.109295	0.429593	FALSE	FALSE	FALSE	FALSE	FALSE
chr4	112705621	113383736	ANK2	0	+	3	19	22	-0.363636	acp7_c4_rnaAligned	0.0324429	0.000855446	0.0140431	TRUE	TRUE	TRUE	FALSE	FALSE
chr3	15667235	15859814	ANKRD28	0	-	16	53	69	-0.268116	acp6_c1_rnaAligned	0.358295	9.09506e-06	0.000213947	TRUE	TRUE	FALSE	FALSE	FALSE
chr3	15667235	15859814	ANKRD28	0	-	28	86	114	-0.254386	acp6_c2_rnaAligned	0.591965	4.84213e-08	1.83352e-06	TRUE	TRUE	FALSE	FALSE	FALSE
chr3	15667235	15859814	ANKRD28	0	-	12	38	50	-0.26	acp6_c5_rnaAligned	0.259634	0.000305864	0.00634688	TRUE	TRUE	FALSE	FALSE	FALSE
chr3	15667235	15859814	ANKRD28	0	-	10	63	73	-0.363014	acp6_c6_rnaAligned	0.379065	1.5536e-10	8.12393e-09	TRUE	TRUE	TRUE	FALSE	FALSE
chr3	15667235	15859814	ANKRD28	0	-	519	598	1117	-0.0353626	acp7_c1_rnaAligned	5.80022	0.0195644	0.1597	FALSE	FALSE	FALSE	FALSE	FALSE
chr3	15667235	15859814	ANKRD28	0	-	611	741	1352	-0.0480769	acp7_c2_rnaAligned	7.0205	0.000446776	0.00809094	TRUE	FALSE	FALSE	FALSE	FALSE
chr3	15667235	15859814	ANKRD28	0	-	431	582	1013	-0.0745311	acp7_c4_rnaAligned	5.26018	2.34491e-06	7.49708e-05	TRUE	FALSE	FALSE	FALSE	FALSE
chr15	28885973	29118315	APBA2	0	+	15	0	15	0.5	acp6_c2_rnaAligned	0.06456	6.10352e-05	0.00125569	TRUE	TRUE	TRUE	TRUE	TRUE
chr15	28885973	29118315	APBA2	0	+	24	4	28	0.357143	acp6_c5_rnaAligned	0.120512	0.000179991	0.0041326	TRUE	TRUE	TRUE	FALSE	FALSE
chr15	28885973	29118315	APBA2	0	+	6	3	9	0.166667	acp7_c1_rnaAligned	0.038736	0.507812	0.891397	FALSE	FALSE	FALSE	FALSE	FALSE
chr10	26438340	26567803	APBB1IP	0	+	42	14	56	0.25	acp6_c2_rnaAligned	0.432556	0.000234446	0.00405527	TRUE	TRUE	FALSE	FALSE	FALSE
chr10	26438340	26567803	APBB1IP	0	+	54	35	89	0.106742	acp7_c1_rnaAligned	0.687455	0.0557783	0.311383	FALSE	FALSE	FALSE	FALSE	FALSE
chr10	26438340	26567803	APBB1IP	0	+	66	8	74	0.391892	acp7_c2_rnaAligned	0.571592	1.80774e-12	1.21947e-10	TRUE	TRUE	TRUE	FALSE	FALSE
chr10	26438340	26567803	APBB1IP	0	+	89	2	91	0.478022	acp7_c4_rnaAligned	0.702904	3.38223e-24	4.70486e-22	TRUE	TRUE	TRUE	TRUE	TRUE
chr3	49673116	49683971	APEH	0	+	12	0	12	0.5	acp6_c1_rnaAligned	1.10548	0.000488281	0.00703983	TRUE	TRUE	TRUE	TRUE	TRUE
chr3	49673116	49683971	APEH	0	+	7	3	10	0.2	acp6_c2_rnaAligned	0.921234	0.34375	0.733123	FALSE	FALSE	FALSE	FALSE	FALSE
chr3	49673116	49683971	APEH	0	+	9	14	23	-0.108696	acp6_c6_rnaAligned	2.11884	0.404873	0.797326	FALSE	FALSE	FALSE	FALSE	FALSE
chr3	49673116	49683971	APEH	0	+	5	4	9	0.0555556	acp7_c2_rnaAligned	0.829111	1	1	FALSE	FALSE	FALSE	FALSE	FALSE
chr3	49673116	49683971	APEH	0	+	6	5	11	0.0454545	acp7_c4_rnaAligned	1.01336	1	1	FALSE	FALSE	FALSE	FALSE	FALSE
chr22	38982346	38992779	APOBEC3B	0	+	12	2	14	0.357143	acp6_c1_rnaAligned	1.3419	0.0129395	0.0988584	FALSE	TRUE	TRUE	FALSE	FALSE
chr22	38982346	38992779	APOBEC3B	0	+	14	2	16	0.375	acp6_c2_rnaAligned	1.5336	0.00418091	0.0442937	TRUE	TRUE	TRUE	FALSE	FALSE
chr22	38982346	38992779	APOBEC3B	0	+	13	0	13	0.5	acp6_c5_rnaAligned	1.24605	0.000244141	0.00532568	TRUE	TRUE	TRUE	TRUE	TRUE
chr22	38982346	38992779	APOBEC3B	0	+	16	9	25	0.14	acp7_c1_rnaAligned	2.39624	0.229523	0.643857	FALSE	FALSE	FALSE	FALSE	FALSE
chr22	38982346	38992779	APOBEC3B	0	+	25	16	41	0.109756	acp7_c2_rnaAligned	3.92984	0.211024	0.591447	FALSE	FALSE	FALSE	FALSE	FALSE
chr22	38982346	38992779	APOBEC3B	0	+	29	28	57	0.00877193	acp7_c4_rnaAligned	5.46343	1	1	FALSE	FALSE	FALSE	FALSE	FALSE
chr22	36253132	36267525	APOL1	0	+	10	42	52	-0.307692	acp6_c1_rnaAligned	3.61287	9.06327e-06	0.000213824	TRUE	TRUE	TRUE	FALSE	FALSE
chr22	36253132	36267525	APOL1	0	+	12	6	18	0.166667	acp6_c2_rnaAligned	1.25061	0.237885	0.608683	FALSE	FALSE	FALSE	FALSE	FALSE
chr22	36253132	36267525	APOL1	0	+	3	22	25	-0.38	acp6_c5_rnaAligned	1.73696	0.000156522	0.00365582	TRUE	TRUE	TRUE	FALSE	FALSE
chr22	36253132	36267525	APOL1	0	+	27	47	74	-0.135135	acp6_c6_rnaAligned	5.14139	0.0265168	0.176972	FALSE	FALSE	FALSE	FALSE	FALSE
chr22	36253132	36267525	APOL1	0	+	8	24	32	-0.25	acp7_c1_rnaAligned	2.2233	0.00700037	0.0762886	FALSE	TRUE	FALSE	FALSE	FALSE
chr22	36253132	36267525	APOL1	0	+	6	4	10	0.1	acp7_c2_rnaAligned	0.694782	0.753906	0.997646	FALSE	FALSE	FALSE	FALSE	FALSE
chr22	36253132	36267525	APOL1	0	+	26	2	28	0.428571	acp7_c4_rnaAligned	1.94539	3.03239e-06	9.50347e-05	TRUE	TRUE	TRUE	TRUE	FALSE
chr4	36049786	36244784	ARAP2	0	-	29	13	42	0.190476	acp6_c1_rnaAligned	0.215387	0.0195205	0.135732	FALSE	FALSE	FALSE	FALSE	FALSE
chr4	36049786	36244784	ARAP2	0	-	19	2	21	0.404762	acp6_c2_rnaAligned	0.107693	0.000221252	0.00387644	TRUE	TRUE	TRUE	TRUE	FALSE
chr4	36049786	36244784	ARAP2	0	-	12	2	14	0.357143	acp6_c5_rnaAligned	0.0717956	0.0129395	0.117567	FALSE	TRUE	TRUE	FALSE	FALSE
chr4	36049786	36244784	ARAP2	0	-	19	6	25	0.26	acp6_c6_rnaAligned	0.128206	0.0146333	0.12188	FALSE	TRUE	FALSE	FALSE	FALSE
chr4	36049786	36244784	ARAP2	0	-	8	23	31	-0.241935	acp7_c1_rnaAligned	0.158976	0.0106738	0.103115	FALSE	TRUE	FALSE	FALSE	FALSE
chr4	36049786	36244784	ARAP2	0	-	7	5	12	0.0833333	acp7_c2_rnaAligned	0.0615391	0.774414	1	FALSE	FALSE	FALSE	FALSE	FALSE
chr4	36049786	36244784	ARAP2	0	-	9	13	22	-0.0909091	acp7_c4_rnaAligned	0.112822	0.523467	0.891254	FALSE	FALSE	FALSE	FALSE	FALSE
chr14	74661255	74713080	AREL1	0	-	65	0	65	0.5	acp6_c1_rnaAligned	1.25422	5.42101e-20	4.49609e-18	TRUE	TRUE	TRUE	TRUE	TRUE
chr14	74661255	74713080	AREL1	0	-	60	0	60	0.5	acp6_c2_rnaAligned	1.15774	1.73472e-18	1.42755e-16	TRUE	TRUE	TRUE	TRUE	TRUE
chr14	74661255	74713080	AREL1	0	-	46	0	46	0.5	acp6_c5_rnaAligned	0.887603	2.84217e-14	2.24589e-12	TRUE	TRUE	TRUE	TRUE	TRUE
chr14	74661255	74713080	AREL1	0	-	57	0	57	0.5	acp6_c6_rnaAligned	1.09986	1.38778e-17	1.23288e-15	TRUE	TRUE	TRUE	TRUE	TRUE
chr14	74661255	74713080	AREL1	0	-	66	92	158	-0.0822785	acp7_c1_rnaAligned	3.04872	0.0463694	0.274116	FALSE	FALSE	FALSE	FALSE	FALSE
chr14	74661255	74713080	AREL1	0	-	33	58	91	-0.137363	acp7_c2_rnaAligned	1.75591	0.0114563	0.101799	FALSE	FALSE	FALSE	FALSE	FALSE
chr14	74661255	74713080	AREL1	0	-	48	63	111	-0.0675676	acp7_c4_rnaAligned	2.14182	0.183657	0.56481	FALSE	FALSE	FALSE	FALSE	FALSE
chr18	6729715	6915716	ARHGAP28	0	+	147	187	334	-0.0598802	acp6_c1_rnaAligned	1.79569	0.0326888	0.193085	FALSE	FALSE	FALSE	FALSE	FALSE
chr18	6729715	6915716	ARHGAP28	0	+	98	118	216	-0.0462963	acp6_c2_rnaAligned	1.16128	0.19597	0.553411	FALSE	FALSE	FALSE	FALSE	FALSE
chr18	6729715	6915716	ARHGAP28	0	+	67	100	167	-0.0988024	acp6_c5_rnaAligned	0.897845	0.0130407	0.11835	FALSE	FALSE	FALSE	FALSE	FALSE
chr18	6729715	6915716	ARHGAP28	0	+	131	130	261	0.00191571	acp6_c6_rnaAligned	1.40322	1	1	FALSE	FALSE	FALSE	FALSE	FALSE
chr18	6729715	6915716	ARHGAP28	0	+	22	21	43	0.0116279	acp7_c1_rnaAligned	0.231182	1	1	FALSE	FALSE	FALSE	FALSE	FALSE
chr18	6729715	6915716	ARHGAP28	0	+	9	57	66	-0.363636	acp7_c2_rnaAligned	0.354837	1.18278e-09	5.8382e-08	TRUE	TRUE	TRUE	FALSE	FALSE
chr18	6729715	6915716	ARHGAP28	0	+	6	10	16	-0.125	acp7_c4_rnaAligned	0.086021	0.454498	0.846937	FALSE	FALSE	FALSE	FALSE	FALSE
chr7	144355401	144380632	ARHGEF5	0	+	3	16	19	-0.342105	acp6_c1_rnaAligned	0.753042	0.00442505	0.0445551	TRUE	TRUE	TRUE	FALSE	FALSE
chr7	144355401	144380632	ARHGEF5	0	+	4	14	18	-0.277778	acp6_c2_rnaAligned	0.713408	0.0308838	0.183523	FALSE	TRUE	FALSE	FALSE	FALSE
chr7	144355401	144380632	ARHGEF5	0	+	5	10	15	-0.166667	acp6_c6_rnaAligned	0.594507	0.301758	0.708429	FALSE	FALSE	FALSE	FALSE	FALSE
chr6	151452465	151470101	ARMT1	0	+	0	10	10	-0.5	acp6_c1_rnaAligned	0.567022	0.00195312	0.0235223	TRUE	TRUE	TRUE	TRUE	TRUE
chr6	151452465	151470101	ARMT1	0	+	0	12	12	-0.5	acp6_c2_rnaAligned	0.680426	0.000488281	0.00749113	TRUE	TRUE	TRUE	TRUE	TRUE
chr6	151452465	151470101	ARMT1	0	+	25	17	42	0.0952381	acp7_c1_rnaAligned	2.38149	0.279956	0.714066	FALSE	FALSE	FALSE	FALSE	FALSE
chr6	151452465	151470101	ARMT1	0	+	27	32	59	-0.0423729	acp7_c2_rnaAligned	3.34543	0.602923	0.925913	FALSE	FALSE	FALSE	FALSE	FALSE
chr6	151452465	151470101	ARMT1	0	+	37	45	82	-0.0487805	acp7_c4_rnaAligned	4.64958	0.439705	0.838284	FALSE	FALSE	FALSE	FALSE	FALSE
chr10	102869469	102901899	AS3MT	0	+	20	9	29	0.189655	acp6_c1_rnaAligned	0.894234	0.0614283	0.290018	FALSE	FALSE	FALSE	FALSE	FALSE
chr10	102869469	102901899	AS3MT	0	+	7	13	20	-0.15	acp6_c2_rnaAligned	0.616713	0.263176	0.645617	FALSE	FALSE	FALSE	FALSE	FALSE
chr10	102869469	102901899	AS3MT	0	+	19	3	22	0.363636	acp6_c5_rnaAligned	0.678384	0.000855446	0.014269	TRUE	TRUE	TRUE	FALSE	FALSE
chr10	102869469	102901899	AS3MT	0	+	17	8	25	0.18	acp6_c6_rnaAligned	0.770891	0.107752	0.424252	FALSE	FALSE	FALSE	FALSE	FALSE
chr10	102869469	102901899	AS3MT	0	+	7	25	32	-0.28125	acp7_c1_rnaAligned	0.986741	0.0021024	0.0309626	TRUE	TRUE	FALSE	FALSE	FALSE
chr10	102869469	102901899	AS3MT	0	+	10	26	36	-0.222222	acp7_c2_rnaAligned	1.11008	0.011331	0.101141	FALSE	TRUE	FALSE	FALSE	FALSE
chr10	102869469	102901899	AS3MT	0	+	15	37	52	-0.211538	acp7_c4_rnaAligned	1.60345	0.00318525	0.0395047	TRUE	TRUE	FALSE	FALSE	FALSE
chr18	33578218	33751195	ASXL3	0	+	1	12	13	-0.423077	acp6_c1_rnaAligned	0.0751545	0.00341797	0.0370088	TRUE	TRUE	TRUE	TRUE	FALSE
chr18	33578218	33751195	ASXL3	0	+	18	8	26	0.192308	acp6_c2_rnaAligned	0.150309	0.0755187	0.327784	FALSE	FALSE	FALSE	FALSE	FALSE
chr18	33578218	33751195	ASXL3	0	+	2	8	10	-0.3	acp6_c5_rnaAligned	0.0578112	0.109375	0.439241	FALSE	TRUE	TRUE	FALSE	FALSE
chr18	33578218	33751195	ASXL3	0	+	7	15	22	-0.181818	acp6_c6_rnaAligned	0.127185	0.133801	0.475086	FALSE	FALSE	FALSE	FALSE	FALSE
chr18	33578218	33751195	ASXL3	0	+	7	1	8	0.375	acp7_c1_rnaAligned	0.0462489	0.0703125	0.353408	FALSE	TRUE	TRUE	FALSE	FALSE
chr14	50533081	50633068	ATL1	0	+	20	26	46	-0.0652174	acp6_c1_rnaAligned	0.46006	0.461391	0.822124	FALSE	FALSE	FALSE	FALSE	FALSE
chr14	50533081	50633068	ATL1	0	+	25	23	48	0.0208333	acp6_c2_rnaAligned	0.480062	0.885433	1	FALSE	FALSE	FALSE	FALSE	FALSE
chr14	50533081	50633068	ATL1	0	+	15	16	31	-0.016129	acp6_c5_rnaAligned	0.31004	1	1	FALSE	FALSE	FALSE	FALSE	FALSE
chr14	50533081	50633068	ATL1	0	+	22	29	51	-0.0686275	acp6_c6_rnaAligned	0.510066	0.401062	0.797326	FALSE	FALSE	FALSE	FALSE	FALSE
chr14	50533081	50633068	ATL1	0	+	14	2	16	0.375	acp7_c2_rnaAligned	0.160021	0.00418091	0.048231	TRUE	TRUE	TRUE	FALSE	FALSE
chr3	194402676	194494334	ATP13A3	0	-	8	28	36	-0.277778	acp6_c1_rnaAligned	0.392764	0.00119324	0.0154827	TRUE	TRUE	FALSE	FALSE	FALSE
chr3	194402676	194494334	ATP13A3	0	-	15	57	72	-0.291667	acp6_c2_rnaAligned	0.785529	6.53997e-07	1.96609e-05	TRUE	TRUE	FALSE	FALSE	FALSE
chr3	194402676	194494334	ATP13A3	0	-	11	17	28	-0.107143	acp6_c5_rnaAligned	0.305483	0.344928	0.771025	FALSE	FALSE	FALSE	FALSE	FALSE
chr3	194402676	194494334	ATP13A3	0	-	13	52	65	-0.3	acp6_c6_rnaAligned	0.709158	1.16881e-06	3.65785e-05	TRUE	TRUE	TRUE	FALSE	FALSE
chr3	194402676	194494334	ATP13A3	0	-	22	20	42	0.0238095	acp7_c1_rnaAligned	0.458225	0.877614	1	FALSE	FALSE	FALSE	FALSE	FALSE
chr3	194402676	194494334	ATP13A3	0	-	23	19	42	0.047619	acp7_c2_rnaAligned	0.458225	0.643969	0.949705	FALSE	FALSE	FALSE	FALSE	FALSE
chr3	194402676	194494334	ATP13A3	0	-	15	19	34	-0.0588235	acp7_c4_rnaAligned	0.370944	0.607591	0.935092	FALSE	FALSE	FALSE	FALSE	FALSE
chr17	3923872	3964437	ATP2A3	0	-	17	6	23	0.23913	acp6_c1_rnaAligned	0.566991	0.0346897	0.201501	FALSE	TRUE	FALSE	FALSE	FALSE
chr17	3923872	3964437	ATP2A3	0	-	14	31	45	-0.188889	acp6_c2_rnaAligned	1.10933	0.0160944	0.117105	FALSE	FALSE	FALSE	FALSE	FALSE
chr17	3923872	3964437	ATP2A3	0	-	7	36	43	-0.337209	acp6_c5_rnaAligned	1.06003	8.96304e-06	0.00029338	TRUE	TRUE	TRUE	FALSE	FALSE
chr17	3923872	3964437	ATP2A3	0	-	4	18	22	-0.318182	acp6_c6_rnaAligned	0.542339	0.00434351	0.0485603	TRUE	TRUE	TRUE	FALSE	FALSE
chr17	3923872	3964437	ATP2A3	0	-	20	10	30	0.166667	acp7_c1_rnaAligned	0.739554	0.0987371	0.425236	FALSE	FALSE	FALSE	FALSE	FALSE
chr17	3923872	3964437	ATP2A3	0	-	10	1	11	0.409091	acp7_c2_rnaAligned	0.27117	0.0117188	0.102666	FALSE	TRUE	TRUE	TRUE	FALSE
chr17	3923872	3964437	ATP2A3	0	-	32	23	55	0.0818182	acp7_c4_rnaAligned	1.35585	0.28061	0.694632	FALSE	FALSE	FALSE	FALSE	FALSE
chr18	46080247	46104227	ATP5F1A	0	-	24	3	27	0.388889	acp6_c1_rnaAligned	1.12594	4.92334e-05	0.000982836	TRUE	TRUE	TRUE	FALSE	FALSE
chr18	46080247	46104227	ATP5F1A	0	-	16	2	18	0.388889	acp6_c2_rnaAligned	0.750626	0.00131226	0.0177002	TRUE	TRUE	TRUE	FALSE	FALSE
chr18	46080247	46104227	ATP5F1A	0	-	13	2	15	0.366667	acp6_c5_rnaAligned	0.625521	0.00738525	0.0789274	FALSE	TRUE	TRUE	FALSE	FALSE
chr18	46080247	46104227	ATP5F1A	0	-	12	3	15	0.3	acp6_c6_rnaAligned	0.625521	0.0351562	0.213731	FALSE	TRUE	TRUE	FALSE	FALSE
chr18	46080247	46104227	ATP5F1A	0	-	639	681	1320	-0.0159091	acp7_c1_rnaAligned	55.0459	0.259106	0.691825	FALSE	FALSE	FALSE	FALSE	FALSE
chr18	46080247	46104227	ATP5F1A	0	-	439	537	976	-0.0502049	acp7_c2_rnaAligned	40.7006	0.00188873	0.0263608	TRUE	FALSE	FALSE	FALSE	FALSE
chr18	46080247	46104227	ATP5F1A	0	-	546	617	1163	-0.0305245	acp7_c4_rnaAligned	48.4987	0.0400637	0.244734	FALSE	FALSE	FALSE	FALSE	FALSE
chr9	114587768	114598879	ATP6V1G1	0	+	43	46	89	-0.0168539	acp6_c1_rnaAligned	8.01008	0.832258	1	FALSE	FALSE	FALSE	FALSE	FALSE
chr9	114587768	114598879	ATP6V1G1	0	+	48	47	95	0.00526316	acp6_c2_rnaAligned	8.55009	1	1	FALSE	FALSE	FALSE	FALSE	FALSE
chr9	114587768	114598879	ATP6V1G1	0	+	32	38	70	-0.0428571	acp6_c5_rnaAligned	6.30006	0.550413	0.917928	FALSE	FALSE	FALSE	FALSE	FALSE
chr9	114587768	114598879	ATP6V1G1	0	+	56	55	111	0.0045045	acp6_c6_rnaAligned	9.9901	1	1	FALSE	FALSE	FALSE	FALSE	FALSE
chr9	114587768	114598879	ATP6V1G1	0	+	95	14	109	0.37156	acp7_c1_rnaAligned	9.8101	5.77092e-16	5.43952e-14	TRUE	TRUE	TRUE	FALSE	FALSE
chr9	114587768	114598879	ATP6V1G1	0	+	71	6	77	0.422078	acp7_c2_rnaAligned	6.93007	3.41832e-15	2.76713e-13	TRUE	TRUE	TRUE	TRUE	FALSE
chr9	114587768	114598879	ATP6V1G1	0	+	81	4	85	0.452941	acp7_c4_rnaAligned	7.65008	1.09974e-19	1.32119e-17	TRUE	TRUE	TRUE	TRUE	TRUE
chr7	98291649	98401090	BAIAP2L1	0	-	299	56	355	0.342254	acp6_c1_rnaAligned	3.24376	3.12548e-41	5.34988e-39	TRUE	TRUE	TRUE	FALSE	FALSE
chr7	98291649	98401090	BAIAP2L1	0	-	275	48	323	0.351393	acp6_c2_rnaAligned	2.95136	7.97349e-40	1.27373e-37	TRUE	TRUE	TRUE	FALSE	FALSE
chr7	98291649	98401090	BAIAP2L1	0	-	240	36	276	0.369565	acp6_c5_rnaAligned	2.52191	3.56448e-38	6.06194e-36	TRUE	TRUE	TRUE	FALSE	FALSE
chr7	98291649	98401090	BAIAP2L1	0	-	290	80	370	0.283784	acp6_c6_rnaAligned	3.38082	4.49135e-29	6.62635e-27	TRUE	TRUE	FALSE	FALSE	FALSE
chr7	98291649	98401090	BAIAP2L1	0	-	204	162	366	0.057377	acp7_c1_rnaAligned	3.34427	0.0319637	0.216972	FALSE	FALSE	FALSE	FALSE	FALSE
chr7	98291649	98401090	BAIAP2L1	0	-	173	146	319	0.0423197	acp7_c2_rnaAligned	2.91481	0.145352	0.497101	FALSE	FALSE	FALSE	FALSE	FALSE
chr7	98291649	98401090	BAIAP2L1	0	-	110	121	231	-0.0238095	acp7_c4_rnaAligned	2.11073	0.510657	0.882452	FALSE	FALSE	FALSE	FALSE	FALSE
chr14	74019348	74066092	BBOF1	0	+	17	13	30	0.0666667	acp6_c1_rnaAligned	0.641794	0.584665	0.906461	FALSE	FALSE	FALSE	FALSE	FALSE
chr14	74019348	74066092	BBOF1	0	+	14	10	24	0.0833333	acp6_c2_rnaAligned	0.513435	0.541256	0.89301	FALSE	FALSE	FALSE	FALSE	FALSE
chr14	74019348	74066092	BBOF1	0	+	8	6	14	0.0714286	acp6_c5_rnaAligned	0.299504	0.790527	1	FALSE	FALSE	FALSE	FALSE	FALSE
chr14	74019348	74066092	BBOF1	0	+	4	14	18	-0.277778	acp6_c6_rnaAligned	0.385076	0.0308838	0.195132	FALSE	TRUE	FALSE	FALSE	FALSE
chr14	74019348	74066092	BBOF1	0	+	19	18	37	0.0135135	acp7_c1_rnaAligned	0.791545	1	1	FALSE	FALSE	FALSE	FALSE	FALSE
chr14	74019348	74066092	BBOF1	0	+	10	27	37	-0.22973	acp7_c2_rnaAligned	0.791545	0.00763208	0.076368	FALSE	TRUE	FALSE	FALSE	FALSE
chr14	74019348	74066092	BBOF1	0	+	23	5	28	0.321429	acp7_c4_rnaAligned	0.599007	0.000912234	0.0147344	TRUE	TRUE	TRUE	FALSE	FALSE
chr14	23306832	23326163	BCL2L2-PABPN1	0	+	55	41	96	0.0729167	acp6_c1_rnaAligned	4.96612	0.184286	0.542855	FALSE	FALSE	FALSE	FALSE	FALSE
chr14	23306832	23326163	BCL2L2-PABPN1	0	+	45	50	95	-0.0263158	acp6_c2_rnaAligned	4.91439	0.681743	0.965437	FALSE	FALSE	FALSE	FALSE	FALSE
chr14	23306832	23326163	BCL2L2-PABPN1	0	+	38	37	75	0.00666667	acp6_c5_rnaAligned	3.87978	1	1	FALSE	FALSE	FALSE	FALSE	FALSE
chr14	23306832	23326163	BCL2L2-PABPN1	0	+	57	46	103	0.0533981	acp6_c6_rnaAligned	5.32823	0.324479	0.732982	FALSE	FALSE	FALSE	FALSE	FALSE
chr14	23306832	23326163	BCL2L2-PABPN1	0	+	29	0	29	0.5	acp7_c1_rnaAligned	1.50018	3.72529e-09	2.01166e-07	TRUE	TRUE	TRUE	TRUE	TRUE
chr14	23306832	23326163	BCL2L2-PABPN1	0	+	18	0	18	0.5	acp7_c2_rnaAligned	0.931147	7.62939e-06	0.000220571	TRUE	TRUE	TRUE	TRUE	TRUE
chr14	23306832	23326163	BCL2L2-PABPN1	0	+	15	0	15	0.5	acp7_c4_rnaAligned	0.775956	6.10352e-05	0.00139869	TRUE	TRUE	TRUE	TRUE	TRUE
chr14	100537146	100587417	BEGAIN	0	-	15	1	16	0.4375	acp6_c1_rnaAligned	0.318275	0.000518799	0.00743982	TRUE	TRUE	TRUE	TRUE	FALSE
chr14	100537146	100587417	BEGAIN	0	-	52	6	58	0.396552	acp6_c2_rnaAligned	1.15375	3.15819e-10	1.47872e-08	TRUE	TRUE	TRUE	FALSE	FALSE
chr14	100537146	100587417	BEGAIN	0	-	15	2	17	0.382353	acp6_c5_rnaAligned	0.338167	0.00234985	0.0325938	TRUE	TRUE	TRUE	FALSE	FALSE
chr14	100537146	100587417	BEGAIN	0	-	13	0	13	0.5	acp6_c6_rnaAligned	0.258598	0.000244141	0.00467485	TRUE	TRUE	TRUE	TRUE	TRUE
chr14	100537146	100587417	BEGAIN	0	-	13	3	16	0.3125	acp7_c2_rnaAligned	0.318275	0.0212708	0.158249	FALSE	TRUE	TRUE	FALSE	FALSE
chr14	100537146	100587417	BEGAIN	0	-	33	9	42	0.285714	acp7_c4_rnaAligned	0.835472	0.000271539	0.00527705	TRUE	TRUE	FALSE	FALSE	FALSE
chr17	43044294	43170327	BRCA1	0	-	10	2	12	0.333333	acp6_c1_rnaAligned	0.0952132	0.0385742	0.2127	FALSE	TRUE	TRUE	FALSE	FALSE
chr17	43044294	43170327	BRCA1	0	-	8	2	10	0.3	acp6_c2_rnaAligned	0.0793443	0.109375	0.405104	FALSE	TRUE	TRUE	FALSE	FALSE
chr17	43044294	43170327	BRCA1	0	-	10	0	10	0.5	acp6_c5_rnaAligned	0.0793443	0.00195312	0.0280441	TRUE	TRUE	TRUE	TRUE	TRUE
chr17	43044294	43170327	BRCA1	0	-	97	123	220	-0.0590909	acp7_c1_rnaAligned	1.74557	0.0916654	0.415807	FALSE	FALSE	FALSE	FALSE	FALSE
chr17	43044294	43170327	BRCA1	0	-	118	128	246	-0.0203252	acp7_c2_rnaAligned	1.95187	0.566179	0.907969	FALSE	FALSE	FALSE	FALSE	FALSE
chr17	43044294	43170327	BRCA1	0	-	81	91	172	-0.0290698	acp7_c4_rnaAligned	1.36472	0.492672	0.879225	FALSE	FALSE	FALSE	FALSE	FALSE
chr5	863740	892801	BRD9	0	-	98	11	109	0.399083	acp6_c1_rnaAligned	3.75073	1.32817e-18	1.03739e-16	TRUE	TRUE	TRUE	FALSE	FALSE
chr5	863740	892801	BRD9	0	-	86	6	92	0.434783	acp6_c2_rnaAligned	3.16575	3.09049e-19	2.56921e-17	TRUE	TRUE	TRUE	TRUE	FALSE
chr5	863740	892801	BRD9	0	-	90	20	110	0.318182	acp6_c5_rnaAligned	3.78514	8.63755e-12	6.03318e-10	TRUE	TRUE	TRUE	FALSE	FALSE
chr5	863740	892801	BRD9	0	-	89	9	98	0.408163	acp6_c6_rnaAligned	3.37222	1.10187e-17	9.89531e-16	TRUE	TRUE	TRUE	TRUE	FALSE
chr5	863740	892801	BRD9	0	-	22	35	57	-0.114035	acp7_c1_rnaAligned	1.96139	0.111161	0.455852	FALSE	FALSE	FALSE	FALSE	FALSE
chr5	863740	892801	BRD9	0	-	19	26	45	-0.0777778	acp7_c2_rnaAligned	1.54847	0.371298	0.764021	FALSE	FALSE	FALSE	FALSE	FALSE
chr5	863740	892801	BRD9	0	-	17	27	44	-0.113636	acp7_c4_rnaAligned	1.51406	0.174171	0.555239	FALSE	FALSE	FALSE	FALSE	FALSE
chr10	91923769	92031437	BTAF1	0	+	21	3	24	0.375	acp6_c1_rnaAligned	0.222907	0.000277162	0.00440665	TRUE	TRUE	TRUE	FALSE	FALSE
chr10	91923769	92031437	BTAF1	0	+	13	19	32	-0.09375	acp6_c2_rnaAligned	0.29721	0.377086	0.767645	FALSE	FALSE	FALSE	FALSE	FALSE
chr10	91923769	92031437	BTAF1	0	+	10	10	20	0	acp6_c5_rnaAligned	0.185756	1	1	FALSE	FALSE	FALSE	FALSE	FALSE
chr10	91923769	92031437	BTAF1	0	+	17	22	39	-0.0641026	acp6_c6_rnaAligned	0.362225	0.522397	0.882411	FALSE	FALSE	FALSE	FALSE	FALSE
chr10	91923769	92031437	BTAF1	0	+	183	175	358	0.0111732	acp7_c1_rnaAligned	3.32504	0.711467	1	FALSE	FALSE	FALSE	FALSE	FALSE
chr10	91923769	92031437	BTAF1	0	+	160	147	307	0.0211726	acp7_c2_rnaAligned	2.85136	0.493485	0.872028	FALSE	FALSE	FALSE	FALSE	FALSE
chr10	91923769	92031437	BTAF1	0	+	103	103	206	0	acp7_c4_rnaAligned	1.91329	1	1	FALSE	FALSE	FALSE	FALSE	FALSE
chr16	87302813	87317392	C16orf95	0	-	1	16	17	-0.441176	acp6_c1_rnaAligned	1.16606	0.000274658	0.0043755	TRUE	TRUE	TRUE	TRUE	FALSE
chr16	87302813	87317392	C16orf95	0	-	9	10	19	-0.0263158	acp6_c5_rnaAligned	1.30324	1	1	FALSE	FALSE	FALSE	FALSE	FALSE
chr16	87302813	87317392	C16orf95	0	-	5	11	16	-0.1875	acp6_c6_rnaAligned	1.09747	0.210114	0.603031	FALSE	FALSE	FALSE	FALSE	FALSE
chr16	87302813	87317392	C16orf95	0	-	3	6	9	-0.166667	acp7_c1_rnaAligned	0.617326	0.507812	0.891397	FALSE	FALSE	FALSE	FALSE	FALSE
chr2	189879561	190203484	C2orf88	0	+	30	1	31	0.467742	acp6_c1_rnaAligned	0.0957018	2.98023e-08	1.04699e-06	TRUE	TRUE	TRUE	TRUE	TRUE
chr2	189879561	190203484	C2orf88	0	+	28	0	28	0.5	acp6_c2_rnaAligned	0.0864403	7.45058e-09	3.11281e-07	TRUE	TRUE	TRUE	TRUE	TRUE
chr2	189879561	190203484	C2orf88	0	+	24	2	26	0.423077	acp6_c5_rnaAligned	0.080266	1.04904e-05	0.000336338	TRUE	TRUE	TRUE	TRUE	FALSE
chr2	189879561	190203484	C2orf88	0	+	20	0	20	0.5	acp6_c6_rnaAligned	0.0617431	1.90735e-06	5.70961e-05	TRUE	TRUE	TRUE	TRUE	TRUE
chr2	189879561	190203484	C2orf88	0	+	9	43	52	-0.326923	acp7_c1_rnaAligned	0.160532	2.03777e-06	7.39921e-05	TRUE	TRUE	TRUE	FALSE	FALSE
chr2	189879561	190203484	C2orf88	0	+	4	37	41	-0.402439	acp7_c2_rnaAligned	0.126573	1.02584e-07	4.13142e-06	TRUE	TRUE	TRUE	TRUE	FALSE
chr2	189879561	190203484	C2orf88	0	+	8	42	50	-0.34	acp7_c4_rnaAligned	0.154358	1.16356e-06	3.95959e-05	TRUE	TRUE	TRUE	FALSE	FALSE
chr8	68330372	68819023	C8orf34	0	+	12	40	52	-0.269231	acp7_c1_rnaAligned	0.106415	0.000127539	0.00301794	TRUE	TRUE	FALSE	FALSE	FALSE
chr8	68330372	68819023	C8orf34	0	+	7	50	57	-0.377193	acp7_c2_rnaAligned	0.116648	4.23671e-09	1.98244e-07	TRUE	TRUE	TRUE	FALSE	FALSE
chr8	68330372	68819023	C8orf34	0	+	3	15	18	-0.333333	acp7_c4_rnaAligned	0.0368361	0.00753784	0.0764291	FALSE	TRUE	TRUE	FALSE	FALSE
chr9	71911638	71986058	C9orf85	0	+	3	48	51	-0.441176	acp6_c1_rnaAligned	0.6853	1.96749e-11	9.65151e-10	TRUE	TRUE	TRUE	TRUE	FALSE
chr9	71911638	71986058	C9orf85	0	+	5	63	68	-0.426471	acp6_c2_rnaAligned	0.913733	7.65106e-14	4.83203e-12	TRUE	TRUE	TRUE	TRUE	FALSE
chr9	71911638	71986058	C9orf85	0	+	2	55	57	-0.464912	acp6_c5_rnaAligned	0.765923	2.29539e-14	1.83233e-12	TRUE	TRUE	TRUE	TRUE	TRUE
chr9	71911638	71986058	C9orf85	0	+	6	89	95	-0.436842	acp6_c6_rnaAligned	1.27654	4.69719e-20	5.04003e-18	TRUE	TRUE	TRUE	TRUE	FALSE
chr9	71911638	71986058	C9orf85	0	+	23	5	28	0.321429	acp7_c1_rnaAligned	0.376243	0.000912234	0.0156542	TRUE	TRUE	TRUE	FALSE	FALSE
chr9	71911638	71986058	C9orf85	0	+	12	11	23	0.0217391	acp7_c2_rnaAligned	0.309057	1	1	FALSE	FALSE	FALSE	FALSE	FALSE
chr9	71911638	71986058	C9orf85	0	+	9	14	23	-0.108696	acp7_c4_rnaAligned	0.309057	0.404873	0.807518	FALSE	FALSE	FALSE	FALSE	FALSE
chr3	54122551	55074557	CACNA2D3	0	+	15	65	80	-0.3125	acp6_c1_rnaAligned	0.0840331	1.41147e-08	5.29126e-07	TRUE	TRUE	TRUE	FALSE	FALSE
chr3	54122551	55074557	CACNA2D3	0	+	13	17	30	-0.0666667	acp6_c2_rnaAligned	0.0315124	0.584665	0.911242	FALSE	FALSE	FALSE	FALSE	FALSE
chr3	54122551	55074557	CACNA2D3	0	+	47	63	110	-0.0727273	acp6_c5_rnaAligned	0.115545	0.152338	0.526163	FALSE	FALSE	FALSE	FALSE	FALSE
chr3	54122551	55074557	CACNA2D3	0	+	82	115	197	-0.0837563	acp6_c6_rnaAligned	0.206931	0.0223722	0.158203	FALSE	FALSE	FALSE	FALSE	FALSE
chr3	54122551	55074557	CACNA2D3	0	+	39	41	80	-0.0125	acp7_c1_rnaAligned	0.0840331	0.911072	1	FALSE	FALSE	FALSE	FALSE	FALSE
chr3	54122551	55074557	CACNA2D3	0	+	38	76	114	-0.166667	acp7_c2_rnaAligned	0.119747	0.000475185	0.00845412	TRUE	FALSE	FALSE	FALSE	FALSE
chr3	54122551	55074557	CACNA2D3	0	+	26	16	42	0.119048	acp7_c4_rnaAligned	0.0441174	0.164149	0.543895	FALSE	FALSE	FALSE	FALSE	FALSE
chr3	84958988	86074429	CADM2	0	+	4	22	26	-0.346154	acp6_c6_rnaAligned	0.0233092	0.000533521	0.00915894	TRUE	TRUE	TRUE	FALSE	FALSE
chr3	84958988	86074429	CADM2	0	+	9	12	21	-0.0714286	acp7_c1_rnaAligned	0.0188266	0.663624	0.979392	FALSE	FALSE	FALSE	FALSE	FALSE
chr3	84958988	86074429	CADM2	0	+	8	12	20	-0.1	acp7_c4_rnaAligned	0.0179301	0.503445	0.880867	FALSE	FALSE	FALSE	FALSE	FALSE
chr3	62398347	62875416	CADPS	0	-	229	39	268	0.354478	acp6_c1_rnaAligned	0.561764	6.76099e-34	9.71288e-32	TRUE	TRUE	TRUE	FALSE	FALSE
chr3	62398347	62875416	CADPS	0	-	28	6	34	0.323529	acp6_c2_rnaAligned	0.0712685	0.000195126	0.00350925	TRUE	TRUE	TRUE	FALSE	FALSE
chr3	62398347	62875416	CADPS	0	-	51	19	70	0.228571	acp6_c5_rnaAligned	0.146729	0.000166042	0.00384303	TRUE	TRUE	FALSE	FALSE	FALSE
chr3	62398347	62875416	CADPS	0	-	118	45	163	0.223926	acp6_c6_rnaAligned	0.34167	9.73664e-09	3.98238e-07	TRUE	TRUE	FALSE	FALSE	FALSE
chr3	62398347	62875416	CADPS	0	-	6	34	40	-0.35	acp7_c1_rnaAligned	0.0838453	8.36458e-06	0.000268944	TRUE	TRUE	TRUE	FALSE	FALSE
chr3	62398347	62875416	CADPS	0	-	12	4	16	0.25	acp7_c2_rnaAligned	0.0335381	0.0768127	0.349809	FALSE	TRUE	FALSE	FALSE	FALSE
chr19	12938608	12944489	CALR	0	+	885	3	888	0.496622	acp6_c1_rnaAligned	150.995	1.13106e-259	8.27214e-257	TRUE	TRUE	TRUE	TRUE	TRUE
chr19	12938608	12944489	CALR	0	+	681	12	693	0.482684	acp6_c2_rnaAligned	117.837	1.15295e-183	1.34187e-180	TRUE	TRUE	TRUE	TRUE	TRUE
chr19	12938608	12944489	CALR	0	+	663	9	672	0.486607	acp6_c5_rnaAligned	114.266	7.55069e-183	6.56322e-180	TRUE	TRUE	TRUE	TRUE	TRUE
chr19	12938608	12944489	CALR	0	+	687	3	690	0.495652	acp6_c6_rnaAligned	117.327	2.13174e-200	2.20155e-197	TRUE	TRUE	TRUE	TRUE	TRUE
chr14	24426544	24429668	CBLN3	0	-	7	43	50	-0.36	acp7_c1_rnaAligned	16.0051	2.09868e-07	9.06629e-06	TRUE	TRUE	TRUE	FALSE	FALSE
chr14	24426544	24429668	CBLN3	0	-	1	25	26	-0.461538	acp7_c2_rnaAligned	8.32266	8.04663e-07	2.84443e-05	TRUE	TRUE	TRUE	TRUE	TRUE
chr14	24426544	24429668	CBLN3	0	-	2	22	24	-0.416667	acp7_c4_rnaAligned	7.68246	3.5882e-05	0.000878112	TRUE	TRUE	TRUE	TRUE	FALSE
chr7	26201442	26213607	CBX3	0	+	744	72	816	0.411765	acp6_c1_rnaAligned	67.0777	1.43675e-141	7.70576e-139	TRUE	TRUE	TRUE	TRUE	FALSE
chr7	26201442	26213607	CBX3	0	+	0	65	65	-0.5	acp6_c2_rnaAligned	5.3432	5.42101e-20	4.6984e-18	TRUE	TRUE	TRUE	TRUE	TRUE
chr7	26201442	26213607	CBX3	0	+	636	53	689	0.423077	acp6_c5_rnaAligned	56.6379	6.79485e-128	4.42968e-125	TRUE	TRUE	TRUE	TRUE	FALSE
chr7	26201442	26213607	CBX3	0	+	658	74	732	0.398907	acp6_c6_rnaAligned	60.1726	6.22253e-118	3.42737e-115	TRUE	TRUE	TRUE	FALSE	FALSE
chr7	26201442	26213607	CBX3	0	+	508	140	648	0.283951	acp7_c1_rnaAligned	53.2676	6.56241e-50	2.12622e-47	TRUE	TRUE	FALSE	FALSE	FALSE
chr7	26201442	26213607	CBX3	0	+	415	133	548	0.257299	acp7_c2_rnaAligned	45.0473	9.80709e-35	1.9363e-32	TRUE	TRUE	FALSE	FALSE	FALSE
chr7	26201442	26213607	CBX3	0	+	424	127	551	0.26951	acp7_c4_rnaAligned	45.2939	2.40333e-38	5.95501e-36	TRUE	TRUE	FALSE	FALSE	FALSE
chr22	38861421	38872216	CBX6	0	-	17	0	17	0.5	acp6_c1_rnaAligned	1.5748	1.52588e-05	0.000340047	TRUE	TRUE	TRUE	TRUE	TRUE
chr22	38861421	38872216	CBX6	0	-	21	0	21	0.5	acp6_c2_rnaAligned	1.94535	9.53674e-07	2.74544e-05	TRUE	TRUE	TRUE	TRUE	TRUE
chr22	38861421	38872216	CBX6	0	-	14	0	14	0.5	acp6_c5_rnaAligned	1.2969	0.00012207	0.00295652	TRUE	TRUE	TRUE	TRUE	TRUE
chr22	38861421	38872216	CBX6	0	-	15	0	15	0.5	acp6_c6_rnaAligned	1.38953	6.10352e-05	0.00139688	TRUE	TRUE	TRUE	TRUE	TRUE
chr2	130337932	130342681	CCDC115	0	-	15	10	25	0.1	acp6_c1_rnaAligned	5.26427	0.424356	0.794126	FALSE	FALSE	FALSE	FALSE	FALSE
chr2	130337932	130342681	CCDC115	0	-	16	17	33	-0.0151515	acp6_c2_rnaAligned	6.94883	1	1	FALSE	FALSE	FALSE	FALSE	FALSE
chr2	130337932	130342681	CCDC115	0	-	18	1	19	0.447368	acp6_c5_rnaAligned	4.00084	7.62939e-05	0.00198288	TRUE	TRUE	TRUE	TRUE	FALSE
chr2	130337932	130342681	CCDC115	0	-	16	9	25	0.14	acp6_c6_rnaAligned	5.26427	0.229523	0.627297	FALSE	FALSE	FALSE	FALSE	FALSE
chr2	130337932	130342681	CCDC115	0	-	13	7	20	0.15	acp7_c1_rnaAligned	4.21141	0.263176	0.694547	FALSE	FALSE	FALSE	FALSE	FALSE
chr2	130337932	130342681	CCDC115	0	-	8	4	12	0.166667	acp7_c2_rnaAligned	2.52685	0.387695	0.774473	FALSE	FALSE	FALSE	FALSE	FALSE
chr2	130337932	130342681	CCDC115	0	-	7	4	11	0.136364	acp7_c4_rnaAligned	2.31628	0.548828	0.905841	FALSE	FALSE	FALSE	FALSE	FALSE
chr17	16666716	16777881	CCDC144A	0	+	0	19	19	-0.5	acp6_c6_rnaAligned	0.170917	3.8147e-06	0.000106837	TRUE	TRUE	TRUE	TRUE	TRUE
chr17	16666716	16777881	CCDC144A	0	+	3	5	8	-0.125	acp7_c1_rnaAligned	0.0719651	0.726562	1	FALSE	FALSE	FALSE	FALSE	FALSE
chr11	124954201	125041489	CCDC15	0	+	19	27	46	-0.0869565	acp6_c1_rnaAligned	0.526991	0.301996	0.690411	FALSE	FALSE	FALSE	FALSE	FALSE
chr11	124954201	125041489	CCDC15	0	+	19	30	49	-0.112245	acp6_c2_rnaAligned	0.56136	0.152408	0.48408	FALSE	FALSE	FALSE	FALSE	FALSE
chr11	124954201	125041489	CCDC15	0	+	5	37	42	-0.380952	acp6_c5_rnaAligned	0.481166	4.4337e-07	1.89535e-05	TRUE	TRUE	TRUE	FALSE	FALSE
chr11	124954201	125041489	CCDC15	0	+	11	30	41	-0.231707	acp6_c6_rnaAligned	0.469709	0.004324	0.0484734	TRUE	TRUE	FALSE	FALSE	FALSE
chr11	124954201	125041489	CCDC15	0	+	5	9	14	-0.142857	acp7_c1_rnaAligned	0.160389	0.42395	0.836713	FALSE	FALSE	FALSE	FALSE	FALSE
chr11	124954201	125041489	CCDC15	0	+	1	7	8	-0.375	acp7_c2_rnaAligned	0.0916506	0.0703125	0.334812	FALSE	TRUE	TRUE	FALSE	FALSE
chr11	124954201	125041489	CCDC15	0	+	7	8	15	-0.0333333	acp7_c4_rnaAligned	0.171845	1	1	FALSE	FALSE	FALSE	FALSE	FALSE
chr2	196639714	196732806	CCDC150	0	+	0	11	11	-0.5	acp7_c1_rnaAligned	0.118163	0.000976562	0.0164203	TRUE	TRUE	TRUE	TRUE	TRUE
chr2	196639714	196732806	CCDC150	0	+	8	2	10	0.3	acp7_c4_rnaAligned	0.107421	0.109375	0.439997	FALSE	TRUE	TRUE	FALSE	FALSE
chr9	97307336	97378751	CCDC180	0	+	25	29	54	-0.037037	acp6_c1_rnaAligned	0.756144	0.683489	0.962821	FALSE	FALSE	FALSE	FALSE	FALSE
chr9	97307336	97378751	CCDC180	0	+	15	11	26	0.0769231	acp6_c2_rnaAligned	0.364069	0.557197	0.899255	FALSE	FALSE	FALSE	FALSE	FALSE
chr9	97307336	97378751	CCDC180	0	+	15	24	39	-0.115385	acp6_c5_rnaAligned	0.546104	0.199591	0.608803	FALSE	FALSE	FALSE	FALSE	FALSE
chr9	97307336	97378751	CCDC180	0	+	17	31	48	-0.145833	acp6_c6_rnaAligned	0.672128	0.0594634	0.303027	FALSE	FALSE	FALSE	FALSE	FALSE
chr9	97307336	97378751	CCDC180	0	+	8	40	48	-0.333333	acp7_c1_rnaAligned	0.672128	3.30527e-06	0.000116015	TRUE	TRUE	TRUE	FALSE	FALSE
chr9	97307336	97378751	CCDC180	0	+	35	44	79	-0.056962	acp7_c2_rnaAligned	1.10621	0.368188	0.761715	FALSE	FALSE	FALSE	FALSE	FALSE
chr9	97307336	97378751	CCDC180	0	+	11	15	26	-0.0769231	acp7_c4_rnaAligned	0.364069	0.557197	0.909057	FALSE	FALSE	FALSE	FALSE	FALSE
chr22	20148415	20151055	CCDC188	0	-	0	8	8	-0.5	acp7_c1_rnaAligned	3.0303	0.0078125	0.0818563	FALSE	TRUE	TRUE	TRUE	TRUE
chr22	20148415	20151055	CCDC188	0	-	0	19	19	-0.5	acp7_c2_rnaAligned	7.19697	3.8147e-06	0.000120156	TRUE	TRUE	TRUE	TRUE	TRUE
chr1	43991598	43996528	CCDC24	0	+	16	3	19	0.342105	acp6_c2_rnaAligned	3.85396	0.00442505	0.046042	TRUE	TRUE	TRUE	FALSE	FALSE
chr1	43991598	43996528	CCDC24	0	+	7	5	12	0.0833333	acp6_c6_rnaAligned	2.43408	0.774414	0.999495	FALSE	FALSE	FALSE	FALSE	FALSE
chr1	43991598	43996528	CCDC24	0	+	5	3	8	0.125	acp7_c1_rnaAligned	1.62272	0.726562	1	FALSE	FALSE	FALSE	FALSE	FALSE
chr5	151181051	151224092	CCDC69	0	-	12	0	12	0.5	acp6_c2_rnaAligned	0.278804	0.000488281	0.00749113	TRUE	TRUE	TRUE	TRUE	TRUE
chr5	151181051	151224092	CCDC69	0	-	8	2	10	0.3	acp7_c1_rnaAligned	0.232337	0.109375	0.450847	FALSE	TRUE	TRUE	FALSE	FALSE
chr20	44714860	44727811	CCN5	0	+	77	16	93	0.327957	acp6_c1_rnaAligned	7.18091	9.62978e-11	4.61437e-09	TRUE	TRUE	TRUE	FALSE	FALSE
chr20	44714860	44727811	CCN5	0	+	257	68	325	0.290769	acp6_c2_rnaAligned	25.0946	5.39364e-27	6.86594e-25	TRUE	TRUE	FALSE	FALSE	FALSE
chr20	44714860	44727811	CCN5	0	+	90	38	128	0.203125	acp6_c5_rnaAligned	9.88341	4.92285e-06	0.00016891	TRUE	TRUE	FALSE	FALSE	FALSE
chr20	44714860	44727811	CCN5	0	+	267	84	351	0.260684	acp6_c6_rnaAligned	27.1022	2.42091e-23	2.85737e-21	TRUE	TRUE	FALSE	FALSE	FALSE
chr20	44714860	44727811	CCN5	0	+	27	18	45	0.1	acp7_c1_rnaAligned	3.47464	0.232693	0.648431	FALSE	FALSE	FALSE	FALSE	FALSE
chr20	44714860	44727811	CCN5	0	+	6	3	9	0.166667	acp7_c2_rnaAligned	0.694927	0.507812	0.872028	FALSE	FALSE	FALSE	FALSE	FALSE
chr20	44714860	44727811	CCN5	0	+	10	8	18	0.0555556	acp7_c4_rnaAligned	1.38985	0.814529	1	FALSE	FALSE	FALSE	FALSE	FALSE
chr15	43185402	43197177	CCNDBP1	0	+	6	9	15	-0.1	acp6_c1_rnaAligned	1.27389	0.607239	0.917901	FALSE	FALSE	FALSE	FALSE	FALSE
chr15	43185402	43197177	CCNDBP1	0	+	1	14	15	-0.433333	acp6_c6_rnaAligned	1.27389	0.000976562	0.0152233	TRUE	TRUE	TRUE	TRUE	FALSE
chr15	43185402	43197177	CCNDBP1	0	+	3	6	9	-0.166667	acp7_c1_rnaAligned	0.764331	0.507812	0.891397	FALSE	FALSE	FALSE	FALSE	FALSE
chr15	43185402	43197177	CCNDBP1	0	+	6	2	8	0.25	acp7_c2_rnaAligned	0.679406	0.289062	0.678282	FALSE	TRUE	FALSE	FALSE	FALSE
chr12	7354959	7444153	CD163L1	0	-	15	0	15	0.5	acp6_c1_rnaAligned	0.168173	6.10352e-05	0.0011832	TRUE	TRUE	TRUE	TRUE	TRUE
chr12	7354959	7444153	CD163L1	0	-	19	4	23	0.326087	acp6_c2_rnaAligned	0.257865	0.00259948	0.0305034	TRUE	TRUE	TRUE	FALSE	FALSE
chr12	7354959	7444153	CD163L1	0	-	18	3	21	0.357143	acp6_c5_rnaAligned	0.235442	0.00148964	0.0225842	TRUE	TRUE	TRUE	FALSE	FALSE
chr12	7354959	7444153	CD163L1	0	-	10	0	10	0.5	acp6_c6_rnaAligned	0.112115	0.00195312	0.0259784	TRUE	TRUE	TRUE	TRUE	TRUE
chr12	7354959	7444153	CD163L1	0	-	3	5	8	-0.125	acp7_c1_rnaAligned	0.0896921	0.726562	1	FALSE	FALSE	FALSE	FALSE	FALSE
chr9	5450541	5470554	CD274	0	+	35	28	63	0.0555556	acp6_c1_rnaAligned	3.14795	0.449963	0.818911	FALSE	FALSE	FALSE	FALSE	FALSE
chr9	5450541	5470554	CD274	0	+	24	33	57	-0.0789474	acp6_c2_rnaAligned	2.84815	0.289244	0.679293	FALSE	FALSE	FALSE	FALSE	FALSE
chr9	5450541	5470554	CD274	0	+	30	27	57	0.0263158	acp6_c5_rnaAligned	2.84815	0.791366	1	FALSE	FALSE	FALSE	FALSE	FALSE
chr9	5450541	5470554	CD274	0	+	19	29	48	-0.104167	acp6_c6_rnaAligned	2.39844	0.193413	0.579396	FALSE	FALSE	FALSE	FALSE	FALSE
chr9	5450541	5470554	CD274	0	+	12	32	44	-0.227273	acp7_c1_rnaAligned	2.19857	0.00365777	0.0474777	TRUE	TRUE	FALSE	FALSE	FALSE
chr9	5450541	5470554	CD274	0	+	6	27	33	-0.318182	acp7_c2_rnaAligned	1.64893	0.000324063	0.00616443	TRUE	TRUE	TRUE	FALSE	FALSE
chr9	5450541	5470554	CD274	0	+	5	14	19	-0.236842	acp7_c4_rnaAligned	0.949383	0.0635681	0.33023	FALSE	TRUE	FALSE	FALSE	FALSE
chr1	160678745	160711822	CD48	0	-	21	2	23	0.413043	acp7_c1_rnaAligned	0.695347	6.60419e-05	0.00176056	TRUE	TRUE	TRUE	TRUE	FALSE
chr1	160678745	160711822	CD48	0	-	15	5	20	0.25	acp7_c4_rnaAligned	0.60465	0.0413895	0.249235	FALSE	TRUE	FALSE	FALSE	FALSE
chr19	6581647	6591150	CD70	0	-	15	0	15	0.5	acp6_c2_rnaAligned	1.57845	6.10352e-05	0.00125569	TRUE	TRUE	TRUE	TRUE	TRUE
chr19	6581647	6591150	CD70	0	-	10	2	12	0.333333	acp6_c6_rnaAligned	1.26276	0.0385742	0.228459	FALSE	TRUE	TRUE	FALSE	FALSE
chr19	6581647	6591150	CD70	0	-	45	60	105	-0.0714286	acp7_c1_rnaAligned	11.0491	0.171565	0.570573	FALSE	FALSE	FALSE	FALSE	FALSE
chr19	6581647	6591150	CD70	0	-	66	42	108	0.111111	acp7_c2_rnaAligned	11.3648	0.0264235	0.182041	FALSE	FALSE	FALSE	FALSE	FALSE
chr19	6581647	6591150	CD70	0	-	140	24	164	0.353659	acp7_c4_rnaAligned	17.2577	4.04851e-21	5.35011e-19	TRUE	TRUE	TRUE	FALSE	FALSE
chr13	49247924	49293485	CDADC1	0	+	18	5	23	0.282609	acp6_c1_rnaAligned	0.504818	0.010622	0.086932	FALSE	TRUE	FALSE	FALSE	FALSE
chr13	49247924	49293485	CDADC1	0	+	6	7	13	-0.0384615	acp6_c2_rnaAligned	0.285332	1	1	FALSE	FALSE	FALSE	FALSE	FALSE
chr13	49247924	49293485	CDADC1	0	+	5	8	13	-0.115385	acp6_c5_rnaAligned	0.285332	0.581055	0.929735	FALSE	FALSE	FALSE	FALSE	FALSE
chr13	49247924	49293485	CDADC1	0	+	12	5	17	0.205882	acp6_c6_rnaAligned	0.373126	0.143463	0.492231	FALSE	TRUE	FALSE	FALSE	FALSE
chr13	49247924	49293485	CDADC1	0	+	9	11	20	-0.05	acp7_c1_rnaAligned	0.438972	0.823803	1	FALSE	FALSE	FALSE	FALSE	FALSE
chr13	49247924	49293485	CDADC1	0	+	0	11	11	-0.5	acp7_c2_rnaAligned	0.241435	0.000976562	0.0157162	TRUE	TRUE	TRUE	TRUE	TRUE
chr13	49247924	49293485	CDADC1	0	+	5	8	13	-0.115385	acp7_c4_rnaAligned	0.285332	0.581055	0.923748	FALSE	FALSE	FALSE	FALSE	FALSE
chr2	173354871	173368997	CDCA7	0	+	17	9	26	0.153846	acp6_c1_rnaAligned	1.84058	0.168638	0.515672	FALSE	FALSE	FALSE	FALSE	FALSE
chr2	173354871	173368997	CDCA7	0	+	0	10	10	-0.5	acp6_c2_rnaAligned	0.707914	0.00195312	0.0245557	TRUE	TRUE	TRUE	TRUE	TRUE
chr2	173354871	173368997	CDCA7	0	+	14	11	25	0.06	acp6_c5_rnaAligned	1.76979	0.690038	0.974047	FALSE	FALSE	FALSE	FALSE	FALSE
chr2	173354871	173368997	CDCA7	0	+	19	12	31	0.112903	acp6_c6_rnaAligned	2.19453	0.281042	0.686769	FALSE	FALSE	FALSE	FALSE	FALSE
chr2	173354871	173368997	CDCA7	0	+	15	19	34	-0.0588235	acp7_c1_rnaAligned	2.40691	0.607591	0.943649	FALSE	FALSE	FALSE	FALSE	FALSE
chr2	173354871	173368997	CDCA7	0	+	14	20	34	-0.0882353	acp7_c2_rnaAligned	2.40691	0.391528	0.777539	FALSE	FALSE	FALSE	FALSE	FALSE
chr2	173354871	173368997	CDCA7	0	+	22	13	35	0.128571	acp7_c4_rnaAligned	2.4777	0.175465	0.555239	FALSE	FALSE	FALSE	FALSE	FALSE
chr1	205504668	205532790	CDK18	0	+	7	6	13	0.0384615	acp7_c1_rnaAligned	0.462272	1	1	FALSE	FALSE	FALSE	FALSE	FALSE
chr1	205504668	205532790	CDK18	0	+	19	4	23	0.326087	acp7_c2_rnaAligned	0.817865	0.00259948	0.0326751	TRUE	TRUE	TRUE	FALSE	FALSE
chr20	33358838	33401569	CDK5RAP1	0	-	16	1	17	0.441176	acp7_c1_rnaAligned	0.397838	0.000274658	0.00574124	TRUE	TRUE	TRUE	TRUE	FALSE
chr20	33358838	33401569	CDK5RAP1	0	-	13	2	15	0.366667	acp7_c2_rnaAligned	0.351033	0.00738525	0.0746362	FALSE	TRUE	TRUE	FALSE	FALSE
chr20	33358838	33401569	CDK5RAP1	0	-	11	3	14	0.285714	acp7_c4_rnaAligned	0.327631	0.057373	0.309463	FALSE	TRUE	FALSE	FALSE	FALSE
chr2	37196495	37212679	CEBPZOS	0	+	3	19	22	-0.363636	acp6_c1_rnaAligned	1.35937	0.000855446	0.011586	TRUE	TRUE	TRUE	FALSE	FALSE
chr2	37196495	37212679	CEBPZOS	0	+	7	27	34	-0.294118	acp6_c2_rnaAligned	2.10084	0.000821395	0.0119498	TRUE	TRUE	FALSE	FALSE	FALSE
chr2	37196495	37212679	CEBPZOS	0	+	5	13	18	-0.222222	acp6_c5_rnaAligned	1.11221	0.0962524	0.411017	FALSE	TRUE	FALSE	FALSE	FALSE
chr2	37196495	37212679	CEBPZOS	0	+	3	30	33	-0.409091	acp6_c6_rnaAligned	2.03905	1.40117e-06	4.30353e-05	TRUE	TRUE	TRUE	TRUE	FALSE
chr2	37196495	37212679	CEBPZOS	0	+	30	32	62	-0.016129	acp7_c1_rnaAligned	3.83094	0.899076	1	FALSE	FALSE	FALSE	FALSE	FALSE
chr2	37196495	37212679	CEBPZOS	0	+	19	25	44	-0.0681818	acp7_c2_rnaAligned	2.71873	0.451381	0.837481	FALSE	FALSE	FALSE	FALSE	FALSE
chr2	37196495	37212679	CEBPZOS	0	+	15	20	35	-0.0714286	acp7_c4_rnaAligned	2.16263	0.49956	0.880867	FALSE	FALSE	FALSE	FALSE	FALSE
chr11	47465936	47565539	CELF1	0	-	57	60	117	-0.0128205	acp6_c1_rnaAligned	1.17466	0.853408	1	FALSE	FALSE	FALSE	FALSE	FALSE
chr11	47465936	47565539	CELF1	0	-	88	78	166	0.0301205	acp6_c2_rnaAligned	1.66662	0.484957	0.853596	FALSE	FALSE	FALSE	FALSE	FALSE
chr11	47465936	47565539	CELF1	0	-	49	57	106	-0.0377358	acp6_c5_rnaAligned	1.06422	0.496754	0.887037	FALSE	FALSE	FALSE	FALSE	FALSE
chr11	47465936	47565539	CELF1	0	-	72	76	148	-0.0135135	acp6_c6_rnaAligned	1.4859	0.805321	1	FALSE	FALSE	FALSE	FALSE	FALSE
chr11	47465936	47565539	CELF1	0	-	11	5	16	0.1875	acp7_c1_rnaAligned	0.160638	0.210114	0.623019	FALSE	FALSE	FALSE	FALSE	FALSE
chr11	47465936	47565539	CELF1	0	-	16	0	16	0.5	acp7_c2_rnaAligned	0.160638	3.05176e-05	0.000755473	TRUE	TRUE	TRUE	TRUE	TRUE
chr11	47465936	47565539	CELF1	0	-	11	1	12	0.416667	acp7_c4_rnaAligned	0.120478	0.00634766	0.0675578	FALSE	TRUE	TRUE	TRUE	FALSE
chr10	10462549	11336675	CELF2	0	+	9	19	28	-0.178571	acp6_c1_rnaAligned	0.032032	0.0871586	0.358665	FALSE	FALSE	FALSE	FALSE	FALSE
chr10	10462549	11336675	CELF2	0	+	115	99	214	0.0373832	acp6_c2_rnaAligned	0.244816	0.305176	0.698333	FALSE	FALSE	FALSE	FALSE	FALSE
chr10	10462549	11336675	CELF2	0	+	13	58	71	-0.316901	acp6_c5_rnaAligned	0.081224	6.26943e-08	2.97247e-06	TRUE	TRUE	TRUE	FALSE	FALSE
chr10	10462549	11336675	CELF2	0	+	183	275	458	-0.100437	acp6_c6_rnaAligned	0.523952	1.99403e-05	0.000502277	TRUE	FALSE	FALSE	FALSE	FALSE
chr10	10462549	11336675	CELF2	0	+	78	68	146	0.0342466	acp7_c1_rnaAligned	0.167024	0.456482	0.860921	FALSE	FALSE	FALSE	FALSE	FALSE
chr10	10462549	11336675	CELF2	0	+	24	37	61	-0.106557	acp7_c2_rnaAligned	0.069784	0.123731	0.458562	FALSE	FALSE	FALSE	FALSE	FALSE
chr10	10462549	11336675	CELF2	0	+	10	19	29	-0.155172	acp7_c4_rnaAligned	0.033176	0.136046	0.49573	FALSE	FALSE	FALSE	FALSE	FALSE
chr22	46361173	46537620	CELSR1	0	-	20	5	25	0.3	acp6_c1_rnaAligned	0.141686	0.00407732	0.0421504	TRUE	TRUE	TRUE	FALSE	FALSE
chr22	46361173	46537620	CELSR1	0	-	6	4	10	0.1	acp6_c5_rnaAligned	0.0566742	0.753906	0.997325	FALSE	FALSE	FALSE	FALSE	FALSE
chr22	46361173	46537620	CELSR1	0	-	10	5	15	0.166667	acp6_c6_rnaAligned	0.0850114	0.301758	0.708429	FALSE	FALSE	FALSE	FALSE	FALSE
chr22	46361173	46537620	CELSR1	0	-	7	1	8	0.375	acp7_c1_rnaAligned	0.0453394	0.0703125	0.353408	FALSE	TRUE	TRUE	FALSE	FALSE
chr22	46361173	46537620	CELSR1	0	-	11	11	22	0	acp7_c2_rnaAligned	0.124683	1	1	FALSE	FALSE	FALSE	FALSE	FALSE
chr17	82018702	82022878	CENPX	0	-	26	18	44	0.0909091	acp7_c1_rnaAligned	10.5364	0.291215	0.716071	FALSE	FALSE	FALSE	FALSE	FALSE
chr17	82018702	82022878	CENPX	0	-	20	5	25	0.3	acp7_c2_rnaAligned	5.98659	0.00407732	0.0474905	TRUE	TRUE	TRUE	FALSE	FALSE
chr17	82018702	82022878	CENPX	0	-	24	20	44	0.0454545	acp7_c4_rnaAligned	10.5364	0.651588	0.96281	FALSE	FALSE	FALSE	FALSE	FALSE
chr17	64506761	64537946	CEP95	0	+	11	18	29	-0.12069	acp6_c1_rnaAligned	0.929934	0.264931	0.64487	FALSE	FALSE	FALSE	FALSE	FALSE
chr17	64506761	64537946	CEP95	0	+	10	17	27	-0.12963	acp6_c2_rnaAligned	0.865801	0.247789	0.623851	FALSE	FALSE	FALSE	FALSE	FALSE
chr17	64506761	64537946	CEP95	0	+	1	16	17	-0.441176	acp6_c5_rnaAligned	0.545134	0.000274658	0.00583873	TRUE	TRUE	TRUE	TRUE	FALSE
chr17	64506761	64537946	CEP95	0	+	6	8	14	-0.0714286	acp6_c6_rnaAligned	0.448934	0.790527	1	FALSE	FALSE	FALSE	FALSE	FALSE
chr17	64506761	64537946	CEP95	0	+	11	12	23	-0.0217391	acp7_c1_rnaAligned	0.737534	1	1	FALSE	FALSE	FALSE	FALSE	FALSE
chr17	64506761	64537946	CEP95	0	+	12	13	25	-0.02	acp7_c2_rnaAligned	0.801667	1	1	FALSE	FALSE	FALSE	FALSE	FALSE
chr17	64506761	64537946	CEP95	0	+	11	9	20	0.05	acp7_c4_rnaAligned	0.641334	0.823803	1	FALSE	FALSE	FALSE	FALSE	FALSE
chr19	8209369	8262421	CERS4	0	+	38	28	66	0.0757576	acp6_c1_rnaAligned	1.24406	0.267812	0.645978	FALSE	FALSE	FALSE	FALSE	FALSE
chr19	8209369	8262421	CERS4	0	+	22	25	47	-0.0319149	acp6_c2_rnaAligned	0.885923	0.770867	1	FALSE	FALSE	FALSE	FALSE	FALSE
chr19	8209369	8262421	CERS4	0	+	18	8	26	0.192308	acp6_c5_rnaAligned	0.490085	0.0755187	0.36385	FALSE	FALSE	FALSE	FALSE	FALSE
chr19	8209369	8262421	CERS4	0	+	26	3	29	0.396552	acp6_c6_rnaAligned	0.546633	1.52364e-05	0.000387902	TRUE	TRUE	TRUE	FALSE	FALSE
chr19	8209369	8262421	CERS4	0	+	5	9	14	-0.142857	acp7_c1_rnaAligned	0.263892	0.42395	0.836713	FALSE	FALSE	FALSE	FALSE	FALSE
chr19	8209369	8262421	CERS4	0	+	2	11	13	-0.346154	acp7_c4_rnaAligned	0.245043	0.0224609	0.167223	FALSE	TRUE	TRUE	FALSE	FALSE
chr2	169645424	169694405	CFAP210	0	-	20	9	29	0.189655	acp7_c1_rnaAligned	0.592066	0.0614283	0.328972	FALSE	FALSE	FALSE	FALSE	FALSE
chr2	169645424	169694405	CFAP210	0	-	15	2	17	0.382353	acp7_c2_rnaAligned	0.347073	0.00234985	0.0306313	TRUE	TRUE	TRUE	FALSE	FALSE
chr2	169645424	169694405	CFAP210	0	-	6	9	15	-0.1	acp7_c4_rnaAligned	0.306241	0.607239	0.935092	FALSE	FALSE	FALSE	FALSE	FALSE
chr1	196774839	196795407	CFHR3	0	+	0	30	30	-0.5	acp6_c1_rnaAligned	1.45858	1.86265e-09	7.76424e-08	TRUE	TRUE	TRUE	TRUE	TRUE
chr1	196774839	196795407	CFHR3	0	+	0	54	54	-0.5	acp6_c2_rnaAligned	2.62544	1.11022e-16	8.37499e-15	TRUE	TRUE	TRUE	TRUE	TRUE
chr1	196774839	196795407	CFHR3	0	+	0	23	23	-0.5	acp6_c5_rnaAligned	1.11824	2.38419e-07	1.03047e-05	TRUE	TRUE	TRUE	TRUE	TRUE
chr1	196774839	196795407	CFHR3	0	+	1	14	15	-0.433333	acp6_c6_rnaAligned	0.729288	0.000976562	0.0152233	TRUE	TRUE	TRUE	TRUE	FALSE
chr6	73423710	73452297	CGAS	0	-	13	10	23	0.0652174	acp6_c1_rnaAligned	0.804562	0.677639	0.957838	FALSE	FALSE	FALSE	FALSE	FALSE
chr6	73423710	73452297	CGAS	0	-	30	15	45	0.166667	acp6_c2_rnaAligned	1.57414	0.0356978	0.203522	FALSE	FALSE	FALSE	FALSE	FALSE
chr6	73423710	73452297	CGAS	0	-	9	11	20	-0.05	acp6_c5_rnaAligned	0.699619	0.823803	1	FALSE	FALSE	FALSE	FALSE	FALSE
chr6	73423710	73452297	CGAS	0	-	24	14	38	0.131579	acp6_c6_rnaAligned	1.32928	0.143307	0.492231	FALSE	FALSE	FALSE	FALSE	FALSE
chr6	73423710	73452297	CGAS	0	-	27	27	54	0	acp7_c1_rnaAligned	1.88897	1	1	FALSE	FALSE	FALSE	FALSE	FALSE
chr6	73423710	73452297	CGAS	0	-	25	1	26	0.461538	acp7_c2_rnaAligned	0.909504	8.04663e-07	2.84443e-05	TRUE	TRUE	TRUE	TRUE	TRUE
chr6	73423710	73452297	CGAS	0	-	45	21	66	0.181818	acp7_c4_rnaAligned	2.30874	0.00427241	0.0493099	TRUE	FALSE	FALSE	FALSE	FALSE
chr2	27099352	27119128	CGREF1	0	-	18	2	20	0.4	acp6_c1_rnaAligned	1.01133	0.000402451	0.00601806	TRUE	TRUE	TRUE	TRUE	FALSE
chr2	27099352	27119128	CGREF1	0	-	20	3	23	0.369565	acp6_c6_rnaAligned	1.16303	0.000488281	0.00856514	TRUE	TRUE	TRUE	FALSE	FALSE
chr2	27099352	27119128	CGREF1	0	-	23	4	27	0.351852	acp7_c1_rnaAligned	1.36529	0.000310749	0.00626256	TRUE	TRUE	TRUE	FALSE	FALSE
chr2	27099352	27119128	CGREF1	0	-	8	5	13	0.115385	acp7_c4_rnaAligned	0.657362	0.581055	0.923748	FALSE	FALSE	FALSE	FALSE	FALSE
chr4	54009788	54091879	CHIC2	0	-	10	43	53	-0.311321	acp6_c1_rnaAligned	0.645625	5.55052e-06	0.000135726	TRUE	TRUE	TRUE	FALSE	FALSE
chr4	54009788	54091879	CHIC2	0	-	4	34	38	-0.394737	acp6_c2_rnaAligned	0.462901	6.03854e-07	1.82885e-05	TRUE	TRUE	TRUE	FALSE	FALSE
chr4	54009788	54091879	CHIC2	0	-	7	33	40	-0.325	acp6_c5_rnaAligned	0.487264	4.2277e-05	0.00118542	TRUE	TRUE	TRUE	FALSE	FALSE
chr4	54009788	54091879	CHIC2	0	-	5	37	42	-0.380952	acp6_c6_rnaAligned	0.511627	4.4337e-07	1.49515e-05	TRUE	TRUE	TRUE	FALSE	FALSE
chr4	54009788	54091879	CHIC2	0	-	9	7	16	0.0625	acp7_c1_rnaAligned	0.194906	0.803619	1	FALSE	FALSE	FALSE	FALSE	FALSE
chr4	54009788	54091879	CHIC2	0	-	4	5	9	-0.0555556	acp7_c2_rnaAligned	0.109634	1	1	FALSE	FALSE	FALSE	FALSE	FALSE
chr4	54009788	54091879	CHIC2	0	-	4	5	9	-0.0555556	acp7_c4_rnaAligned	0.109634	1	1	FALSE	FALSE	FALSE	FALSE	FALSE
chr11	867858	915214	CHID1	0	-	278	289	567	-0.00970018	acp6_c1_rnaAligned	11.9731	0.674552	0.957777	FALSE	FALSE	FALSE	FALSE	FALSE
chr11	867858	915214	CHID1	0	-	262	260	522	0.00191571	acp6_c2_rnaAligned	11.0229	0.965094	1	FALSE	FALSE	FALSE	FALSE	FALSE
chr11	867858	915214	CHID1	0	-	210	247	457	-0.0404814	acp6_c5_rnaAligned	9.65031	0.0920709	0.402114	FALSE	FALSE	FALSE	FALSE	FALSE
chr11	867858	915214	CHID1	0	-	286	328	614	-0.034202	acp6_c6_rnaAligned	12.9656	0.0979213	0.400643	FALSE	FALSE	FALSE	FALSE	FALSE
chr11	867858	915214	CHID1	0	-	18	17	35	0.0142857	acp7_c1_rnaAligned	0.739083	1	1	FALSE	FALSE	FALSE	FALSE	FALSE
chr11	867858	915214	CHID1	0	-	20	4	24	0.333333	acp7_c2_rnaAligned	0.5068	0.00154388	0.0223573	TRUE	TRUE	TRUE	FALSE	FALSE
chr11	867858	915214	CHID1	0	-	11	3	14	0.285714	acp7_c4_rnaAligned	0.295633	0.057373	0.309463	FALSE	TRUE	FALSE	FALSE	FALSE
chr1	239386567	239915450	CHRM3	0	+	36	14	50	0.22	acp6_c1_rnaAligned	0.0945389	0.00260217	0.0296489	TRUE	TRUE	FALSE	FALSE	FALSE
chr1	239386567	239915450	CHRM3	0	+	13	6	19	0.184211	acp6_c2_rnaAligned	0.0359248	0.167068	0.508065	FALSE	FALSE	FALSE	FALSE	FALSE
chr1	239386567	239915450	CHRM3	0	+	5	7	12	-0.0833333	acp6_c5_rnaAligned	0.0226893	0.774414	1	FALSE	FALSE	FALSE	FALSE	FALSE
chr1	239386567	239915450	CHRM3	0	+	23	16	39	0.0897436	acp6_c6_rnaAligned	0.0737403	0.336784	0.74323	FALSE	FALSE	FALSE	FALSE	FALSE
chr1	239386567	239915450	CHRM3	0	+	1	29	30	-0.466667	acp7_c2_rnaAligned	0.0567233	5.7742e-08	2.3848e-06	TRUE	TRUE	TRUE	TRUE	TRUE
chr15	78565519	78595269	CHRNA5	0	+	28	5	33	0.348485	acp6_c1_rnaAligned	1.10924	6.61877e-05	0.0012648	TRUE	TRUE	TRUE	FALSE	FALSE
chr15	78565519	78595269	CHRNA5	0	+	20	4	24	0.333333	acp6_c2_rnaAligned	0.806723	0.00154388	0.0202871	TRUE	TRUE	TRUE	FALSE	FALSE
chr15	78565519	78595269	CHRNA5	0	+	26	2	28	0.428571	acp6_c5_rnaAligned	0.941176	3.03239e-06	0.000108321	TRUE	TRUE	TRUE	TRUE	FALSE
chr15	78565519	78595269	CHRNA5	0	+	16	8	24	0.166667	acp6_c6_rnaAligned	0.806723	0.15159	0.505014	FALSE	FALSE	FALSE	FALSE	FALSE
chr10	124007667	124093598	CHST15	0	-	0	37	37	-0.5	acp7_c1_rnaAligned	0.430578	1.45519e-11	9.72899e-10	TRUE	TRUE	TRUE	TRUE	TRUE
chr10	124007667	124093598	CHST15	0	-	0	52	52	-0.5	acp7_c2_rnaAligned	0.605137	4.44089e-16	3.74469e-14	TRUE	TRUE	TRUE	TRUE	TRUE
chr10	124007667	124093598	CHST15	0	-	5	16	21	-0.261905	acp7_c4_rnaAligned	0.244382	0.0266037	0.18834	FALSE	TRUE	FALSE	FALSE	FALSE
chr4	102868991	102892807	CISD2	0	+	70	287	357	-0.303922	acp6_c1_rnaAligned	14.9899	2.58391e-32	3.52332e-30	TRUE	TRUE	TRUE	FALSE	FALSE
chr4	102868991	102892807	CISD2	0	+	63	234	297	-0.287879	acp6_c2_rnaAligned	12.4706	2.72661e-24	3.08524e-22	TRUE	TRUE	FALSE	FALSE	FALSE
chr4	102868991	102892807	CISD2	0	+	54	235	289	-0.313149	acp6_c5_rnaAligned	12.1347	4.40097e-28	6.49599e-26	TRUE	TRUE	TRUE	FALSE	FALSE
chr4	102868991	102892807	CISD2	0	+	69	262	331	-0.291541	acp6_c6_rnaAligned	13.8982	1.28977e-27	1.74689e-25	TRUE	TRUE	FALSE	FALSE	FALSE
chr4	102868991	102892807	CISD2	0	+	12	135	147	-0.418367	acp7_c1_rnaAligned	6.17232	1.64652e-27	3.01528e-25	TRUE	TRUE	TRUE	TRUE	FALSE
chr4	102868991	102892807	CISD2	0	+	10	104	114	-0.412281	acp7_c2_rnaAligned	4.7867	7.23521e-21	8.13459e-19	TRUE	TRUE	TRUE	TRUE	FALSE
chr4	102868991	102892807	CISD2	0	+	13	107	120	-0.391667	acp7_c4_rnaAligned	5.03863	1.49587e-19	1.74423e-17	TRUE	TRUE	TRUE	FALSE	FALSE
chr9	128166064	128204222	CIZ1	0	-	29	27	56	0.0178571	acp6_c1_rnaAligned	1.46758	0.893853	1	FALSE	FALSE	FALSE	FALSE	FALSE
chr9	128166064	128204222	CIZ1	0	-	15	19	34	-0.0588235	acp6_c2_rnaAligned	0.891032	0.607591	0.923172	FALSE	FALSE	FALSE	FALSE	FALSE
chr9	128166064	128204222	CIZ1	0	-	18	17	35	0.0142857	acp6_c5_rnaAligned	0.917239	1	1	FALSE	FALSE	FALSE	FALSE	FALSE
chr9	128166064	128204222	CIZ1	0	-	24	22	46	0.0217391	acp6_c6_rnaAligned	1.20551	0.882996	1	FALSE	FALSE	FALSE	FALSE	FALSE
chr9	128166064	128204222	CIZ1	0	-	4	20	24	-0.333333	acp7_c1_rnaAligned	0.628964	0.00154388	0.0240912	TRUE	TRUE	TRUE	FALSE	FALSE
chr9	128166064	128204222	CIZ1	0	-	3	17	20	-0.35	acp7_c2_rnaAligned	0.524136	0.00257683	0.0325928	TRUE	TRUE	TRUE	FALSE	FALSE
chr9	128166064	128204222	CIZ1	0	-	9	9	18	0	acp7_c4_rnaAligned	0.471723	1	1	FALSE	FALSE	FALSE	FALSE	FALSE
chr13	52455477	52476627	CKAP2	0	+	61	80	141	-0.0673759	acp6_c1_rnaAligned	6.66667	0.129258	0.446108	FALSE	FALSE	FALSE	FALSE	FALSE
chr13	52455477	52476627	CKAP2	0	+	64	54	118	0.0423729	acp6_c2_rnaAligned	5.5792	0.407486	0.790786	FALSE	FALSE	FALSE	FALSE	FALSE
chr13	52455477	52476627	CKAP2	0	+	38	44	82	-0.0365854	acp6_c5_rnaAligned	3.87707	0.581114	0.929735	FALSE	FALSE	FALSE	FALSE	FALSE
chr13	52455477	52476627	CKAP2	0	+	55	46	101	0.0445545	acp6_c6_rnaAligned	4.77541	0.42616	0.815031	FALSE	FALSE	FALSE	FALSE	FALSE
chr13	52455477	52476627	CKAP2	0	+	10	2	12	0.333333	acp7_c1_rnaAligned	0.567376	0.0385742	0.243389	FALSE	TRUE	TRUE	FALSE	FALSE
chr13	52455477	52476627	CKAP2	0	+	11	4	15	0.233333	acp7_c2_rnaAligned	0.70922	0.118469	0.448554	FALSE	TRUE	FALSE	FALSE	FALSE
chr13	52455477	52476627	CKAP2	0	+	20	3	23	0.369565	acp7_c4_rnaAligned	1.08747	0.000488281	0.00862268	TRUE	TRUE	TRUE	FALSE	FALSE
chr3	170418867	170434691	CLDN11	0	+	85	42	127	0.169291	acp6_c1_rnaAligned	8.02578	0.000170094	0.00288086	TRUE	FALSE	FALSE	FALSE	FALSE
chr3	170418867	170434691	CLDN11	0	+	66	6	72	0.416667	acp6_c2_rnaAligned	4.55005	7.25575e-14	4.61817e-12	TRUE	TRUE	TRUE	TRUE	FALSE
chr3	170418867	170434691	CLDN11	0	+	84	52	136	0.117647	acp6_c5_rnaAligned	8.59454	0.00762383	0.0804874	FALSE	FALSE	FALSE	FALSE	FALSE
chr3	170418867	170434691	CLDN11	0	+	89	28	117	0.260684	acp6_c6_rnaAligned	7.39383	1.36613e-08	5.45263e-07	TRUE	TRUE	FALSE	FALSE	FALSE
chr8	8701936	8704096	CLDN23	0	+	66	29	95	0.194737	acp6_c1_rnaAligned	43.9815	0.000186402	0.00313725	TRUE	FALSE	FALSE	FALSE	FALSE
chr8	8701936	8704096	CLDN23	0	+	47	17	64	0.234375	acp6_c2_rnaAligned	29.6296	0.000226882	0.0039496	TRUE	TRUE	FALSE	FALSE	FALSE
chr8	8701936	8704096	CLDN23	0	+	48	38	86	0.0581395	acp6_c5_rnaAligned	39.8148	0.331834	0.765723	FALSE	FALSE	FALSE	FALSE	FALSE
chr8	8701936	8704096	CLDN23	0	+	80	15	95	0.342105	acp6_c6_rnaAligned	43.9815	6.81278e-12	4.04944e-10	TRUE	TRUE	TRUE	FALSE	FALSE
chr8	8701936	8704096	CLDN23	0	+	4	8	12	-0.166667	acp7_c1_rnaAligned	5.55556	0.387695	0.803768	FALSE	FALSE	FALSE	FALSE	FALSE
chr12	10069553	10098985	CLEC1A	0	-	57	5	62	0.419355	acp6_c1_rnaAligned	2.10655	3.06553e-12	1.59111e-10	TRUE	TRUE	TRUE	TRUE	FALSE
chr12	10069553	10098985	CLEC1A	0	-	75	13	88	0.352273	acp6_c2_rnaAligned	2.98994	9.32627e-12	4.96608e-10	TRUE	TRUE	TRUE	FALSE	FALSE
chr12	10069553	10098985	CLEC1A	0	-	18	12	30	0.1	acp6_c5_rnaAligned	1.0193	0.361595	0.786278	FALSE	FALSE	FALSE	FALSE	FALSE
chr12	10069553	10098985	CLEC1A	0	-	16	5	21	0.261905	acp6_c6_rnaAligned	0.713509	0.0266037	0.176972	FALSE	TRUE	FALSE	FALSE	FALSE
chr4	140388452	140427648	CLGN	0	-	94	1	95	0.489474	acp6_c1_rnaAligned	2.42372	4.84676e-27	5.57031e-25	TRUE	TRUE	TRUE	TRUE	TRUE
chr4	140388452	140427648	CLGN	0	-	91	1	92	0.48913	acp6_c2_rnaAligned	2.34718	3.75624e-26	4.56748e-24	TRUE	TRUE	TRUE	TRUE	TRUE
chr4	140388452	140427648	CLGN	0	-	188	2	190	0.489474	acp6_c5_rnaAligned	4.84743	2.31266e-53	5.32116e-51	TRUE	TRUE	TRUE	TRUE	TRUE
chr4	140388452	140427648	CLGN	0	-	225	1	226	0.495575	acp6_c6_rnaAligned	5.76589	4.20995e-66	1.12202e-63	TRUE	TRUE	TRUE	TRUE	TRUE
chr4	140388452	140427648	CLGN	0	-	111	74	185	0.1	acp7_c1_rnaAligned	4.71987	0.00795373	0.0829235	FALSE	FALSE	FALSE	FALSE	FALSE
chr4	140388452	140427648	CLGN	0	-	33	47	80	-0.0875	acp7_c2_rnaAligned	2.04102	0.145635	0.497101	FALSE	FALSE	FALSE	FALSE	FALSE
chr4	140388452	140427648	CLGN	0	-	59	54	113	0.0221239	acp7_c4_rnaAligned	2.88295	0.706882	0.996181	FALSE	FALSE	FALSE	FALSE	FALSE
chr8	60964847	61501629	CLVS1	0	+	9	0	9	0.5	acp7_c2_rnaAligned	0.0167666	0.00390625	0.0457614	TRUE	TRUE	TRUE	TRUE	TRUE
chr8	60964847	61501629	CLVS1	0	+	9	2	11	0.318182	acp7_c4_rnaAligned	0.0204925	0.0654297	0.33023	FALSE	TRUE	TRUE	FALSE	FALSE
chr5	10277594	10307902	CMBL	0	-	37	9	46	0.304348	acp6_c1_rnaAligned	1.51775	4.05604e-05	0.000823546	TRUE	TRUE	TRUE	FALSE	FALSE
chr5	10277594	10307902	CMBL	0	-	23	4	27	0.351852	acp6_c2_rnaAligned	0.890854	0.000310749	0.00515615	TRUE	TRUE	TRUE	FALSE	FALSE
chr5	10277594	10307902	CMBL	0	-	24	1	25	0.46	acp6_c5_rnaAligned	0.824865	1.54972e-06	5.77308e-05	TRUE	TRUE	TRUE	TRUE	TRUE
chr5	10277594	10307902	CMBL	0	-	12	8	20	0.1	acp6_c6_rnaAligned	0.659892	0.503445	0.869276	FALSE	FALSE	FALSE	FALSE	FALSE
chr5	10277594	10307902	CMBL	0	-	39	27	66	0.0909091	acp7_c1_rnaAligned	2.17764	0.175286	0.572932	FALSE	FALSE	FALSE	FALSE	FALSE
chr5	10277594	10307902	CMBL	0	-	28	17	45	0.122222	acp7_c2_rnaAligned	1.48476	0.135156	0.480919	FALSE	FALSE	FALSE	FALSE	FALSE
chr5	10277594	10307902	CMBL	0	-	35	35	70	0	acp7_c4_rnaAligned	2.30962	1	1	FALSE	FALSE	FALSE	FALSE	FALSE
chr2	206175315	206217912	CMKLR2	0	-	63	12	75	0.34	acp6_c1_rnaAligned	1.76069	1.69384e-09	7.13452e-08	TRUE	TRUE	TRUE	FALSE	FALSE
chr2	206175315	206217912	CMKLR2	0	-	74	17	91	0.313187	acp6_c2_rnaAligned	2.1363	1.19341e-09	5.22726e-08	TRUE	TRUE	TRUE	FALSE	FALSE
chr2	206175315	206217912	CMKLR2	0	-	50	11	61	0.319672	acp6_c5_rnaAligned	1.43203	4.58883e-07	1.94046e-05	TRUE	TRUE	TRUE	FALSE	FALSE
chr2	206175315	206217912	CMKLR2	0	-	118	64	182	0.148352	acp6_c6_rnaAligned	4.2726	7.64017e-05	0.00168328	TRUE	FALSE	FALSE	FALSE	FALSE
chr2	206175315	206217912	CMKLR2	0	-	158	55	213	0.241784	acp7_c1_rnaAligned	5.00035	9.88884e-13	7.50483e-11	TRUE	TRUE	FALSE	FALSE	FALSE
chr2	206175315	206217912	CMKLR2	0	-	48	19	67	0.216418	acp7_c2_rnaAligned	1.57288	0.000521613	0.00902234	TRUE	TRUE	FALSE	FALSE	FALSE
chr2	206175315	206217912	CMKLR2	0	-	35	2	37	0.445946	acp7_c4_rnaAligned	0.868606	1.02445e-08	4.66833e-07	TRUE	TRUE	TRUE	TRUE	FALSE
chr19	1026607	1039065	CNN2	0	+	1826	109	1935	0.443669	acp6_c1_rnaAligned	155.322	0	0	TRUE	TRUE	TRUE	TRUE	FALSE
chr19	1026607	1039065	CNN2	0	+	1591	151	1742	0.413318	acp6_c2_rnaAligned	139.83	3.1915e-303	8.66705e-300	TRUE	TRUE	TRUE	TRUE	FALSE
chr19	1026607	1039065	CNN2	0	+	1330	87	1417	0.438603	acp6_c5_rnaAligned	113.742	2.78978e-286	4.36489e-283	TRUE	TRUE	TRUE	TRUE	FALSE
chr19	1026607	1039065	CNN2	0	+	1908	114	2022	0.44362	acp6_c6_rnaAligned	162.305	0	0	TRUE	TRUE	TRUE	TRUE	FALSE
chr19	1026607	1039065	CNN2	0	+	11154	2937	14091	0.291569	acp7_c1_rnaAligned	1131.08	0	0	TRUE	TRUE	FALSE	FALSE	FALSE
chr19	1026607	1039065	CNN2	0	+	8689	2218	10907	0.296644	acp7_c2_rnaAligned	875.502	0	0	TRUE	TRUE	FALSE	FALSE	FALSE
chr19	1026607	1039065	CNN2	0	+	9469	1671	11140	0.35	acp7_c4_rnaAligned	894.205	0	0	TRUE	TRUE	TRUE	FALSE	FALSE
chr7	146116800	148420998	CNTNAP2	0	+	6	9	15	-0.1	acp7_c1_rnaAligned	0.00650986	0.607239	0.943649	FALSE	FALSE	FALSE	FALSE	FALSE
chr7	146116800	148420998	CNTNAP2	0	+	0	8	8	-0.5	acp7_c2_rnaAligned	0.00347192	0.0078125	0.0764718	FALSE	TRUE	TRUE	TRUE	TRUE
chr9	98943906	99070787	COL15A1	0	+	21	10	31	0.177419	acp6_c2_rnaAligned	0.244323	0.0707555	0.31431	FALSE	FALSE	FALSE	FALSE	FALSE
chr9	98943906	99070787	COL15A1	0	+	6	4	10	0.1	acp6_c5_rnaAligned	0.078814	0.753906	0.997325	FALSE	FALSE	FALSE	FALSE	FALSE
chr9	98943906	99070787	COL15A1	0	+	17	11	28	0.107143	acp6_c6_rnaAligned	0.220679	0.344928	0.746216	FALSE	FALSE	FALSE	FALSE	FALSE
chr9	98943906	99070787	COL15A1	0	+	7	2	9	0.277778	acp7_c1_rnaAligned	0.0709326	0.179688	0.572932	FALSE	TRUE	FALSE	FALSE	FALSE
chr9	98943906	99070787	COL15A1	0	+	25	0	25	0.5	acp7_c2_rnaAligned	0.197035	5.96046e-08	2.42462e-06	TRUE	TRUE	TRUE	TRUE	TRUE
chr4	108808724	109302658	COL25A1	0	-	19	1	20	0.45	acp6_c5_rnaAligned	0.0404912	4.00543e-05	0.00113944	TRUE	TRUE	TRUE	TRUE	FALSE
chr4	108808724	109302658	COL25A1	0	-	18	11	29	0.12069	acp6_c6_rnaAligned	0.0587123	0.264931	0.670523	FALSE	FALSE	FALSE	FALSE	FALSE
chr4	108808724	109302658	COL25A1	0	-	12	10	22	0.0454545	acp7_c1_rnaAligned	0.0445404	0.831812	1	FALSE	FALSE	FALSE	FALSE	FALSE
chr4	108808724	109302658	COL25A1	0	-	7	9	16	-0.0625	acp7_c2_rnaAligned	0.032393	0.803619	1	FALSE	FALSE	FALSE	FALSE	FALSE
chr4	108808724	109302658	COL25A1	0	-	2	16	18	-0.388889	acp7_c4_rnaAligned	0.0364421	0.00131226	0.0193759	TRUE	TRUE	TRUE	FALSE	FALSE
chr13	75525213	75549439	COMMD6	0	-	128	117	245	0.022449	acp6_c1_rnaAligned	10.1131	0.522988	0.867474	FALSE	FALSE	FALSE	FALSE	FALSE
chr13	75525213	75549439	COMMD6	0	-	123	115	238	0.0168067	acp6_c2_rnaAligned	9.82416	0.650106	0.952024	FALSE	FALSE	FALSE	FALSE	FALSE
chr13	75525213	75549439	COMMD6	0	-	88	103	191	-0.039267	acp6_c5_rnaAligned	7.88409	0.311054	0.74233	FALSE	FALSE	FALSE	FALSE	FALSE
chr13	75525213	75549439	COMMD6	0	-	115	121	236	-0.0127119	acp6_c6_rnaAligned	9.7416	0.744902	0.994678	FALSE	FALSE	FALSE	FALSE	FALSE
chr13	75525213	75549439	COMMD6	0	-	16	8	24	0.166667	acp7_c1_rnaAligned	0.990671	0.15159	0.535651	FALSE	FALSE	FALSE	FALSE	FALSE
chr13	75525213	75549439	COMMD6	0	-	18	4	22	0.318182	acp7_c2_rnaAligned	0.908115	0.00434351	0.049592	TRUE	TRUE	TRUE	FALSE	FALSE
chr13	75525213	75549439	COMMD6	0	-	6	5	11	0.0454545	acp7_c4_rnaAligned	0.454058	1	1	FALSE	FALSE	FALSE	FALSE	FALSE
chr11	36272291	36289424	COMMD9	0	-	32	36	68	-0.0294118	acp6_c1_rnaAligned	3.96895	0.716301	0.982045	FALSE	FALSE	FALSE	FALSE	FALSE
chr11	36272291	36289424	COMMD9	0	-	43	36	79	0.0443038	acp6_c2_rnaAligned	4.61098	0.499897	0.866708	FALSE	FALSE	FALSE	FALSE	FALSE
chr11	36272291	36289424	COMMD9	0	-	29	27	56	0.0178571	acp6_c5_rnaAligned	3.26855	0.893853	1	FALSE	FALSE	FALSE	FALSE	FALSE
chr11	36272291	36289424	COMMD9	0	-	26	31	57	-0.0438596	acp6_c6_rnaAligned	3.32691	0.596642	0.923715	FALSE	FALSE	FALSE	FALSE	FALSE
chr11	36272291	36289424	COMMD9	0	-	3	9	12	-0.25	acp7_c1_rnaAligned	0.700403	0.145996	0.526486	FALSE	TRUE	FALSE	FALSE	FALSE
chr11	36272291	36289424	COMMD9	0	-	12	1	13	0.423077	acp7_c4_rnaAligned	0.75877	0.00341797	0.0415024	TRUE	TRUE	TRUE	TRUE	FALSE
chr8	67043078	67062133	COPS5	0	-	5	8	13	-0.115385	acp6_c1_rnaAligned	0.682236	0.581055	0.904093	FALSE	FALSE	FALSE	FALSE	FALSE
chr8	67043078	67062133	COPS5	0	-	6	7	13	-0.0384615	acp6_c2_rnaAligned	0.682236	1	1	FALSE	FALSE	FALSE	FALSE	FALSE
chr8	67043078	67062133	COPS5	0	-	2	17	19	-0.394737	acp6_c6_rnaAligned	0.997114	0.000728607	0.0119915	TRUE	TRUE	TRUE	FALSE	FALSE
chr10	123745638	123944104	CPXM2	0	-	89	77	166	0.0361446	acp7_c2_rnaAligned	0.836415	0.393301	0.780337	FALSE	FALSE	FALSE	FALSE	FALSE
chr10	123745638	123944104	CPXM2	0	-	7	112	119	-0.441176	acp7_c4_rnaAligned	0.599599	1.79588e-25	2.58901e-23	TRUE	TRUE	TRUE	TRUE	FALSE
chr4	8592764	8619752	CPZ	0	+	6	7	13	-0.0384615	acp6_c1_rnaAligned	0.481696	1	1	FALSE	FALSE	FALSE	FALSE	FALSE
chr4	8592764	8619752	CPZ	0	+	9	6	15	0.1	acp6_c2_rnaAligned	0.555803	0.607239	0.923172	FALSE	FALSE	FALSE	FALSE	FALSE
chr4	8592764	8619752	CPZ	0	+	2	17	19	-0.394737	acp6_c5_rnaAligned	0.704017	0.000728607	0.0127456	TRUE	TRUE	TRUE	FALSE	FALSE
chr4	8592764	8619752	CPZ	0	+	5	15	20	-0.25	acp6_c6_rnaAligned	0.74107	0.0413895	0.239803	FALSE	TRUE	FALSE	FALSE	FALSE
chr4	8592764	8619752	CPZ	0	+	5	4	9	0.0555556	acp7_c1_rnaAligned	0.333482	1	1	FALSE	FALSE	FALSE	FALSE	FALSE
chr1	207645132	207723703	CR1L	0	+	21	0	21	0.5	acp6_c1_rnaAligned	0.267274	9.53674e-07	2.71686e-05	TRUE	TRUE	TRUE	TRUE	TRUE
chr1	207645132	207723703	CR1L	0	+	9	1	10	0.4	acp6_c2_rnaAligned	0.127273	0.0214844	0.142419	FALSE	TRUE	TRUE	TRUE	FALSE
chr1	207645132	207723703	CR1L	0	+	15	1	16	0.4375	acp6_c5_rnaAligned	0.203637	0.000518799	0.00973277	TRUE	TRUE	TRUE	TRUE	FALSE
chr1	207645132	207723703	CR1L	0	+	10	1	11	0.409091	acp6_c6_rnaAligned	0.140001	0.0117188	0.104627	FALSE	TRUE	TRUE	TRUE	FALSE
chr1	207645132	207723703	CR1L	0	+	5	3	8	0.125	acp7_c1_rnaAligned	0.101819	0.726562	1	FALSE	FALSE	FALSE	FALSE	FALSE
chr7	66114817	66154568	CRCP	0	+	4	51	55	-0.427273	acp6_c1_rnaAligned	1.38361	2.04742e-11	9.98274e-10	TRUE	TRUE	TRUE	TRUE	FALSE
chr7	66114817	66154568	CRCP	0	+	5	34	39	-0.371795	acp6_c2_rnaAligned	0.981107	2.42991e-06	6.53349e-05	TRUE	TRUE	TRUE	FALSE	FALSE
chr7	66114817	66154568	CRCP	0	+	2	38	40	-0.45	acp6_c5_rnaAligned	1.00626	1.49339e-09	8.52759e-08	TRUE	TRUE	TRUE	TRUE	FALSE
chr7	66114817	66154568	CRCP	0	+	9	33	42	-0.285714	acp6_c6_rnaAligned	1.05658	0.000271539	0.00509877	TRUE	TRUE	FALSE	FALSE	FALSE
chr7	66114817	66154568	CRCP	0	+	32	50	82	-0.109756	acp7_c1_rnaAligned	2.06284	0.0598083	0.322758	FALSE	FALSE	FALSE	FALSE	FALSE
chr7	66114817	66154568	CRCP	0	+	24	25	49	-0.0102041	acp7_c2_rnaAligned	1.23267	1	1	FALSE	FALSE	FALSE	FALSE	FALSE
chr7	66114817	66154568	CRCP	0	+	37	30	67	0.0522388	acp7_c4_rnaAligned	1.68549	0.463818	0.854265	FALSE	FALSE	FALSE	FALSE	FALSE
chr1	167541012	167553762	CREG1	0	-	10	15	25	-0.1	acp6_c1_rnaAligned	1.96078	0.424356	0.794126	FALSE	FALSE	FALSE	FALSE	FALSE
chr1	167541012	167553762	CREG1	0	-	9	15	24	-0.125	acp6_c2_rnaAligned	1.88235	0.307456	0.698507	FALSE	FALSE	FALSE	FALSE	FALSE
chr1	167541012	167553762	CREG1	0	-	10	13	23	-0.0652174	acp6_c5_rnaAligned	1.80392	0.677639	0.96958	FALSE	FALSE	FALSE	FALSE	FALSE
chr1	167541012	167553762	CREG1	0	-	8	18	26	-0.192308	acp6_c6_rnaAligned	2.03922	0.0755187	0.350937	FALSE	FALSE	FALSE	FALSE	FALSE
chr1	167541012	167553762	CREG1	0	-	4	34	38	-0.394737	acp7_c1_rnaAligned	2.98039	6.03854e-07	2.4814e-05	TRUE	TRUE	TRUE	FALSE	FALSE
chr1	167541012	167553762	CREG1	0	-	6	11	17	-0.147059	acp7_c2_rnaAligned	1.33333	0.332306	0.728804	FALSE	FALSE	FALSE	FALSE	FALSE
chr1	167541012	167553762	CREG1	0	-	1	8	9	-0.388889	acp7_c4_rnaAligned	0.705882	0.0390625	0.240098	FALSE	TRUE	TRUE	FALSE	FALSE
chr16	84819984	84909508	CRISPLD2	0	+	158	65	223	0.20852	acp6_c1_rnaAligned	2.49095	4.06299e-10	1.81593e-08	TRUE	TRUE	FALSE	FALSE	FALSE
chr16	84819984	84909508	CRISPLD2	0	+	94	57	151	0.122517	acp6_c2_rnaAligned	1.6867	0.00325941	0.0366773	TRUE	FALSE	FALSE	FALSE	FALSE
chr16	84819984	84909508	CRISPLD2	0	+	51	55	106	-0.0188679	acp6_c5_rnaAligned	1.18404	0.770919	1	FALSE	FALSE	FALSE	FALSE	FALSE
chr16	84819984	84909508	CRISPLD2	0	+	170	176	346	-0.00867052	acp6_c6_rnaAligned	3.86489	0.788129	1	FALSE	FALSE	FALSE	FALSE	FALSE
chr16	84819984	84909508	CRISPLD2	0	+	5	14	19	-0.236842	acp7_c1_rnaAligned	0.212234	0.0635681	0.337428	FALSE	TRUE	FALSE	FALSE	FALSE
chr16	84819984	84909508	CRISPLD2	0	+	12	7	19	0.131579	acp7_c2_rnaAligned	0.212234	0.359283	0.750918	FALSE	FALSE	FALSE	FALSE	FALSE
chr16	84819984	84909508	CRISPLD2	0	+	43	8	51	0.343137	acp7_c4_rnaAligned	0.56968	6.86712e-07	2.45267e-05	TRUE	TRUE	TRUE	FALSE	FALSE
chr4	5820763	5893086	CRMP1	0	-	55	10	65	0.346154	acp6_c1_rnaAligned	0.898746	1.17536e-08	4.46027e-07	TRUE	TRUE	TRUE	FALSE	FALSE
chr4	5820763	5893086	CRMP1	0	-	13	6	19	0.184211	acp6_c2_rnaAligned	0.26271	0.167068	0.508065	FALSE	FALSE	FALSE	FALSE	FALSE
chr4	5820763	5893086	CRMP1	0	-	21	8	29	0.224138	acp6_c5_rnaAligned	0.400979	0.0241195	0.180045	FALSE	TRUE	FALSE	FALSE	FALSE
chr4	5820763	5893086	CRMP1	0	-	22	4	26	0.346154	acp6_c6_rnaAligned	0.359498	0.000533521	0.00915894	TRUE	TRUE	TRUE	FALSE	FALSE
chr3	33114013	33147773	CRTAP	0	+	584	547	1131	0.0163572	acp6_c1_rnaAligned	33.5012	0.284406	0.669804	FALSE	FALSE	FALSE	FALSE	FALSE
chr3	33114013	33147773	CRTAP	0	+	703	729	1432	-0.00907821	acp6_c2_rnaAligned	42.4171	0.508854	0.874052	FALSE	FALSE	FALSE	FALSE	FALSE
chr3	33114013	33147773	CRTAP	0	+	568	547	1115	0.00941704	acp6_c5_rnaAligned	33.0273	0.549224	0.916896	FALSE	FALSE	FALSE	FALSE	FALSE
chr3	33114013	33147773	CRTAP	0	+	621	616	1237	0.00202102	acp6_c6_rnaAligned	36.641	0.909458	1	FALSE	FALSE	FALSE	FALSE	FALSE
chr3	33114013	33147773	CRTAP	0	+	13	8	21	0.119048	acp7_c1_rnaAligned	0.622038	0.38331	0.803768	FALSE	FALSE	FALSE	FALSE	FALSE
chr3	33114013	33147773	CRTAP	0	+	6	12	18	-0.166667	acp7_c2_rnaAligned	0.533175	0.237885	0.626236	FALSE	FALSE	FALSE	FALSE	FALSE
chr3	33114013	33147773	CRTAP	0	+	0	10	10	-0.5	acp7_c4_rnaAligned	0.296209	0.00195312	0.0262561	TRUE	TRUE	TRUE	TRUE	TRUE
chr12	106991363	107093549	CRY1	0	-	18	12	30	0.1	acp6_c1_rnaAligned	0.293582	0.361595	0.747054	FALSE	FALSE	FALSE	FALSE	FALSE
chr12	106991363	107093549	CRY1	0	-	12	11	23	0.0217391	acp6_c2_rnaAligned	0.22508	1	1	FALSE	FALSE	FALSE	FALSE	FALSE
chr12	106991363	107093549	CRY1	0	-	17	21	38	-0.0526316	acp6_c6_rnaAligned	0.371871	0.627103	0.936273	FALSE	FALSE	FALSE	FALSE	FALSE
chr12	106991363	107093549	CRY1	0	-	5	24	29	-0.327586	acp7_c1_rnaAligned	0.283796	0.000546113	0.0100666	TRUE	TRUE	TRUE	FALSE	FALSE
chr12	106991363	107093549	CRY1	0	-	11	17	28	-0.107143	acp7_c2_rnaAligned	0.27401	0.344928	0.73776	FALSE	FALSE	FALSE	FALSE	FALSE
chr12	106991363	107093549	CRY1	0	-	3	5	8	-0.125	acp7_c4_rnaAligned	0.0782886	0.726562	0.996181	FALSE	FALSE	FALSE	FALSE	FALSE
chr3	186538442	186544380	CRYGS	0	-	8	3	11	0.227273	acp7_c1_rnaAligned	1.85248	0.226562	0.643857	FALSE	TRUE	FALSE	FALSE	FALSE
chr3	186538442	186544380	CRYGS	0	-	3	9	12	-0.25	acp7_c2_rnaAligned	2.02088	0.145996	0.497101	FALSE	TRUE	FALSE	FALSE	FALSE
chr3	186538442	186544380	CRYGS	0	-	0	11	11	-0.5	acp7_c4_rnaAligned	1.85248	0.000976562	0.0152725	TRUE	TRUE	TRUE	TRUE	TRUE
chr20	472497	543790	CSNK2A1	0	-	108	11	119	0.407563	acp6_c1_rnaAligned	1.66917	3.52445e-21	3.0164e-19	TRUE	TRUE	TRUE	TRUE	FALSE
chr20	472497	543790	CSNK2A1	0	-	156	6	162	0.462963	acp6_c2_rnaAligned	2.27231	8.12942e-39	1.24963e-36	TRUE	TRUE	TRUE	TRUE	TRUE
chr20	472497	543790	CSNK2A1	0	-	93	5	98	0.44898	acp6_c5_rnaAligned	1.37461	4.52365e-22	5.44439e-20	TRUE	TRUE	TRUE	TRUE	FALSE
chr20	472497	543790	CSNK2A1	0	-	120	23	143	0.339161	acp6_c6_rnaAligned	2.00581	4.92241e-17	4.28094e-15	TRUE	TRUE	TRUE	FALSE	FALSE
chr20	472497	543790	CSNK2A1	0	-	41	35	76	0.0394737	acp7_c1_rnaAligned	1.06602	0.566573	0.925283	FALSE	FALSE	FALSE	FALSE	FALSE
chr20	472497	543790	CSNK2A1	0	-	24	22	46	0.0217391	acp7_c2_rnaAligned	0.645225	0.882996	1	FALSE	FALSE	FALSE	FALSE	FALSE
chr20	472497	543790	CSNK2A1	0	-	23	21	44	0.0227273	acp7_c4_rnaAligned	0.617171	0.880396	1	FALSE	FALSE	FALSE	FALSE	FALSE
chr1	84549610	84574440	CTBS	0	-	276	169	445	0.120225	acp6_c1_rnaAligned	17.9219	4.46034e-07	1.33396e-05	TRUE	FALSE	FALSE	FALSE	FALSE
chr1	84549610	84574440	CTBS	0	-	428	251	679	0.130339	acp6_c2_rnaAligned	27.346	1.10455e-11	5.84335e-10	TRUE	FALSE	FALSE	FALSE	FALSE
chr1	84549610	84574440	CTBS	0	-	289	163	452	0.139381	acp6_c5_rnaAligned	18.2038	3.27989e-09	1.79431e-07	TRUE	FALSE	FALSE	FALSE	FALSE
chr1	84549610	84574440	CTBS	0	-	316	205	521	0.106526	acp6_c6_rnaAligned	20.9827	1.32078e-06	4.087e-05	TRUE	FALSE	FALSE	FALSE	FALSE
chr1	84549610	84574440	CTBS	0	-	20	16	36	0.0555556	acp7_c1_rnaAligned	1.44986	0.617719	0.950442	FALSE	FALSE	FALSE	FALSE	FALSE
chr1	84549610	84574440	CTBS	0	-	13	18	31	-0.0806452	acp7_c2_rnaAligned	1.24849	0.47313	0.856054	FALSE	FALSE	FALSE	FALSE	FALSE
chr1	84549610	84574440	CTBS	0	-	5	20	25	-0.3	acp7_c4_rnaAligned	1.00685	0.00407732	0.0475427	TRUE	TRUE	TRUE	FALSE	FALSE
chr21	17513042	17636262	CXADR	0	+	83	20	103	0.305825	acp6_c1_rnaAligned	0.835903	2.65534e-10	1.2069e-08	TRUE	TRUE	TRUE	FALSE	FALSE
chr21	17513042	17636262	CXADR	0	+	18	5	23	0.282609	acp6_c2_rnaAligned	0.186658	0.010622	0.0883939	FALSE	TRUE	FALSE	FALSE	FALSE
chr21	17513042	17636262	CXADR	0	+	26	16	42	0.119048	acp6_c5_rnaAligned	0.340854	0.164149	0.549953	FALSE	FALSE	FALSE	FALSE	FALSE
chr21	17513042	17636262	CXADR	0	+	35	17	52	0.173077	acp6_c6_rnaAligned	0.422009	0.0175332	0.138424	FALSE	FALSE	FALSE	FALSE	FALSE
chr21	17513042	17636262	CXADR	0	+	50	3	53	0.443396	acp7_c1_rnaAligned	0.430125	5.51958e-12	3.90731e-10	TRUE	TRUE	TRUE	TRUE	FALSE
chr21	17513042	17636262	CXADR	0	+	13	0	13	0.5	acp7_c2_rnaAligned	0.105502	0.000244141	0.00483207	TRUE	TRUE	TRUE	TRUE	TRUE
chr21	17513042	17636262	CXADR	0	+	19	1	20	0.45	acp7_c4_rnaAligned	0.162311	4.00543e-05	0.000971225	TRUE	TRUE	TRUE	TRUE	FALSE
chr4	73869392	73871308	CXCL1	0	+	18	27	45	-0.1	acp7_c1_rnaAligned	23.4864	0.232693	0.648431	FALSE	FALSE	FALSE	FALSE	FALSE
chr4	73869392	73871308	CXCL1	0	+	18	4	22	0.318182	acp7_c4_rnaAligned	11.4823	0.00434351	0.0496249	TRUE	TRUE	TRUE	FALSE	FALSE
chr10	44370164	44385097	CXCL12	0	-	281	191	472	0.095339	acp6_c1_rnaAligned	31.6078	3.98892e-05	0.000814489	TRUE	FALSE	FALSE	FALSE	FALSE
chr10	44370164	44385097	CXCL12	0	-	161	136	297	0.0420875	acp6_c2_rnaAligned	19.8888	0.163624	0.504558	FALSE	FALSE	FALSE	FALSE	FALSE
chr10	44370164	44385097	CXCL12	0	-	129	126	255	0.00588235	acp6_c5_rnaAligned	17.0763	0.900362	1	FALSE	FALSE	FALSE	FALSE	FALSE
chr10	44370164	44385097	CXCL12	0	-	117	47	164	0.213415	acp6_c6_rnaAligned	10.9824	4.49678e-08	1.72802e-06	TRUE	TRUE	FALSE	FALSE	FALSE
chr10	44370164	44385097	CXCL12	0	-	5	12	17	-0.205882	acp7_c1_rnaAligned	1.13842	0.143463	0.525551	FALSE	TRUE	FALSE	FALSE	FALSE
chr10	44370164	44385097	CXCL12	0	-	33	156	189	-0.325397	acp7_c2_rnaAligned	12.6565	2.52823e-20	2.76568e-18	TRUE	TRUE	TRUE	FALSE	FALSE
chr10	44370164	44385097	CXCL12	0	-	11	4	15	0.233333	acp7_c4_rnaAligned	1.00449	0.118469	0.457101	FALSE	TRUE	FALSE	FALSE	FALSE
chr4	186191566	186213463	CYP4V2	0	+	47	144	191	-0.253927	acp6_c1_rnaAligned	8.72266	1.20702e-12	6.43078e-11	TRUE	TRUE	FALSE	FALSE	FALSE
chr4	186191566	186213463	CYP4V2	0	+	67	160	227	-0.204846	acp6_c2_rnaAligned	10.3667	5.90792e-10	2.67399e-08	TRUE	TRUE	FALSE	FALSE	FALSE
chr4	186191566	186213463	CYP4V2	0	+	39	138	177	-0.279661	acp6_c5_rnaAligned	8.0833	3.58544e-14	2.77712e-12	TRUE	TRUE	FALSE	FALSE	FALSE
chr4	186191566	186213463	CYP4V2	0	+	74	174	248	-0.201613	acp6_c6_rnaAligned	11.3258	1.85393e-10	9.57324e-09	TRUE	TRUE	FALSE	FALSE	FALSE
chr4	186191566	186213463	CYP4V2	0	+	96	24	120	0.3	acp7_c1_rnaAligned	5.4802	2.16223e-11	1.42302e-09	TRUE	TRUE	TRUE	FALSE	FALSE
chr4	186191566	186213463	CYP4V2	0	+	147	25	172	0.354651	acp7_c2_rnaAligned	7.85496	3.19685e-22	3.86246e-20	TRUE	TRUE	TRUE	FALSE	FALSE
chr4	186191566	186213463	CYP4V2	0	+	91	20	111	0.31982	acp7_c4_rnaAligned	5.06919	5.25256e-12	3.35867e-10	TRUE	TRUE	TRUE	FALSE	FALSE
chr2	16549458	16665834	CYRIA	0	-	6	38	44	-0.363636	acp6_c1_rnaAligned	0.378085	9.43038e-07	2.70955e-05	TRUE	TRUE	TRUE	FALSE	FALSE
chr2	16549458	16665834	CYRIA	0	-	22	23	45	-0.0111111	acp6_c2_rnaAligned	0.386678	1	1	FALSE	FALSE	FALSE	FALSE	FALSE
chr2	16549458	16665834	CYRIA	0	-	53	48	101	0.0247525	acp6_c5_rnaAligned	0.867877	0.690826	0.974456	FALSE	FALSE	FALSE	FALSE	FALSE
chr2	16549458	16665834	CYRIA	0	-	54	34	88	0.113636	acp6_c6_rnaAligned	0.75617	0.0422106	0.243304	FALSE	FALSE	FALSE	FALSE	FALSE
chr6	73394827	73417566	DDX43	0	+	18	0	18	0.5	acp6_c2_rnaAligned	0.791592	7.62939e-06	0.000188354	TRUE	TRUE	TRUE	TRUE	TRUE
chr6	73394827	73417566	DDX43	0	+	15	0	15	0.5	acp6_c6_rnaAligned	0.65966	6.10352e-05	0.00139688	TRUE	TRUE	TRUE	TRUE	TRUE
chr1	200640804	200669907	DDX59	0	-	6	32	38	-0.342105	acp6_c1_rnaAligned	1.30571	2.43426e-05	0.000523625	TRUE	TRUE	TRUE	FALSE	FALSE
chr1	200640804	200669907	DDX59	0	-	24	25	49	-0.0102041	acp6_c2_rnaAligned	1.68368	1	1	FALSE	FALSE	FALSE	FALSE	FALSE
chr1	200640804	200669907	DDX59	0	-	12	16	28	-0.0714286	acp6_c5_rnaAligned	0.9621	0.571588	0.925806	FALSE	FALSE	FALSE	FALSE	FALSE
chr1	200640804	200669907	DDX59	0	-	27	40	67	-0.0970149	acp6_c6_rnaAligned	2.30217	0.142071	0.492231	FALSE	FALSE	FALSE	FALSE	FALSE
chr1	200640804	200669907	DDX59	0	-	9	8	17	0.0294118	acp7_c1_rnaAligned	0.584132	1	1	FALSE	FALSE	FALSE	FALSE	FALSE
chr1	200640804	200669907	DDX59	0	-	12	6	18	0.166667	acp7_c2_rnaAligned	0.618493	0.237885	0.626236	FALSE	FALSE	FALSE	FALSE	FALSE
chr1	200640804	200669907	DDX59	0	-	14	15	29	-0.0172414	acp7_c4_rnaAligned	0.996461	1	1	FALSE	FALSE	FALSE	FALSE	FALSE
chr6	35297817	35321771	DEF6	0	+	6	17	23	-0.23913	acp6_c1_rnaAligned	0.960174	0.0346897	0.201501	FALSE	TRUE	FALSE	FALSE	FALSE
chr6	35297817	35321771	DEF6	0	+	3	16	19	-0.342105	acp6_c2_rnaAligned	0.793187	0.00442505	0.046042	TRUE	TRUE	TRUE	FALSE	FALSE
chr6	35297817	35321771	DEF6	0	+	5	14	19	-0.236842	acp6_c5_rnaAligned	0.793187	0.0635681	0.327755	FALSE	TRUE	FALSE	FALSE	FALSE
chr6	35297817	35321771	DEF6	0	+	5	9	14	-0.142857	acp6_c6_rnaAligned	0.584454	0.42395	0.813464	FALSE	FALSE	FALSE	FALSE	FALSE
chr7	140518419	140641460	DENND2A	0	-	2	11	13	-0.346154	acp6_c1_rnaAligned	0.105656	0.0224609	0.147268	FALSE	TRUE	TRUE	FALSE	FALSE
chr7	140518419	140641460	DENND2A	0	-	1	10	11	-0.409091	acp6_c5_rnaAligned	0.0894011	0.0117188	0.11032	FALSE	TRUE	TRUE	TRUE	FALSE
chr7	140518419	140641460	DENND2A	0	-	5	12	17	-0.205882	acp6_c6_rnaAligned	0.138165	0.143463	0.492231	FALSE	TRUE	FALSE	FALSE	FALSE
chr7	140518419	140641460	DENND2A	0	-	7	8	15	-0.0333333	acp7_c1_rnaAligned	0.121911	1	1	FALSE	FALSE	FALSE	FALSE	FALSE
chr7	140518419	140641460	DENND2A	0	-	15	0	15	0.5	acp7_c2_rnaAligned	0.121911	6.10352e-05	0.00144047	TRUE	TRUE	TRUE	TRUE	TRUE
chr7	140518419	140641460	DENND2A	0	-	17	10	27	0.12963	acp7_c4_rnaAligned	0.219439	0.247789	0.656437	FALSE	FALSE	FALSE	FALSE	FALSE
chr1	244653125	244709033	DESI2	0	+	169	45	214	0.28972	acp6_c1_rnaAligned	3.82772	4.34987e-18	3.27053e-16	TRUE	TRUE	FALSE	FALSE	FALSE
chr1	244653125	244709033	DESI2	0	+	225	71	296	0.260135	acp6_c2_rnaAligned	5.29441	8.21338e-20	6.97025e-18	TRUE	TRUE	FALSE	FALSE	FALSE
chr1	244653125	244709033	DESI2	0	+	154	34	188	0.319149	acp6_c5_rnaAligned	3.36267	1.92457e-19	2.06246e-17	TRUE	TRUE	TRUE	FALSE	FALSE
chr1	244653125	244709033	DESI2	0	+	187	71	258	0.224806	acp6_c6_rnaAligned	4.61472	3.21425e-13	2.14162e-11	TRUE	TRUE	FALSE	FALSE	FALSE
chr1	244653125	244709033	DESI2	0	+	128	149	277	-0.0379061	acp7_c1_rnaAligned	4.95457	0.229424	0.643857	FALSE	FALSE	FALSE	FALSE	FALSE
chr1	244653125	244709033	DESI2	0	+	127	111	238	0.0336134	acp7_c2_rnaAligned	4.25699	0.330909	0.728804	FALSE	FALSE	FALSE	FALSE	FALSE
chr1	244653125	244709033	DESI2	0	+	113	106	219	0.0159817	acp7_c4_rnaAligned	3.91715	0.685248	0.983764	FALSE	FALSE	FALSE	FALSE	FALSE
chr7	14145048	14974858	DGKB	0	-	90	148	238	-0.121849	acp7_c1_rnaAligned	0.286813	0.000206054	0.00459207	TRUE	FALSE	FALSE	FALSE	FALSE
chr7	14145048	14974858	DGKB	0	-	28	8	36	0.277778	acp7_c2_rnaAligned	0.0433834	0.00119324	0.0182941	TRUE	TRUE	FALSE	FALSE	FALSE
chr7	14145048	14974858	DGKB	0	-	7	29	36	-0.305556	acp7_c4_rnaAligned	0.0433834	0.000312551	0.00594297	TRUE	TRUE	TRUE	FALSE	FALSE
chr11	46332925	46380554	DGKZ	0	+	8	13	21	-0.119048	acp6_c1_rnaAligned	0.440908	0.38331	0.767418	FALSE	FALSE	FALSE	FALSE	FALSE
chr11	46332925	46380554	DGKZ	0	+	5	7	12	-0.0833333	acp6_c2_rnaAligned	0.251947	0.774414	1	FALSE	FALSE	FALSE	FALSE	FALSE
chr11	46332925	46380554	DGKZ	0	+	4	9	13	-0.192308	acp6_c5_rnaAligned	0.272943	0.266846	0.688501	FALSE	FALSE	FALSE	FALSE	FALSE
chr11	46332925	46380554	DGKZ	0	+	9	5	14	0.142857	acp6_c6_rnaAligned	0.293939	0.42395	0.813464	FALSE	FALSE	FALSE	FALSE	FALSE
chr11	46332925	46380554	DGKZ	0	+	44	8	52	0.346154	acp7_c1_rnaAligned	1.09177	4.03932e-07	1.70159e-05	TRUE	TRUE	TRUE	FALSE	FALSE
chr11	46332925	46380554	DGKZ	0	+	40	2	42	0.452381	acp7_c2_rnaAligned	0.881816	4.11092e-10	2.1609e-08	TRUE	TRUE	TRUE	TRUE	TRUE
chr11	46332925	46380554	DGKZ	0	+	20	4	24	0.333333	acp7_c4_rnaAligned	0.503895	0.00154388	0.0217819	TRUE	TRUE	TRUE	FALSE	FALSE
chr14	24290597	24299780	DHRS1	0	-	32	14	46	0.195652	acp6_c1_rnaAligned	5.00926	0.0113516	0.091415	FALSE	FALSE	FALSE	FALSE	FALSE
chr14	24290597	24299780	DHRS1	0	-	63	15	78	0.307692	acp6_c2_rnaAligned	8.49396	3.74866e-08	1.46126e-06	TRUE	TRUE	TRUE	FALSE	FALSE
chr14	24290597	24299780	DHRS1	0	-	48	17	65	0.238462	acp6_c5_rnaAligned	7.0783	0.000152107	0.00358413	TRUE	TRUE	FALSE	FALSE	FALSE
chr14	24290597	24299780	DHRS1	0	-	47	12	59	0.29661	acp6_c6_rnaAligned	6.42492	5.12563e-06	0.000141632	TRUE	TRUE	FALSE	FALSE	FALSE
chr14	24290597	24299780	DHRS1	0	-	19	28	47	-0.0957447	acp7_c1_rnaAligned	5.11815	0.24296	0.665444	FALSE	FALSE	FALSE	FALSE	FALSE
chr14	24290597	24299780	DHRS1	0	-	27	17	44	0.113636	acp7_c2_rnaAligned	4.79146	0.174171	0.542345	FALSE	FALSE	FALSE	FALSE	FALSE
chr14	24290597	24299780	DHRS1	0	-	22	29	51	-0.0686275	acp7_c4_rnaAligned	5.55374	0.401062	0.806089	FALSE	FALSE	FALSE	FALSE	FALSE
chr17	42101410	42112714	DHX58	0	-	14	1	15	0.433333	acp6_c1_rnaAligned	1.32696	0.000976562	0.0129644	TRUE	TRUE	TRUE	TRUE	FALSE
chr17	42101410	42112714	DHX58	0	-	22	14	36	0.111111	acp6_c2_rnaAligned	3.18471	0.242985	0.617082	FALSE	FALSE	FALSE	FALSE	FALSE
chr17	42101410	42112714	DHX58	0	-	15	16	31	-0.016129	acp6_c5_rnaAligned	2.74239	1	1	FALSE	FALSE	FALSE	FALSE	FALSE
[truncated: 2,736 more rows]

## Sheet: AEI genes
chrom	start	stop	name (256 genes)	score	strand	paternal_counts	maternal_counts	total_reads	aei	sample	informative_reads_per_kb	binom_pval	fdr_pval	fdr_reject	70_percent_aei	80_percent_aei	90_percent_aei	95_percent_aei
[truncated: 1,462 more rows]

[truncated: 1 more sheets: SUMMARY]
